# Supplementary material
Source: Research Square preprint supplement (doi:10.21203/rs.3.rs-9481480/v1)

| Vector Autoregression Estimates | | |
| --- | --- | --- |
| Date: 08/28/25 Time: 13:26 | | |
| Sample (adjusted): 5/06/2020 1/24/2025 | | |
| Included observations: 1233 after adjustments | | |
| Standard errors in ( ) & t-statistics in [ ] | | |
|  |  |  |
|  |  |  |
|  | CBI1 | GBI1 |
|  |  |  |
|  |  |  |
| CBI1(-1) | 0.097060 | 0.391740 |
|  | (0.13424) | (0.14942) |
|  | [ 0.72305] | [ 2.62171] |
|  |  |  |
| CBI1(-2) | 0.174823 | 0.250624 |
|  | (0.13338) | (0.14846) |
|  | [ 1.31075] | [ 1.68811] |
|  |  |  |
| GBI1(-1) | -0.051366 | -0.331137 |
|  | (0.12051) | (0.13414) |
|  | [-0.42624] | [-2.46857] |
|  |  |  |
| GBI1(-2) | -0.117620 | -0.186758 |
|  | (0.12019) | (0.13378) |
|  | [-0.97866] | [-1.39600] |
|  |  |  |
| C | -0.000121 | -0.000225 |
|  | (0.00041) | (0.00045) |
|  | [-0.29654] | [-0.49614] |
|  |  |  |
| EVZ | -7.83E-07 | -2.63E-06 |
|  | (4.6E-06) | (5.1E-06) |
|  | [-0.17091] | [-0.51632] |
|  |  |  |
| GVZ | 5.79E-05 | 6.03E-05 |
|  | (3.1E-05) | (3.5E-05) |
|  | [ 1.85817] | [ 1.73610] |
|  |  |  |
| OVX | 2.01E-05 | 1.95E-05 |
|  | (1.0E-05) | (1.2E-05) |
|  | [ 1.94095] | [ 1.69352] |
|  |  |  |
| VIXIE | -8.85E-06 | -8.93E-06 |
|  | (5.8E-06) | (6.4E-06) |
|  | [-1.53742] | [-1.39299] |
|  |  |  |
| VSTOXX | -6.20E-05 | -5.85E-05 |
|  | (2.5E-05) | (2.7E-05) |
|  | [-2.52013] | [-2.13797] |
|  |  |  |
|  |  |  |
| R-squared | 0.022428 | 0.022644 |
| Adj. R-squared | 0.015234 | 0.015451 |
| Sum sq. resids | 0.007130 | 0.008834 |
| S.E. equation | 0.002414 | 0.002688 |
| F-statistic | 3.117666 | 3.148307 |
| Log likelihood | 5685.856 | 5553.721 |
| Akaike AIC | -9.206579 | -8.992248 |
| Schwarz SC | -9.165077 | -8.950746 |
| Mean dependent | 1.69E-05 | -8.16E-06 |
| S.D. dependent | 0.002433 | 0.002709 |
|  |  |  |
|  |  |  |
| Determinant resid covariance (dof adj.) | | 1.90E-12 |
| Determinant resid covariance | | 1.87E-12 |
| Log likelihood | | 13148.85 |
| Akaike information criterion | | -21.29578 |
| Schwarz criterion | | -21.21277 |
|  |  |  |
|  |  |  |

In a Vector Autoregression (VAR) model, the impulse response function (IRF) is a fundamental tool used to analyze the dynamic impact of a shock (or innovation) to one variable on the other variables in the system over time.

An impulse response function traces the effect of a one-time shock to one of the variables in the VAR system on the current and future values of all the variables in the system.


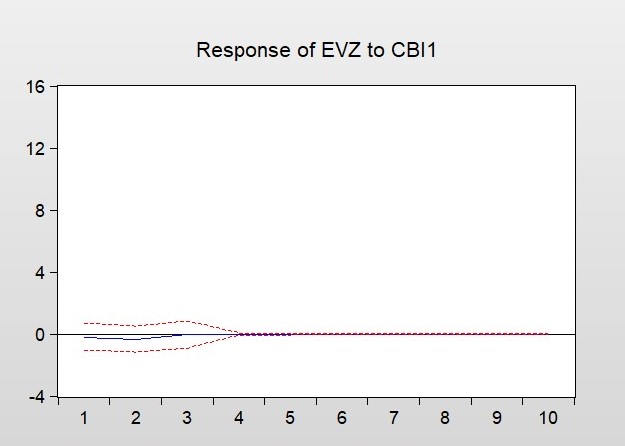


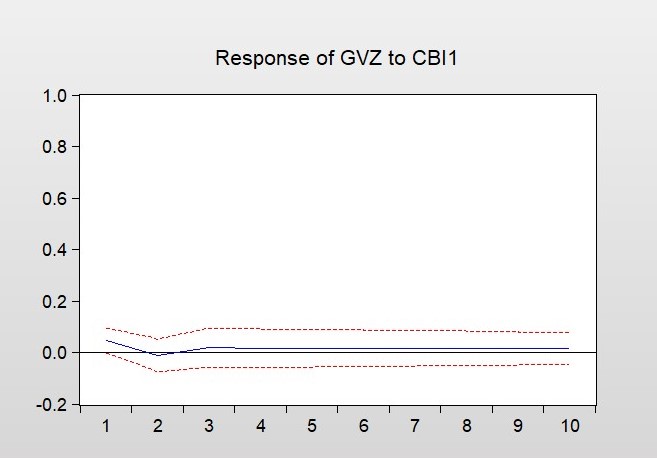


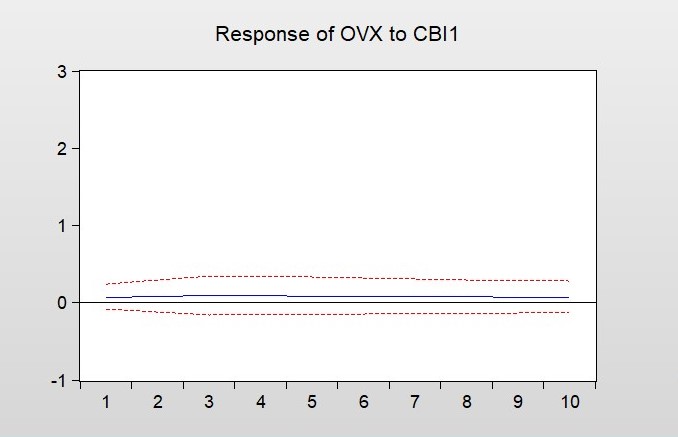


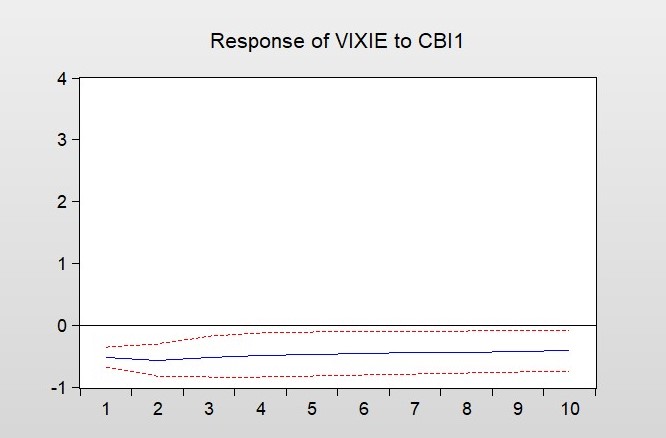


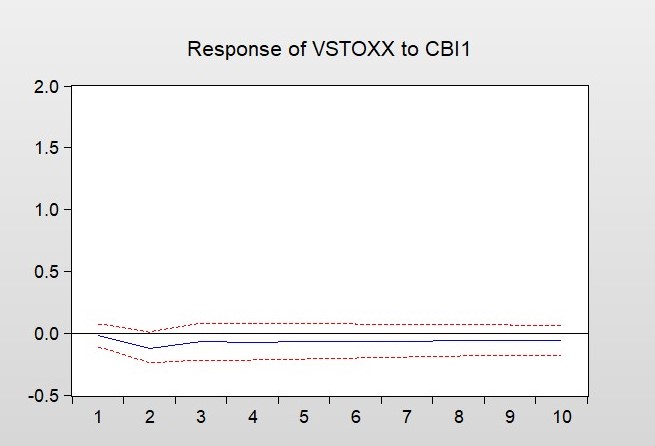


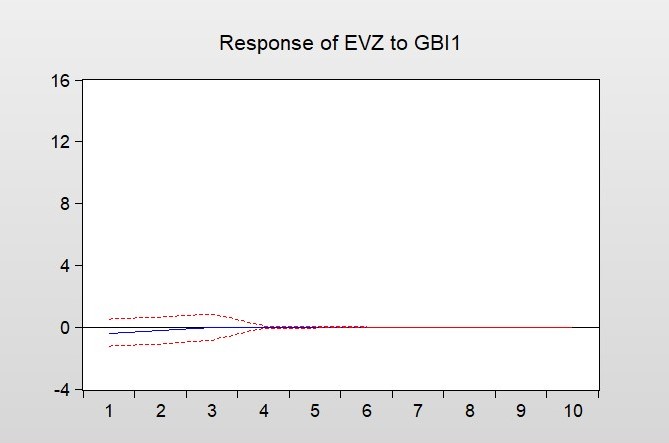


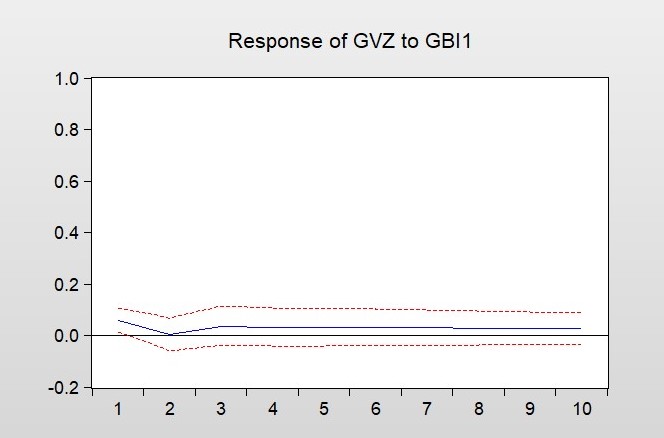


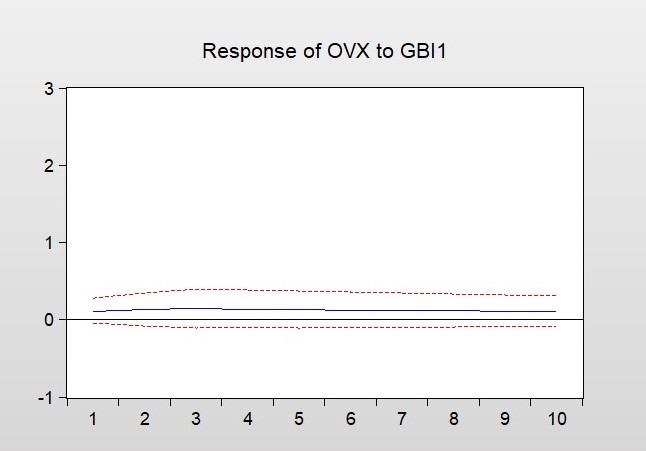


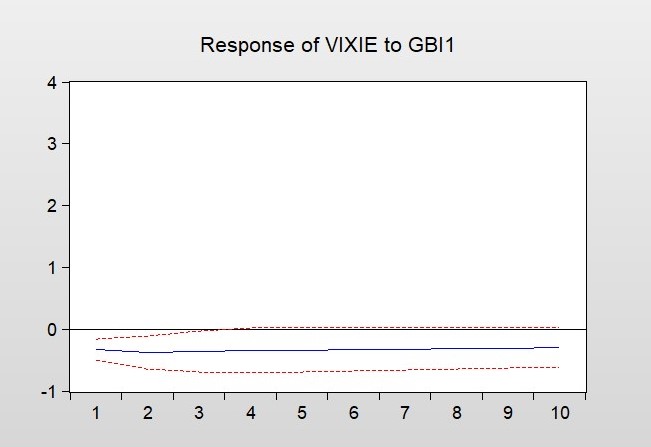


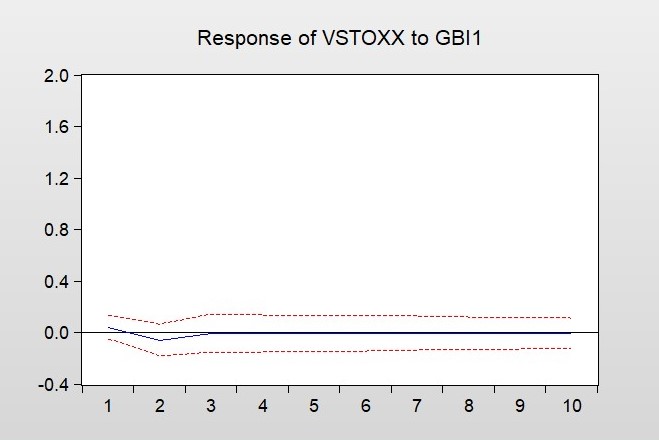

Supplement: Supplementary file 2 [file cfdb8b76ea2ff34c454be484.docx]
