# Supplementary material
Source: Research Square preprint supplement (doi:10.21203/rs.3.rs-9481480/v1)
Supplement: Supplementary file 1 [file c1dd2d1ac668d54fb42b351b.docx]

Descriptive statistics

|  | CBI1 | EVZ | GBI1 | GVZ | OVX | VIXIE | VSTOXX |
| --- | --- | --- | --- | --- | --- | --- | --- |
| Mean | 1.58E-05 | 8.212160 | -8.47E-06 | 17.10477 | 41.07149 | 41.81250 | 21.07911 |
| Median | 0.000000 | 7.330000 | 0.000000 | 16.69000 | 38.46500 | 36.03500 | 19.83000 |
| Maximum | 0.014488 | 533.0000 | 0.016572 | 31.70000 | 115.3900 | 102.1600 | 49.64000 |
| Minimum | -0.013219 | 4.710000 | -0.014203 | 10.22000 | 23.73000 | 19.49000 | 12.12000 |
| Std. Dev. | 0.002432 | 15.06767 | 0.002707 | 3.056672 | 11.33661 | 18.14655 | 5.948767 |
|  |  |  |  |  |  |  |  |
|  |  |  |  |  |  |  |  |
|  |  |  |  |  |  |  |  |
|  |  |  |  |  |  |  |  |
|  |  |  |  |  |  |  |  |
|  |  |  |  |  |  |  |  |
|  |  |  |  |  |  |  |  |
|  |  |  |  |  |  |  |  |
|  |  |  |  |  |  |  |  |
|  |  |  |  |  |  |  |  |

CBI1 and GBI1:

Very small means and medians near zero → likely daily/weekly returns.

Symmetric distributions around zero.

Low standard deviation (~0.0024 to 0.0027), implying low volatility.

No clear skew based on the mean/median.

EVZ (Euro Volatility Index):

Mean = 8.21, Median = 7.33 → slightly right-skewed.

Very high maximum value of 533.00 — likely an outlier or crisis-period spike.

Std. dev. = 15.07, indicating high variability.

Compare median and std. dev → volatility can be extreme in rare cases.

GVZ (Gold Volatility Index):

Mean = 17.10, Median = 16.69 → roughly symmetric.

Maximum = 31.70, Minimum = 10.22 → moderate spread.

Std. dev. = 3.06 → moderate risk profile.

OVX (Oil Volatility Index):

Mean = 41.07, Median = 38.47 → slightly right-skewed.

Very wide range (23.73 to 115.39).

Std. dev. = 11.34 → high volatility.

VIXIE (CBOE VIX Index Estimate):

Mean = 41.81, Median = 36.04 → right-skewed.

Maximum = 102.16 shows significant spikes in market stress.

High std. dev. (18.15) implies high fluctuation.

VSTOXX (European stock volatility index):

Mean = 21.08, Median = 19.83 → mildly right-skewed.

Std. dev. = 5.95, which is moderate.

Max = 49.64, Min = 12.12 → shows range of fear/stress in European equities.

Volatility indices (GVZ, OVX, VIXIE, VSTOXX, EVZ) are all right-skewed with large ranges, consistent with behavior during market stress.

CBI1 and GBI1 likely represent returns (e.g., of bond indices) and show much smaller values and lower volatility.

Outliers or extreme events are present in some volatility indices (notably EVZ, OVX, and VIXIE).

Correlation matrix

|  | CBI1 | EVZ | GBI1 | GVZ | OVX | VIXIE | VSTOXX |
| --- | --- | --- | --- | --- | --- | --- | --- |
| CBI1 | 1.000000 | -0.015901 | 0.975696 | -0.013587 | -0.037023 | -0.096814 | -0.090558 |
| EVZ | -0.015901 | 1.000000 | -0.026461 | 0.026064 | 0.036402 | 0.081509 | 0.059327 |
| GBI1 | 0.975696 | -0.026461 | 1.000000 | -0.007174 | -0.029531 | -0.084800 | -0.077050 |
| GVZ | -0.013587 | 0.026064 | -0.007174 | 1.000000 | 0.544767 | 0.437699 | 0.681847 |
| OVX | -0.037023 | 0.036402 | -0.029531 | 0.544767 | 1.000000 | 0.653479 | 0.783244 |
| VIXIE | -0.096814 | 0.081509 | -0.084800 | 0.437699 | 0.653479 | 1.000000 | 0.733460 |
| VSTOXX | -0.090558 | 0.059327 | -0.077050 | 0.681847 | 0.783244 | 0.733460 | 1.000000 |

Unit root test

| Null Hypothesis: CBI1 has a unit root | | | |  |
| --- | --- | --- | --- | --- |
| Exogenous: Constant | | |  |  |
| Lag Length: 0 (Automatic - based on SIC, maxlag=22) | | | | |
|  |  |  |  |  |
|  |  |  |  |  |
|  |  |  | t-Statistic | Prob.* |
|  |  |  |  |  |
|  |  |  |  |  |
| Augmented Dickey-Fuller test statistic | | | -33.03097 | 0.0000 |
| Test critical values: | 1% level |  | -3.435436 |  |
|  | 5% level |  | -2.863674 |  |
|  | 10% level |  | -2.567956 |  |
|  |  |  |  |  |
|  |  |  |  |  |
| *MacKinnon (1996) one-sided p-values. | | | |  |
| Null Hypothesis: GBI1 has a unit root | | | |  |
| Exogenous: Constant | | |  |  |
| Lag Length: 0 (Automatic - based on SIC, maxlag=22) | | | | |
|  |  |  |  |  |
|  |  |  |  |  |
|  |  |  | t-Statistic | Prob.* |
|  |  |  |  |  |
|  |  |  |  |  |
| Augmented Dickey-Fuller test statistic | | | -34.07246 | 0.0000 |
| Test critical values: | 1% level |  | -3.435436 |  |
|  | 5% level |  | -2.863674 |  |
|  | 10% level |  | -2.567956 |  |
|  |  |  |  |  |
|  |  |  |  |  |
| *MacKinnon (1996) one-sided p-values. | | | |  |
| Null Hypothesis: EVZ has a unit root | | | |  |
| Exogenous: Constant | | |  |  |
| Lag Length: 0 (Automatic - based on SIC, maxlag=22) | | | | |
|  |  |  |  |  |
|  |  |  |  |  |
|  |  |  | t-Statistic | Prob.* |
|  |  |  |  |  |
|  |  |  |  |  |
| Augmented Dickey-Fuller test statistic | | | -34.86446 | 0.0000 |
| Test critical values: | 1% level |  | -3.435432 |  |
|  | 5% level |  | -2.863672 |  |
|  | 10% level |  | -2.567955 |  |
|  |  |  |  |  |
|  |  |  |  |  |

| Null Hypothesis: GVZ has a unit root | | | |  |
| --- | --- | --- | --- | --- |
| Exogenous: Constant | | |  |  |
| Lag Length: 0 (Automatic - based on SIC, maxlag=22) | | | | |
|  |  |  |  |  |
|  |  |  |  |  |
|  |  |  | t-Statistic | Prob.* |
|  |  |  |  |  |
|  |  |  |  |  |
| Augmented Dickey-Fuller test statistic | | | -5.117054 | 0.0000 |
| Test critical values: | 1% level |  | -3.435432 |  |
|  | 5% level |  | -2.863672 |  |
|  | 10% level |  | -2.567955 |  |
|  |  |  |  |  |
|  |  |  |  |  |
| *MacKinnon (1996) one-sided p-values. | | | |  |

| Null Hypothesis: OVX has a unit root | | | |  |
| --- | --- | --- | --- | --- |
| Exogenous: Constant | | |  |  |
| Lag Length: 0 (Automatic - based on SIC, maxlag=22) | | | | |
|  |  |  |  |  |
|  |  |  |  |  |
|  |  |  | t-Statistic | Prob.* |
|  |  |  |  |  |
|  |  |  |  |  |
| Augmented Dickey-Fuller test statistic | | | -6.602267 | 0.0000 |
| Test critical values: | 1% level |  | -3.435432 |  |
|  | 5% level |  | -2.863672 |  |
|  | 10% level |  | -2.567955 |  |
|  |  |  |  |  |
|  |  |  |  |  |
| *MacKinnon (1996) one-sided p-values. | | | |  |

| Null Hypothesis: VIXIE has a unit root | | | |  |
| --- | --- | --- | --- | --- |
| Exogenous: Constant | | |  |  |
| Lag Length: 1 (Automatic - based on SIC, maxlag=22) | | | | |
|  |  |  |  |  |
|  |  |  |  |  |
|  |  |  | t-Statistic | Prob.* |
|  |  |  |  |  |
|  |  |  |  |  |
| Augmented Dickey-Fuller test statistic | | | -4.130002 | 0.0009 |
| Test critical values: | 1% level |  | -3.435436 |  |
|  | 5% level |  | -2.863674 |  |
|  | 10% level |  | -2.567956 |  |
|  |  |  |  |  |
|  |  |  |  |  |
| *MacKinnon (1996) one-sided p-values. | | | |  |

| Null Hypothesis: VSTOXX has a unit root | | | |  |
| --- | --- | --- | --- | --- |
| Exogenous: Constant | | |  |  |
| Lag Length: 0 (Automatic - based on SIC, maxlag=22) | | | | |
|  |  |  |  |  |
|  |  |  |  |  |
|  |  |  | t-Statistic | Prob.* |
|  |  |  |  |  |
|  |  |  |  |  |
| Augmented Dickey-Fuller test statistic | | | -5.259289 | 0.0000 |
| Test critical values: | 1% level |  | -3.435432 |  |
|  | 5% level |  | -2.863672 |  |
|  | 10% level |  | -2.567955 |  |
|  |  |  |  |  |
|  |  |  |  |  |
| *MacKinnon (1996) one-sided p-values. | | | |  |

granger causality

| Pairwise Granger Causality Tests | | | |
| --- | --- | --- | --- |
| Date: 08/25/25 Time: 12:48 | | | |
| Sample: 5/01/2020 1/24/2025 | | | |
| Lags: 2 | |  |  |
|  |  |  |  |
|  |  |  |  |
| Null Hypothesis: | Obs | F-Statistic | Prob. |
|  |  |  |  |
|  |  |  |  |
| EVZ does not Granger Cause CBI1 | 1233 | 0.10147 | 0.9035 |
| CBI1 does not Granger Cause EVZ | | 0.35695 | 0.6999 |
|  |  |  |  |
|  |  |  |  |
| GBI1 does not Granger Cause CBI1 | 1233 | 0.78526 | 0.4562 |
| CBI1 does not Granger Cause GBI1 | | 5.19383 | 0.0057 |
|  |  |  |  |
|  |  |  |  |
| GVZ does not Granger Cause CBI1 | 1233 | 2.89234 | 0.0558 |
| CBI1 does not Granger Cause GVZ | | 3.28689 | 0.0377 |
|  |  |  |  |
|  |  |  |  |
| OVX does not Granger Cause CBI1 | 1233 | 1.42015 | 0.2421 |
| CBI1 does not Granger Cause OVX | | 0.04119 | 0.9597 |
|  |  |  |  |
|  |  |  |  |
| VIXIE does not Granger Cause CBI1 | 1233 | 9.64055 | 7.E-05 |
| CBI1 does not Granger Cause VIXIE | | 0.40747 | 0.6654 |
|  |  |  |  |
|  |  |  |  |
| VSTOXX does not Granger Cause CBI1 | 1233 | 8.01476 | 0.0003 |
| CBI1 does not Granger Cause VSTOXX | | 2.89859 | 0.0555 |
|  |  |  |  |
|  |  |  |  |
| GBI1 does not Granger Cause EVZ | 1233 | 0.14112 | 0.8684 |
| EVZ does not Granger Cause GBI1 | | 0.01367 | 0.9864 |
|  |  |  |  |
|  |  |  |  |
| GVZ does not Granger Cause EVZ | 1234 | 0.68167 | 0.5060 |
| EVZ does not Granger Cause GVZ | | 0.22210 | 0.8009 |
|  |  |  |  |
|  |  |  |  |
| OVX does not Granger Cause EVZ | 1234 | 4.04178 | 0.0178 |
| EVZ does not Granger Cause OVX | | 0.64181 | 0.5265 |
|  |  |  |  |
|  |  |  |  |
| VIXIE does not Granger Cause EVZ | 1234 | 4.54746 | 0.0108 |
| EVZ does not Granger Cause VIXIE | | 0.65243 | 0.5210 |
|  |  |  |  |
|  |  |  |  |
| VSTOXX does not Granger Cause EVZ | 1234 | 2.78574 | 0.0621 |
| EVZ does not Granger Cause VSTOXX | | 2.00878 | 0.1346 |
|  |  |  |  |
|  |  |  |  |
| GVZ does not Granger Cause GBI1 | 1233 | 1.80597 | 0.1648 |
| GBI1 does not Granger Cause GVZ | | 3.15620 | 0.0429 |
|  |  |  |  |
|  |  |  |  |
| OVX does not Granger Cause GBI1 | 1233 | 1.09937 | 0.3334 |
| GBI1 does not Granger Cause OVX | | 0.11061 | 0.8953 |
|  |  |  |  |
|  |  |  |  |
| VIXIE does not Granger Cause GBI1 | 1233 | 7.11109 | 0.0009 |
| GBI1 does not Granger Cause VIXIE | | 0.06353 | 0.9385 |
|  |  |  |  |
|  |  |  |  |
| VSTOXX does not Granger Cause GBI1 | 1233 | 6.65378 | 0.0013 |
| GBI1 does not Granger Cause VSTOXX | | 2.59665 | 0.0749 |
|  |  |  |  |
|  |  |  |  |
| OVX does not Granger Cause GVZ | 1234 | 0.33734 | 0.7137 |
| GVZ does not Granger Cause OVX | | 4.71744 | 0.0091 |
|  |  |  |  |
|  |  |  |  |
| VIXIE does not Granger Cause GVZ | 1234 | 9.29773 | 0.0001 |
| GVZ does not Granger Cause VIXIE | | 1.67550 | 0.1876 |
|  |  |  |  |
|  |  |  |  |
| VSTOXX does not Granger Cause GVZ | 1234 | 4.91890 | 0.0075 |
| GVZ does not Granger Cause VSTOXX | | 3.77147 | 0.0233 |
|  |  |  |  |
|  |  |  |  |
| VIXIE does not Granger Cause OVX | 1234 | 13.5114 | 2.E-06 |
| OVX does not Granger Cause VIXIE | | 5.27246 | 0.0052 |
|  |  |  |  |
|  |  |  |  |
| VSTOXX does not Granger Cause OVX | 1234 | 17.4943 | 3.E-08 |
| OVX does not Granger Cause VSTOXX | | 0.98733 | 0.3729 |
|  |  |  |  |
|  |  |  |  |
| VSTOXX does not Granger Cause VIXIE | 1234 | 0.15286 | 0.8583 |
| VIXIE does not Granger Cause VSTOXX | | 6.68937 | 0.0013 |
|  |  |  |  |
|  |  |  |  |

VIXIE is a strong "causal driver," Granger causing multiple variables including CBI1, EVZ, GBI1, GVZ, OVX, and VSTOXX.

There are several bidirectional causal relationships, e.g.:

OVX ↔ VIXIE

GVZ → VSTOXX and VSTOXX → GVZ (only one direction is significant here, GVZ → VSTOXX, but VSTOXX → GVZ is borderline)

CBI1 Granger causes GBI1 and GVZ but is mainly a "receiver" from VIXIE and VSTOXX.

Volatility indices (VIXIE, VSTOXX, OVX, GVZ) show a network of causal influences, reflecting interconnectedness in volatility markets.

No causality detected between EVZ and CBI1 in either direction (high p-values).

| Vector Autoregression Estimates | | | |  |  |  |  |
| --- | --- | --- | --- | --- | --- | --- | --- |
| Date: 08/25/25 Time: 12:57 | | |  |  |  |  |  |
| Sample (adjusted): 5/06/2020 1/24/2025 | | | |  |  |  |  |
| Included observations: 1233 after adjustments | | | | |  |  |  |
| Standard errors in ( ) & t-statistics in [ ] | | | | |  |  |  |
|  |  |  |  |  |  |  |  |
|  |  |  |  |  |  |  |  |
|  | CBI1 | GBI1 | EVZ | GVZ | OVX | VIXIE | VSTOXX |
|  |  |  |  |  |  |  |  |
|  |  |  |  |  |  |  |  |
| CBI1(-1) | -0.043870 | 0.307255 | -1016.563 | 30.77759 | 90.76377 | 394.5125 | -23.51475 |
|  | (0.14176) | (0.15819) | (883.654) | (48.1980) | (162.712) | (172.400) | (94.1830) |
|  | [-0.30947] | [ 1.94226] | [-1.15041] | [ 0.63856] | [ 0.55782] | [ 2.28835] | [-0.24967] |
|  |  |  |  |  |  |  |  |
| CBI1(-2) | 0.151253 | 0.232499 | -414.7435 | 14.60338 | 33.26408 | 404.1130 | -10.96881 |
|  | (0.13374) | (0.14925) | (833.675) | (45.4720) | (153.510) | (162.649) | (88.8561) |
|  | [ 1.13093] | [ 1.55781] | [-0.49749] | [ 0.32115] | [ 0.21669] | [ 2.48457] | [-0.12344] |
|  |  |  |  |  |  |  |  |
| GBI1(-1) | 0.071282 | -0.255502 | 855.1589 | -36.32682 | -41.74348 | -348.2880 | -8.469477 |
|  | (0.12589) | (0.14048) | (784.700) | (42.8007) | (144.492) | (153.094) | (83.6362) |
|  | [ 0.56624] | [-1.81878] | [ 1.08979] | [-0.84874] | [-0.28890] | [-2.27499] | [-0.10127] |
|  |  |  |  |  |  |  |  |
| GBI1(-2) | -0.092182 | -0.169169 | 439.1709 | 0.217718 | -4.058746 | -352.0911 | 25.42593 |
|  | (0.12058) | (0.13456) | (751.640) | (40.9975) | (138.404) | (146.644) | (80.1125) |
|  | [-0.76447] | [-1.25719] | [ 0.58428] | [ 0.00531] | [-0.02933] | [-2.40099] | [ 0.31738] |
|  |  |  |  |  |  |  |  |
| EVZ(-1) | -8.16E-08 | 2.53E-07 | 0.001163 | 0.000446 | 0.000578 | 0.005031 | 0.003866 |
|  | (4.6E-06) | (5.1E-06) | (0.02856) | (0.00156) | (0.00526) | (0.00557) | (0.00304) |
|  | [-0.01781] | [ 0.04941] | [ 0.04071] | [ 0.28602] | [ 0.10990] | [ 0.90278] | [ 1.26978] |
|  |  |  |  |  |  |  |  |
| EVZ(-2) | -8.52E-07 | 3.31E-07 | -0.001277 | -0.000985 | -0.007794 | -0.004305 | -0.004771 |
|  | (4.6E-06) | (5.1E-06) | (0.02856) | (0.00156) | (0.00526) | (0.00557) | (0.00304) |
|  | [-0.18601] | [ 0.06466] | [-0.04472] | [-0.63222] | [-1.48218] | [-0.77265] | [-1.56741] |
|  |  |  |  |  |  |  |  |
| GVZ(-1) | -7.08E-05 | -5.09E-05 | -0.131393 | 0.873264 | 0.103460 | 0.077758 | 0.143047 |
|  | (9.0E-05) | (0.00010) | (0.56302) | (0.03071) | (0.10367) | (0.10984) | (0.06001) |
|  | [-0.78331] | [-0.50493] | [-0.23337] | [ 28.4365] | [ 0.99795] | [ 0.70789] | [ 2.38379] |
|  |  |  |  |  |  |  |  |
| GVZ(-2) | 0.000109 | 9.42E-05 | 0.186563 | 0.069518 | -0.118249 | -0.124209 | -0.116482 |
|  | (9.0E-05) | (0.00010) | (0.56314) | (0.03072) | (0.10369) | (0.10987) | (0.06002) |
|  | [ 1.20260] | [ 0.93394] | [ 0.33129] | [ 2.26328] | [-1.14036] | [-1.13054] | [-1.94068] |
|  |  |  |  |  |  |  |  |
| OVX(-1) | 1.30E-05 | 1.92E-05 | -0.515782 | -0.010566 | 0.798073 | 0.090766 | 0.015270 |
|  | (2.7E-05) | (3.0E-05) | (0.16695) | (0.00911) | (0.03074) | (0.03257) | (0.01779) |
|  | [ 0.48369] | [ 0.64158] | [-3.08940] | [-1.16029] | [ 25.9605] | [ 2.78662] | [ 0.85813] |
|  |  |  |  |  |  |  |  |
| OVX(-2) | -7.94E-06 | -9.87E-06 | 0.504180 | 0.004912 | 0.113355 | -0.093065 | -0.006564 |
|  | (2.6E-05) | (2.9E-05) | (0.16337) | (0.00891) | (0.03008) | (0.03187) | (0.01741) |
|  | [-0.30294] | [-0.33758] | [ 3.08605] | [ 0.55121] | [ 3.76806] | [-2.91978] | [-0.37697] |
|  |  |  |  |  |  |  |  |
| VIXIE(-1) | -7.37E-05 | -4.04E-05 | 0.065589 | 0.038348 | 0.096408 | 1.198969 | 0.064414 |
|  | (3.3E-05) | (3.7E-05) | (0.20457) | (0.01116) | (0.03767) | (0.03991) | (0.02180) |
|  | [-2.24719] | [-1.10306] | [ 0.32062] | [ 3.43678] | [ 2.55934] | [ 30.0405] | [ 2.95423] |
|  |  |  |  |  |  |  |  |
| VIXIE(-2) | 7.45E-05 | 4.05E-05 | 0.010335 | -0.039533 | -0.089682 | -0.216621 | -0.062789 |
|  | (3.3E-05) | (3.6E-05) | (0.20323) | (0.01109) | (0.03742) | (0.03965) | (0.02166) |
|  | [ 2.28430] | [ 1.11355] | [ 0.05085] | [-3.56629] | [-2.39650] | [-5.46328] | [-2.89868] |
|  |  |  |  |  |  |  |  |
| VSTOXX(-1) | -6.38E-05 | -8.15E-05 | 0.671748 | -0.008128 | 0.087539 | -0.026624 | 0.797874 |
|  | (6.0E-05) | (6.7E-05) | (0.37589) | (0.02050) | (0.06921) | (0.07333) | (0.04006) |
|  | [-1.05780] | [-1.21049] | [ 1.78711] | [-0.39642] | [ 1.26476] | [-0.36305] | [ 19.9154] |
|  |  |  |  |  |  |  |  |
| VSTOXX(-2) | 1.39E-05 | 2.12E-05 | -0.716510 | 0.033949 | 0.017705 | 0.044603 | 0.136269 |
|  | (5.9E-05) | (6.6E-05) | (0.37076) | (0.02022) | (0.06827) | (0.07234) | (0.03952) |
|  | [ 0.23301] | [ 0.31943] | [-1.93254] | [ 1.67876] | [ 0.25934] | [ 0.61661] | [ 3.44835] |
|  |  |  |  |  |  |  |  |
| C | 0.000185 | 0.000115 | 5.538078 | 0.711587 | 1.387361 | 1.184904 | 0.502253 |
|  | (0.00041) | (0.00046) | (2.55977) | (0.13962) | (0.47135) | (0.49941) | (0.27283) |
|  | [ 0.45165] | [ 0.25066] | [ 2.16351] | [ 5.09659] | [ 2.94340] | [ 2.37261] | [ 1.84090] |
|  |  |  |  |  |  |  |  |
|  |  |  |  |  |  |  |  |
| R-squared | 0.028753 | 0.024057 | 0.018359 | 0.928060 | 0.936766 | 0.973800 | 0.927162 |
| Adj. R-squared | 0.017589 | 0.012840 | 0.007076 | 0.927233 | 0.936040 | 0.973499 | 0.926324 |
| Sum sq. resids | 0.007084 | 0.008821 | 275240.1 | 818.8531 | 9332.304 | 10476.65 | 3126.745 |
| S.E. equation | 0.002412 | 0.002691 | 15.03253 | 0.819935 | 2.768030 | 2.932835 | 1.602222 |
| F-statistic | 2.575585 | 2.144586 | 1.627136 | 1122.334 | 1288.850 | 3233.568 | 1107.427 |
| Log likelihood | 5689.858 | 5554.613 | -5083.703 | -1497.217 | -2997.367 | -3068.675 | -2323.231 |
| Akaike AIC | -9.204960 | -8.985585 | 8.270402 | 2.452907 | 4.886240 | 5.001907 | 3.792750 |
| Schwarz SC | -9.142707 | -8.923332 | 8.332655 | 2.515160 | 4.948493 | 5.064160 | 3.855003 |
| Mean dependent | 1.69E-05 | -8.16E-06 | 8.212206 | 17.08726 | 40.92416 | 41.69676 | 21.04025 |
| S.D. dependent | 0.002433 | 0.002709 | 15.08600 | 3.039563 | 10.94498 | 18.01575 | 5.902841 |
|  |  |  |  |  |  |  |  |
|  |  |  |  |  |  |  |  |
| Determinant resid covariance (dof adj.) | | 1.66E-08 |  |  |  |  |  |
| Determinant resid covariance | | 1.52E-08 |  |  |  |  |  |
| Log likelihood | | -1150.605 |  |  |  |  |  |
| Akaike information criterion | | 2.036667 |  |  |  |  |  |
| Schwarz criterion | | 2.472439 |  |  |  |  |  |
|  |  |  |  |  |  |  |  |
|  |  |  |  |  |  |  |  |

R-squared for GVZ is very high (0.928), meaning the lags explain most of the variation in GVZ.

Impulse Response
