# Supplementary material
Source: Research Square preprint supplement (doi:10.21203/rs.3.rs-9481480/v1)
Supplement: Supplementary file 3 [file d54e8b930991e8d8d343ac0c.xlsx]

## Sheet: CBOE Euro Currency Volatility H
Date	Sütun1	Sütun2	Sütun3	Tarih	Price	Open	High	Low	Vol.	Change %
12/31/2024	31	12	2024	2024-12-31	801	801	801	801		0
01/24/2025	24	1	2025	2025-01-24	751	723	821	647		3.87
01/23/2025	23	1	2025	2025-01-23	723	716	798	716		0.98
01/22/2025	22	1	2025	2025-01-22	716	717	732	596		-0.14
01/21/2025	21	1	2025	2025-01-21	717	693	963	677		3.46
01/17/2025	17	1	2025	2025-01-17	693	475	695	475		45.89
01/16/2025	16	1	2025	2025-01-16	475	556	556	419		-14.57
01/15/2025	15	1	2025	2025-01-15	556	621	621	556		-10.47
01/14/2025	14	1	2025	2025-01-14	621	544	767	544		14.15
01/13/2025	13	1	2025	2025-01-13	544	767	767	510		-29.07
01/10/2025	10	1	2025	2025-01-10	767	807	807	767		-4.96
01/08/2025	8	1	2025	2025-01-08	807	807	807	807		0
01/07/2025	7	1	2025	2025-01-07	807	761	810	761		6.04
01/06/2025	6	1	2025	2025-01-06	761	1016	1016	761		-25.1
01/03/2025	3	1	2025	2025-01-03	1016	801	1027	801		26.84
01/02/2025	2	1	2025	2025-01-02	801	801	801	801		0
12/30/2024	30	12	2024	2024-12-30	801	997	997	801		-19.66
12/27/2024	27	12	2024	2024-12-27	997	997	997	997		0
12/26/2024	26	12	2024	2024-12-26	997	997	997	997		0
12/24/2024	24	12	2024	2024-12-24	997	997	997	997		0
12/23/2024	23	12	2024	2024-12-23	997	997	997	997		0
12/20/2024	20	12	2024	2024-12-20	997	997	997	997		0
12/19/2024	19	12	2024	2024-12-19	997	997	997	997		0
12/18/2024	18	12	2024	2024-12-18	997	743	1032	740		34.19
12/17/2024	17	12	2024	2024-12-17	743	736	779	725		0.95
12/16/2024	16	12	2024	2024-12-16	736	629	744	629		17.01
12/13/2024	13	12	2024	2024-12-13	629	629	629	629		0
12/12/2024	12	12	2024	2024-12-12	629	629	629	629		0
12/11/2024	11	12	2024	2024-12-11	629	831	831	622		-24.31
12/10/2024	10	12	2024	2024-12-10	831	831	831	831		0
12/09/2024	9	12	2024	2024-12-09	831	831	831	831		0
12/06/2024	6	12	2024	2024-12-06	831	831	831	831		0
12/05/2024	5	12	2024	2024-12-05	831	831	831	831		0
12/04/2024	4	12	2024	2024-12-04	831	831	831	831		0
12/03/2024	3	12	2024	2024-12-03	831	835	858	811		-0.48
12/02/2024	2	12	2024	2024-12-02	835	815	843	815		2.45
11/29/2024	29	11	2024	2024-11-29	815	815	815	815		0
11/27/2024	27	11	2024	2024-11-27	815	875	880	739		-6.86
11/26/2024	26	11	2024	2024-11-26	875	875	875	875		0
11/25/2024	25	11	2024	2024-11-25	875	733	971	733		19.37
11/22/2024	22	11	2024	2024-11-22	733	579	801	579		26.6
11/21/2024	21	11	2024	2024-11-21	579	579	579	579		0
11/20/2024	20	11	2024	2024-11-20	579	579	579	579		0
11/19/2024	19	11	2024	2024-11-19	579	579	579	579		0
11/18/2024	18	11	2024	2024-11-18	579	751	751	579		-22.9
11/15/2024	15	11	2024	2024-11-15	751	625	777	625		20.16
11/14/2024	14	11	2024	2024-11-14	625	642	642	625		-2.65
11/13/2024	13	11	2024	2024-11-13	642	642	642	642		0
11/12/2024	12	11	2024	2024-11-12	642	563	646	563		14.03
11/11/2024	11	11	2024	2024-11-11	563	966	966	563		-41.72
11/08/2024	8	11	2024	2024-11-08	966	966	966	966		0
11/07/2024	7	11	2024	2024-11-07	966	966	966	966		0
11/06/2024	6	11	2024	2024-11-06	966	966	966	966		0
11/05/2024	5	11	2024	2024-11-05	966	887	1021	872		8.91
11/04/2024	4	11	2024	2024-11-04	887	825	894	825		7.52
11/01/2024	1	11	2024	2024-11-01	825	784	880	715		5.23
10/31/2024	31	10	2024	2024-10-31	784	786	881	783		-0.25
10/30/2024	30	10	2024	2024-10-30	786	798	798	758		-1.5
10/29/2024	29	10	2024	2024-10-29	798	716	852	716		11.45
10/28/2024	28	10	2024	2024-10-28	716	829	829	672		-13.63
10/25/2024	25	10	2024	2024-10-25	829	845	860	734		-1.89
10/24/2024	24	10	2024	2024-10-24	845	1093	1093	818		-22.69
10/23/2024	23	10	2024	2024-10-23	1093	822	1131	679		32.97
10/22/2024	22	10	2024	2024-10-22	822	776	941	776		5.93
10/21/2024	21	10	2024	2024-10-21	776	643	950	643		20.68
10/18/2024	18	10	2024	2024-10-18	643	732	732	622		-12.16
10/17/2024	17	10	2024	2024-10-17	732	887	887	715		-17.47
10/16/2024	16	10	2024	2024-10-16	887	719	887	693		23.37
10/15/2024	15	10	2024	2024-10-15	719	801	966	719		-10.24
10/14/2024	14	10	2024	2024-10-14	801	748	968	748		7.09
10/11/2024	11	10	2024	2024-10-11	748	748	748	748		0
10/10/2024	10	10	2024	2024-10-10	748	748	748	748		0
10/09/2024	9	10	2024	2024-10-09	748	748	748	748		0
10/08/2024	8	10	2024	2024-10-08	748	748	748	748		0
10/07/2024	7	10	2024	2024-10-07	748	748	748	748		0
10/04/2024	4	10	2024	2024-10-04	748	748	748	748		0
10/03/2024	3	10	2024	2024-10-03	748	748	748	748		0
10/02/2024	2	10	2024	2024-10-02	748	717	795	717		4.32
10/01/2024	1	10	2024	2024-10-01	717	712	799	708		0.7
09/30/2024	30	9	2024	2024-09-30	712	670	815	670		6.27
09/27/2024	27	9	2024	2024-09-27	670	590	783	590		13.56
09/26/2024	26	9	2024	2024-09-26	590	733	733	521		-19.51
09/25/2024	25	9	2024	2024-09-25	733	648	900	556		13.12
09/24/2024	24	9	2024	2024-09-24	648	628	648	628		3.18
09/23/2024	23	9	2024	2024-09-23	628	628	628	628		0
09/20/2024	20	9	2024	2024-09-20	628	659	817	585		-0.79
09/19/2024	19	9	2024	2024-09-19	633	633	633	633		0
09/18/2024	18	9	2024	2024-09-18	633	663	785	536		-28.07
09/17/2024	17	9	2024	2024-09-17	880	629	1009	611		-23.68
09/16/2024	16	9	2024	2024-09-16	1153	1892	2482	1136		89.95
09/13/2024	13	9	2024	2024-09-13	607	607	607	607		0
09/12/2024	12	9	2024	2024-09-12	607	607	607	607		0
09/11/2024	11	9	2024	2024-09-11	607	607	607	607		0
09/10/2024	10	9	2024	2024-09-10	607	735	735	563		-17.41
09/09/2024	9	9	2024	2024-09-09	735	630	797	630		16.67
09/06/2024	6	9	2024	2024-09-06	630	678	795	624		-1.87
09/05/2024	5	9	2024	2024-09-05	642	676	964	642		-28.43
09/04/2024	4	9	2024	2024-09-04	897	825	1000	600		8.73
09/03/2024	3	9	2024	2024-09-03	825	707	940	693		10.15
08/30/2024	30	8	2024	2024-08-30	749	808	863	686		-11.78
08/29/2024	29	8	2024	2024-08-29	849	717	865	683		18.41
08/28/2024	28	8	2024	2024-08-28	717	876	876	663		-2.45
08/27/2024	27	8	2024	2024-08-27	735	761	1214	701		-3.42
08/26/2024	26	8	2024	2024-08-26	761	760	796	680		7.49
08/23/2024	23	8	2024	2024-08-23	708	624	827	592		11.15
08/22/2024	22	8	2024	2024-08-22	637	691	835	637		-7.81
08/21/2024	21	8	2024	2024-08-21	691	834	869	649		-11.41
08/20/2024	20	8	2024	2024-08-20	780	742	972	624		5.12
08/19/2024	19	8	2024	2024-08-19	742	828	910	653		-10.39
08/16/2024	16	8	2024	2024-08-16	828	1011	1097	744		-26.27
08/15/2024	15	8	2024	2024-08-15	1123	1123	1123	1123		0
08/14/2024	14	8	2024	2024-08-14	1123	1045	1123	604		7.46
08/13/2024	13	8	2024	2024-08-13	1045	1758	1758	997		-40.56
08/12/2024	12	8	2024	2024-08-12	1758	1267	1846	1267		38.75
08/09/2024	9	8	2024	2024-08-09	1267	1267	1267	1267		0
08/08/2024	8	8	2024	2024-08-08	1267	1267	1267	1267		0
08/07/2024	7	8	2024	2024-08-07	1267	1267	1267	1267		0
08/06/2024	6	8	2024	2024-08-06	1267	1688	1688	1265		-24.94
08/05/2024	5	8	2024	2024-08-05	1688	885	1703	885		90.73
08/02/2024	2	8	2024	2024-08-02	885	821	966	815		-11.5
08/01/2024	1	8	2024	2024-08-01	1000	931	1300	806		7.41
07/31/2024	31	7	2024	2024-07-31	931	852	1078	770		14.09
07/30/2024	30	7	2024	2024-07-30	816	638	1258	638		27.9
07/29/2024	29	7	2024	2024-07-29	638	743	915	638		-14.13
07/26/2024	26	7	2024	2024-07-26	743	883	1370	743		-15.86
07/25/2024	25	7	2024	2024-07-25	883	846	1283	846		4.37
07/24/2024	24	7	2024	2024-07-24	846	721	1103	721		17.34
07/23/2024	23	7	2024	2024-07-23	721	978	978	685		-26.28
07/22/2024	22	7	2024	2024-07-22	978	885	1499	885		10.51
07/19/2024	19	7	2024	2024-07-19	885	883	1213	643		-5.04
07/18/2024	18	7	2024	2024-07-18	932	1001	1019	761		34.1
07/17/2024	17	7	2024	2024-07-17	695	1138	1138	651		-38.93
07/16/2024	16	7	2024	2024-07-16	1138	650	1238	650		75.08
07/15/2024	15	7	2024	2024-07-15	650	1053	1369	650		-38.27
07/12/2024	12	7	2024	2024-07-12	1053	889	1668	741		18.45
07/11/2024	11	7	2024	2024-07-11	889	901	1110	597		-1.33
07/10/2024	10	7	2024	2024-07-10	901	957	1170	770		-5.85
07/09/2024	9	7	2024	2024-07-09	957	1026	1110	820		-6.73
07/08/2024	8	7	2024	2024-07-08	1026	823	1047	763		24.67
07/05/2024	5	7	2024	2024-07-05	823	997	1057	725		-17.45
07/03/2024	3	7	2024	2024-07-03	997	1174	1174	848		-15.08
07/02/2024	2	7	2024	2024-07-02	1174	965	1334	813		21.66
07/01/2024	1	7	2024	2024-07-01	965	813	1037	762		2.66
06/28/2024	28	6	2024	2024-06-28	940	832	1077	770		12.98
06/27/2024	27	6	2024	2024-06-27	832	961	1351	798		-13.42
06/26/2024	26	6	2024	2024-06-26	961	950	1119	877		1.16
06/25/2024	25	6	2024	2024-06-25	950	994	1211	837		1.39
06/24/2024	24	6	2024	2024-06-24	937	922	1266	808		-4.58
06/21/2024	21	6	2024	2024-06-21	982	1049	1136	866		-6.39
06/20/2024	20	6	2024	2024-06-20	1049	951	1049	907		10.3
06/18/2024	18	6	2024	2024-06-18	951	1252	1269	808		11.1
06/17/2024	17	6	2024	2024-06-17	856	983	1047	808		6.6
06/14/2024	14	6	2024	2024-06-14	803	700	996	700		14.71
06/13/2024	13	6	2024	2024-06-13	700	700	700	700		0
06/12/2024	12	6	2024	2024-06-12	700	684	700	684		2.34
06/11/2024	11	6	2024	2024-06-11	684	663	717	631		3.17
06/10/2024	10	6	2024	2024-06-10	663	597	709	559		11.06
06/07/2024	7	6	2024	2024-06-07	597	578	802	578		3.29
06/06/2024	6	6	2024	2024-06-06	578	659	659	550		-12.29
06/05/2024	5	6	2024	2024-06-05	659	661	807	543		-0.3
06/04/2024	4	6	2024	2024-06-04	661	713	734	544		-7.29
06/03/2024	3	6	2024	2024-06-03	713	613	903	538		16.31
05/31/2024	31	5	2024	2024-05-31	613	635	766	521		-3.46
05/30/2024	30	5	2024	2024-05-30	635	924	924	549		-31.28
05/29/2024	29	5	2024	2024-05-29	924	553	993	535		67.09
05/28/2024	28	5	2024	2024-05-28	553	596	717	549		-7.21
05/24/2024	24	5	2024	2024-05-24	596	645	775	494		-7.6
05/23/2024	23	5	2024	2024-05-23	645	565	962	488		14.16
05/22/2024	22	5	2024	2024-05-22	565	606	688	523		10.14
05/21/2024	21	5	2024	2024-05-21	513	808	808	502		-29.14
05/20/2024	20	5	2024	2024-05-20	724	631	1189	557		14.74
05/17/2024	17	5	2024	2024-05-17	631	690	690	474		24.46
05/16/2024	16	5	2024	2024-05-16	507	507	507	507		0
05/15/2024	15	5	2024	2024-05-15	507	666	672	390		-0.59
05/14/2024	14	5	2024	2024-05-14	510	718	718	273		-10.84
05/13/2024	13	5	2024	2024-05-13	572	553	633	502		-14.63
05/10/2024	10	5	2024	2024-05-10	670	670	670	670		0
05/09/2024	9	5	2024	2024-05-09	670	670	670	670		0
05/08/2024	8	5	2024	2024-05-08	670	670	670	670		0
05/07/2024	7	5	2024	2024-05-07	670	670	670	670		0
05/06/2024	6	5	2024	2024-05-06	670	670	670	670		0
05/03/2024	3	5	2024	2024-05-03	670	670	670	670		0
05/02/2024	2	5	2024	2024-05-02	670	659	877	621		1.67
05/01/2024	1	5	2024	2024-05-01	659	711	761	637		-7.31
04/30/2024	30	4	2024	2024-04-30	711	635	751	614		12.15
04/29/2024	29	4	2024	2024-04-29	634	665	739	634		-4.66
04/26/2024	26	4	2024	2024-04-26	665	672	725	611		-1.04
04/25/2024	25	4	2024	2024-04-25	672	646	813	646		4.02
04/24/2024	24	4	2024	2024-04-24	646	645	817	612		0.16
04/23/2024	23	4	2024	2024-04-23	645	655	1113	618		-1.53
04/22/2024	22	4	2024	2024-04-22	655	708	708	649		-2.82
04/19/2024	19	4	2024	2024-04-19	674	717	901	655		-3.02
04/18/2024	18	4	2024	2024-04-18	695	691	931	667		-2.52
04/17/2024	17	4	2024	2024-04-17	713	1080	1120	673		-24.31
04/16/2024	16	4	2024	2024-04-16	942	736	1202	638		32.3
04/15/2024	15	4	2024	2024-04-15	712	738	770	623		-4.56
04/12/2024	12	4	2024	2024-04-12	746	653	759	653		14.24
04/11/2024	11	4	2024	2024-04-11	653	653	653	653		0
04/10/2024	10	4	2024	2024-04-10	653	653	653	653		0
04/09/2024	9	4	2024	2024-04-09	653	653	653	653		0
04/08/2024	8	4	2024	2024-04-08	653	653	653	653		0
04/05/2024	5	4	2024	2024-04-05	653	622	871	600		4.98
04/04/2024	4	4	2024	2024-04-04	622	649	697	572		-4.16
04/03/2024	3	4	2024	2024-04-03	649	630	747	599		3.02
04/02/2024	2	4	2024	2024-04-02	630	632	743	603		3.45
04/01/2024	1	4	2024	2024-04-01	609	556	684	556		9.53
03/28/2024	28	3	2024	2024-03-28	556	597	597	556		-6.87
03/27/2024	27	3	2024	2024-03-27	597	587	697	551		12.85
03/26/2024	26	3	2024	2024-03-26	529	536	815	515		-1.31
03/25/2024	25	3	2024	2024-03-25	536	589	598	536		-12.56
03/22/2024	22	3	2024	2024-03-22	613	535	717	535		14.58
03/21/2024	21	3	2024	2024-03-21	535	498	655	498		7.43
03/20/2024	20	3	2024	2024-03-20	498	637	689	486		-10.11
03/19/2024	19	3	2024	2024-03-19	554	597	598	547		2.21
03/18/2024	18	3	2024	2024-03-18	542	577	689	512		0.37
03/15/2024	15	3	2024	2024-03-15	540	597	717	421		-16.54
03/14/2024	14	3	2024	2024-03-14	647	579	658	255		11.74
03/13/2024	13	3	2024	2024-03-13	579	552	957	454		4.89
03/12/2024	12	3	2024	2024-03-12	552	972	972	422		-8.61
03/11/2024	11	3	2024	2024-03-11	604	708	731	539		-6.36
03/08/2024	8	3	2024	2024-03-08	645	689	689	629		-6.39
03/07/2024	7	3	2024	2024-03-07	689	650	795	648		6
03/06/2024	6	3	2024	2024-03-06	650	650	650	650		0
03/05/2024	5	3	2024	2024-03-05	650	778	825	649		0
03/04/2024	4	3	2024	2024-03-04	650	688	795	622		1.09
03/01/2024	1	3	2024	2024-03-01	643	622	808	609		3.38
02/29/2024	29	2	2024	2024-02-29	622	647	662	608		-6.18
02/28/2024	28	2	2024	2024-02-28	663	630	751	616		6.25
02/27/2024	27	2	2024	2024-02-27	624	732	732	594		-5.88
02/26/2024	26	2	2024	2024-02-26	663	573	676	570		16.73
02/23/2024	23	2	2024	2024-02-23	568	577	657	561		-6.12
02/22/2024	22	2	2024	2024-02-22	605	596	631	585		1.51
02/21/2024	21	2	2024	2024-02-21	596	637	703	591		-6.44
02/20/2024	20	2	2024	2024-02-20	637	641	739	596		7.06
02/16/2024	16	2	2024	2024-02-16	595	619	655	567		-2.78
02/15/2024	15	2	2024	2024-02-15	612	627	671	612		-2.39
02/14/2024	14	2	2024	2024-02-14	627	616	676	588		0.97
02/13/2024	13	2	2024	2024-02-13	621	592	713	590		-1.11
02/12/2024	12	2	2024	2024-02-12	628	616	710	598		-8.59
02/09/2024	9	2	2024	2024-02-09	687	687	687	687		0
02/08/2024	8	2	2024	2024-02-08	687	687	687	687		0
02/07/2024	7	2	2024	2024-02-07	687	687	687	687		0
02/06/2024	6	2	2024	2024-02-06	687	668	732	665		0.73
02/05/2024	5	2	2024	2024-02-05	682	697	806	673		-2.15
02/02/2024	2	2	2024	2024-02-02	697	730	730	692		-4.52
02/01/2024	1	2	2024	2024-02-01	730	726	826	724		0.55
01/31/2024	31	1	2024	2024-01-31	726	825	937	694		-2.55
01/30/2024	30	1	2024	2024-01-30	745	739	1047	734		0.81
01/29/2024	29	1	2024	2024-01-29	739	798	798	734		5.27
01/26/2024	26	1	2024	2024-01-26	702	795	795	702		-2.09
01/25/2024	25	1	2024	2024-01-25	717	741	776	686		4.22
01/24/2024	24	1	2024	2024-01-24	688	680	865	652		1.18
01/23/2024	23	1	2024	2024-01-23	680	725	725	635		5.75
01/22/2024	22	1	2024	2024-01-22	643	686	686	615		-2.28
01/19/2024	19	1	2024	2024-01-19	658	690	747	630		-4.64
01/18/2024	18	1	2024	2024-01-18	690	630	727	612		0
01/17/2024	17	1	2024	2024-01-17	690	728	732	680		-1.15
01/16/2024	16	1	2024	2024-01-16	698	724	735	672		1.6
01/12/2024	12	1	2024	2024-01-12	687	687	687	687		0
01/11/2024	11	1	2024	2024-01-11	687	687	687	687		0
01/10/2024	10	1	2024	2024-01-10	687	678	715	675		1.33
01/09/2024	9	1	2024	2024-01-09	678	690	700	678		-1.74
01/08/2024	8	1	2024	2024-01-08	690	682	708	682		1.17
01/05/2024	5	1	2024	2024-01-05	682	709	915	667		-3.81
01/04/2024	4	1	2024	2024-01-04	709	771	778	707		-3.01
01/03/2024	3	1	2024	2024-01-03	731	796	918	731		-4.19
01/02/2024	2	1	2024	2024-01-02	763	771	929	739		4.09
12/29/2023	29	12	2023	2023-12-29	733	735	754	697		2.37
12/28/2023	28	12	2023	2023-12-28	716	723	729	688		3.17
12/27/2023	27	12	2023	2023-12-27	694	671	719	656		0.87
12/26/2023	26	12	2023	2023-12-26	688	740	740	652		6.01
12/22/2023	22	12	2023	2023-12-22	649	690	775	641		-3.71
12/21/2023	21	12	2023	2023-12-21	674	653	686	638		9.06
12/20/2023	20	12	2023	2023-12-20	618	637	795	587		-0.48
12/19/2023	19	12	2023	2023-12-19	621	584	667	565		-3.42
12/18/2023	18	12	2023	2023-12-18	643	598	875	574		-10.45
12/15/2023	15	12	2023	2023-12-15	718	684	876	610		4.82
12/14/2023	14	12	2023	2023-12-14	685	792	792	525		2.85
12/13/2023	13	12	2023	2023-12-13	666	655	702	448		-0.6
12/12/2023	12	12	2023	2023-12-12	670	710	725	603		-12.65
12/11/2023	11	12	2023	2023-12-11	767	709	815	616		7.57
12/08/2023	8	12	2023	2023-12-08	713	771	771	694		-5.94
12/07/2023	7	12	2023	2023-12-07	758	767	802	713		-6.3
12/06/2023	6	12	2023	2023-12-06	809	821	821	733		6.73
12/05/2023	5	12	2023	2023-12-05	758	742	983	710		2.16
12/04/2023	4	12	2023	2023-12-04	742	799	873	729		4.65
12/01/2023	1	12	2023	2023-12-01	709	740	774	689		0.14
11/30/2023	30	11	2023	2023-11-30	708	693	834	678		2.16
11/29/2023	29	11	2023	2023-11-29	693	703	716	671		-0.14
11/28/2023	28	11	2023	2023-11-28	694	707	723	654		4.99
11/27/2023	27	11	2023	2023-11-27	661	697	697	660		-1.34
11/24/2023	24	11	2023	2023-11-24	670	703	760	665		-2.9
11/22/2023	22	11	2023	2023-11-22	690	711	760	667		-0.43
11/21/2023	21	11	2023	2023-11-21	693	709	709	655		4.37
11/20/2023	20	11	2023	2023-11-20	664	655	681	654		-0.45
11/17/2023	17	11	2023	2023-11-17	667	656	682	629		1.68
11/16/2023	16	11	2023	2023-11-16	656	659	713	646		-1.35
11/15/2023	15	11	2023	2023-11-15	665	588	696	588		-6.34
11/14/2023	14	11	2023	2023-11-14	710	696	710	634		3.65
11/13/2023	13	11	2023	2023-11-13	685	627	700	627		0.74
11/10/2023	10	11	2023	2023-11-10	680	680	680	680		0
11/09/2023	9	11	2023	2023-11-09	680	697	697	677		-2.44
11/08/2023	8	11	2023	2023-11-08	697	697	697	697		0
11/07/2023	7	11	2023	2023-11-07	697	697	697	697		0
11/06/2023	6	11	2023	2023-11-06	697	726	726	683		0
11/03/2023	3	11	2023	2023-11-03	697	715	722	679		-2.52
11/02/2023	2	11	2023	2023-11-02	715	682	723	654		6.72
11/01/2023	1	11	2023	2023-11-01	670	721	835	656		-7.59
10/31/2023	31	10	2023	2023-10-31	725	694	735	690		-1.36
10/30/2023	30	10	2023	2023-10-30	735	743	743	715		2.65
10/27/2023	27	10	2023	2023-10-27	716	714	734	681		-0.83
10/26/2023	26	10	2023	2023-10-26	722	758	785	722		-4.62
10/25/2023	25	10	2023	2023-10-25	757	761	815	745		-0.53
10/24/2023	24	10	2023	2023-10-24	761	762	787	739		-2.19
10/23/2023	23	10	2023	2023-10-23	778	869	869	748		-3.71
10/20/2023	20	10	2023	2023-10-20	808	781	834	751		3.59
10/19/2023	19	10	2023	2023-10-19	780	745	806	691		-2.01
10/18/2023	18	10	2023	2023-10-18	796	820	820	762		6.56
10/17/2023	17	10	2023	2023-10-17	747	797	797	734		-0.66
10/16/2023	16	10	2023	2023-10-16	752	682	789	682		-3.59
10/13/2023	13	10	2023	2023-10-13	780	753	804	753		3.59
10/12/2023	12	10	2023	2023-10-12	753	753	753	753		0
10/11/2023	11	10	2023	2023-10-11	753	782	782	745		-3.71
10/10/2023	10	10	2023	2023-10-10	782	783	791	776		-0.13
10/09/2023	9	10	2023	2023-10-09	783	787	829	769		1.82
10/06/2023	6	10	2023	2023-10-06	769	792	792	761		-1.28
10/05/2023	5	10	2023	2023-10-05	779	810	839	761		-3.11
10/04/2023	4	10	2023	2023-10-04	804	850	942	783		-1.59
10/03/2023	3	10	2023	2023-10-03	817	858	1118	800		2.51
10/02/2023	2	10	2023	2023-10-02	797	819	1244	774		9.18
09/29/2023	29	9	2023	2023-09-29	730	781	897	705		-2.14
09/28/2023	28	9	2023	2023-09-28	746	760	769	746		-1.84
09/27/2023	27	9	2023	2023-09-27	760	769	807	744		4.83
09/26/2023	26	9	2023	2023-09-26	725	889	896	715		2.4
09/25/2023	25	9	2023	2023-09-25	708	733	757	699		3.96
09/22/2023	22	9	2023	2023-09-22	681	696	741	655		-6.07
09/21/2023	21	9	2023	2023-09-21	725	733	733	676		6.62
09/20/2023	20	9	2023	2023-09-20	680	741	949	648		-1.73
09/19/2023	19	9	2023	2023-09-19	692	709	709	671		2.52
09/18/2023	18	9	2023	2023-09-18	675	772	772	671		-2.46
09/15/2023	15	9	2023	2023-09-15	692	757	757	602		4.06
09/14/2023	14	9	2023	2023-09-14	665	648	695	584		-9.65
09/13/2023	13	9	2023	2023-09-13	736	797	797	721		2.36
09/12/2023	12	9	2023	2023-09-12	719	732	752	689		0.14
09/11/2023	11	9	2023	2023-09-11	718	732	743	671		-1.64
09/08/2023	8	9	2023	2023-09-08	730	760	760	725		-3.95
09/07/2023	7	9	2023	2023-09-07	760	760	760	760		0
09/06/2023	6	9	2023	2023-09-06	760	811	811	740		0.26
09/05/2023	5	9	2023	2023-09-05	758	825	844	757		5.57
09/01/2023	1	9	2023	2023-09-01	718	739	885	679		-1.64
08/31/2023	31	8	2023	2023-08-31	730	752	946	720		5.64
08/30/2023	30	8	2023	2023-08-30	691	730	730	677		-2.26
08/29/2023	29	8	2023	2023-08-29	707	728	821	692		-4.97
08/28/2023	28	8	2023	2023-08-28	744	734	788	724		1.36
08/25/2023	25	8	2023	2023-08-25	734	798	934	734		-4.43
08/24/2023	24	8	2023	2023-08-24	768	836	836	746		4.77
08/23/2023	23	8	2023	2023-08-23	733	750	1223	707		-0.27
08/22/2023	22	8	2023	2023-08-22	735	777	777	724		2.51
08/21/2023	21	8	2023	2023-08-21	717	785	788	714		-1.78
08/18/2023	18	8	2023	2023-08-18	730	763	766	716		1.25
08/17/2023	17	8	2023	2023-08-17	721	784	784	708		1.84
08/16/2023	16	8	2023	2023-08-16	708	772	772	682		0.43
08/15/2023	15	8	2023	2023-08-15	705	713	767	688		-1.81
08/14/2023	14	8	2023	2023-08-14	718	763	763	682		4.51
08/11/2023	11	8	2023	2023-08-11	687	687	687	687		0
08/10/2023	10	8	2023	2023-08-10	687	687	687	687		0
08/09/2023	9	8	2023	2023-08-09	687	687	687	687		0
08/08/2023	8	8	2023	2023-08-08	687	771	775	680		-3.1
08/07/2023	7	8	2023	2023-08-07	709	691	717	691		2.6
08/04/2023	4	8	2023	2023-08-04	691	739	739	689		-6.5
08/03/2023	3	8	2023	2023-08-03	739	749	863	706		1.65
08/02/2023	2	8	2023	2023-08-02	727	710	745	710		2.39
08/01/2023	1	8	2023	2023-08-01	710	722	847	707		-3.01
07/31/2023	31	7	2023	2023-07-31	732	758	758	722		2.81
07/28/2023	28	7	2023	2023-07-28	712	749	749	683		-2.86
07/27/2023	27	7	2023	2023-07-27	733	758	758	712		3.24
07/26/2023	26	7	2023	2023-07-26	710	820	978	708		-2.61
07/25/2023	25	7	2023	2023-07-25	729	738	744	691		-1.22
07/24/2023	24	7	2023	2023-07-24	738	754	835	716		6.49
07/21/2023	21	7	2023	2023-07-21	693	729	735	679		-3.62
07/20/2023	20	7	2023	2023-07-20	719	808	808	687		3.75
07/19/2023	19	7	2023	2023-07-19	693	817	817	686		-2.26
07/18/2023	18	7	2023	2023-07-18	709	703	734	695		0.85
07/17/2023	17	7	2023	2023-07-17	703	639	739	639		3.99
07/14/2023	14	7	2023	2023-07-14	676	676	676	676		0
07/13/2023	13	7	2023	2023-07-13	676	676	676	676		0
07/12/2023	12	7	2023	2023-07-12	676	652	682	643		1.35
07/11/2023	11	7	2023	2023-07-11	667	667	667	667		0
07/10/2023	10	7	2023	2023-07-10	667	658	680	658		1.37
07/07/2023	7	7	2023	2023-07-07	658	697	697	648		-5.6
07/06/2023	6	7	2023	2023-07-06	697	697	731	682		-9.48
07/05/2023	5	7	2023	2023-07-05	770	672	770	655		14.24
07/03/2023	3	7	2023	2023-07-03	674	664	696	656		1.51
06/30/2023	30	6	2023	2023-06-30	664	666	698	639		-0.3
06/29/2023	29	6	2023	2023-06-29	666	730	730	666		-0.89
06/28/2023	28	6	2023	2023-06-28	672	729	729	662		1.97
06/27/2023	27	6	2023	2023-06-27	659	671	675	625		-0.75
06/26/2023	26	6	2023	2023-06-26	664	740	740	645		10.3
06/23/2023	23	6	2023	2023-06-23	602	640	796	598		0.33
06/22/2023	22	6	2023	2023-06-22	600	613	641	564		-2.12
06/21/2023	21	6	2023	2023-06-21	613	602	647	583		-2.23
06/20/2023	20	6	2023	2023-06-20	627	690	690	615		5.03
06/16/2023	16	6	2023	2023-06-16	597	613	661	556		-14.22
06/15/2023	15	6	2023	2023-06-15	696	679	699	595		14.66
06/14/2023	14	6	2023	2023-06-14	607	599	1112	553		-5.6
06/13/2023	13	6	2023	2023-06-13	643	669	698	610		-4.32
06/12/2023	12	6	2023	2023-06-12	672	695	695	630		-4.27
06/09/2023	9	6	2023	2023-06-09	702	702	702	702		0
06/08/2023	8	6	2023	2023-06-08	702	686	702	686		2.33
06/07/2023	7	6	2023	2023-06-07	686	706	714	682		-2.83
06/06/2023	6	6	2023	2023-06-06	706	706	706	706		0
06/05/2023	5	6	2023	2023-06-05	706	691	788	691		2.17
06/02/2023	2	6	2023	2023-06-02	691	708	719	681		-4.03
06/01/2023	1	6	2023	2023-06-01	720	767	826	708		-6.13
05/31/2023	31	5	2023	2023-05-31	767	754	798	732		1.72
05/30/2023	30	5	2023	2023-05-30	754	764	833	737		0.13
05/26/2023	26	5	2023	2023-05-26	753	785	803	748		-2.71
05/25/2023	25	5	2023	2023-05-25	774	798	804	755		-0.64
05/24/2023	24	5	2023	2023-05-24	779	767	821	730		-1.52
05/23/2023	23	5	2023	2023-05-23	791	768	879	731		4.91
05/22/2023	22	5	2023	2023-05-22	754	755	802	718		3.01
05/19/2023	19	5	2023	2023-05-19	732	689	810	673		0
05/18/2023	18	5	2023	2023-05-18	732	703	748	693		-2.01
05/17/2023	17	5	2023	2023-05-17	747	806	817	729		4.04
05/16/2023	16	5	2023	2023-05-16	718	796	796	714		-7.59
05/15/2023	15	5	2023	2023-05-15	777	726	784	726		-2.63
05/12/2023	12	5	2023	2023-05-12	798	798	798	798		0
05/11/2023	11	5	2023	2023-05-11	798	798	798	798		0
05/10/2023	10	5	2023	2023-05-10	798	798	798	798		0
05/09/2023	9	5	2023	2023-05-09	798	800	828	781		-0.25
05/08/2023	8	5	2023	2023-05-08	800	800	804	793		0
05/05/2023	5	5	2023	2023-05-05	800	853	870	784		-6.21
05/04/2023	4	5	2023	2023-05-04	853	854	876	837		-0.12
05/03/2023	3	5	2023	2023-05-03	854	875	1014	826		0.23
05/02/2023	2	5	2023	2023-05-02	852	873	917	801		1.67
05/01/2023	1	5	2023	2023-05-01	838	891	899	814		4.23
04/28/2023	28	4	2023	2023-04-28	804	870	987	793		-4.06
04/27/2023	27	4	2023	2023-04-27	838	866	906	831		-3.23
04/26/2023	26	4	2023	2023-04-26	866	825	951	824		6.26
04/25/2023	25	4	2023	2023-04-25	815	844	857	791		4.49
04/24/2023	24	4	2023	2023-04-24	780	765	821	765		-1.39
04/21/2023	21	4	2023	2023-04-21	791	802	1067	781		-5.04
04/20/2023	20	4	2023	2023-04-20	833	845	897	815		4.52
04/19/2023	19	4	2023	2023-04-19	797	819	838	782		2.71
04/18/2023	18	4	2023	2023-04-18	776	731	801	731		0.13
04/17/2023	17	4	2023	2023-04-17	775	750	841	743		0.52
04/14/2023	14	4	2023	2023-04-14	771	798	798	771		-3.38
04/13/2023	13	4	2023	2023-04-13	798	809	875	787		-1.36
04/12/2023	12	4	2023	2023-04-12	809	837	837	780		-3.35
04/11/2023	11	4	2023	2023-04-11	837	871	871	832		-3.9
04/10/2023	10	4	2023	2023-04-10	871	943	943	866		0
04/06/2023	6	4	2023	2023-04-06	871	1034	1034	859		-0.68
04/05/2023	5	4	2023	2023-04-05	877	926	1138	802		1.39
04/04/2023	4	4	2023	2023-04-04	865	1093	1240	863		0.82
04/03/2023	3	4	2023	2023-04-03	858	903	909	838		-5.71
03/31/2023	31	3	2023	2023-03-31	910	808	1077	808		-4.71
03/30/2023	30	3	2023	2023-03-30	955	881	978	879		7.06
03/29/2023	29	3	2023	2023-03-29	892	1098	1098	882		-4.19
03/28/2023	28	3	2023	2023-03-28	931	1041	1084	913		-1.06
03/27/2023	27	3	2023	2023-03-27	941	1116	1116	935		-2.18
03/24/2023	24	3	2023	2023-03-24	962	1068	1275	948		3.44
03/23/2023	23	3	2023	2023-03-23	930	926	953	865		-2
03/22/2023	22	3	2023	2023-03-22	949	987	1354	872		4.06
03/21/2023	21	3	2023	2023-03-21	912	966	1000	889		-4.9
03/20/2023	20	3	2023	2023-03-20	959	958	1020	958		1.05
03/17/2023	17	3	2023	2023-03-17	949	850	985	811		1.28
03/16/2023	16	3	2023	2023-03-16	937	979	991	780		-4.29
03/15/2023	15	3	2023	2023-03-15	979	856	1083	856		14.37
03/14/2023	14	3	2023	2023-03-14	856	879	930	812		-8.25
03/13/2023	13	3	2023	2023-03-13	933	822	1055	822		0.76
03/10/2023	10	3	2023	2023-03-10	926	970	977	890		2.66
03/09/2023	9	3	2023	2023-03-09	902	852	904	841		3.92
03/08/2023	8	3	2023	2023-03-08	868	822	870	820		0.81
03/07/2023	7	3	2023	2023-03-07	861	853	875	818		2.87
03/06/2023	6	3	2023	2023-03-06	837	877	888	830		0.24
03/03/2023	3	3	2023	2023-03-03	835	887	1117	828		-1.76
03/02/2023	2	3	2023	2023-03-02	850	851	1053	844		-0.12
03/01/2023	1	3	2023	2023-03-01	851	929	1006	835		3.28
02/28/2023	28	2	2023	2023-02-28	824	935	935	818		-2.49
02/27/2023	27	2	2023	2023-02-27	845	1001	1001	842		-0.47
02/24/2023	24	2	2023	2023-02-24	849	956	956	836		0.12
02/23/2023	23	2	2023	2023-02-23	848	901	901	839		-0.12
02/22/2023	22	2	2023	2023-02-22	849	813	881	813		-0.24
02/21/2023	21	2	2023	2023-02-21	851	846	1024	840		0.83
02/17/2023	17	2	2023	2023-02-17	844	879	910	835		2.06
02/16/2023	16	2	2023	2023-02-16	827	882	882	811		-2.71
02/15/2023	15	2	2023	2023-02-15	850	934	950	844		-1.62
02/14/2023	14	2	2023	2023-02-14	864	1006	1006	859		-9.91
02/13/2023	13	2	2023	2023-02-13	959	980	1005	944		4.81
02/10/2023	10	2	2023	2023-02-10	915	951	953	910		1.1
02/09/2023	9	2	2023	2023-02-09	905	969	969	895		2.38
02/08/2023	8	2	2023	2023-02-08	884	935	939	873		-5.25
02/07/2023	7	2	2023	2023-02-07	933	930	971	883		3.67
02/06/2023	6	2	2023	2023-02-06	900	949	953	874		4.29
02/03/2023	3	2	2023	2023-02-03	863	859	1149	842		-0.35
02/02/2023	2	2	2023	2023-02-02	866	935	935	859		-0.46
02/01/2023	1	2	2023	2023-02-01	870	1012	1267	868		-4.29
01/31/2023	31	1	2023	2023-01-31	909	1024	1024	895		-0.44
01/30/2023	30	1	2023	2023-01-30	913	1005	1005	896		6.16
01/27/2023	27	1	2023	2023-01-27	860	925	932	855		-2.27
01/26/2023	26	1	2023	2023-01-26	880	881	920	874		-0.11
01/25/2023	25	1	2023	2023-01-25	881	872	943	865		0
01/24/2023	24	1	2023	2023-01-24	881	921	1264	863		-2.22
01/23/2023	23	1	2023	2023-01-23	901	905	907	867		4.89
01/20/2023	20	1	2023	2023-01-20	859	934	959	853		-3.27
01/19/2023	19	1	2023	2023-01-19	888	985	985	882		-1.22
01/18/2023	18	1	2023	2023-01-18	899	936	965	884		-1.75
01/17/2023	17	1	2023	2023-01-17	915	932	951	893		4.1
01/13/2023	13	1	2023	2023-01-13	879	1121	1122	878		-4.14
01/12/2023	12	1	2023	2023-01-12	917	907	954	882		-3.78
01/11/2023	11	1	2023	2023-01-11	953	940	1004	940		-1.04
01/10/2023	10	1	2023	2023-01-10	963	965	975	950		-1.03
01/09/2023	9	1	2023	2023-01-09	973	942	997	941		1.78
01/06/2023	6	1	2023	2023-01-06	956	935	1123	935		-2.05
01/05/2023	5	1	2023	2023-01-05	976	925	1011	925		0.83
01/04/2023	4	1	2023	2023-01-04	968	955	1301	955		0.1
01/03/2023	3	1	2023	2023-01-03	967	1029	1030	962		2.11
12/30/2022	30	12	2022	2022-12-30	947	949	995	922		1.83
12/29/2022	29	12	2022	2022-12-29	930	937	977	919		2.54
12/28/2022	28	12	2022	2022-12-28	907	898	929	890		1.11
12/27/2022	27	12	2022	2022-12-27	897	913	914	879		6.41
12/23/2022	23	12	2022	2022-12-23	843	873	924	833		-0.12
12/22/2022	22	12	2022	2022-12-22	844	752	868	752		3.43
12/21/2022	21	12	2022	2022-12-21	816	875	920	813		-1.69
12/20/2022	20	12	2022	2022-12-20	830	793	854	791		0.97
12/19/2022	19	12	2022	2022-12-19	822	1211	1211	796		0.49
12/16/2022	16	12	2022	2022-12-16	818	872	944	792		-3.31
12/15/2022	15	12	2022	2022-12-15	846	881	901	751		6.28
12/14/2022	14	12	2022	2022-12-14	796	920	1097	769		-10.96
12/13/2022	13	12	2022	2022-12-13	894	802	930	771		-9.88
12/12/2022	12	12	2022	2022-12-12	992	1101	1102	980		-3.69
12/09/2022	9	12	2022	2022-12-09	1030	1183	1183	1022		-4.19
12/08/2022	8	12	2022	2022-12-08	1075	1121	1121	1064		-3.85
12/07/2022	7	12	2022	2022-12-07	1118	1181	1181	1089		-0.71
12/06/2022	6	12	2022	2022-12-06	1126	1168	1168	1106		-1.31
12/05/2022	5	12	2022	2022-12-05	1141	1119	1154	1115		-0.61
12/02/2022	2	12	2022	2022-12-02	1148	1261	1262	1148		-9.25
12/01/2022	1	12	2022	2022-12-01	1265	1135	1270	1134		11.06
11/30/2022	30	11	2022	2022-11-30	1139	1334	1336	1123		-3.72
11/29/2022	29	11	2022	2022-11-29	1183	1197	1242	1158		-0.34
11/28/2022	28	11	2022	2022-11-28	1187	1335	1356	1179		0.51
11/25/2022	25	11	2022	2022-11-25	1181	1287	1287	1178		-1.58
11/23/2022	23	11	2022	2022-11-23	1200	1061	1239	1061		2.74
11/22/2022	22	11	2022	2022-11-22	1168	1070	1185	1070		-4.42
11/21/2022	21	11	2022	2022-11-21	1222	1344	1344	1216		2.86
11/18/2022	18	11	2022	2022-11-18	1188	1220	1252	1186		-4.27
11/17/2022	17	11	2022	2022-11-17	1241	1253	1287	1223		0.98
11/16/2022	16	11	2022	2022-11-16	1229	1180	1266	1180		0.49
11/15/2022	15	11	2022	2022-11-15	1223	1255	1255	1153		0.08
11/14/2022	14	11	2022	2022-11-14	1222	1270	1270	1210		0.74
11/11/2022	11	11	2022	2022-11-11	1213	1168	1247	1151		3.76
11/10/2022	10	11	2022	2022-11-10	1169	1115	1174	1108		-2.18
11/09/2022	9	11	2022	2022-11-09	1195	1219	1220	1155		0.84
11/08/2022	8	11	2022	2022-11-08	1185	1105	1190	1105		-0.25
11/07/2022	7	11	2022	2022-11-07	1188	1161	1211	1161		-0.34
11/04/2022	4	11	2022	2022-11-04	1192	1074	1200	1073		-0.58
11/03/2022	3	11	2022	2022-11-03	1199	1171	1208	1171		1.01
11/02/2022	2	11	2022	2022-11-02	1187	1139	1238	1131		-2.38
11/01/2022	1	11	2022	2022-11-01	1216	1209	1251	1184		-1.7
10/31/2022	31	10	2022	2022-10-31	1237	1175	1276	1175		4.04
10/28/2022	28	10	2022	2022-10-28	1189	1645	1645	1158		1.62
10/27/2022	27	10	2022	2022-10-27	1170	1339	1387	1138		0.26
10/26/2022	26	10	2022	2022-10-26	1167	1261	1261	1161		-7.75
10/25/2022	25	10	2022	2022-10-25	1265	1352	1353	1204		-1.79
10/24/2022	24	10	2022	2022-10-24	1288	1359	1367	1283		0
10/21/2022	21	10	2022	2022-10-21	1288	1744	1744	1267		1.9
10/20/2022	20	10	2022	2022-10-20	1264	1349	1351	1250		-0.47
10/19/2022	19	10	2022	2022-10-19	1270	1375	1375	1259		0.47
10/18/2022	18	10	2022	2022-10-18	1264	1281	1287	1248		-4.39
10/17/2022	17	10	2022	2022-10-17	1322	1500	1545	1274		1.07
10/14/2022	14	10	2022	2022-10-14	1308	1319	1644	1290		-0.83
10/13/2022	13	10	2022	2022-10-13	1319	1367	1438	1295		-5.31
10/12/2022	12	10	2022	2022-10-12	1393	1396	1446	1376		0
10/11/2022	11	10	2022	2022-10-11	1393	1312	1450	1312		-1.42
10/10/2022	10	10	2022	2022-10-10	1413	1548	1564	1403		2.61
10/07/2022	7	10	2022	2022-10-07	1377	1553	1553	1359		-0.94
10/06/2022	6	10	2022	2022-10-06	1390	1416	1416	1366		2.73
10/05/2022	5	10	2022	2022-10-05	1353	1520	1521	1348		3.12
10/04/2022	4	10	2022	2022-10-04	1312	1323	1330	1289		-4.93
10/03/2022	3	10	2022	2022-10-03	1380	1721	1797	1364		-3.09
09/30/2022	30	9	2022	2022-09-30	1424	1714	1720	1414		-2.06
09/29/2022	29	9	2022	2022-09-29	1454	1541	1541	1411		2.11
09/28/2022	28	9	2022	2022-09-28	1424	1576	1576	1405		0.21
09/27/2022	27	9	2022	2022-09-27	1421	1507	1507	1372		0.85
09/26/2022	26	9	2022	2022-09-26	1409	1370	1569	1328		10.6
09/23/2022	23	9	2022	2022-09-23	1274	1060	1299	1059		18.84
09/22/2022	22	9	2022	2022-09-22	1072	1089	1090	1053		0.47
09/21/2022	21	9	2022	2022-09-21	1067	1393	1393	1042		-5.66
09/20/2022	20	9	2022	2022-09-20	1131	1266	1266	1110		2.08
09/19/2022	19	9	2022	2022-09-19	1108	1435	1435	1097		2.03
09/16/2022	16	9	2022	2022-09-16	1086	1298	1298	1084		-1.54
09/15/2022	15	9	2022	2022-09-15	1103	1084	1111	1074		-0.09
09/14/2022	14	9	2022	2022-09-14	1104	1106	1128	1091		-3.83
09/13/2022	13	9	2022	2022-09-13	1148	1112	1151	1089		5.81
09/12/2022	12	9	2022	2022-09-12	1085	1090	1100	1075		1.59
09/09/2022	9	9	2022	2022-09-09	1068	1086	1093	1066		-2.82
09/08/2022	8	9	2022	2022-09-08	1099	1135	1143	1099		-5.01
09/07/2022	7	9	2022	2022-09-07	1157	1418	1418	1155		-2.2
09/06/2022	6	9	2022	2022-09-06	1183	1191	1205	1167		2.69
09/02/2022	2	9	2022	2022-09-02	1152	1114	1157	1083		-1.71
09/01/2022	1	9	2022	2022-09-01	1172	1134	1191	1129		4.64
08/31/2022	31	8	2022	2022-08-31	1120	1136	1144	1120		-1.67
08/30/2022	30	8	2022	2022-08-30	1139	1135	1159	1135		-1.3
08/29/2022	29	8	2022	2022-08-29	1154	1164	1169	1153		3.96
08/26/2022	26	8	2022	2022-08-26	1110	1087	1147	1073		-1.68
08/25/2022	25	8	2022	2022-08-25	1129	1137	1142	1126		-1.91
08/24/2022	24	8	2022	2022-08-24	1151	1161	1171	1144		-0.95
08/23/2022	23	8	2022	2022-08-23	1162	1172	1177	1153		-3.65
08/22/2022	22	8	2022	2022-08-22	1206	1150	1206	1140		6.82
08/19/2022	19	8	2022	2022-08-19	1129	1136	1157	1106		2.45
08/18/2022	18	8	2022	2022-08-18	1102	1037	1114	1028		5.25
08/17/2022	17	8	2022	2022-08-17	1047	1034	1060	1023		1.75
08/16/2022	16	8	2022	2022-08-16	1029	1019	1037	1017		0.78
08/15/2022	15	8	2022	2022-08-15	1021	970	1023	963		13.07
08/12/2022	12	8	2022	2022-08-12	903	880	912	878		0.22
08/11/2022	11	8	2022	2022-08-11	901	890	904	874		-0.55
08/10/2022	10	8	2022	2022-08-10	906	916	924	887		-6.89
08/09/2022	9	8	2022	2022-08-09	973	982	1399	938		-0.92
08/08/2022	8	8	2022	2022-08-08	982	983	996	971		-0.51
08/05/2022	5	8	2022	2022-08-05	987	1005	1014	982		-3.99
08/04/2022	4	8	2022	2022-08-04	1028	1049	1062	1025		-4.46
08/03/2022	3	8	2022	2022-08-03	1076	1095	1113	1073		0.75
08/02/2022	2	8	2022	2022-08-02	1068	1049	1074	1039		1.71
08/01/2022	1	8	2022	2022-08-01	1050	1052	1067	1043		-1.04
07/29/2022	29	7	2022	2022-07-29	1061	1102	1106	1059		-3.72
07/28/2022	28	7	2022	2022-07-28	1102	1051	1154	1051		0.92
07/27/2022	27	7	2022	2022-07-27	1092	1152	1455	1088		-6.35
07/26/2022	26	7	2022	2022-07-26	1166	1464	1464	1163		0.6
07/25/2022	25	7	2022	2022-07-25	1159	1243	1271	1131		-2.03
07/22/2022	22	7	2022	2022-07-22	1183	1195	1199	1167		-1.74
07/21/2022	21	7	2022	2022-07-21	1204	1238	1256	1201		-3.53
07/20/2022	20	7	2022	2022-07-20	1248	1252	1258	1235		-0.79
07/19/2022	19	7	2022	2022-07-19	1258	1319	1325	1256		-2.63
07/18/2022	18	7	2022	2022-07-18	1292	1270	1323	1168		0.62
07/15/2022	15	7	2022	2022-07-15	1284	1274	1291	1248		-6.28
07/14/2022	14	7	2022	2022-07-14	1370	1367	1430	1356		7.87
07/13/2022	13	7	2022	2022-07-13	1270	1244	1272	1225		1.44
07/12/2022	12	7	2022	2022-07-12	1252	1282	1294	1244		-1.26
07/11/2022	11	7	2022	2022-07-11	1268	1230	1276	1215		13.62
07/08/2022	8	7	2022	2022-07-08	1116	1134	1145	1114		-2.62
07/07/2022	7	7	2022	2022-07-07	1146	1114	1313	1114		-3.21
07/06/2022	6	7	2022	2022-07-06	1184	1222	1225	1138		2.87
07/05/2022	5	7	2022	2022-07-05	1151	1153	1169	1145		13.29
07/01/2022	1	7	2022	2022-07-01	1016	1038	1053	990		4.74
06/30/2022	30	6	2022	2022-06-30	970	976	1080	960		0.21
06/29/2022	29	6	2022	2022-06-29	968	916	968	895		5.68
06/28/2022	28	6	2022	2022-06-28	916	874	926	874		2.46
06/27/2022	27	6	2022	2022-06-27	894	894	906	884		1.59
06/24/2022	24	6	2022	2022-06-24	880	1294	1367	844		-6.78
06/23/2022	23	6	2022	2022-06-23	944	956	959	935		-0.94
06/22/2022	22	6	2022	2022-06-22	953	976	988	953		-0.42
06/21/2022	21	6	2022	2022-06-21	957	927	1100	927		-9.12
06/17/2022	17	6	2022	2022-06-17	1053	1057	1081	1043		-3.04
06/16/2022	16	6	2022	2022-06-16	1086	1042	1107	1037		5.74
06/15/2022	15	6	2022	2022-06-15	1027	1092	1116	1027		-9.75
06/14/2022	14	6	2022	2022-06-14	1138	1132	1143	1058		0.53
06/13/2022	13	6	2022	2022-06-13	1132	1080	1141	1069		23.18
06/10/2022	10	6	2022	2022-06-10	919	896	920	868		6.61
06/09/2022	9	6	2022	2022-06-09	862	845	873	845		-0.92
06/08/2022	8	6	2022	2022-06-08	870	878	883	868		0.35
06/07/2022	7	6	2022	2022-06-07	867	900	902	867		-1.14
06/06/2022	6	6	2022	2022-06-06	877	855	881	851		4.53
06/03/2022	3	6	2022	2022-06-03	839	860	860	831		-2.44
06/02/2022	2	6	2022	2022-06-02	860	878	878	846		-2.05
06/01/2022	1	6	2022	2022-06-01	878	858	920	838		2.33
05/31/2022	31	5	2022	2022-05-31	858	861	898	800		-0.69
05/27/2022	27	5	2022	2022-05-27	864	912	966	850		-5.26
05/26/2022	26	5	2022	2022-05-26	912	935	935	830		-2.46
05/25/2022	25	5	2022	2022-05-25	935	917	1032	914		1.96
05/24/2022	24	5	2022	2022-05-24	917	929	944	912		-1.29
05/23/2022	23	5	2022	2022-05-23	929	934	941	907		-1.06
05/20/2022	20	5	2022	2022-05-20	939	965	965	910		-2.69
05/19/2022	19	5	2022	2022-05-19	965	1006	1006	954		-4.08
05/18/2022	18	5	2022	2022-05-18	1006	957	1013	937		5.12
05/17/2022	17	5	2022	2022-05-17	957	989	989	918		-3.24
05/16/2022	16	5	2022	2022-05-16	989	1050	1111	985		-6.96
05/13/2022	13	5	2022	2022-05-13	1063	1125	1125	1054		-5.51
05/12/2022	12	5	2022	2022-05-12	1125	961	1136	961		17.07
05/11/2022	11	5	2022	2022-05-11	961	1026	1026	875		-6.34
05/10/2022	10	5	2022	2022-05-10	1026	1119	1119	1020		-8.31
05/09/2022	9	5	2022	2022-05-09	1119	1117	1226	1013		3.42
05/06/2022	6	5	2022	2022-05-06	1082	1101	1102	1065		-1.73
05/05/2022	5	5	2022	2022-05-05	1101	976	1106	976		12.81
05/04/2022	4	5	2022	2022-05-04	976	1082	1312	971		-9.8
05/03/2022	3	5	2022	2022-05-03	1082	1121	1121	1065		-3.48
05/02/2022	2	5	2022	2022-05-02	1121	1114	1397	1066		6.66
04/29/2022	29	4	2022	2022-04-29	1051	1156	1156	1044		-9.08
04/28/2022	28	4	2022	2022-04-28	1156	1032	1210	1032		12.02
04/27/2022	27	4	2022	2022-04-27	1032	947	1108	947		8.98
04/26/2022	26	4	2022	2022-04-26	947	895	952	877		5.81
04/25/2022	25	4	2022	2022-04-25	895	874	900	868		-1.65
04/22/2022	22	4	2022	2022-04-22	910	879	912	879		3.53
04/21/2022	21	4	2022	2022-04-21	879	833	904	823		5.52
04/20/2022	20	4	2022	2022-04-20	833	854	858	829		-2.46
04/19/2022	19	4	2022	2022-04-19	854	898	898	796		-4.9
04/18/2022	18	4	2022	2022-04-18	898	879	915	864		0
04/14/2022	14	4	2022	2022-04-14	898	840	899	807		6.9
04/13/2022	13	4	2022	2022-04-13	840	867	881	827		-3.11
04/12/2022	12	4	2022	2022-04-12	867	882	885	842		-1.7
04/11/2022	11	4	2022	2022-04-11	882	923	940	865		-1.78
04/08/2022	8	4	2022	2022-04-08	898	911	960	885		-1.43
04/07/2022	7	4	2022	2022-04-07	911	955	955	887		-4.61
04/06/2022	6	4	2022	2022-04-06	955	944	1020	856		1.17
04/05/2022	5	4	2022	2022-04-05	944	894	960	851		5.59
04/04/2022	4	4	2022	2022-04-04	894	861	898	859		8.89
04/01/2022	1	4	2022	2022-04-01	821	842	913	809		-2.49
03/31/2022	31	3	2022	2022-03-31	842	812	862	812		3.69
03/30/2022	30	3	2022	2022-03-30	812	811	828	792		0.12
03/29/2022	29	3	2022	2022-03-29	811	869	894	769		-6.67
03/28/2022	28	3	2022	2022-03-28	869	886	907	863		6.89
03/25/2022	25	3	2022	2022-03-25	813	859	882	808		-5.36
03/24/2022	24	3	2022	2022-03-24	859	861	909	852		-0.23
03/23/2022	23	3	2022	2022-03-23	861	885	1050	857		-2.71
03/22/2022	22	3	2022	2022-03-22	885	888	938	854		-0.34
03/21/2022	21	3	2022	2022-03-21	888	898	1021	875		-2.63
03/18/2022	18	3	2022	2022-03-18	912	861	996	861		5.92
03/17/2022	17	3	2022	2022-03-17	861	886	886	830		-2.82
03/16/2022	16	3	2022	2022-03-16	886	1130	1194	881		-21.59
03/15/2022	15	3	2022	2022-03-15	1130	1186	1212	1099		-4.72
03/14/2022	14	3	2022	2022-03-14	1186	1186	1215	1165		-1.33
03/11/2022	11	3	2022	2022-03-11	1202	1131	1202	1123		6.28
03/10/2022	10	3	2022	2022-03-10	1131	1124	1325	1112		0.62
03/09/2022	9	3	2022	2022-03-09	1124	1243	1263	1112		-9.57
03/08/2022	8	3	2022	2022-03-08	1243	1394	1447	1167		-10.83
03/07/2022	7	3	2022	2022-03-07	1394	1300	1424	1300		7.23
03/04/2022	4	3	2022	2022-03-04	1300	1073	1334	1073		21.16
03/03/2022	3	3	2022	2022-03-03	1073	1036	1102	1003		3.57
03/02/2022	2	3	2022	2022-03-02	1036	1180	1180	1036		-12.2
03/01/2022	1	3	2022	2022-03-01	1180	917	1437	917		28.68
02/28/2022	28	2	2022	2022-02-28	917	932	1035	902		18.78
02/25/2022	25	2	2022	2022-02-25	772	810	810	752		-4.69
02/24/2022	24	2	2022	2022-02-24	810	744	888	744		8.87
02/23/2022	23	2	2022	2022-02-23	744	759	759	699		-1.98
02/22/2022	22	2	2022	2022-02-22	759	746	766	741		0.13
02/18/2022	18	2	2022	2022-02-18	758	757	813	702		0.13
02/17/2022	17	2	2022	2022-02-17	757	745	787	744		1.61
02/16/2022	16	2	2022	2022-02-16	745	759	925	707		-1.84
02/15/2022	15	2	2022	2022-02-15	759	807	807	735		-5.95
02/14/2022	14	2	2022	2022-02-14	807	911	925	791		-0.25
02/11/2022	11	2	2022	2022-02-11	809	715	819	714		13.15
02/10/2022	10	2	2022	2022-02-10	715	687	724	671		4.08
02/09/2022	9	2	2022	2022-02-09	687	696	710	675		-1.29
02/08/2022	8	2	2022	2022-02-08	696	720	789	679		-3.33
02/07/2022	7	2	2022	2022-02-07	720	726	728	710		5.73
02/04/2022	4	2	2022	2022-02-04	681	696	700	671		-2.16
02/03/2022	3	2	2022	2022-02-03	696	625	698	625		11.36
02/02/2022	2	2	2022	2022-02-02	625	658	658	619		-5.02
02/01/2022	1	2	2022	2022-02-01	658	669	691	645		-1.64
01/31/2022	31	1	2022	2022-01-31	669	648	725	622		3.24
01/28/2022	28	1	2022	2022-01-28	648	629	679	629		3.02
01/27/2022	27	1	2022	2022-01-27	629	607	647	607		3.62
01/26/2022	26	1	2022	2022-01-26	607	610	708	544		-0.49
01/25/2022	25	1	2022	2022-01-25	610	621	640	603		-1.77
01/24/2022	24	1	2022	2022-01-24	621	613	647	610		4.9
01/21/2022	21	1	2022	2022-01-21	592	587	619	563		0.85
01/20/2022	20	1	2022	2022-01-20	587	579	592	550		1.38
01/19/2022	19	1	2022	2022-01-19	579	606	606	563		-4.46
01/18/2022	18	1	2022	2022-01-18	606	599	630	578		8.8
01/14/2022	14	1	2022	2022-01-14	557	564	574	531		-1.24
01/13/2022	13	1	2022	2022-01-13	564	553	564	528		1.99
01/12/2022	12	1	2022	2022-01-12	553	574	574	538		-3.66
01/11/2022	11	1	2022	2022-01-11	574	566	581	549		1.41
01/10/2022	10	1	2022	2022-01-10	566	577	580	553		6.19
01/07/2022	7	1	2022	2022-01-07	533	570	570	515		-6.49
01/06/2022	6	1	2022	2022-01-06	570	545	587	531		4.59
01/05/2022	5	1	2022	2022-01-05	545	564	564	531		-3.37
01/04/2022	4	1	2022	2022-01-04	564	579	595	553		-2.59
01/03/2022	3	1	2022	2022-01-03	579	529	615	529		9.45
12/31/2021	31	12	2021	2021-12-31	529	555	575	524		-4.68
12/30/2021	30	12	2021	2021-12-30	555	562	571	551		-1.25
12/29/2021	29	12	2021	2021-12-29	562	572	588	540		-1.75
12/28/2021	28	12	2021	2021-12-28	572	559	578	491		2.33
12/27/2021	27	12	2021	2021-12-27	559	484	570	484		1.27
12/23/2021	23	12	2021	2021-12-23	552	544	563	528		1.47
12/22/2021	22	12	2021	2021-12-22	544	554	588	532		-1.81
12/21/2021	21	12	2021	2021-12-21	554	566	592	527		-2.12
12/20/2021	20	12	2021	2021-12-20	566	575	608	566		1.25
12/17/2021	17	12	2021	2021-12-17	559	570	963	431		-1.93
12/16/2021	16	12	2021	2021-12-16	570	585	701	552		-2.56
12/15/2021	15	12	2021	2021-12-15	585	661	725	584		-11.5
12/14/2021	14	12	2021	2021-12-14	661	588	680	588		12.41
12/13/2021	13	12	2021	2021-12-13	588	768	768	588		-13.02
12/10/2021	10	12	2021	2021-12-10	676	657	707	655		2.89
12/09/2021	9	12	2021	2021-12-09	657	662	692	654		-0.76
12/08/2021	8	12	2021	2021-12-08	662	671	697	662		-1.34
12/07/2021	7	12	2021	2021-12-07	671	701	705	648		-4.28
12/06/2021	6	12	2021	2021-12-06	701	699	718	689		0.14
12/03/2021	3	12	2021	2021-12-03	700	710	722	659		-1.41
12/02/2021	2	12	2021	2021-12-02	710	724	724	692		-1.93
12/01/2021	1	12	2021	2021-12-01	724	751	751	692		-3.6
11/30/2021	30	11	2021	2021-11-30	751	708	764	708		6.07
11/29/2021	29	11	2021	2021-11-29	708	719	721	690		-5.6
11/26/2021	26	11	2021	2021-11-26	750	691	773	691		8.54
11/24/2021	24	11	2021	2021-11-24	691	717	763	674		-3.63
11/23/2021	23	11	2021	2021-11-23	717	720	731	675		-0.42
11/22/2021	22	11	2021	2021-11-22	720	748	754	709		0.98
11/19/2021	19	11	2021	2021-11-19	713	694	743	694		2.74
11/18/2021	18	11	2021	2021-11-18	694	698	698	675		-0.57
11/17/2021	17	11	2021	2021-11-17	698	723	723	683		-3.46
11/16/2021	16	11	2021	2021-11-16	723	661	727	661		9.38
11/15/2021	15	11	2021	2021-11-15	661	604	664	603		9.44
11/12/2021	12	11	2021	2021-11-12	604	603	608	579		0.17
11/11/2021	11	11	2021	2021-11-11	603	598	606	579		0.84
11/10/2021	10	11	2021	2021-11-10	598	559	605	532		6.98
11/09/2021	9	11	2021	2021-11-09	559	537	565	511		4.1
11/08/2021	8	11	2021	2021-11-08	537	545	545	529		3.47
11/05/2021	5	11	2021	2021-11-05	519	514	533	512		0.97
11/04/2021	4	11	2021	2021-11-04	514	544	544	508		-5.51
11/03/2021	3	11	2021	2021-11-03	544	550	563	488		-1.09
11/02/2021	2	11	2021	2021-11-02	550	557	559	538		-1.26
11/01/2021	1	11	2021	2021-11-01	557	543	589	535		1.46
10/29/2021	29	10	2021	2021-10-29	549	525	646	513		4.57
10/28/2021	28	10	2021	2021-10-28	525	512	553	492		2.54
10/27/2021	27	10	2021	2021-10-27	512	508	524	503		0.79
10/26/2021	26	10	2021	2021-10-26	508	520	521	490		-2.31
10/25/2021	25	10	2021	2021-10-25	520	511	526	508		6.12
10/22/2021	22	10	2021	2021-10-22	490	493	493	465		-0.61
10/21/2021	21	10	2021	2021-10-21	493	501	501	475		-1.6
10/20/2021	20	10	2021	2021-10-20	501	509	511	495		-1.57
10/19/2021	19	10	2021	2021-10-19	509	509	526	496		0
10/18/2021	18	10	2021	2021-10-18	509	513	531	477		1.19
10/15/2021	15	10	2021	2021-10-15	503	471	534	471		6.79
10/14/2021	14	10	2021	2021-10-14	471	499	507	456		-5.61
10/13/2021	13	10	2021	2021-10-13	499	536	548	467		-6.9
10/12/2021	12	10	2021	2021-10-12	536	575	575	512		-6.78
10/11/2021	11	10	2021	2021-10-11	575	545	585	541		10.79
10/08/2021	8	10	2021	2021-10-08	519	543	569	516		-4.42
10/07/2021	7	10	2021	2021-10-07	543	550	595	519		-1.27
10/06/2021	6	10	2021	2021-10-06	550	528	599	528		4.17
10/05/2021	5	10	2021	2021-10-05	528	543	551	521		-2.76
10/04/2021	4	10	2021	2021-10-04	543	528	601	515		7.74
10/01/2021	1	10	2021	2021-10-01	504	540	550	504		-6.67
09/30/2021	30	9	2021	2021-09-30	540	563	678	511		-4.09
09/29/2021	29	9	2021	2021-09-29	563	523	566	510		7.65
09/28/2021	28	9	2021	2021-09-28	523	493	531	493		6.09
09/27/2021	27	9	2021	2021-09-27	493	488	494	472		2.28
09/24/2021	24	9	2021	2021-09-24	482	484	487	473		-0.41
09/23/2021	23	9	2021	2021-09-23	484	503	503	471		-3.78
09/22/2021	22	9	2021	2021-09-22	503	526	559	472		-4.37
09/21/2021	21	9	2021	2021-09-21	526	544	544	518		-3.31
09/20/2021	20	9	2021	2021-09-20	544	507	551	507		7.3
09/17/2021	17	9	2021	2021-09-17	507	517	517	486		-1.93
09/16/2021	16	9	2021	2021-09-16	517	493	519	488		4.87
09/15/2021	15	9	2021	2021-09-15	493	512	512	467		-3.71
09/14/2021	14	9	2021	2021-09-14	512	516	529	473		-0.78
09/13/2021	13	9	2021	2021-09-13	516	532	532	504		0.98
09/10/2021	10	9	2021	2021-09-10	511	511	511	511		0
09/09/2021	9	9	2021	2021-09-09	511	520	525	497		-4.13
09/08/2021	8	9	2021	2021-09-08	533	527	565	511		1.14
09/07/2021	7	9	2021	2021-09-07	527	515	544	515		3.94
09/03/2021	3	9	2021	2021-09-03	507	511	516	498		-2.5
09/02/2021	2	9	2021	2021-09-02	520	537	537	477		-3.17
09/01/2021	1	9	2021	2021-09-01	537	556	607	505		-3.42
08/31/2021	31	8	2021	2021-08-31	556	534	580	511		4.12
08/30/2021	30	8	2021	2021-08-30	534	525	553	506		1.33
08/27/2021	27	8	2021	2021-08-27	527	535	565	513		-1.5
08/26/2021	26	8	2021	2021-08-26	535	537	554	524		-0.37
08/25/2021	25	8	2021	2021-08-25	537	532	539	482		0.94
08/24/2021	24	8	2021	2021-08-24	532	540	553	488		-1.48
08/23/2021	23	8	2021	2021-08-23	540	536	548	515		-0.37
08/20/2021	20	8	2021	2021-08-20	542	536	563	535		1.12
08/19/2021	19	8	2021	2021-08-19	536	566	572	536		-2.37
08/18/2021	18	8	2021	2021-08-18	549	581	581	506		-5.51
08/17/2021	17	8	2021	2021-08-17	581	531	585	510		6.41
08/16/2021	16	8	2021	2021-08-16	546	522	547	512		5.41
08/13/2021	13	8	2021	2021-08-13	518	518	518	518		0
08/12/2021	12	8	2021	2021-08-12	518	518	518	518		0
08/11/2021	11	8	2021	2021-08-11	518	518	518	518		0
08/10/2021	10	8	2021	2021-08-10	518	518	518	518		0
08/09/2021	9	8	2021	2021-08-09	518	518	518	518		0
08/06/2021	6	8	2021	2021-08-06	518	554	554	517		-6.5
08/05/2021	5	8	2021	2021-08-05	554	554	554	554		0
08/04/2021	4	8	2021	2021-08-04	554	547	554	542		1.28
08/03/2021	3	8	2021	2021-08-03	547	547	547	547		0
08/02/2021	2	8	2021	2021-08-02	547	516	547	516		6.01
07/30/2021	30	7	2021	2021-07-30	516	522	522	516		-1.15
07/29/2021	29	7	2021	2021-07-29	522	562	562	522		-7.12
07/28/2021	28	7	2021	2021-07-28	562	571	581	531		-1.06
07/27/2021	27	7	2021	2021-07-27	568	552	582	527		3.46
07/26/2021	26	7	2021	2021-07-26	549	538	569	527		-12.02
07/23/2021	23	7	2021	2021-07-23	624	550	628	479		23.56
07/22/2021	22	7	2021	2021-07-22	505	550	595	505		-8.18
07/21/2021	21	7	2021	2021-07-21	550	569	599	502		-9.84
07/20/2021	20	7	2021	2021-07-20	610	559	641	556		9.12
07/19/2021	19	7	2021	2021-07-19	559	515	661	515		8.33
07/16/2021	16	7	2021	2021-07-16	516	572	606	488		-6.52
07/15/2021	15	7	2021	2021-07-15	552	549	578	502		0.55
07/14/2021	14	7	2021	2021-07-14	549	552	585	511		2.81
07/13/2021	13	7	2021	2021-07-13	534	540	591	509		0.95
07/12/2021	12	7	2021	2021-07-12	529	500	554	500		-11.83
07/09/2021	9	7	2021	2021-07-09	600	600	600	600		0
07/08/2021	8	7	2021	2021-07-08	600	600	600	600		0
07/07/2021	7	7	2021	2021-07-07	600	600	600	600		0
07/06/2021	6	7	2021	2021-07-06	600	600	600	600		0
07/02/2021	2	7	2021	2021-07-02	600	600	600	600		0
07/01/2021	1	7	2021	2021-07-01	600	600	600	600		-0.33
06/30/2021	30	6	2021	2021-06-30	602	565	613	565		6.55
06/29/2021	29	6	2021	2021-06-29	565	563	575	549		0.36
06/28/2021	28	6	2021	2021-06-28	563	561	564	546		5.04
06/25/2021	25	6	2021	2021-06-25	536	551	551	520		-2.72
06/24/2021	24	6	2021	2021-06-24	551	565	576	535		-2.48
06/23/2021	23	6	2021	2021-06-23	565	567	573	549		0.71
06/22/2021	22	6	2021	2021-06-22	561	590	662	560		-4.1
06/21/2021	21	6	2021	2021-06-21	585	579	607	572		1.56
06/18/2021	18	6	2021	2021-06-18	576	586	605	566		7.26
06/17/2021	17	6	2021	2021-06-17	537	608	611	537		-2.89
06/16/2021	16	6	2021	2021-06-16	553	556	581	497		5.13
06/15/2021	15	6	2021	2021-06-15	526	534	571	489		0
06/14/2021	14	6	2021	2021-06-14	526	520	527	511		-5.9
06/11/2021	11	6	2021	2021-06-11	559	559	559	559		0
06/10/2021	10	6	2021	2021-06-10	559	559	559	559		0
06/09/2021	9	6	2021	2021-06-09	559	558	571	555		-3.12
06/08/2021	8	6	2021	2021-06-08	577	579	579	560		-0.35
06/07/2021	7	6	2021	2021-06-07	579	631	631	571		-8.24
06/04/2021	4	6	2021	2021-06-04	631	631	631	631		0
06/03/2021	3	6	2021	2021-06-03	631	618	642	599		4.99
06/02/2021	2	6	2021	2021-06-02	601	613	613	591		-1.96
06/01/2021	1	6	2021	2021-06-01	613	613	655	597		0.16
05/28/2021	28	5	2021	2021-05-28	612	618	655	593		-0.65
05/27/2021	27	5	2021	2021-05-27	616	616	682	557		0.98
05/26/2021	26	5	2021	2021-05-26	610	636	636	591		-4.09
05/25/2021	25	5	2021	2021-05-25	636	634	660	615		5.12
05/24/2021	24	5	2021	2021-05-24	605	620	627	597		1.17
05/21/2021	21	5	2021	2021-05-21	598	624	664	595		-2.45
05/20/2021	20	5	2021	2021-05-20	613	606	641	604		-5.11
05/19/2021	19	5	2021	2021-05-19	646	654	692	627		1.73
05/18/2021	18	5	2021	2021-05-18	635	622	641	606		6.72
05/17/2021	17	5	2021	2021-05-17	595	606	619	587		-4.49
05/14/2021	14	5	2021	2021-05-14	623	623	623	623		0
05/13/2021	13	5	2021	2021-05-13	623	656	656	612		-5.03
05/12/2021	12	5	2021	2021-05-12	656	646	709	615		1.55
05/11/2021	11	5	2021	2021-05-11	646	646	646	646		0
05/10/2021	10	5	2021	2021-05-10	646	646	646	646		0
05/07/2021	7	5	2021	2021-05-07	646	643	649	610		6.6
05/06/2021	6	5	2021	2021-05-06	606	599	612	590		1.17
05/05/2021	5	5	2021	2021-05-05	599	589	603	587		-1.16
05/04/2021	4	5	2021	2021-05-04	606	582	623	575		2.36
05/03/2021	3	5	2021	2021-05-03	592	579	616	578		2.42
04/30/2021	30	4	2021	2021-04-30	578	562	591	537		5.09
04/29/2021	29	4	2021	2021-04-29	550	558	569	534		-2.14
04/28/2021	28	4	2021	2021-04-28	562	590	735	539		-1.75
04/27/2021	27	4	2021	2021-04-27	572	567	580	547		-2.56
04/26/2021	26	4	2021	2021-04-26	587	588	597	571		3.53
04/23/2021	23	4	2021	2021-04-23	567	574	608	542		-4.71
04/22/2021	22	4	2021	2021-04-22	595	594	967	540		-2.14
04/21/2021	21	4	2021	2021-04-21	608	683	683	592		-1.62
04/20/2021	20	4	2021	2021-04-20	618	601	618	586		2.66
04/19/2021	19	4	2021	2021-04-19	602	561	624	561		7.31
04/16/2021	16	4	2021	2021-04-16	561	567	579	542		-1.06
04/15/2021	15	4	2021	2021-04-15	567	540	583	540		5
04/14/2021	14	4	2021	2021-04-14	540	574	574	495		-3.74
04/13/2021	13	4	2021	2021-04-13	561	558	587	534		2.94
04/12/2021	12	4	2021	2021-04-12	545	581	581	534		-15.5
04/09/2021	9	4	2021	2021-04-09	645	645	645	645		0
04/08/2021	8	4	2021	2021-04-08	645	645	645	645		0
04/07/2021	7	4	2021	2021-04-07	645	644	645	639		0.16
04/06/2021	6	4	2021	2021-04-06	644	572	646	572		12.59
04/05/2021	5	4	2021	2021-04-05	572	572	572	572		0
04/01/2021	1	4	2021	2021-04-01	572	575	578	570		-10.63
03/31/2021	31	3	2021	2021-03-31	640	640	640	640		0
03/30/2021	30	3	2021	2021-03-30	640	634	658	608		0.95
03/29/2021	29	3	2021	2021-03-29	634	632	652	621		3.76
03/26/2021	26	3	2021	2021-03-26	611	628	633	591		-6
03/25/2021	25	3	2021	2021-03-25	650	637	677	634		1.88
03/24/2021	24	3	2021	2021-03-24	638	621	667	621		2.74
03/23/2021	23	3	2021	2021-03-23	621	630	635	594		-1.43
03/22/2021	22	3	2021	2021-03-22	630	633	663	615		-0.47
03/19/2021	19	3	2021	2021-03-19	633	657	660	622		-3.65
03/18/2021	18	3	2021	2021-03-18	657	648	662	627		0.61
03/17/2021	17	3	2021	2021-03-17	653	665	691	634		-4.39
03/16/2021	16	3	2021	2021-03-16	683	668	710	622		2.25
03/15/2021	15	3	2021	2021-03-15	668	1318	1318	657		0.75
03/12/2021	12	3	2021	2021-03-12	663	650	682	650		2.16
03/11/2021	11	3	2021	2021-03-11	649	672	677	646		-5.81
03/10/2021	10	3	2021	2021-03-10	689	692	700	679		-0.29
03/09/2021	9	3	2021	2021-03-09	691	717	722	682		-4.29
03/08/2021	8	3	2021	2021-03-08	722	714	737	688		6.33
03/05/2021	5	3	2021	2021-03-05	679	686	770	647		-4.23
03/04/2021	4	3	2021	2021-03-04	709	679	724	648		8.24
03/03/2021	3	3	2021	2021-03-03	655	653	694	623		-1.06
03/02/2021	2	3	2021	2021-03-02	662	670	672	636		-1.05
03/01/2021	1	3	2021	2021-03-01	669	698	753	653		-7.47
02/26/2021	26	2	2021	2021-02-26	723	723	786	651		-4.24
02/25/2021	25	2	2021	2021-02-25	755	665	804	635		18.9
02/24/2021	24	2	2021	2021-02-24	635	650	718	635		-6.07
02/23/2021	23	2	2021	2021-02-23	676	655	681	639		6.96
02/22/2021	22	2	2021	2021-02-22	632	625	651	612		6.58
02/19/2021	19	2	2021	2021-02-19	593	621	635	574		-4.51
02/18/2021	18	2	2021	2021-02-18	621	662	665	603		-5.48
02/17/2021	17	2	2021	2021-02-17	657	663	677	633		4.12
02/16/2021	16	2	2021	2021-02-16	631	630	632	599		1.45
02/12/2021	12	2	2021	2021-02-12	622	622	622	622		0
02/11/2021	11	2	2021	2021-02-11	622	622	622	622		0
02/10/2021	10	2	2021	2021-02-10	622	622	622	622		0
02/09/2021	9	2	2021	2021-02-09	622	622	622	622		0.65
02/08/2021	8	2	2021	2021-02-08	618	613	629	602		-0.16
02/05/2021	5	2	2021	2021-02-05	619	649	649	603		-4.33
02/04/2021	4	2	2021	2021-02-04	647	657	665	631		-1.37
02/03/2021	3	2	2021	2021-02-03	656	657	746	632		1.71
02/02/2021	2	2	2021	2021-02-02	645	649	663	634		-1.23
02/01/2021	1	2	2021	2021-02-01	653	664	686	634		3.65
01/29/2021	29	1	2021	2021-01-29	630	632	673	608		1.29
01/28/2021	28	1	2021	2021-01-28	622	643	709	592		-3.12
01/27/2021	27	1	2021	2021-01-27	642	656	824	630		4.73
01/26/2021	26	1	2021	2021-01-26	613	603	639	603		-5.4
01/25/2021	25	1	2021	2021-01-25	648	626	666	623		3.18
01/22/2021	22	1	2021	2021-01-22	628	664	685	619		-4.41
01/21/2021	21	1	2021	2021-01-21	657	652	663	633		5.46
01/20/2021	20	1	2021	2021-01-20	623	636	649	612		-6.88
01/19/2021	19	1	2021	2021-01-19	669	667	1015	647		2.61
01/15/2021	15	1	2021	2021-01-15	652	678	709	631		2.19
01/14/2021	14	1	2021	2021-01-14	638	674	679	632		-6.73
01/13/2021	13	1	2021	2021-01-13	684	712	715	658		1.03
01/12/2021	12	1	2021	2021-01-12	677	696	709	650		-2.31
01/11/2021	11	1	2021	2021-01-11	693	711	740	661		0.29
01/08/2021	8	1	2021	2021-01-08	691	746	746	671		-1.29
01/07/2021	7	1	2021	2021-01-07	700	692	761	683		0.14
01/06/2021	6	1	2021	2021-01-06	699	693	711	688		-4.9
01/05/2021	5	1	2021	2021-01-05	735	733	743	720		-1.08
01/04/2021	4	1	2021	2021-01-04	743	775	777	729		1.92
12/31/2020	31	12	2020	2020-12-31	729	749	812	717		-3.7
12/30/2020	30	12	2020	2020-12-30	757	725	810	721		4.41
12/29/2020	29	12	2020	2020-12-29	725	704	771	702		4.02
12/28/2020	28	12	2020	2020-12-28	697	752	758	672		1.01
12/24/2020	24	12	2020	2020-12-24	690	735	789	646		-6.12
12/23/2020	23	12	2020	2020-12-23	735	820	829	717		-0.41
12/22/2020	22	12	2020	2020-12-22	738	718	754	708		-3.28
12/21/2020	21	12	2020	2020-12-21	763	1006	1020	687		12.7
12/18/2020	18	12	2020	2020-12-18	677	705	749	673		-7.26
12/17/2020	17	12	2020	2020-12-17	730	755	772	714		0.27
12/16/2020	16	12	2020	2020-12-16	728	743	766	632		-5.7
12/15/2020	15	12	2020	2020-12-15	772	973	973	721		-0.26
12/14/2020	14	12	2020	2020-12-14	774	751	785	702		1.57
12/11/2020	11	12	2020	2020-12-11	762	780	804	735		4.1
12/10/2020	10	12	2020	2020-12-10	732	761	1017	705		-4.06
12/09/2020	9	12	2020	2020-12-09	763	730	768	705		2.14
12/08/2020	8	12	2020	2020-12-08	747	753	776	741		-6.74
12/07/2020	7	12	2020	2020-12-07	801	806	815	784		4.3
12/04/2020	4	12	2020	2020-12-04	768	785	785	744		0.79
12/03/2020	3	12	2020	2020-12-03	762	794	809	732		2.7
12/02/2020	2	12	2020	2020-12-02	742	743	786	717		3.49
12/01/2020	1	12	2020	2020-12-01	717	680	743	667		7.5
11/30/2020	30	11	2020	2020-11-30	667	738	808	652		-0.15
11/27/2020	27	11	2020	2020-11-27	668	664	670	649		0
11/25/2020	25	11	2020	2020-11-25	668	658	692	629		4.7
11/24/2020	24	11	2020	2020-11-24	638	631	659	585		0
11/23/2020	23	11	2020	2020-11-23	638	654	657	600		4.59
11/20/2020	20	11	2020	2020-11-20	610	639	644	607		-4.09
11/19/2020	19	11	2020	2020-11-19	636	835	835	612		-2.9
11/18/2020	18	11	2020	2020-11-18	655	669	673	644		-3.53
11/17/2020	17	11	2020	2020-11-17	679	674	822	655		2.11
11/16/2020	16	11	2020	2020-11-16	665	687	688	628		0.15
11/13/2020	13	11	2020	2020-11-13	664	689	823	663		-10.99
11/12/2020	12	11	2020	2020-11-12	746	684	749	664		8.43
11/11/2020	11	11	2020	2020-11-11	688	671	705	671		0.15
11/10/2020	10	11	2020	2020-11-10	687	723	741	673		-5.11
11/09/2020	9	11	2020	2020-11-09	724	737	755	690		-2.82
11/06/2020	6	11	2020	2020-11-06	745	741	761	673		0.54
11/05/2020	5	11	2020	2020-11-05	741	707	746	690		4.81
11/04/2020	4	11	2020	2020-11-04	707	772	783	699		-20.65
11/03/2020	3	11	2020	2020-11-03	891	879	937	859		1.37
11/02/2020	2	11	2020	2020-11-02	879	859	914	859		2.33
10/30/2020	30	10	2020	2020-10-30	859	890	974	808		-3.16
10/29/2020	29	10	2020	2020-10-29	887	923	923	877		-3.9
10/28/2020	28	10	2020	2020-10-28	923	877	1257	869		5.25
10/27/2020	27	10	2020	2020-10-27	877	825	885	825		6.3
10/26/2020	26	10	2020	2020-10-26	825	792	840	792		4.17
10/23/2020	23	10	2020	2020-10-23	792	831	967	792		-4.69
10/22/2020	22	10	2020	2020-10-22	831	812	845	803		2.34
10/21/2020	21	10	2020	2020-10-21	812	787	820	787		3.18
10/20/2020	20	10	2020	2020-10-20	787	753	813	753		4.52
10/19/2020	19	10	2020	2020-10-19	753	682	757	682		10.41
10/16/2020	16	10	2020	2020-10-16	682	753	769	671		-8.82
10/15/2020	15	10	2020	2020-10-15	748	742	761	724		1.49
10/14/2020	14	10	2020	2020-10-14	737	743	943	716		-0.81
10/13/2020	13	10	2020	2020-10-13	743	763	799	713		-2.62
10/12/2020	12	10	2020	2020-10-12	763	756	777	721		0.93
10/09/2020	9	10	2020	2020-10-09	756	766	766	737		-1.31
10/08/2020	8	10	2020	2020-10-08	766	803	808	744		-4.61
10/07/2020	7	10	2020	2020-10-07	803	806	807	771		2.03
10/06/2020	6	10	2020	2020-10-06	787	796	810	769		-1.13
10/05/2020	5	10	2020	2020-10-05	796	758	807	758		5.01
10/02/2020	2	10	2020	2020-10-02	758	757	781	748		-2.57
10/01/2020	1	10	2020	2020-10-01	778	765	789	758		1.7
09/30/2020	30	9	2020	2020-09-30	765	796	825	761		-3.89
09/29/2020	29	9	2020	2020-09-29	796	784	825	783		1.27
09/28/2020	28	9	2020	2020-09-28	786	761	800	761		3.42
09/25/2020	25	9	2020	2020-09-25	760	781	784	759		-3.43
09/24/2020	24	9	2020	2020-09-24	787	776	804	773		1.42
09/23/2020	23	9	2020	2020-09-23	776	773	780	756		0.39
09/22/2020	22	9	2020	2020-09-22	773	770	781	761		-0.77
09/21/2020	21	9	2020	2020-09-21	779	721	788	721		8.04
09/18/2020	18	9	2020	2020-09-18	721	735	742	699		-1.9
09/17/2020	17	9	2020	2020-09-17	735	743	759	725		-1.08
09/16/2020	16	9	2020	2020-09-16	743	772	792	737		-3.76
09/15/2020	15	9	2020	2020-09-15	772	765	774	737		4.47
09/14/2020	14	9	2020	2020-09-14	739	772	772	728		-4.27
09/11/2020	11	9	2020	2020-09-11	772	813	813	769		-5.04
09/10/2020	10	9	2020	2020-09-10	813	793	823	784		4.63
09/09/2020	9	9	2020	2020-09-09	777	811	824	777		-4.19
09/08/2020	8	9	2020	2020-09-08	811	767	811	767		5.74
09/04/2020	4	9	2020	2020-09-04	767	764	785	761		-7.26
09/03/2020	3	9	2020	2020-09-03	827	805	828	792		2.73
09/02/2020	2	9	2020	2020-09-02	805	825	827	785		-2.42
09/01/2020	1	9	2020	2020-09-01	825	826	864	807		-0.12
08/31/2020	31	8	2020	2020-08-31	826	807	838	807		2.35
08/28/2020	28	8	2020	2020-08-28	807	714	858	714		5.63
08/27/2020	27	8	2020	2020-08-27	764	799	809	757		-4.38
08/26/2020	26	8	2020	2020-08-26	799	780	802	772		-0.62
08/25/2020	25	8	2020	2020-08-25	804	820	822	795		-1.95
08/24/2020	24	8	2020	2020-08-24	820	800	836	800		2.5
08/21/2020	21	8	2020	2020-08-21	800	832	843	793		-3.85
08/20/2020	20	8	2020	2020-08-20	832	851	851	816		-2.23
08/19/2020	19	8	2020	2020-08-19	851	859	868	829		-0.93
08/18/2020	18	8	2020	2020-08-18	859	784	873	784		9.57
08/17/2020	17	8	2020	2020-08-17	784	776	791	768		1.03
08/14/2020	14	8	2020	2020-08-14	776	802	806	773		-3.24
08/13/2020	13	8	2020	2020-08-13	802	797	829	784		0.63
08/12/2020	12	8	2020	2020-08-12	797	784	809	771		1.66
08/11/2020	11	8	2020	2020-08-11	784	766	787	759		2.35
08/10/2020	10	8	2020	2020-08-10	766	813	813	596		-4.37
08/07/2020	7	8	2020	2020-08-07	801	852	852	798		-5.99
08/06/2020	6	8	2020	2020-08-06	852	880	885	848		-3.18
08/05/2020	5	8	2020	2020-08-05	880	912	912	876		4.14
08/04/2020	4	8	2020	2020-08-04	845	859	859	831		-1.63
08/03/2020	3	8	2020	2020-08-03	859	856	872	823		0.35
07/31/2020	31	7	2020	2020-07-31	856	879	879	841		-2.73
07/30/2020	30	7	2020	2020-07-30	880	820	882	820		4.64
07/29/2020	29	7	2020	2020-07-29	841	838	862	789		0.36
07/28/2020	28	7	2020	2020-07-28	838	859	859	809		-2.44
07/27/2020	27	7	2020	2020-07-27	859	739	861	739		16.24
07/24/2020	24	7	2020	2020-07-24	739	721	747	714		2.5
07/23/2020	23	7	2020	2020-07-23	721	682	722	679		5.72
07/22/2020	22	7	2020	2020-07-22	682	688	717	679		-0.87
07/21/2020	21	7	2020	2020-07-21	688	678	695	624		1.47
07/20/2020	20	7	2020	2020-07-20	678	675	678	630		0.44
07/17/2020	17	7	2020	2020-07-17	675	638	697	638		5.8
07/16/2020	16	7	2020	2020-07-16	638	713	713	587		-10.52
07/15/2020	15	7	2020	2020-07-15	713	704	730	699		1.28
07/14/2020	14	7	2020	2020-07-14	704	688	745	688		2.33
07/13/2020	13	7	2020	2020-07-13	688	673	732	667		2.53
07/10/2020	10	7	2020	2020-07-10	671	703	703	661		-4.55
07/09/2020	9	7	2020	2020-07-09	703	692	725	683		1.59
07/08/2020	8	7	2020	2020-07-08	692	697	705	671		-0.72
07/07/2020	7	7	2020	2020-07-07	697	692	710	678		0.72
07/06/2020	6	7	2020	2020-07-06	692	668	724	668		3.59
07/02/2020	2	7	2020	2020-07-02	668	727	727	666		-8.12
07/01/2020	1	7	2020	2020-07-01	727	774	782	676		-6.07
06/30/2020	30	6	2020	2020-06-30	774	773	841	741		0.13
06/29/2020	29	6	2020	2020-06-29	773	761	884	754		1.58
06/26/2020	26	6	2020	2020-06-26	761	795	857	751		-4.28
06/25/2020	25	6	2020	2020-06-25	795	828	891	788		-3.99
06/24/2020	24	6	2020	2020-06-24	828	803	918	803		3.11
06/23/2020	23	6	2020	2020-06-23	803	798	897	798		0.63
06/22/2020	22	6	2020	2020-06-22	798	803	859	798		0.13
06/19/2020	19	6	2020	2020-06-19	797	829	866	794		-3.86
06/18/2020	18	6	2020	2020-06-18	829	838	904	817		-1.07
06/17/2020	17	6	2020	2020-06-17	838	876	920	819		-4.23
06/16/2020	16	6	2020	2020-06-16	875	854	955	840		1.63
06/15/2020	15	6	2020	2020-06-15	861	904	1022	852		-4.76
06/12/2020	12	6	2020	2020-06-12	904	896	996	847		0.67
06/11/2020	11	6	2020	2020-06-11	898	828	955	818		7.93
06/10/2020	10	6	2020	2020-06-10	832	783	900	783		5.99
06/09/2020	9	6	2020	2020-06-09	785	740	809	740		6.08
06/08/2020	8	6	2020	2020-06-08	740	730	784	717		1.37
06/05/2020	5	6	2020	2020-06-05	730	742	776	711		-1.62
06/04/2020	4	6	2020	2020-06-04	742	686	775	684		-0.4
06/03/2020	3	6	2020	2020-06-03	745	730	778	713		8.76
06/02/2020	2	6	2020	2020-06-02	685	690	764	677		-0.72
06/01/2020	1	6	2020	2020-06-01	690	690	775	668		2.68
05/29/2020	29	5	2020	2020-05-29	672	734	798	665		-7.95
05/28/2020	28	5	2020	2020-05-28	730	688	776	687		6.1
05/27/2020	27	5	2020	2020-05-27	688	679	712	675		1.33
05/26/2020	26	5	2020	2020-05-26	679	682	754	674		-0.44
05/22/2020	22	5	2020	2020-05-22	682	707	752	678		-3.54
05/21/2020	21	5	2020	2020-05-21	707	725	819	683		-2.48
05/20/2020	20	5	2020	2020-05-20	725	718	777	702		0.97
05/19/2020	19	5	2020	2020-05-19	718	696	799	696		3.16
05/18/2020	18	5	2020	2020-05-18	696	842	966	654		-17.34
05/15/2020	15	5	2020	2020-05-15	842	747	1010	713		-0.47
05/14/2020	14	5	2020	2020-05-14	846	728	965	728		16.21
05/13/2020	13	5	2020	2020-05-13	728	844	912	723		-13.74
05/12/2020	12	5	2020	2020-05-12	844	804	963	733		7.24
05/11/2020	11	5	2020	2020-05-11	787	817	975	777		-3.67
05/08/2020	8	5	2020	2020-05-08	817	823	925	742		-0.73
05/07/2020	7	5	2020	2020-05-07	823	823	928	788		0
05/06/2020	6	5	2020	2020-05-06	823	824	891	801		0.24
05/05/2020	5	5	2020	2020-05-05	821	835	893	791		-1.68
05/04/2020	4	5	2020	2020-05-04	835	802	951	802		4.11
05/01/2020	1	5	2020	2020-05-01	802	802	997	786		0
04/30/2020	30	4	2020	2020-04-30	802	760	874	760		-9.89
04/29/2020	29	4	2020	2020-04-29	890	878	1070	778		1.37
04/28/2020	28	4	2020	2020-04-28	878	962	1124	850		-8.54
04/27/2020	27	4	2020	2020-04-27	960	989	1049	886		-2.93
04/24/2020	24	4	2020	2020-04-24	989	964	1137	924		2.59
04/23/2020	23	4	2020	2020-04-23	964	989	1162	946		-1.93
04/22/2020	22	4	2020	2020-04-22	983	888	1109	874		0.61
04/21/2020	21	4	2020	2020-04-21	977	930	1060	930		5.05
04/20/2020	20	4	2020	2020-04-20	930	924	959	878		0.65
04/17/2020	17	4	2020	2020-04-17	924	995	1045	892		-7.14
04/16/2020	16	4	2020	2020-04-16	995	912	1009	899		8.98
04/15/2020	15	4	2020	2020-04-15	913	873	1070	839		6.29
04/14/2020	14	4	2020	2020-04-14	859	897	904	821		-1.49
04/13/2020	13	4	2020	2020-04-13	872	876	918	855		-0.46
04/09/2020	9	4	2020	2020-04-09	876	943	956	871		-6.21
04/08/2020	8	4	2020	2020-04-08	934	1022	1022	848		-6.69
04/07/2020	7	4	2020	2020-04-07	1001	1048	1115	987		-8.33
04/06/2020	6	4	2020	2020-04-06	1092	1170	1170	1025		-6.67
04/03/2020	3	4	2020	2020-04-03	1170	1231	1542	1144		-3.54
04/02/2020	2	4	2020	2020-04-02	1213	1002	1245	1002		0.66
04/01/2020	1	4	2020	2020-04-01	1205	1218	1597	1079		7.02
03/31/2020	31	3	2020	2020-03-31	1126	1234	1827	1121		-8.6
03/30/2020	30	3	2020	2020-03-30	1232	1188	1278	1107		3.36
03/27/2020	27	3	2020	2020-03-27	1192	1084	1303	1084		2.85
03/26/2020	26	3	2020	2020-03-26	1159	1186	1208	1074		2.93
03/25/2020	25	3	2020	2020-03-25	1126	1274	1279	1048		-21.75
03/24/2020	24	3	2020	2020-03-24	1439	1486	1692	1369		-12.47
03/23/2020	23	3	2020	2020-03-23	1644	1728	1735	1543		-4.86
03/20/2020	20	3	2020	2020-03-20	1728	1807	1807	1578		-4.32
03/19/2020	19	3	2020	2020-03-19	1806	1835	1937	1669		-6.47
03/18/2020	18	3	2020	2020-03-18	1931	1399	2161	1399		35.41
03/17/2020	17	3	2020	2020-03-17	1426	1590	1649	1313		-12.03
03/16/2020	16	3	2020	2020-03-16	1621	1418	2561	1328		14.24
03/13/2020	13	3	2020	2020-03-13	1419	1162	1833	945		22.12
03/12/2020	12	3	2020	2020-03-12	1162	1156	1617	1050		0.52
03/11/2020	11	3	2020	2020-03-11	1156	1068	1206	1058		8.24
03/10/2020	10	3	2020	2020-03-10	1068	1312	1312	959		-18.6
03/09/2020	9	3	2020	2020-03-09	1312	1144	2190	1141		41.23
03/06/2020	6	3	2020	2020-03-06	929	891	1022	852		15.26
03/05/2020	5	3	2020	2020-03-05	806	768	859	685		21.57
03/04/2020	4	3	2020	2020-03-04	663	798	798	634		-16.92
03/03/2020	3	3	2020	2020-03-03	798	820	820	680		-2.68
03/02/2020	2	3	2020	2020-03-02	820	810	849	802		4.86
02/28/2020	28	2	2020	2020-02-28	782	707	794	707		10.61
02/27/2020	27	2	2020	2020-02-27	707	621	707	621		13.85
02/26/2020	26	2	2020	2020-02-26	621	617	627	584		0.65
02/25/2020	25	2	2020	2020-02-25	617	589	629	557		4.75
02/24/2020	24	2	2020	2020-02-24	589	536	606	536		9.89
02/21/2020	21	2	2020	2020-02-21	536	546	569	484		-5.8
02/20/2020	20	2	2020	2020-02-20	569	540	572	522		5.37
02/19/2020	19	2	2020	2020-02-19	540	540	569	512		0
02/18/2020	18	2	2020	2020-02-18	540	522	553	516		3.45
02/14/2020	14	2	2020	2020-02-14	522	538	538	495		-2.97
02/13/2020	13	2	2020	2020-02-13	538	500	543	500		7.6
02/12/2020	12	2	2020	2020-02-12	500	493	520	471		1.42
02/11/2020	11	2	2020	2020-02-11	493	490	507	478		0.61
02/10/2020	10	2	2020	2020-02-10	490	481	499	451		5.83
02/07/2020	7	2	2020	2020-02-07	463	440	473	440		5.23
02/06/2020	6	2	2020	2020-02-06	440	427	463	419		-1.35
02/05/2020	5	2	2020	2020-02-05	446	439	459	418		1.59
02/04/2020	4	2	2020	2020-02-04	439	465	465	430		-5.59
02/03/2020	3	2	2020	2020-02-03	465	465	484	440		0
01/31/2020	31	1	2020	2020-01-31	465	450	495	429		10.98
01/30/2020	30	1	2020	2020-01-30	419	419	435	413		0
01/29/2020	29	1	2020	2020-01-29	419	446	453	414		-6.05
01/28/2020	28	1	2020	2020-01-28	446	463	997	441		-3.67
01/27/2020	27	1	2020	2020-01-27	463	435	473	435		7.67
01/24/2020	24	1	2020	2020-01-24	430	415	432	397		3.61
01/23/2020	23	1	2020	2020-01-23	415	416	432	398		-0.24
01/22/2020	22	1	2020	2020-01-22	416	413	427	397		0.73
01/21/2020	21	1	2020	2020-01-21	413	428	431	401		-3.5
01/17/2020	17	1	2020	2020-01-17	428	415	450	378		1.18
01/16/2020	16	1	2020	2020-01-16	423	430	440	406		-1.63
01/15/2020	15	1	2020	2020-01-15	430	426	445	415		0.94
01/14/2020	14	1	2020	2020-01-14	426	419	484	382		-3.18
01/13/2020	13	1	2020	2020-01-13	440	449	469	406		-2
01/10/2020	10	1	2020	2020-01-10	449	456	456	449		-1.54
01/09/2020	9	1	2020	2020-01-09	456	458	478	441		-3.59
01/08/2020	8	1	2020	2020-01-08	473	496	514	452		-4.64
01/07/2020	7	1	2020	2020-01-07	496	515	531	494		-3.5
01/06/2020	6	1	2020	2020-01-06	514	518	530	506		-0.77
01/03/2020	3	1	2020	2020-01-03	518	535	582	510		-0.77
01/02/2020	2	1	2020	2020-01-02	522	538	538	511		-2.97
12/31/2019	31	12	2019	2019-12-31	538	517	559	517		4.06
12/30/2019	30	12	2019	2019-12-30	517	479	536	479		7.93
12/27/2019	27	12	2019	2019-12-27	479	439	490	439		9.11
12/26/2019	26	12	2019	2019-12-26	439	424	448	424		3.54
12/24/2019	24	12	2019	2019-12-24	424	431	436	424		-1.62
12/23/2019	23	12	2019	2019-12-23	431	457	457	424		-5.69
12/20/2019	20	12	2019	2019-12-20	457	433	462	407		-2.56
12/19/2019	19	12	2019	2019-12-19	469	490	490	430		-4.29
12/18/2019	18	12	2019	2019-12-18	490	485	498	462		-2.2
12/17/2019	17	12	2019	2019-12-17	501	479	564	456		4.59
12/16/2019	16	12	2019	2019-12-16	479	467	514	453		-1.24
12/13/2019	13	12	2019	2019-12-13	485	536	547	471		-9.51
12/12/2019	12	12	2019	2019-12-12	536	517	560	507		1.13
12/11/2019	11	12	2019	2019-12-11	530	514	544	488		3.11
12/10/2019	10	12	2019	2019-12-10	514	515	528	496		-0.19
12/09/2019	9	12	2019	2019-12-09	515	522	552	506		-2.46
12/06/2019	6	12	2019	2019-12-06	528	521	548	495		2.72
12/05/2019	5	12	2019	2019-12-05	514	499	526	486		0
12/04/2019	4	12	2019	2019-12-04	514	515	534	506		-3.38
12/03/2019	3	12	2019	2019-12-03	532	523	545	507		1.72
12/02/2019	2	12	2019	2019-12-02	523	494	528	410		6.3
11/29/2019	29	11	2019	2019-11-29	492	449	495	449		8.61
11/27/2019	27	11	2019	2019-11-27	453	464	501	447		-2.37
11/26/2019	26	11	2019	2019-11-26	464	465	486	456		-3.53
11/25/2019	25	11	2019	2019-11-25	481	501	501	471		-3.99
11/22/2019	22	11	2019	2019-11-22	501	531	531	473		-5.83
11/21/2019	21	11	2019	2019-11-21	532	508	535	486		4.72
11/20/2019	20	11	2019	2019-11-20	508	514	576	496		-4.15
11/19/2019	19	11	2019	2019-11-19	530	538	544	497		-1.49
11/18/2019	18	11	2019	2019-11-18	538	509	556	508		10.02
11/15/2019	15	11	2019	2019-11-15	489	519	564	470		-10.6
11/14/2019	14	11	2019	2019-11-14	547	561	565	509		-2.5
11/13/2019	13	11	2019	2019-11-13	561	513	579	513		-0.18
11/12/2019	12	11	2019	2019-11-12	562	540	591	517		-1.4
11/11/2019	11	11	2019	2019-11-11	570	563	627	563		1.24
11/08/2019	8	11	2019	2019-11-08	563	558	568	526		0.9
11/07/2019	7	11	2019	2019-11-07	558	560	579	541		-0.36
11/06/2019	6	11	2019	2019-11-06	560	572	580	529		-1.75
11/05/2019	5	11	2019	2019-11-05	570	570	602	559		-0.52
11/04/2019	4	11	2019	2019-11-04	573	533	598	530		7.5
11/01/2019	1	11	2019	2019-11-01	533	562	562	517		-4.48
10/31/2019	31	10	2019	2019-10-31	558	570	574	548		-2.45
10/30/2019	30	10	2019	2019-10-30	572	547	582	536		4.57
10/29/2019	29	10	2019	2019-10-29	547	541	560	509		1.86
10/28/2019	28	10	2019	2019-10-28	537	538	553	536		-0.19
10/25/2019	25	10	2019	2019-10-25	538	568	568	534		-4.61
10/24/2019	24	10	2019	2019-10-24	564	583	583	533		-3.26
10/23/2019	23	10	2019	2019-10-23	583	574	593	549		0.34
10/22/2019	22	10	2019	2019-10-22	581	536	597	530		-1.02
10/21/2019	21	10	2019	2019-10-21	587	587	611	580		-6.97
10/18/2019	18	10	2019	2019-10-18	631	632	653	610		-3.37
10/17/2019	17	10	2019	2019-10-17	653	623	698	570		4.82
10/16/2019	16	10	2019	2019-10-16	623	656	656	584		-1.89
10/15/2019	15	10	2019	2019-10-15	635	561	643	548		11.21
10/14/2019	14	10	2019	2019-10-14	571	605	630	531		-8.49
10/11/2019	11	10	2019	2019-10-11	624	583	675	544		2.97
10/10/2019	10	10	2019	2019-10-10	606	583	665	577		3.95
10/09/2019	9	10	2019	2019-10-09	583	602	657	570		-2.83
10/08/2019	8	10	2019	2019-10-08	600	604	705	585		-3.69
10/07/2019	7	10	2019	2019-10-07	623	574	672	574		8.54
10/04/2019	4	10	2019	2019-10-04	574	572	617	551		0.35
10/03/2019	3	10	2019	2019-10-03	572	601	626	567		-6.23
10/02/2019	2	10	2019	2019-10-02	610	589	1074	586		-2.09
10/01/2019	1	10	2019	2019-10-01	623	644	659	586		-4.45
09/30/2019	30	9	2019	2019-09-30	652	615	724	615		6.02
09/27/2019	27	9	2019	2019-09-27	615	625	695	581		-0.97
09/26/2019	26	9	2019	2019-09-26	621	564	673	564		7.07
09/25/2019	25	9	2019	2019-09-25	580	589	607	559		-1.53
09/24/2019	24	9	2019	2019-09-24	589	587	622	547		-32.61
09/23/2019	23	9	2019	2019-09-23	874	874	874	874		0
09/20/2019	20	9	2019	2019-09-20	874	555	1177	549		64.29
09/19/2019	19	9	2019	2019-09-19	532	590	645	524		-9.83
09/18/2019	18	9	2019	2019-09-18	590	647	702	558		-8.81
09/17/2019	17	9	2019	2019-09-17	647	643	673	603		0.62
09/16/2019	16	9	2019	2019-09-16	643	590	682	584		10.67
09/13/2019	13	9	2019	2019-09-13	581	662	662	561		-11.3
09/12/2019	12	9	2019	2019-09-12	655	666	1321	595		-1.65
09/11/2019	11	9	2019	2019-09-11	666	620	772	619		4.39
09/10/2019	10	9	2019	2019-09-10	638	606	728	601		2.57
09/09/2019	9	9	2019	2019-09-09	622	612	669	598		1.8
09/06/2019	6	9	2019	2019-09-06	611	625	625	582		-2.24
09/05/2019	5	9	2019	2019-09-05	625	680	1347	612		-7.82
09/04/2019	4	9	2019	2019-09-04	678	636	706	628		-3.97
09/03/2019	3	9	2019	2019-09-03	706	899	911	664		5.06
08/30/2019	30	8	2019	2019-08-30	672	621	916	608		8.21
08/29/2019	29	8	2019	2019-08-29	621	598	681	584		4.02
08/28/2019	28	8	2019	2019-08-28	597	579	626	564		-3.86
08/27/2019	27	8	2019	2019-08-27	621	636	651	600		-2.36
08/26/2019	26	8	2019	2019-08-26	636	675	697	626		-5.78
08/23/2019	23	8	2019	2019-08-23	675	567	1005	553		19.05
08/22/2019	22	8	2019	2019-08-22	567	625	674	546		-8.7
08/21/2019	21	8	2019	2019-08-21	621	575	998	574		-0.96
08/20/2019	20	8	2019	2019-08-20	627	678	678	610		-7.52
08/19/2019	19	8	2019	2019-08-19	678	607	720	607		11.7
08/16/2019	16	8	2019	2019-08-16	607	671	693	540		-5.45
08/15/2019	15	8	2019	2019-08-15	642	645	700	606		-1.98
08/14/2019	14	8	2019	2019-08-14	655	643	668	599		1.71
08/13/2019	13	8	2019	2019-08-13	644	631	1235	513		2.06
08/12/2019	12	8	2019	2019-08-12	631	636	692	612		-0.79
08/09/2019	9	8	2019	2019-08-09	636	655	684	624		-2.9
08/08/2019	8	8	2019	2019-08-08	655	676	686	626		-3.11
08/07/2019	7	8	2019	2019-08-07	676	652	711	652		3.68
08/06/2019	6	8	2019	2019-08-06	652	699	699	618		-6.72
08/05/2019	5	8	2019	2019-08-05	699	681	708	669		12.92
08/02/2019	2	8	2019	2019-08-02	619	615	640	591		-0.48
08/01/2019	1	8	2019	2019-08-01	622	568	688	568		8.17
07/31/2019	31	7	2019	2019-07-31	575	579	631	544		-1.03
07/30/2019	30	7	2019	2019-07-30	581	565	678	565		-2.52
07/29/2019	29	7	2019	2019-07-29	596	578	665	571		4.75
07/26/2019	26	7	2019	2019-07-26	569	591	597	551		-3.72
07/25/2019	25	7	2019	2019-07-25	591	580	611	576		-5.59
07/24/2019	24	7	2019	2019-07-24	626	592	686	570		5.74
07/23/2019	23	7	2019	2019-07-23	592	583	614	573		6.86
07/22/2019	22	7	2019	2019-07-22	554	580	601	551		-4.32
07/19/2019	19	7	2019	2019-07-19	579	568	625	554		3.39
07/18/2019	18	7	2019	2019-07-18	560	538	594	530		4.28
07/17/2019	17	7	2019	2019-07-17	537	531	579	513		1.7
07/16/2019	16	7	2019	2019-07-16	528	536	573	512		0.76
07/15/2019	15	7	2019	2019-07-15	524	536	556	511		-0.38
07/12/2019	12	7	2019	2019-07-12	526	518	568	508		1.54
07/11/2019	11	7	2019	2019-07-11	518	515	547	491		0.19
07/10/2019	10	7	2019	2019-07-10	517	522	639	505		-0.58
07/09/2019	9	7	2019	2019-07-09	520	520	558	516		0.58
07/08/2019	8	7	2019	2019-07-08	517	532	548	516		-2.08
07/05/2019	5	7	2019	2019-07-05	528	550	571	498		-4
07/03/2019	3	7	2019	2019-07-03	550	536	562	526		1.66
07/02/2019	2	7	2019	2019-07-02	541	527	554	518		-4.42
07/01/2019	1	7	2019	2019-07-01	566	570	580	542		-9
06/28/2019	28	6	2019	2019-06-28	622	591	622	570		5.25
06/27/2019	27	6	2019	2019-06-27	591	585	994	541		-1.17
06/26/2019	26	6	2019	2019-06-26	598	622	652	584		-3.86
06/25/2019	25	6	2019	2019-06-25	622	618	635	598		0.65
06/24/2019	24	6	2019	2019-06-24	618	588	630	588		4.22
06/21/2019	21	6	2019	2019-06-21	593	540	628	524		-0.67
06/20/2019	20	6	2019	2019-06-20	597	555	630	543		15.92
06/19/2019	19	6	2019	2019-06-19	515	557	666	511		-7.04
06/18/2019	18	6	2019	2019-06-18	554	579	609	550		-0.89
06/17/2019	17	6	2019	2019-06-17	559	575	726	541		-2.78
06/14/2019	14	6	2019	2019-06-14	575	562	607	544		1.59
06/13/2019	13	6	2019	2019-06-13	566	576	605	550		-2.58
06/12/2019	12	6	2019	2019-06-12	581	585	614	557		-2.84
06/11/2019	11	6	2019	2019-06-11	598	601	624	582		-4.78
06/10/2019	10	6	2019	2019-06-10	628	625	659	608		0.48
06/07/2019	7	6	2019	2019-06-07	625	610	641	579		-0.16
06/06/2019	6	6	2019	2019-06-06	626	632	655	602		-0.95
06/05/2019	5	6	2019	2019-06-05	632	668	945	622		-2.32
06/04/2019	4	6	2019	2019-06-04	647	596	1094	596		-1.37
06/03/2019	3	6	2019	2019-06-03	656	599	726	569		16.31
05/31/2019	31	5	2019	2019-05-31	564	549	577	521		5.42
05/30/2019	30	5	2019	2019-05-30	535	536	571	524		-4.8
05/29/2019	29	5	2019	2019-05-29	562	569	582	551		-2.43
05/28/2019	28	5	2019	2019-05-28	576	549	643	534		1.41
05/24/2019	24	5	2019	2019-05-24	568	563	610	530		-4.22
05/23/2019	23	5	2019	2019-05-23	593	594	629	556		8.01
05/22/2019	22	5	2019	2019-05-22	549	564	585	505		0.18
05/21/2019	21	5	2019	2019-05-21	548	538	578	533		-3.01
05/20/2019	20	5	2019	2019-05-20	565	578	630	542		-2.25
05/17/2019	17	5	2019	2019-05-17	578	556	611	518		3.21
05/16/2019	16	5	2019	2019-05-16	560	512	594	510		2.56
05/15/2019	15	5	2019	2019-05-15	546	583	631	421		-3.19
05/14/2019	14	5	2019	2019-05-14	564	584	602	536		-1.91
05/13/2019	13	5	2019	2019-05-13	575	584	594	518		1.95
05/10/2019	10	5	2019	2019-05-10	564	579	601	540		-7.84
05/09/2019	9	5	2019	2019-05-09	612	604	1022	587		0.99
05/08/2019	8	5	2019	2019-05-08	606	607	630	592		-0.16
05/07/2019	7	5	2019	2019-05-07	607	578	767	575		3.41
05/06/2019	6	5	2019	2019-05-06	587	554	600	554		5.96
05/03/2019	3	5	2019	2019-05-03	554	577	582	546		-3.99
05/02/2019	2	5	2019	2019-05-02	577	554	603	553		-2.53
05/01/2019	1	5	2019	2019-05-01	592	587	662	579		-1.5
04/30/2019	30	4	2019	2019-04-30	601	618	627	582		-2.75
04/29/2019	29	4	2019	2019-04-29	618	601	638	594		2.83
04/26/2019	26	4	2019	2019-04-26	601	581	742	558		-3.69
04/25/2019	25	4	2019	2019-04-25	624	625	672	610		-0.16
04/24/2019	24	4	2019	2019-04-24	625	554	654	552		19.05
04/23/2019	23	4	2019	2019-04-23	525	502	549	496		4.58
04/22/2019	22	4	2019	2019-04-22	502	526	526	490		-0.59
04/18/2019	18	4	2019	2019-04-18	505	475	610	465		-1.56
04/17/2019	17	4	2019	2019-04-17	513	499	833	477		2.81
04/16/2019	16	4	2019	2019-04-16	499	500	532	476		-0.2
04/15/2019	15	4	2019	2019-04-15	500	482	556	458		2.46
04/12/2019	12	4	2019	2019-04-12	488	491	502	469		-0.81
04/11/2019	11	4	2019	2019-04-11	492	518	572	482		-5.02
04/10/2019	10	4	2019	2019-04-10	518	543	614	510		-4.6
04/09/2019	9	4	2019	2019-04-09	543	554	572	540		-3.38
04/08/2019	8	4	2019	2019-04-08	562	540	580	540		4.07
04/05/2019	5	4	2019	2019-04-05	540	551	568	525		-6.25
04/04/2019	4	4	2019	2019-04-04	576	587	598	566		-1.87
04/03/2019	3	4	2019	2019-04-03	587	611	644	570		-3.93
04/02/2019	2	4	2019	2019-04-02	611	584	626	584		4.62
04/01/2019	1	4	2019	2019-04-01	584	594	615	579		-2.18
03/29/2019	29	3	2019	2019-03-29	597	653	945	573		-8.58
03/28/2019	28	3	2019	2019-03-28	653	651	682	634		0.31
03/27/2019	27	3	2019	2019-03-27	651	641	675	632		1.56
03/26/2019	26	3	2019	2019-03-26	641	623	695	604		2.89
03/25/2019	25	3	2019	2019-03-25	623	604	646	604		3.15
03/22/2019	22	3	2019	2019-03-22	604	632	657	581		-4.43
03/21/2019	21	3	2019	2019-03-21	632	586	658	575		12.46
03/20/2019	20	3	2019	2019-03-20	562	555	1167	552		1.26
03/19/2019	19	3	2019	2019-03-19	555	552	1412	532		0.54
03/18/2019	18	3	2019	2019-03-18	552	565	565	537		-2.3
03/15/2019	15	3	2019	2019-03-15	565	568	708	512		-0.53
03/14/2019	14	3	2019	2019-03-14	568	587	605	557		-3.24
03/13/2019	13	3	2019	2019-03-13	587	575	634	568		-6.68
03/12/2019	12	3	2019	2019-03-12	629	940	940	587		-33.09
03/11/2019	11	3	2019	2019-03-11	940	639	940	564		47.1
03/08/2019	8	3	2019	2019-03-08	639	683	683	616		-6.44
03/07/2019	7	3	2019	2019-03-07	683	630	895	628		8.41
03/06/2019	6	3	2019	2019-03-06	630	629	656	629		0.16
03/05/2019	5	3	2019	2019-03-05	629	600	665	599		-0.16
03/04/2019	4	3	2019	2019-03-04	630	607	896	607		3.79
03/01/2019	1	3	2019	2019-03-01	607	610	641	599		-1.62
02/28/2019	28	2	2019	2019-02-28	617	622	655	606		-0.8
02/27/2019	27	2	2019	2019-02-27	622	614	630	604		1.3
02/26/2019	26	2	2019	2019-02-26	614	623	627	581		-1.44
02/25/2019	25	2	2019	2019-02-25	623	633	719	615		-1.27
02/22/2019	22	2	2019	2019-02-22	631	625	671	615		-3.81
02/21/2019	21	2	2019	2019-02-21	656	670	703	646		-2.09
02/20/2019	20	2	2019	2019-02-20	670	671	912	650		-0.15
02/19/2019	19	2	2019	2019-02-19	671	683	692	658		-1.76
02/15/2019	15	2	2019	2019-02-15	683	672	722	659		1.64
02/14/2019	14	2	2019	2019-02-14	672	678	1269	656		-0.88
02/13/2019	13	2	2019	2019-02-13	678	654	701	644		3.67
02/12/2019	12	2	2019	2019-02-12	654	681	698	648		-3.96
02/11/2019	11	2	2019	2019-02-11	681	653	716	653		4.29
02/08/2019	8	2	2019	2019-02-08	653	655	699	627		-0.31
02/07/2019	7	2	2019	2019-02-07	655	658	701	647		-0.46
02/06/2019	6	2	2019	2019-02-06	658	631	680	619		4.28
02/05/2019	5	2	2019	2019-02-05	631	631	640	618		-1.87
02/04/2019	4	2	2019	2019-02-04	643	628	1454	618		2.39
02/01/2019	1	2	2019	2019-02-01	628	653	653	617		-3.83
01/31/2019	31	1	2019	2019-01-31	653	666	698	651		-2.97
01/30/2019	30	1	2019	2019-01-30	673	684	982	656		-1.61
01/29/2019	29	1	2019	2019-01-29	684	697	752	680		-1.87
01/28/2019	28	1	2019	2019-01-28	697	661	735	661		5.45
01/25/2019	25	1	2019	2019-01-25	661	681	682	647		-2.94
01/24/2019	24	1	2019	2019-01-24	681	675	933	644		-0.58
01/23/2019	23	1	2019	2019-01-23	685	695	698	675		-1.44
01/22/2019	22	1	2019	2019-01-22	695	726	726	690		2.51
01/18/2019	18	1	2019	2019-01-18	678	653	724	650		-2.59
01/17/2019	17	1	2019	2019-01-17	696	695	716	667		-2.25
01/16/2019	16	1	2019	2019-01-16	712	732	1237	690		-2.73
01/15/2019	15	1	2019	2019-01-15	732	729	745	659		3.39
01/14/2019	14	1	2019	2019-01-14	708	717	724	685		1
01/11/2019	11	1	2019	2019-01-11	701	696	759	686		-1.41
01/10/2019	10	1	2019	2019-01-10	711	740	886	695		-3.92
01/09/2019	9	1	2019	2019-01-09	740	716	758	715		3.64
01/08/2019	8	1	2019	2019-01-08	714	716	731	706		-3.12
01/07/2019	7	1	2019	2019-01-07	737	725	755	719		1.1
01/04/2019	4	1	2019	2019-01-04	729	744	769	723		-7.95
01/03/2019	3	1	2019	2019-01-03	792	791	1097	740		2.59
01/02/2019	2	1	2019	2019-01-02	772	788	883	756		3.49
12/31/2018	31	12	2018	2018-12-31	746	765	773	741		-1.45
12/28/2018	28	12	2018	2018-12-28	757	758	766	738		-0.13
12/27/2018	27	12	2018	2018-12-27	758	769	807	613		-1.17
12/26/2018	26	12	2018	2018-12-26	767	759	781	759		2.54
12/24/2018	24	12	2018	2018-12-24	748	700	770	700		7.01
12/21/2018	21	12	2018	2018-12-21	699	680	742	660		-5.03
12/20/2018	20	12	2018	2018-12-20	736	675	912	655		9.04
12/19/2018	19	12	2018	2018-12-19	675	734	1327	575		-3.71
12/18/2018	18	12	2018	2018-12-18	701	710	728	657		2.04
12/17/2018	17	12	2018	2018-12-17	687	700	706	644		-3.1
12/14/2018	14	12	2018	2018-12-14	709	701	729	644		1.14
12/13/2018	13	12	2018	2018-12-13	701	707	908	698		-7.52
12/12/2018	12	12	2018	2018-12-12	758	778	791	735		-2.82
12/11/2018	11	12	2018	2018-12-11	780	779	807	747		0.65
12/10/2018	10	12	2018	2018-12-10	775	761	797	755		3.89
12/07/2018	7	12	2018	2018-12-07	746	798	798	695		-6.52
12/06/2018	6	12	2018	2018-12-06	798	793	1145	757		2.18
12/04/2018	4	12	2018	2018-12-04	781	758	804	733		3.86
12/03/2018	3	12	2018	2018-12-03	752	746	772	700		-4.81
11/30/2018	30	11	2018	2018-11-30	790	790	799	749		0
11/29/2018	29	11	2018	2018-11-29	790	777	835	761		1.15
11/28/2018	28	11	2018	2018-11-28	781	775	828	749		0.13
11/27/2018	27	11	2018	2018-11-27	780	768	836	727		1.56
11/26/2018	26	11	2018	2018-11-26	768	788	788	755		-2.54
11/23/2018	23	11	2018	2018-11-23	788	793	831	781		-1.62
11/21/2018	21	11	2018	2018-11-21	801	825	2012	781		-4.87
11/20/2018	20	11	2018	2018-11-20	842	832	874	800		4.47
11/19/2018	19	11	2018	2018-11-19	806	819	850	801		-5.62
11/16/2018	16	11	2018	2018-11-16	854	911	1409	813		-7.58
11/15/2018	15	11	2018	2018-11-15	924	951	1199	758		-3.35
11/14/2018	14	11	2018	2018-11-14	956	878	1014	855		4.82
11/13/2018	13	11	2018	2018-11-13	912	867	970	852		2.13
11/12/2018	12	11	2018	2018-11-12	893	866	917	838		11.07
11/09/2018	9	11	2018	2018-11-09	804	786	895	781		0.88
11/08/2018	8	11	2018	2018-11-08	797	760	797	700		2.57
11/07/2018	7	11	2018	2018-11-07	777	809	809	752		-7.39
11/06/2018	6	11	2018	2018-11-06	839	806	850	800		2.57
11/05/2018	5	11	2018	2018-11-05	818	807	893	741		3.68
11/02/2018	2	11	2018	2018-11-02	789	813	842	767		-2.95
11/01/2018	1	11	2018	2018-11-01	813	821	855	756		-2.17
10/31/2018	31	10	2018	2018-10-31	831	819	839	801		1.22
10/30/2018	30	10	2018	2018-10-30	821	802	842	796		1.23
10/29/2018	29	10	2018	2018-10-29	811	802	1657	792		1.12
10/26/2018	26	10	2018	2018-10-26	802	809	843	760		0.25
10/25/2018	25	10	2018	2018-10-25	800	765	824	765		-3.38
10/24/2018	24	10	2018	2018-10-24	828	769	836	714		7.67
10/23/2018	23	10	2018	2018-10-23	769	756	803	755		-0.65
10/22/2018	22	10	2018	2018-10-22	774	746	788	716		2.79
10/19/2018	19	10	2018	2018-10-19	753	780	797	721		-3.46
10/18/2018	18	10	2018	2018-10-18	780	745	802	721		5.12
10/17/2018	17	10	2018	2018-10-17	742	739	757	677		0.41
10/16/2018	16	10	2018	2018-10-16	739	716	777	656		-3.9
10/15/2018	15	10	2018	2018-10-15	769	731	845	697		0.26
10/12/2018	12	10	2018	2018-10-12	767	805	805	745		-1.79
10/11/2018	11	10	2018	2018-10-11	781	772	1270	707		0.77
10/10/2018	10	10	2018	2018-10-10	775	809	833	737		-4.2
10/09/2018	9	10	2018	2018-10-09	809	790	839	761		2.41
10/08/2018	8	10	2018	2018-10-08	790	784	815	770		4.08
10/05/2018	5	10	2018	2018-10-05	759	739	781	729		-2.44
10/04/2018	4	10	2018	2018-10-04	778	739	862	739		-3.47
10/03/2018	3	10	2018	2018-10-03	806	772	811	695		4.13
10/02/2018	2	10	2018	2018-10-02	774	777	787	766		1.71

## Sheet: All
Date	GBI	CBI	VIXIE	VIX	EVZ	MOVE	OVX	GVZ	VSTOXX
2020-05-01	1035.15	117.711	87.07	37.19	802	48.11	110.18	24.25	38.32
2020-05-04	1033.03	117.409	91.68	35.97	835	49.25	97.42	23.68	38.32
2020-05-05	1034.72	117.543	89.39	33.61	821	49.65	97.27	24.97	34.51
2020-05-06	1031.41	117.126	89.6	34.12	823	51.31	115.39	24.47	34.81
2020-05-07	1032.48	117.192	88.69	31.44	823	54.93	110.62	26.15	32.43
2020-05-08	1032.35	117.192	88.69	27.98	817	57.4	98.7	24.89	29.66
2020-05-11	1031.7	117.097	83.16	27.57	787	61.6	109.72	23.55	29.91
2020-05-12	1031.06	116.962	80.6	33.04	844	61.26	86.86	22.45	27.67
2020-05-13	1030.91	116.898	81.69	35.28	728	57.56	82.83	22.71	33.42
2020-05-14	1029.61	116.615	84.86	32.61	846	59.05	80.05	24.15	36.32
2020-05-15	1029.55	116.591	82.97	31.89	842	56.53	76.39	23.63	34.47
2020-05-18	1027.93	116.441	73.5	29.3	696	58.7	76.14	22.81	29.06
2020-05-19	1027.8	116.481	67.59	30.53	718	60.09	73.22	21.33	30.17
2020-05-20	1029.65	116.699	61.91	27.99	725	58.85	73.62	20.12	29.11
2020-05-21	1032.6	117.058	62.52	29.53	707	55.62	89.06	19.74	32.31
2020-05-22	1032.27	117.059	63.19	28.16	682	51.67	84.98	18.95	31.42
2020-05-25	1032.28	117.059	63.19		#N/A	#N/A	#N/A	#N/A	29.16
2020-05-26	1032.83	117.184	57.88	28.01	679	52.22	75.47	18.57	28.04
2020-05-27	1035.73	117.6	54.9	27.62	688	52.98	73.89	18.51	29.4
2020-05-28	1037.26	117.762	54.95	28.59	730	50.57	72.98	18.1	29.01
2020-05-29	1038.99	117.924	57.72	27.51	672	51.55	69.23	18.15	31.13
2020-06-01	1038.06	117.77	57.11	28.23	690	55.07	64.38	18.06	30.1
2020-06-02	1040.15	118.066	53.08	26.84	685	55.35	64.71	18.1	30.68
2020-06-03	1041.3	118.288	50.2	25.66	745	61.24	65.73	18.47	29.61
2020-06-04	1043.62	118.7	50.34	25.81	742	61.18	65.13	18.05	27.66
2020-06-05	1049.49	119.303	45.8	24.52	730	61.97	64.2	18.17	27.89
2020-06-08	1054	119.731	49.78	25.81	740	62.77	67.24	17.94	28.12
2020-06-09	1052.62	119.483	56.28	27.57	785	62.94	67.76	19	29.75
2020-06-10	1052.19	119.34	58.96	27.57	832	60.02	63.06	20.75	30.05
2020-06-11	1053.25	119.307	65.25	40.79	898	56.47	69.96	23.04	36.02
2020-06-12	1054.2	119.376	64.12	36.09	904	55.81	70.22	20.39	41.41
2020-06-15	1053.29	119.246	66.93	34.4	861	58.09	68.11	20.11	38.41
2020-06-16	1056.63	119.785	56.47	33.67	875	60.49	66.63	19.29	36.1
2020-06-17	1056.71	119.71	57.37	33.47	838	58.16	61.45	18.88	35.36
2020-06-18	1055.8	119.569	61.82	32.94	829	55.15	61.35	18.31	35.05
2020-06-19	1056.22	119.583	60.77	35.12	797	53.4523	58.73	18.27	32.21
2020-06-22	1057.03	119.612	64.14	31.77	798	53.9318	56.76	19.55	33.78
2020-06-23	1055.51	119.459	57.27	31.37	803	54.04	58.83	20.51	31.34
2020-06-24	1056.14	119.519	65.1	33.84	828	54.89	64.96	20.01	36.81
2020-06-25	1056.86	119.549	66.96	32.22	795	51.57	62.69	19.73	34.68
2020-06-26	1057.05	119.548	67.08	34.73	761	51.21	63.69	20.52	35.17
2020-06-29	1056.27	119.454	65.53	31.78	773	52.96	60.04	19.26	34.49
2020-06-30	1056.35	119.471	58.92	30.43	774	54.13	57.66	19.65	31.72
2020-07-01	1052.37	119.209	57.12	28.62	727	53.28	53.43	18.85	30.13
2020-07-02	1055.75	119.59	53.95	27.68	668	50.96	51.29	17.7	27.59
2020-07-03	1056.26	119.652	53.74		#N/A	#N/A	51.29	#N/A	28.27
2020-07-06	1056.9	119.77	48.68	27.94	692	52.03	50.73	17.42	27.6
2020-07-07	1056.2	119.734	49.94	29.43	697	50.98	51.39	17.37	27.93
2020-07-08	1056.99	119.774	50.37	28.08	692	49.8	48.85	17.74	29.57
2020-07-09	1058.37	119.915	47.12	29.26	703	50.07	53.77	17.39	30.45
2020-07-10	1058.79	119.936	47.56	27.29	671	49.19	49.71	16.64	28.43
2020-07-13	1056.59	119.711	44.53	32.19	688	49.55	53.41	16.53	27.14
2020-07-14	1058.14	119.91	46.14	29.52	704	50.81	53.04	16	28.93
2020-07-15	1059.73	120.096	44.75	27.76	713	47.08	47.05	15.36	27.57
2020-07-16	1061.83	120.335	45.95	28	638	46.43	46.12	15.37	26.81
2020-07-17	1061.52	120.325	46.57	25.68	675	45.68	40.22	15.09	25.58
2020-07-20	1062.93	120.522	42.83	24.46	678	46.82	42.59	15.3	24.21
2020-07-21	1064.56	120.76	40.08	24.84	688	46.45	41.1	16.67	23.49
2020-07-22	1067.12	121.006	40.74	24.32	682	45.32	41.3	22.45	24.21
2020-07-23	1067.17	121.013	40.34	26.08	721	43.93	43.83	21.99	23.31
2020-07-24	1065.47	120.83	40.87	25.84	739	42.48	42.35	21.61	25.58
2020-07-27	1067.75	121.062	42.09	24.74	859	42.61	41.37	25.52	25.24
2020-07-28	1069.04	121.2	43.94	25.44	838	41.27	41.09	28.96	24.4
2020-07-29	1068.59	121.129	42.75	24.1	841	41.63	39.58	26.79	24.23
2020-07-30	1070.03	121.26	44.66	24.76	880	40.66	42.06	24.13	28.02
2020-07-31	1070.01	121.212	43.62	24.46	856	41.98	44.43	24.46	26.66
2020-08-03	1068.96	121.114	41.3	24.28	859	43.13	41.56	23.56	25.76
2020-08-04	1070.56	121.32	39.31	23.76	845	44.11	40.28	26.3	25.09
2020-08-05	1069.93	121.186	38.25	22.99	880	41.75	37.12	25.69	23.94
2020-08-06	1071.91	121.41	37.43	22.65	852	42.6	37.59	27.36	24.94
2020-08-07	1071.41	121.355	35.76	22.21	801	41.46	37.43	26.22	24.2
2020-08-10	1073.31	121.58	35.96	22.13	766	42.21	35.74	23.89	24.11
2020-08-11	1072.27	121.507	33.93	24.03	784	45.26	37.5	27.48	23.39
2020-08-12	1071.89	121.478	31.66	22.28	797	44.23	34.74	25.85	22.47
2020-08-13	1070.51	121.333	33.41	22.13	802	45.08	34.87	25.82	22.69
2020-08-14	1071.08	121.367	34.69	22.05	776	43.09	35.1	23.53	23.87
2020-08-17	1072.5	121.514	35.06	21.35	784	45.81	32.43	26.35	22.78
2020-08-18	1073.06	121.582	36	21.51	859	46.06	31.7	26.46	23.27
2020-08-19	1073.74	121.672	36.74	22.54	851	44.6	32.85	28.15	21.99
2020-08-20	1074.73	121.763	38.34	22.72	832	44.58	32.83	25.91	24.04
2020-08-21	1075.26	121.812	37.8	22.54	800	45.14	33.68	25.96	24.34
2020-08-24	1075.1	121.812	35.99	22.37	820	46.33	32.25	23.86	23.11
2020-08-25	1072.03	121.493	37.02	22.03	804	47.89	33.03	22.76	23.36
2020-08-26	1071.43	121.414	36.95	23.27	799	47.99	33.79	24.79	22
2020-08-27	1070.86	121.356	35.89	24.47	764	49.29	33.74	23.08	23.56
2020-08-28	1072.04	121.444	35.36	22.96	807	48.19	32.06	23.19	25.16
2020-08-31	1071.33	121.419	35.36	26.41	826	47.02	32.59	24.32	26.72
2020-09-01	1072.52	121.503	33.74	26.12	825	44.3	31.74	23	27.12
2020-09-02	1075.71	121.84	31.62	26.57	805	44.86	35.49	23.57	26.61
2020-09-03	1076.96	121.99	33.99	33.6	827	45.76	41.28	23.68	29.01
2020-09-04	1075.85	121.854	36.39	30.75	767	47.04	44.02	21.98	31.71
2020-09-07	1075.63	121.799	35.77		#N/A	#N/A	#N/A	#N/A	27.92
2020-09-08	1076.63	121.898	37.28	31.46	811	50.68	55.9	22.49	28.45
2020-09-09	1075.14	121.706	34.73	28.81	777	48.82	49.42	21.66	25.89
2020-09-10	1073.4	121.542	33.37	29.71	813	45.21	52.16	21.26	25.01
2020-09-11	1076.08	121.803	37.07	26.87	772	43.12	50.13	20.2	23.72
2020-09-14	1076.24	121.829	35.69	25.85	739	44.21	49.41	20.91	22.57
2020-09-15	1076.37	121.839	34.95	25.59	772	43.06	45.19	20.32	22.12
2020-09-16	1076.27	121.834	34.86	26.04	743	42.43	41.13	20.08	21.99
2020-09-17	1077.59	121.984	36.57	26.46	735	38.45	38.73	19.95	22.55
2020-09-18	1077.18	121.955	37.34	25.83	721	37.24	39.07	20.22	22.65
2020-09-21	1078.08	122.035	47.86	27.78	779	38.63	42.89	21.6	29.88
2020-09-22	1076.8	121.842	48.95	26.86	773	39.35	41.28	21.63	28.11
2020-09-23	1076.27	121.793	47.99	28.58	776	38.63	44.64	23.43	27.17
2020-09-24	1076.17	121.69	55.49	28.51	787	37.22	42.88	23.41	28.34
2020-09-25	1076.27	121.67	55.38	26.38	760	36.97	41.41	22.09	27.81
2020-09-28	1076.31	121.696	51.53	26.19	786	37.4	40.64	22.01	26.82
2020-09-29	1077.08	121.795	52.08	26.27	796	36.62	46.13	23.28	26.9
2020-09-30	1076.56	121.754	50.2	26.37	765	39.21	44	22.07	26.06
2020-10-01	1076.83	121.911	49.25	26.7	778	38.65	49.35	22.39	26.54
2020-10-02	1077.17	121.958	48.79	27.63	758	39.97	55.51	22.59	26.82
2020-10-05	1077.34	122.011	46.54	27.96	796	39.81	49.44	22.13	26.28
2020-10-06	1077.92	122.126	42.01	29.48	787	57.75	46.6	22.79	25.21
2020-10-07	1077.98	122.119	40.56	28.06	803	56.98	45.5	23.28	24.97
2020-10-08	1079.63	122.299	39.93	26.36	766	57.31	41.15	21.96	23.98
2020-10-09	1080.54	122.381	38.85	25	756	57.52	42.38	22.44	22.24
2020-10-12	1081.06	122.463	37.58	25.07	763	#N/A	44.04	22.66	22.25
2020-10-13	1082.11	122.568	39.19	26.07	743	55.59	46.07	23.17	22.94
2020-10-14	1082.9	122.641	41.51	26.4	737	53.5	43.53	21.88	23.24
2020-10-15	1083.89	122.714	48.18	26.97	748	55.62	43.83	21.73	26.84
2020-10-16	1084.6	122.788	42.58	27.41	682	57.25	44.06	20.29	25.32
2020-10-19	1085.27	122.86	43.03	29.18	753	61.16	43.35	21.33	26.62
2020-10-20	1084.56	122.789	44.16	29.35	787	60.42	43.85	21.54	27.63
2020-10-21	1084.4	122.798	44.09	28.65	812	59.07	47.58	22.66	29.45
2020-10-22	1083.05	122.649	45.61	28.11	831	59.73	46.61	21.38	28.99
2020-10-23	1083.34	122.686	45.41	27.55	792	58.46	46.32	21.04	28.16
2020-10-26	1083.19	122.676	50.1	32.46	825	58.95	53.05	20.93	31.76
2020-10-27	1085.19	122.862	52.34	33.35	877	57.88	50.22	20.41	32.74
2020-10-28	1084.46	122.722	65.97	40.28	923	57.13	59.61	21.93	38.26
2020-10-29	1084.87	122.744	64.51	37.59	887	61.3	63.38	21.9	37.55
2020-10-30	1083.98	122.645	63.42	38.02	859	61.91	68.84	23.26	35.35
2020-11-02	1084.2	122.681	59.94	37.13	879	63.56	66.73	23.74	35.23
2020-11-03	1084.38	122.767	54.96	35.55	891	64.37	63.63	23.32	32.76
2020-11-04	1085.56	122.919	47.59	29.57	707	47.74	54.53	20.49	28
2020-11-05	1086.66	123.137	40.5	27.58	741	43.76	53.69	22	26.37
2020-11-06	1086.91	123.153	38.48	24.86	745	39.88	55.75	21.1	25.62
2020-11-09	1085.64	123.121	37.11	25.75	724	44.94	52.2	21.86	23.86
2020-11-10	1085.89	123.105	38.18	24.8	687	46.19	49.64	20.46	25.08
2020-11-11	1087.16	123.241	38.03	23.45	688	#N/A	49.24	19.14	23.13
2020-11-12	1088.44	123.33	40.17	25.35	746	44.17	50.9	18.98	23.3
2020-11-13	1088.91	123.376	40.38	23.1	664	42.95	48.24	17.74	23.14
2020-11-16	1089.53	123.503	37.77	22.45	665	42.49	46.89	18.31	22.38
2020-11-17	1090.61	123.6	37.34	22.71	679	43.08	45.08	17.54	22.25
2020-11-18	1090.48	123.602	36.72	23.84	655	43.62	46.06	17.67	20.9
2020-11-19	1090.83	123.645	38.59	23.11	636	43.53	46.34	17.96	21.97
2020-11-20	1091.84	123.748	38.71	23.7	610	42.31	43.94	17.72	21.44
2020-11-23	1091.77	123.75	37.33	22.66	638	43.04	42.79	18.98	22.49
2020-11-24	1091.92	123.823	33.73	21.64	638	42.38	42.84	20.09	21.37
2020-11-25	1092.18	123.855	34.46	21.25	668	39.62	43.56	19.75	20.78
2020-11-26	1092.61	123.902	34.54		#N/A	#N/A	#N/A	#N/A	20.23
2020-11-27	1092.57	123.889	33.62	20.84	668	39.64	46.21	19.09	20.08
2020-11-30	1091.86	123.829	34.46	20.57	667	40.84	47.37	19.69	22.91
2020-12-01	1089.99	123.618	31.4	20.77	717	41.53	47.81	19.61	21.3
2020-12-02	1090.03	123.646	31.49	21.17	742	43.92	45.68	19.42	21.69
2020-12-03	1091.6	123.83	30.88	21.28	762	42.53	40.95	19.61	21.32
2020-12-04	1091.67	123.867	32.14	20.79	768	43.89	38.34	18.95	20.82
2020-12-07	1093.43	124.078	35.24	21.3	801	49.67	37.68	19.79	21.44
2020-12-08	1094.71	124.225	36.68	20.68	747	49.1	37.7	19.86	20.54
2020-12-09	1094.53	124.221	33.93	22.27	763	48.48	39.52	20.26	20.02
2020-12-10	1094.01	124.17	37.31	22.52	732	47.15	39.7	19.66	20.66
2020-12-11	1095.41	124.324	41.65	23.31	762	47.52	39.51	19.24	23.61
2020-12-14	1094.61	124.245	38.35	24.72	774	49.22	39.96	19.43	22.52
2020-12-15	1093.93	124.18	37.32	22.89	772	48.14	39.34	19.75	21.73
2020-12-16	1092.04	123.963	35.08	22.5	728	46.96	38.68	19.39	21.14
2020-12-17	1092.25	124.028	33.89	21.93	730	44.15	36.86	20.1	20.51
2020-12-18	1092.39	124.042	37.3	21.57	677	44.64	37.15	19.58	21.63
2020-12-21	1092.29	124.03	50.02	25.16	763	46.66	41.56	19.8	27.26
2020-12-22	1092.42	124.036	48.45	24.23	738	43.57	42.06	19.5	25.21
2020-12-23	1090.12	123.78	44.12	23.31	735	42.74	39.89	18.87	23.15
2020-12-24	1089.97	123.785	39.93	21.53	690	42.11	39.41	18.99	#N/A
2020-12-25	1089.97	123.785	39.93		#N/A	#N/A	#N/A	#N/A	#N/A
2020-12-28	1090.71	123.785	39.93	21.7	697	45.26	39.67	20.2	21.71
2020-12-29	1092.33	124.046	37.86	23.08	725	46.1	38.64	19.53	22.38
2020-12-30	1091.74	124.012	37.76	22.77	757	47.19	38.01	20.06	23.37
2020-12-31	1091.63	124.017	38.48	22.75	729	48.98	37.83	20.79	#N/A
2021-01-01	1090.97	124.017	38.48		#N/A	#N/A	#N/A	#N/A	#N/A
2021-01-04	1093.04	124.228	36.52	26.97	743	49.59	42.12	21.86	24.84
2021-01-05	1092.8	124.207	38.89	25.34	735	48.95	40.39	22.14	25.2
2021-01-06	1091.99	124.129	37.25	25.07	699	44.64	39.31	21.7	21.44
2021-01-07	1092.12	124.161	36.16	22.37	700	45.2	36.06	20.66	21.02
2021-01-08	1092.59	124.222	35.2	21.56	691	44.81	36.65	22.16	20.53
2021-01-11	1091.59	124.099	37.68	24.08	693	47.77	35.31	20.65	21.98
2021-01-12	1089.69	123.86	38.44	23.33	677	50.12	33.85	20.01	21.95
2021-01-13	1091.63	124.06	34.95	22.21	684	45.6	36.79	18.8	21.09
2021-01-14	1093.19	124.21	34.78	23.25	638	46.23	37.95	19.21	19.69
2021-01-15	1092.25	124.118	36.67	24.34	652	45.14	40.39	19.04	22.43
2021-01-18	1091.47	124.002	37.71		#N/A	#N/A	#N/A	#N/A	21.95
2021-01-19	1091.62	124.033	35.5	23.24	669	45.23	35.37	18.87	21.75
2021-01-20	1092.11	124.106	32.98	21.58	623	42.53	35.67	18.95	20.28
2021-01-21	1090.51	123.944	33.11	21.32	657	43.01	35.05	18.85	19.94
2021-01-22	1091.51	124.027	32.92	21.91	628	43.09	36.25	18.42	21.32
2021-01-25	1093.17	124.205	34.82	23.19	648	43.08	38.02	18.51	26.01
2021-01-26	1092.15	124.07	33.64	23.02	613	43.14	37.13	17.88	23.1
2021-01-27	1092.59	124.072	36.78	37.21	642	44.16	40.21	18.47	26.77
2021-01-28	1091.62	123.925	38.54	30.21	622	45.53	40.45	19.38	25.93
2021-01-29	1090.6	123.849	38.27	33.09	630	47.41	40.2	20.64	29.01
2021-02-01	1091.08	123.904	37.37	30.24	653	46.28	39.16	21.81	27.33
2021-02-02	1090.57	123.867	34.72	25.56	645	45.91	38.62	19.61	24.02
2021-02-03	1090.66	123.886	33.5	22.91	656	46.93	37.11	18.45	22.72
2021-02-04	1090.22	123.845	30.95	21.77	647	47.25	35.37	19.3	21.37
2021-02-05	1090.38	123.873	30	20.87	619	47.2	34.94	18.7	20.64
2021-02-08	1090.6	123.888	29.72	21.24	618	48.45	34.48	18.45	20.44
2021-02-09	1090.91	123.913	30.68	21.63	622	46.75	33.54	18.35	21.12
2021-02-10	1090.83	123.903	28.67	21.99	622	46.27	33.77	18.57	22.47
2021-02-11	1091.79	123.99	27.7	21.25	622	45.95	34.33	18.31	21.21
2021-02-12	1090.35	123.846	27.59	19.97	622	47.01	34.25	18.08	20.06
2021-02-15	1088.61	123.663	27.2		#N/A	#N/A	#N/A	#N/A	20.15
2021-02-16	1087.55	123.562	28.49	21.46	631	56.78	35.13	19.57	20.93
2021-02-17	1088.2	123.611	29.7	21.5	657	55.97	36.9	20.49	21.83
2021-02-18	1087.02	123.485	29.95	22.49	621	56.12	37.9	19.66	22.52
2021-02-19	1086.17	123.381	28.58	22.05	593	60.43	37.76	19.26	20.48
2021-02-22	1087.27	123.506	30.34	23.45	632	62.42	38.57	19.12	21.69
2021-02-23	1086.18	123.376	32.17	23.11	676	61.73	39.75	18.3	23.13
2021-02-24	1085.51	123.287	31.06	21.34	635	61.92	39.58	18.31	21.43
2021-02-25	1081.95	122.908	33.95	28.89	755	74.16	40.58	21.26	22.1
2021-02-26	1082.3	122.922	38.32	27.95	723	75.66	42.49	21.08	26.86
2021-03-01	1086.21	123.359	33.31	23.35	669	68.73	42.56	21.33	22.16
2021-03-02	1086.86	123.412	31.66	24.1	662	57.7	40.96	20.06	21.81
2021-03-03	1084.95	123.23	32.1	26.67	655	65.83	39.83	20.93	21.7
2021-03-04	1085.91	123.286	32.25	28.57	709	68.13	37.27	21.61	22.09
2021-03-05	1085	123.167	34.92	24.66	679	69.37	36.61	20.21	25.08
2021-03-08	1084.27	123.093	33.68	25.47	722	71.65	38.89	20.64	20.9
2021-03-09	1084.69	123.162	32.29	24.03	691	67.44	37.97	19.54	20.26
2021-03-10	1084.99	123.174	30.09	22.56	689	63.19	37.56	18.55	19.67
2021-03-11	1085.7	123.279	27.96	21.91	649	63.9	37.86	18.21	18.88
2021-03-12	1084.55	123.153	29.03	20.69	663	70.83	37.51	18.36	18.71
2021-03-15	1086.28	123.347	30.03	20.03	668	70.79	39.38	17.86	18.62
2021-03-16	1086.14	123.325	28.81	19.79	683	70.81	39.1	17.93	17.55
2021-03-17	1084.21	123.092	30.41	19.23	653	66.75	37.4	17.24	17.57
2021-03-18	1083.24	122.972	29.17	21.58	657	70.48	48.44	17.79	17.46
2021-03-19	1084.6	123.111	29.42	20.95	633	68.8	44.38	16.57	18.4
2021-03-22	1085.3	123.194	30.39	18.88	630	67.62	40.28	16.47	17.68
2021-03-23	1086.08	123.3	28.86	20.3	621	60.77	48.62	16.69	17.6
2021-03-24	1086.56	123.366	28.59	21.2	638	60.71	64.91	15.7	17.77
2021-03-25	1087.39	123.461	29.62	19.81	650	59.54	49.88	15.58	18.88
2021-03-26	1086.69	123.344	28.6	18.86	611	61.49	44.93	15.48	17.11
2021-03-29	1085.4	123.198	29.15	20.74	634	65.96	44.16	17.23	18.35
2021-03-30	1083.49	123.004	28.83	19.61	640	67.44	41.46	18.3	18.47
2021-03-31	1084.55	123.166	26.52	19.4	640	71.27	45.65	17.07	17.97
2021-04-01	1085.52	123.448	24.5	17.33	572	64.99	40.15	16.74	16.9
2021-04-02	1085.52	123.448	24.5		#N/A	63.71	40.15	#N/A	#N/A
2021-04-05	1085.52	123.448	24.5	17.91	572	61.79	42	17.08	#N/A
2021-04-06	1086.02	123.506	26	18.12	644	60.29	42.41	16.76	17.11
2021-04-07	1085.98	123.532	25.83	17.16	645	62.54	41.27	16.11	16.66
2021-04-08	1086.88	123.61	25.48	16.95	645	60.08	40.7	15.72	16.16
2021-04-09	1084.55	123.427	25.94	16.69	645	61.21	39.19	15.3	16.18
2021-04-12	1084.93	123.444	25.37	16.91	545	63.5	37.04	14.88	17.05
2021-04-13	1085.14	123.409	26.53	16.65	561	61.2	35.2	14.26	16.31
2021-04-14	1083.78	123.283	24.58	16.99	540	60.08	35.7	14.69	16.19
2021-04-15	1085.41	123.46	23.18	16.57	567	59.05	34.2	15.36	15.71
2021-04-16	1084.44	123.361	23.34	16.25	561	62.57	32.79	15.32	16.11
2021-04-19	1083.52	123.267	26.93	17.29	602	63.96	35.07	16.01	17.21
2021-04-20	1084.43	123.341	28.7	18.68	618	64.35	35.68	15.59	21.08
2021-04-21	1084.7	123.379	28.24	17.5	608	62.27	42.44	16.41	19.28
2021-04-22	1084.84	123.386	28.27	18.71	595	59.62	39.39	16.05	17.76
2021-04-23	1084.6	123.363	27.51	17.33	567	59.98	38.7	15.74	18.19
2021-04-26	1084.84	123.371	26.77	17.64	587	60.98	41.23	15.51	18.28
2021-04-27	1084.64	123.356	27.02	17.56	572	60.15	38.44	14.77	19.21
2021-04-28	1083.91	123.283	26.25	17.28	562	60.31	36.42	14.79	18.38
2021-04-29	1082.5	123.115	25.67	17.61	550	59.02	36.37	14.54	18.88
2021-04-30	1083.3	123.188	25.09	18.61	578	58.13	38.39	14.58	20.63
2021-05-03	1083.75	123.224	25.09	18.31	592	57.33	40.15	15.65	19.93
2021-05-04	1085.4	123.406	26.81	19.48	606	58.51	37.15	15.91	22.82
2021-05-05	1085.28	123.377	26	19.15	599	56.93	38.33	15.7	19.9
2021-05-06	1085.41	123.382	27.06	18.39	606	57.75	37.74	16.57	20.38
2021-05-07	1085.15	123.336	25.92	16.69	646	54.13	37.63	16.46	18.38
2021-05-10	1084.82	123.319	25.86	19.66	646	55.48	37.99	17.19	18.5
2021-05-11	1082.47	123.023	27.65	21.84	646	58.01	37.93	17.17	22.56
2021-05-12	1080.79	122.832	29.35	27.59	656	58.47	36.94	17.56	23.94
2021-05-13	1079.97	122.739	29.73	23.13	623	56.59	37.94	17.1	23.35
2021-05-14	1080.25	122.773	31.32	18.81	623	54.99	36.46	16.75	19.55
2021-05-17	1080	122.735	30.84	19.72	595	58.59	36.42	17.62	21.81
2021-05-18	1079.75	122.711	31.17	21.34	635	57.18	37.01	17	21.31
2021-05-19	1079.52	122.661	31.68	22.18	646	57.31	38.82	17.79	24.48
2021-05-20	1078.72	122.585	31.46	20.67	613	55.04	39.43	17.29	22.1
2021-05-21	1079.82	122.699	31.35	20.15	598	54.59	39.34	16.47	20.35
2021-05-24	1080.34	122.76	30.65	18.4	605	54.94	35.54	16.91	19.24
2021-05-25	1081.55	122.918	27.66	18.84	636	53.72	36.23	17.09	19.08
2021-05-26	1083.22	123.094	27.24	17.36	610	52.82	33.89	16.81	18.28
2021-05-27	1081.88	122.949	26.17	16.74	616	53.47	33.63	16.15	17.82
2021-05-28	1082.69	123.023	24.94	16.76	612	52.04	33.54	16.08	17.17
2021-05-31	1082.56	123.024	24.94		#N/A	#N/A	#N/A	#N/A	19.1
2021-06-01	1082.65	123.041	23.83	17.9	613	54.99	33.43	16.09	18.77
2021-06-02	1083.78	123.166	25.63	17.48	601	55.21	32.77	15.65	17.85
2021-06-03	1083.54	123.132	25.82	18.04	631	53.96	33.89	15.95	18.24
2021-06-04	1084.75	123.276	24.92	16.42	631	49.78	31.76	15.83	17.38
2021-06-07	1084.5	123.238	25.77	16.42	579	49.55	31.7	15.57	17.71
2021-06-08	1085.31	123.351	24.9	17.07	577	49.93	31.95	15.59	17.72
2021-06-09	1086.68	123.509	21.71	17.89	559	52.84	31.79	15.43	17.23
2021-06-10	1086.81	123.513	20.79	16.1	559	48.26	33.03	15.5	16.66
2021-06-11	1087.87	123.647	19.59	15.65	559	50.85	32.55	15.21	15.15
2021-06-14	1087.4	123.606	19.49	16.39	526	54.03	33.13	16.13	16.05
2021-06-15	1086.67	123.523	20.32	17.02	526	52.92	31.56	16.26	16.41
2021-06-16	1087.04	123.564	20.23	18.15	553	54.28	33.83	16.3	16.18
2021-06-17	1086.3	123.472	20.46	17.75	537	54.91	36.84	17.66	17.08
2021-06-18	1086.35	123.499	20.41	20.7	576	60.45	33.95	17.9	20.76
2021-06-21	1084.81	123.319	21.48	17.89	585	61.86	35.01	16.91	19.48
2021-06-22	1084.12	123.26	21.61	16.66	561	58.64	34.28	16.66	17.57
2021-06-23	1084.95	123.346	20.28	16.32	565	55.6	34.68	16.2	18.55
2021-06-24	1085.11	123.378	19.76	15.97	551	54.83	32.05	15.7	17.35
2021-06-25	1083.93	123.236	19.63	15.62	536	55.58	31.3	15.29	16.68
2021-06-28	1085.24	123.392	20.34	15.76	563	56.33	31.86	15.36	17.65
2021-06-29	1084.93	123.35	20.83	16.02	565	56.8	31.99	16.19	16.95
2021-06-30	1086.29	123.511	21.31	15.83	602	57.27	32.74	15.97	18.18
2021-07-01	1085.06	123.504	21.62	15.48	600	57.52	32.47	15.8	17.73
2021-07-02	1086.4	123.662	21.24	15.07	600	52.41	32.87	15.28	16.57
2021-07-05	1085.42	123.567	20.49		#N/A	#N/A	#N/A	#N/A	16.75
2021-07-06	1087.89	123.854	21.97	16.44	600	56.55	37.59	15.45	18.13
2021-07-07	1089.29	123.996	22.05	16.2	600	60.65	42.01	15.21	17.32
2021-07-08	1090.06	124.073	25.73	19	600	61.68	38.8	15.82	19.97
2021-07-09	1088.96	123.945	23.66	16.18	600	59.92	37.02	15.27	17.95
2021-07-12	1089.31	124.003	23.07	16.17	529	60.78	38.73	15.04	17.95
2021-07-13	1089.69	124.035	23.13	17.12	534	60.8	35.4	14.84	18
2021-07-14	1090.45	124.118	22.18	16.33	549	57.31	38.2	14.79	17.68
2021-07-15	1090.82	124.173	23.15	17.01	552	56.98	38.04	15.01	18.64
2021-07-16	1091.83	124.264	23.66	18.45	516	58.24	37.15	14.6	19.45
2021-07-19	1093.13	124.42	27.82	22.5	559	67.58	46.36	15.96	25.44
2021-07-20	1094.36	124.537	28.48	19.73	610	69.31	52.26	15.01	24.49
2021-07-21	1093.56	124.469	26.77	17.91	550	65.28	42.91	15.01	21.52
2021-07-22	1094.92	124.588	24.75	17.69	505	64.96	36.44	14.51	19.91
2021-07-23	1094.96	124.591	23.76	17.2	624	65.28	34.05	14.53	17.55
2021-07-26	1095.07	124.617	24.17	17.58	549	69.03	35.59	15.2	18.53
2021-07-27	1096.39	124.743	25.11	19.36	568	70.07	35.14	15.51	21.36
2021-07-28	1097.19	124.824	24.72	18.31	562	62.4	34.62	15.61	19.48
2021-07-29	1097.04	124.834	23.14	17.7	522	62.08	33.36	15.21	19.26
2021-07-30	1097.34	124.895	23.37	18.24	516	61.19	32.85	15.09	20.94
2021-08-02	1098.5	124.974	22.91	19.46	547	64.29	36.23	15.23	19.84
2021-08-03	1098.67	125.02	23.77	18.04	547	65.42	37.55	15.09	20.22
2021-08-04	1098.96	125.042	23.74	17.97	554	62.67	42.27	14.88	19.21
2021-08-05	1099.36	125.127	23.11	17.28	554	63.57	39.09	14.84	18.25
2021-08-06	1097.31	124.886	22.62	16.15	518	62.64	39.31	15.9	17.89
2021-08-09	1097.09	124.87	22.66	16.72	518	65.72	43.28	17.26	17.55
2021-08-10	1097.09	124.878	22.55	16.79	518	66.55	39.28	16.93	17.28
2021-08-11	1096.97	124.855	21.5	16.06	518	60.66	38.32	15.85	17.04
2021-08-12	1096.89	124.847	20.92	15.59	518	57.39	36.5	15.67	16.11
2021-08-13	1096.82	124.854	20.74	15.45	518	55.45	35.91	15.15	15.8
2021-08-16	1097.27	124.889	21.46	16.12	546	59.4	38.84	15.62	18
2021-08-17	1097.15	124.881	22.39	17.91	581	60.28	39.5	16.1	18.39
2021-08-18	1097.6	124.932	22.7	21.57	549	58.05	40.86	15.8	18.47
2021-08-19	1097.69	124.926	25.18	21.67	536	59.38	40.98	15.91	22.13
2021-08-20	1097.87	124.948	24.81	18.56	542	59.95	40.67	15.34	20.15
2021-08-23	1097.26	124.887	22.88	17.15	540	62.23	38.67	15.84	17.89
2021-08-24	1096.79	124.849	22.65	17.22	532	63.03	36.79	15.45	18.09
2021-08-25	1094.7	124.601	22.54	16.79	537	64.51	35.6	15.9	17.83
2021-08-26	1094.11	124.565	23.02	18.84	535	63.41	36.33	16.44	19.09
2021-08-27	1094.19	124.564	22.03	16.39	527	57.98	34.93	15.27	17.6
2021-08-30	1094.96	124.564	22.03	16.19	534	60.14	35.27	15.52	17.5
2021-08-31	1092.84	124.408	21.53	16.48	556	59.54	34.28	15.47	18.77
2021-09-01	1092.41	124.348	20.97	16.11	537	58.09	36.13	15.12	17.47
2021-09-02	1093.26	124.43	20.86	16.41	520	55.8	31.35	14.76	16.97
2021-09-03	1092.25	124.327	22.47	16.41	507	53.26	36.91	14.95	18.19
2021-09-06	1092.4	124.35	22.17		#N/A	#N/A	#N/A	#N/A	17.56
2021-09-07	1090.08	124.106	22.89	18.14	527	57.05	32.91	15.36	18.6
2021-09-08	1090.08	124.114	21.75	17.96	533	57.02	31.91	15.14	20.49
2021-09-09	1091.94	124.297	21.16	18.8	511	52.61	33.87	15.1	19.64
2021-09-10	1090.81	124.192	20.68	20.95	511	51.73	33.54	15.15	20.36
2021-09-13	1090.96	124.199	21.35	19.37	516	53.1	32.74	15.09	20.74
2021-09-14	1091.2	124.249	21.66	19.46	512	51.73	33.63	15.02	20.46
2021-09-15	1090.34	124.171	21.27	18.18	493	53.93	32.38	15.14	21.69
2021-09-16	1090.11	124.138	20.63	18.69	517	53.7	33.16	15.92	21.65
2021-09-17	1089.02	124.023	21.28	20.81	507	56.06	32.32	15.92	23.17
2021-09-20	1090.17	124.154	28.19	25.71	544	59.58	35.23	16.85	26.47
2021-09-21	1090.82	124.204	26.69	24.36	526	59.2	34.45	16.46	25.51
2021-09-22	1090.62	124.182	24.73	20.87	503	55.92	32.43	16.41	22.81
2021-09-23	1087.24	123.864	22.67	18.63	484	56.79	32.3	16.82	20.62
2021-09-24	1086.51	123.757	24	17.75	482	58.46	34.01	16.44	21.85
2021-09-27	1086.35	123.721	24.31	18.76	493	60.5	34.98	16.2	20.83
2021-09-28	1085.28	123.61	26.88	23.25	523	62.71	36.1	16.78	24.89
2021-09-29	1085.94	123.709	26.69	22.56	563	61.21	35.26	17.39	23.96
2021-09-30	1085.56	123.614	27.89	23.14	540	61.07	38.68	17.16	23.24
2021-10-01	1085.81	123.73	28.56	21.15	504	57.38	37.38	16.32	24.04
2021-10-04	1085.57	123.71	29.44	22.96	543	60.61	37.27	16.77	25.19
2021-10-05	1084.3	123.559	29.32	21.3	528	62.83	37.2	16.56	22.23
2021-10-06	1083.74	123.496	34	21	550	60.65	41.02	16.58	24.33
2021-10-07	1084.21	123.534	30.15	19.54	543	60.91	46.15	16.29	21.02
2021-10-08	1082.37	123.354	30.4	18.77	519	59.65	38	15.67	20.28
2021-10-11	1080.53	123.155	33.39	20	575	#N/A	38.51	15.56	20.18
2021-10-12	1078.09	122.913	33.11	19.85	536	62.95	37.1	15.1	20.74
2021-10-13	1079.31	123.039	31.57	18.64	499	60.84	36.05	15.51	19.84
2021-10-14	1081.55	123.303	27.98	16.86	471	59.35	36.98	15.34	16.99
2021-10-15	1081.68	123.301	26.67	16.3	503	62.7	34.05	15.06	16.35
2021-10-18	1078.78	123.071	27.74	16.31	509	70.77	35.02	15.53	17.13
2021-10-19	1077.52	122.912	26.03	15.7	509	68.25	35.14	15.32	16.29
2021-10-20	1078.44	123.021	25.45	15.49	501	65.47	35.16	15.27	15.98
2021-10-21	1076.64	122.833	25.04	15.01	493	69.42	36.55	15.15	16.75
2021-10-22	1076.23	122.826	23.96	15.43	490	72.04	36.87	15.74	16.4
2021-10-25	1078.12	122.996	24.25	15.24	520	68.96	36.07	16.73	16.28
2021-10-26	1078.08	123.007	22.34	15.98	508	66.7	35.5	15.96	16.15
2021-10-27	1079.9	123.189	22.13	16.98	512	70.06	37.63	16.08	16.92
2021-10-28	1078.53	123.045	23.84	16.53	525	71.96	37.23	15.8	17.61
2021-10-29	1074.27	122.671	25.86	16.26	549	75.45	37.92	16.07	17.62
2021-11-01	1075.46	122.735	26.27	16.41	557	78.34	36.74	16.31	17.5
2021-11-02	1079.9	123.212	26.11	16.03	550	71.04	35.56	16.47	16.86
2021-11-03	1080.05	123.193	25.52	15.1	544	71.22	39.44	16.28	16.47
2021-11-04	1083.66	123.591	23.41	15.44	514	64.61	38.56	15.87	15.97
2021-11-05	1085.98	123.861	21.58	16.48	519	66.9	37.84	16.64	16.4
2021-11-08	1085.27	123.755	21.45	17.22	537	70.97	37.71	16.66	17.2
2021-11-09	1086.94	123.927	22.59	17.78	559	73.02	36.33	16.76	18.06
2021-11-10	1084.48	123.687	22.36	18.73	598	78.31	37.09	16.8	17.18
2021-11-11	1083.01	123.519	22.97	17.66	603	#N/A	36.2	16.95	17.09
2021-11-12	1084.36	123.62	22.8	16.29	604	78.61	36.1	16.85	16.14
2021-11-15	1082.47	123.431	22.99	16.49	661	81.59	36.42	17	16.65
2021-11-16	1081.25	123.316	22.83	16.37	723	81.58	34.69	16.67	16.8
2021-11-17	1079.12	123.106	23.58	17.11	698	81.58	33.75	16.69	16.68
2021-11-18	1081	123.297	23.72	17.59	694	74.51	37.68	16.25	17.77
2021-11-19	1084.07	123.632	24.48	17.91	713	73.39	37.13	15.99	19.12
2021-11-22	1082.23	123.43	25.04	19.17	720	79.21	36.61	16.59	18.88
2021-11-23	1079.04	123.092	27.91	19.38	717	80.57	35.1	16.81	20.64
2021-11-24	1077.27	122.891	29.93	18.58	691	83.15	34.79	16.75	20.67
2021-11-25	1077.44	122.905	31.17		#N/A	#N/A	#N/A	#N/A	19.88
2021-11-26	1078.09	122.862	41.32	28.62	750	89.45	65.72	17.99	32.31
2021-11-29	1077.19	122.803	41.92	22.96	708	89.41	63.34	17.55	28.8
2021-11-30	1078.2	122.919	43.29	27.19	751	84.04	75.23	17.99	30.07
2021-12-01	1078.05	123.012	41.24	31.12	724	82.97	78.18	18.39	26.02
2021-12-02	1081.06	123.34	42.51	27.95	710	82.55	57.27	18.45	30.47
2021-12-03	1081.78	123.405	42.29	30.67	700	79.14	64.55	17.92	31.48
2021-12-06	1082.79	123.544	41.4	27.18	701	87.89	56.21	17.44	30.04
2021-12-07	1082.97	123.62	35.01	21.89	671	88.14	48.15	17.02	24.87
2021-12-08	1080.65	123.344	33.94	19.9	662	80.29	45.22	16.48	24.71
2021-12-09	1082.96	123.582	30.72	21.58	657	79.54	47.43	16.7	23.52
2021-12-10	1082.84	123.564	31.13	18.69	676	74.36	46.23	15.35	22.43
2021-12-13	1084.2	123.718	28.12	20.31	588	76.41	45.88	15.97	23.02
2021-12-14	1083.77	123.621	28.93	21.89	661	78.98	54.76	16.41	24.42
2021-12-15	1083.3	123.574	28.42	19.29	585	74.06	56.53	15.54	24.74
2021-12-16	1082.59	123.55	26.19	20.57	570	69.1	49.97	15.22	20.61
2021-12-17	1084.36	123.708	27.77	21.57	559	72.46	48.31	15.07	21.98
2021-12-20	1084.95	123.74	31.37	22.87	566	77.02	60.24	15.77	26.83
2021-12-21	1081.87	123.406	28.81	21.01	554	79.52	52.31	15.42	22.83
2021-12-22	1081.3	123.328	28.34	18.63	544	76.85	46	14.94	21.04
2021-12-23	1078.82	123.11	26.12	17.96	552	77.29	43.71	14.62	19.04
2021-12-24	1078.95	123.114	25.57		#N/A	#N/A	43.71	14.62	#N/A
2021-12-27	1078.66	123.042	25.57	17.68	559	80.12	43.58	15.44	19.66
2021-12-28	1078.27	123.03	25.57	17.54	572	77.52	41.23	15.06	19.07
2021-12-29	1076.56	122.844	26.54	16.95	562	78	40.24	15.13	20.18
2021-12-30	1075.95	122.784	25.27	17.33	555	77.62	40.2	14.77	19.27
2021-12-31	1075.86	122.789	24.94	17.22	529	77.1	42.62	14.61	19.27
2022-01-03	1072.99	122.548	24.94	16.6	579	84.08	37.57	15.34	19.17
2022-01-04	1073.53	122.629	24.46	16.91	564	83.11	39.48	15.33	18.64
2022-01-05	1073.83	122.643	25.38	19.73	545	78.68	44.49	16.21	17.76
2022-01-06	1072.71	122.443	28.81	19.61	570	77.73	36.86	15.87	20.1
2022-01-07	1070.47	122.332	29.32	18.76	533	74.69	37	15.04	20.62
2022-01-10	1070.43	122.275	31.85	19.4	566	78.12	37.65	15.56	22.54
2022-01-11	1070	122.161	30.28	18.41	574	77.85	34.31	15.21	19.79
2022-01-12	1070.26	122.298	27.08	17.62	553	74.55	34.39	15.32	18.3
2022-01-13	1070.84	122.38	27.94	20.31	564	72.57	37.11	15.17	18.46
2022-01-14	1068.68	122.1	30.56	19.19	557	76.59	41.18	14.73	21.4
2022-01-17	1066.95	121.912	31.68		#N/A	#N/A	#N/A	#N/A	20.04
2022-01-18	1066.4	121.845	33.82	22.79	606	84.63	42.28	15.09	21.96
2022-01-19	1066.05	121.809	33.07	23.85	579	80.14	42.75	15.64	22.36
2022-01-20	1067.19	121.952	33.45	25.59	587	80.96	41.15	15.09	20.4
2022-01-21	1069.03	122.115	37.06	28.85	592	81.03	42.57	15.2	24.22
2022-01-24	1069.86	122.209	42.04	29.9	621	83.77	47.84	16.3	32.68
2022-01-25	1068.78	122.059	40.85	31.16	610	84.57	47.63	16.47	31.45
2022-01-26	1068.23	122.012	37.65	31.96	607	85.75	45.67	16.42	28.34
2022-01-27	1066.41	121.828	40.26	30.49	629	85.62	46.9	17.15	28.03
2022-01-28	1064.51	121.598	44.52	27.66	648	85.29	47.74	17.12	29.41
2022-01-31	1060.39	121.206	43.09	24.83	669	85.14	42.35	16.7	27.01
2022-02-01	1060.01	121.078	39.79	21.96	658	85.22	41.31	16.5	24.09
2022-02-02	1058.84	121.069	39.01	22.09	625	84.85	41.86	15.66	22.64
2022-02-03	1053	120.216	44.41	24.35	696	85.74	42.15	16.01	24.33
2022-02-04	1042.5	119.297	53.62	23.22	681	87.68	43.88	15.53	26.3
2022-02-07	1037.69	118.774	55.26	22.86	720	87.44	43.34	16.15	24.24
2022-02-08	1038.19	118.772	49.34	21.44	696	82.72	41.26	15.86	23.16
2022-02-09	1040.95	119.208	44.9	19.96	687	81.76	39.4	15.63	21.41
2022-02-10	1037.6	118.837	48.29	23.91	715	88.52	43.81	15.92	21.84
2022-02-11	1036.25	118.694	50.47	27.36	809	94.03	47.44	17.81	24.66
2022-02-14	1035.79	118.574	52.71	28.33	807	102.28	48.83	18.95	30.05
2022-02-15	1033.93	118.383	47.5	25.7	759	94	48.36	17.7	27.06
2022-02-16	1036.18	118.621	47.01	24.29	745	92.74	49.38	18.07	26.61
2022-02-17	1038.36	118.829	49.33	28.11	757	96.17	53.14	19.79	28.79
2022-02-18	1039.79	118.979	51.59	27.75	758	94.36	52.01	18.54	31.27
2022-02-21	1037.96	118.746	55.75		#N/A	#N/A	#N/A	#N/A	36.22
2022-02-22	1032.18	118.223	53.94	28.81	759	95.54	50.11	17.93	32.98
2022-02-23	1033.4	118.267	53.53	31.02	744	95.15	50.51	17.69	33.46
2022-02-24	1031.06	118.001	62.52	30.32	810	100.75	49.04	18.12	38.13
2022-02-25	1030.64	117.969	49.47	27.59	772	93.34	49.5	18.4	32.12
2022-02-28	1033.52	118.213	56.02	30.15	917	100.4	52.5	20.97	35.29
2022-03-01	1046.13	119.483	65.6	33.32	1180	118.26	61.43	22.7	41.58
2022-03-02	1040.6	119.059	69.3	30.74	1036	110.28	61.53	21.85	38.78
2022-03-03	1041.33	118.913	72.57	30.48	1073	115.18	64.37	22.94	40.45
2022-03-04	1045.24	119.501	83.71	31.98	1300	131.82	77.29	26.29	49.64
2022-03-07	1036.27	118.501	99.96	36.45	1394	140.03	78.91	29.67	48.24
2022-03-08	1030.13	117.832	94.8	35.13	1243	133.37	75.82	31.7	45.56
2022-03-09	1026.3	117.549	79.9	32.45	1124	110.9	73.25	28.01	41.5
2022-03-10	1022.45	117.158	82.89	30.23	1131	105.31	67.34	26.08	43.35
2022-03-11	1021.48	117.04	78.51	30.75	1202	99.03	68.01	24.73	41.37
2022-03-14	1018.03	116.665	77.73	31.77	1186	105.08	65.42	24.08	40.64
2022-03-15	1020.64	116.952	77.76	29.83	1130	101.03	63.62	23.8	41.2
2022-03-16	1018.55	116.779	68.86	26.67	886	100.57	59.35	22.51	36.01
2022-03-17	1019.62	116.889	61.82	25.67	861	91.76	67.78	22.23	32.02
2022-03-18	1021.37	117.125	60.21	23.87	912	91.77	69.09	22	29.9
2022-03-21	1018.88	116.869	61.02	23.53	888	101.94	70.78	21.89	28.34
2022-03-22	1015.56	116.554	58.84	22.94	885	105.38	69.56	20.58	27.48
2022-03-23	1017.49	116.751	59.29	23.57	861	105.72	72.59	23.41	30.77
2022-03-24	1015.57	116.58	59.4	21.67	859	113.14	69.14	24.07	31.16
2022-03-25	1013.88	116.417	56.61	20.81	813	125.27	68.91	24.68	32.23
2022-03-28	1012.78	116.366	55.75	19.63	869	129.28	67.04	23.2	30.5
2022-03-29	1011.83	116.365	46.97	18.9	811	117.92	62.46	21.28	26.58
2022-03-30	1011.13	116.275	47.92	19.33	812	112.98	61.04	21.08	28.1
2022-03-31	1017.2	116.846	47.74	20.56	842	106.88	57.66	20.25	28.99
2022-04-01	1016.09	116.727	46.4	19.63	821	108.34	54.36	19.08	28.5
2022-04-04	1018.44	116.991	44.34	18.57	894	108.37	54.31	19.22	26.73
2022-04-05	1013.84	116.445	52.12	21.03	944	116.37	53.8	18.47	29.16
2022-04-06	1013.11	116.287	57.65	22.1	955	123.92	53.15	18.88	32.24
2022-04-07	1011.2	116.058	57.85	21.55	911	122.67	54.23	18.43	32.53
2022-04-08	1009.54	115.916	57.97	21.16	898	124.86	53.14	18.37	30.73
2022-04-11	1005	115.346	58.81	24.37	882	129.87	54.81	19.25	30.23
2022-04-12	1005.96	115.477	57.82	24.26	867	117.79	55.25	19.37	30.01
2022-04-13	1007.02	115.559	56.85	21.82	840	116.33	51.2	18.7	28.84
2022-04-14	1004.65	115.32	55.18	22.7	898	119.66	53.38	17.71	26.75
2022-04-15	1004.65	115.32	55.18		#N/A	#N/A	#N/A	#N/A	26.75
2022-04-18	1004.65	115.32	55.18	22.17	898	122.32	50.94	19.07	#N/A
2022-04-19	1002.07	114.948	57.62	21.37	854	122.74	50.34	18.19	27.44
2022-04-20	1003.52	115.085	52.96	20.32	833	125.12	52.23	18.15	24.98
2022-04-21	999.225	114.612	50.53	22.68	879	130.69	49.86	18.22	24.54
2022-04-22	995.468	114.19	54.41	28.21	910	128.12	51.15	18.97	28.34
2022-04-25	999.606	114.547	59.36	27.02	895	131.63	52.86	19.47	31.46
2022-04-26	1000.54	114.658	63.48	33.52	947	129.27	53.57	19.23	32.71
2022-04-27	998.236	114.409	63.22	31.6	1032	130.11	53.38	19.16	32.74
2022-04-28	993.531	113.945	62.88	29.99	1156	128.74	51.94	19	31.28
2022-04-29	991.329	113.7	63.44	33.4	1051	128.4	53.1	19.83	30.77
2022-05-02	990.936	113.675	63.44	32.34	1121	135.17	54.15	20.06	34.07
2022-05-03	989.485	113.625	62.58	29.25	1082	126.46	54.04	19.71	31.38
2022-05-04	986.592	113.324	65.52	25.42	976	121.99	53.15	18.81	31.23
2022-05-05	985.182	113.169	66.03	31.2	1101	122.72	54.72	19.36	32.77
2022-05-06	976.885	112.247	72.35	30.19	1082	121.42	54.82	18.71	32.8
2022-05-09	976.759	112.219	75.74	34.75	1119	125.22	57.9	20.49	35.91
2022-05-10	981.551	112.649	72.18	32.99	1026	126.76	56.06	20.02	35.01
2022-05-11	979.765	112.715	66.15	32.56	961	118.05	53.43	20.26	31.12
2022-05-12	986.755	113.296	67.36	31.77	1125	118.73	52.71	21.51	32.4
2022-05-13	983.74	113.127	63.05	28.87	1063	114.61	51.22	21.2	29.11
2022-05-16	985.661	113.223	63.85	27.47	989	117.95	51.89	21.16	28.22
2022-05-17	980.833	112.785	59.29	26.1	957	119.46	50.34	20.05	26.24
2022-05-18	981.276	112.831	62.68	30.96	1006	114.86	51.89	19.69	27.63
2022-05-19	981.518	112.807	69.56	29.35	965	115.05	51.16	20.25	29.47
2022-05-20	982.151	112.893	65.13	29.43	939	111.1	50.72	19.31	28.66
2022-05-23	978.866	112.575	63.47	28.48	929	110.19	48.63	19.63	27.58
2022-05-24	981.588	112.778	64.29	29.45	917	111.15	47.04	19.13	28.61
2022-05-25	981.753	112.765	58.23	28.37	935	105.69	46.76	18.27	27.42
2022-05-26	980.459	112.697	51.78	27.5	912	102.49	46.03	17.81	25.66
2022-05-27	982.172	112.933	49.3	25.72	864	98.48	47.92	17.5	23.85
2022-05-30	979.65	112.697	47.15	26.54	#N/A	#N/A	#N/A	#N/A	23.73
2022-05-31	975.922	112.312	51.19	26.19	858	107.12	49.82	17.19	25.25
2022-06-01	973.995	112.094	52.67	25.69	878	109.38	49.14	16.94	25.44
2022-06-02	971.068	112.094	52.67	24.72	860	99.27	47.8	17.13	23.39
2022-06-03	968.833	112.094	52.67	24.79	839	97.73	46.23	16.51	23.39
2022-06-06	966.576	111.366	52.69	25.07	877	102.26	47.9	16.81	22.97
2022-06-07	968.683	111.549	54.27	24.02	867	102.61	45.88	16.64	23.59
2022-06-08	965.269	111.213	50.68	23.96	870	105.29	44.37	16.04	23.13
2022-06-09	958.861	110.525	54.94	26.09	862	105.29	43.87	16.29	23.97
2022-06-10	952.01	109.73	60.87	27.75	919	114.23	42.92	17.58	27.66
2022-06-13	938.489	108.28	71.42	34.02	1132	139.21	47.56	20.84	31.81
2022-06-14	931.819	107.561	74.89	32.69	1138	144.09	46.63	21.99	31.57
2022-06-15	936.446	108.077	73.26	29.62	1027	135.93	47.04	19.4	30.07
2022-06-16	929.755	107.43	81.99	32.95	1086	138.1	46.27	20.65	32.59
2022-06-17	930.558	107.514	81.12	31.13	1053	133.75	49.19	20.28	30.89
2022-06-20	928.229	107.266	76.62	31.03	#N/A	#N/A	#N/A	#N/A	28.59
2022-06-21	928.334	107.264	73.25	30.19	957	138.91	46.56	18.24	28.11
2022-06-22	933.918	107.831	77.4	28.95	953	129.94	48.99	18.29	28.68
2022-06-23	943.946	108.829	79.92	29.05	944	125.98	48.58	18.65	29.21
2022-06-24	942.945	108.773	75.11	27.23	880	127	46.99	17.92	27.77
2022-06-27	938.571	108.302	73.7	26.95	894	133.22	46.99	17.88	27.02
2022-06-28	933.003	107.768	78.81	28.36	916	135.22	46.59	17.95	26.68
2022-06-29	937.155	108.182	83.27	28.16	968	130.43	48.57	18.08	28.11
2022-06-30	940.946	108.51	87.93	28.71	970	135.5	48.9	19.61	29.78
2022-07-01	948.848	109.418	87.21	26.7	1016	144.17	49.4	20.17	28.76
2022-07-04	943.044	108.778	86.47	27.53	#N/A	#N/A	#N/A	20.17	28.32
2022-07-05	951.651	109.723	91.78	27.54	1151	156.16	52.61	21.33	31.6
2022-07-06	954.725	110.09	88.37	26.73	1184	151.14	54.67	21.91	30.11
2022-07-07	950.726	109.759	82.33	26.08	1146	149.71	52.87	20.5	28.32
2022-07-08	952.064	109.979	78.34	24.64	1116	145.25	52.1	19.41	27.55
2022-07-11	957.619	110.562	79.12	26.17	1268	147.72	53.1	19.72	28.87
2022-07-12	963.104	111.106	79.2	27.29	1252	148.11	54.4	19.78	29.26
2022-07-13	959.623	110.753	79.82	26.82	1270	136.1	51.76	18.36	29.85
2022-07-14	957.31	110.479	84.36	26.4	1370	137.76	53.03	19.6	31.82
2022-07-15	960.683	110.786	80.35	24.23	1284	129.85	51.77	19.27	28.82
2022-07-18	957.541	110.482	80.13	25.3	1292	127.69	49.66	19.42	29.06
2022-07-19	954.816	110.16	75.03	24.5	1258	124.7	48.77	18.63	26.72
2022-07-20	957.652	110.685	71.34	23.88	1248	122.9	47.54	19.26	27.4
2022-07-21	960.128	110.936	70.73	23.11	1204	121.15	51.1	18.71	25.55
2022-07-22	972.121	112.151	67.16	23.03	1183	123.7	47.84	18.3	24.06
2022-07-25	974.746	112.489	68.65	23.36	1159	128.27	47.96	18.3	24.53
2022-07-26	977.718	112.75	77.22	24.69	1166	128.55	47.81	18.06	25.57
2022-07-27	977.631	112.682	77.84	23.24	1092	117.28	48.99	17.39	24.04
2022-07-28	986.078	113.564	72.01	22.33	1102	119.93	47.17	16.84	22.55
2022-07-29	986.065	113.608	66.65	21.33	1061	116.36	46.19	16.49	22.3
2022-08-01	988.833	113.911	68.29	22.84	1050	120.5	49.97	17.52	22.96
2022-08-02	987.585	113.759	72.25	23.93	1068	129.23	52.77	17.34	23.77
2022-08-03	983.055	113.308	68.99	21.95	1076	122.04	50.12	16.76	22.34
2022-08-04	986.897	113.681	68.47	21.44	1028	120.57	55.14	16.95	22.45
2022-08-05	979.769	112.97	69.39	21.15	987	122.58	48.76	16.37	22.85
2022-08-08	982.753	113.234	66.55	21.29	982	124.12	46.4	16.76	22.08
2022-08-09	980.801	113.026	71.09	21.77	973	125.12	46.23	16.69	23.28
2022-08-10	983.51	113.324	62.12	19.74	906	115.26	46.56	16.27	21.79
2022-08-11	980.475	113.041	58.28	20.2	901	111.11	45.37	15.81	21.65
2022-08-12	979.71	112.97	57.05	19.53	903	106.28	44	15.22	21.21
2022-08-15	984.717	113.493	57.22	19.95	1021	113.82	46.63	15.37	21.59
2022-08-16	981.021	113.079	61.1	19.69	1029	116.83	50.25	15.27	21.34
2022-08-17	972.943	112.208	66.17	19.9	1047	117.7	51.55	15.32	22.75
2022-08-18	971.649	112.001	65.44	19.56	1102	120.26	47.41	15.36	22.67
2022-08-19	964.405	111.178	70.47	20.6	1129	123.81	50.34	15.91	24.58
2022-08-22	958.651	110.569	81.15	23.8	1206	135.89	50.64	16.57	27.37
2022-08-23	957.373	110.393	81.62	24.11	1162	133.85	47.35	15.8	26.92
2022-08-24	955.267	110.181	79.61	22.82	1151	133.13	48.33	15.9	25.45
2022-08-25	958.542	110.526	76.61	21.78	1129	126.33	48.78	15.57	24.72
2022-08-26	954.494	110.105	82.22	25.56	1110	122.95	47.08	15.42	26.66
2022-08-29	949.06	110.105	82.22	26.21	1154	130.14	47.73	16.02	28.46
2022-08-30	945.504	109.154	89.23	26.21	1139	127.69	49.74	16.52	28.37
2022-08-31	941.607	108.748	90.69	25.87	1120	124.84	52.11	17.02	27.95
2022-09-01	939.131	108.427	88.44	25.56	1172	126.58	53.9	17.8	29.15
2022-09-02	944.014	108.991	79.04	25.47	1152	120.72	53.9	16.88	25.5
2022-09-05	940.773	108.611	85.13	25.99	#N/A	#N/A	#N/A	#N/A	27.79
2022-09-06	939.78	108.55	83.05	26.91	1183	133.54	50	17.68	27.35
2022-09-07	940.394	108.71	80.12	24.64	1157	133.12	53.32	16.77	27.13
2022-09-08	935.138	108.115	79.3	23.61	1099	124.14	51.29	16.4	25.92
2022-09-09	937.965	108.427	75.06	22.79	1068	121.54	48.84	15.91	24.88
2022-09-12	941.922	108.854	71.47	23.87	1085	123.07	44.15	15.79	24.62
2022-09-13	936.336	108.319	76.57	27.27	1148	128.87	44.81	16.93	26.04
2022-09-14	936.531	108.296	74.82	26.16	1104	125.35	45.62	17.17	26.24
2022-09-15	933.913	108.034	74.34	26.27	1103	124.07	46.63	19.66	25.35
2022-09-16	930.718	107.66	78.86	26.3	1086	124.95	47.44	18.31	26.43
2022-09-19	929.897	107.66	78.86	25.76	1108	133.79	46.75	18.37	26.19
2022-09-20	923.264	106.886	83.37	27.16	1131	134.66	48.23	18.59	27.16
2022-09-21	923.471	106.855	87.18	27.99	1067	130.54	48.65	18.48	27.27
2022-09-22	919.184	106.387	89.01	27.35	1072	131.93	47.1	17.93	28
2022-09-23	914.131	106.092	92.58	29.92	1274	137.28	50.82	19.42	30
2022-09-26	911.575	105.689	97.76	32.26	1409	153.61	56.68	20.26	30.75
2022-09-27	906.945	105.155	100.43	32.6	1421	158.12	55.89	19.26	31.32
2022-09-28	907.25	105.095	99.5	30.18	1424	158.99	55.02	19.27	31.34
2022-09-29	904.457	104.82	102.16	31.84	1454	148.14	54.41	19.78	33.07
2022-09-30	907.83	105.158	98.37	31.62	1424	141.89	55.69	19.52	30.71
2022-10-03	916.093	106.053	96.51	30.1	1380	152.94	56.24	20.29	30.71
2022-10-04	918.883	106.51	87.8	29.07	1312	151.21	59.51	19.55	29.27
2022-10-05	913.649	105.847	91.2	28.55	1353	152.01	54.2	19.69	29.86
2022-10-06	909.653	105.48	90.59	30.52	1390	153.29	53.39	19.67	29.17
2022-10-07	905.384	105.015	96.31	31.36	1377	148.46	53.64	19.66	29.92
2022-10-10	900.72	104.492	100.05	32.45	1413	#N/A	51.42	20.54	31.87
2022-10-11	902.508	104.605	101.06	33.63	1393	155.57	51.92	20.59	32.01
2022-10-12	899.791	104.29	98.23	33.57	1393	160.72	51.52	20.4	31.82
2022-10-13	897.895	104.07	96.29	31.94	1319	155.08	50.52	20.07	30.2
2022-10-14	898.295	104.068	94.1	32.02	1308	152.89	50.3	20.07	29.77
2022-10-17	900.139	104.287	90.21	31.37	1322	150.42	50.27	19.96	29.27
2022-10-18	902.099	104.511	88.33	30.5	1264	145.79	49.12	19.19	28.92
2022-10-19	897.372	104.003	89.36	30.76	1270	147.73	47.78	19.41	28.3
2022-10-20	894.802	103.826	88.84	29.98	1264	155.61	47.98	19.23	27.75
2022-10-21	894.309	103.726	88.53	29.69	1288	156.95	47.19	19.05	27.83
2022-10-24	898.068	104.102	86.24	29.85	1288	154.02	47.78	19.58	28.68
2022-10-25	903.817	104.756	81.11	28.46	1265	147.78	47.3	19.33	27.62
2022-10-26	905.673	105.023	78.38	27.28	1167	140.2	48.58	18.67	26.95
2022-10-27	912.409	105.743	78.48	27.39	1170	142.78	49.02	18.51	25.87
2022-10-28	908.217	105.382	76.45	25.75	1189	144.6	47.81	18.01	24.89
2022-10-31	907.564	105.251	79.16	25.88	1237	147.92	47.41	18.27	24.83
2022-11-01	908.626	105.546	76.27	25.81	1216	148.42	47.04	18.45	24.47
2022-11-02	908.006	105.478	75.7	25.86	1187	141.17	47.75	17.84	24.7
2022-11-03	903.179	104.949	77.41	25.3	1199	136.28	46.47	18.03	23.77
2022-11-04	902.584	104.969	72.25	24.55	1192	128.44	47.5	18.03	22.91
2022-11-07	903.065	104.969	69.3	24.35	1188	128.33	45.11	18.12	22.66
2022-11-08	905.314	105.172	67.72	25.54	1185	126.33	45.04	18.91	22.61
2022-11-09	909.948	105.571	66.75	26.09	1195	124.4	45.38	18.91	23.24
2022-11-10	919.34	106.624	58.43	23.53	1169	111.69	43.48	17.69	21.32
2022-11-11	915.863	106.275	53.75	22.52	1213	#N/A	42.06	17.57	20.78
2022-11-14	917.291	106.408	54.07	23.73	1222	119.99	44.42	17.41	20.94
2022-11-15	920.807	106.74	51.95	24.54	1223	128.62	46.72	17.72	20.86
2022-11-16	925.073	107.115	54.27	24.11	1229	130.83	45.12	17.23	21.17
2022-11-17	924.087	107.001	57.14	23.93	1241	132.18	45.34	16.77	21.82
2022-11-18	926.078	107.219	53.38	23.12	1188	129.33	45.93	16.51	20.88
2022-11-21	927.895	107.371	54.08	22.36	1222	132.13	47.11	16.68	21.17
2022-11-22	929.517	107.493	51.68	21.29	1168	133.53	46.3	16.07	20.22
2022-11-23	931.872	107.737	48.15	20.35	1200	136.2	51.56	15.84	19.51
2022-11-24	936.833	108.234	45.27	20.42	#N/A	#N/A	#N/A	#N/A	19.56
2022-11-25	932.118	107.774	47.36	20.5	1181	129.6	50.16	15.23	19.93
2022-11-28	932.552	107.816	52.73	22.21	1187	131.73	50.53	15.77	21.52
2022-11-29	936.959	108.252	52.54	21.89	1183	131.23	47.91	15.71	21.7
2022-11-30	935.323	108.104	53.2	20.58	1139	127.27	46.15	15.45	21.21
2022-12-01	943.304	108.981	49.32	19.84	1265	119.77	45.61	15.92	20.32
2022-12-02	942.096	108.825	49.91	19.06	1148	118.62	45.76	15.42	19.33
2022-12-05	942.597	108.957	51.59	20.75	1141	126.5	45.41	15.81	19.82
2022-12-06	946.266	109.346	54.2	22.17	1126	129.09	46.36	16.19	20.81
2022-12-07	947.217	109.45	55.28	22.68	1118	131.1	47.91	16.55	22.03
2022-12-08	945.93	109.328	56.15	22.29	1075	129.54	47.17	16.45	21.79
2022-12-09	939.685	108.781	53.37	22.83	1030	132.79	46.93	16.26	21.4
2022-12-12	939.065	108.731	54.96	25	992	141.93	44.99	15.51	22.54
2022-12-13	942.34	109.057	50.86	22.55	894	135.08	43.37	14.71	20.39
2022-12-14	942.364	109.059	49.57	21.14	796	120.26	41.82	14.06	20.34
2022-12-15	933.503	108.152	53.9	22.83	846	111.26	43.7	14.39	20.84
2022-12-16	928.212	107.637	64.71	22.62	818	113.65	42.29	14.14	21.32
2022-12-19	928.062	107.601	67.32	22.42	822	118.32	42.47	14.49	20.6
2022-12-20	923.783	107.148	69.23	21.48	830	119.92	41.79	15.03	20.69
2022-12-21	923.692	107.136	63.09	20.07	816	115	41.18	14.78	19.06
2022-12-22	921.991	106.973	60.78	21.97	844	112.05	41.8	14.88	19.96
2022-12-23	919.582	106.752	58.35	20.87	843	113.17	41.21	14.86	20.04
2022-12-26	919.582	106.752	58.35		#N/A	#N/A	#N/A	#N/A	#N/A
2022-12-27	916.124	106.752	58.35	21.65	897	124.89	43.5	16.3	20.66
2022-12-28	916.505	106.398	58.19	22.14	907	120.07	43.95	15.99	20.51
2022-12-29	918.518	106.582	57.97	21.44	930	120.25	42.6	16.18	19.93
2022-12-30	915.058	106.239	56.49	21.67	947	121.61	41.26	16.25	20.89
2023-01-02	919.941	106.239	56.49		#N/A	#N/A	#N/A	#N/A	20.77
2023-01-03	921.424	106.879	55.2	22.9	967	129.97	44.14	17.26	20.28
2023-01-04	927.263	107.422	51.41	22.01	968	125.78	45.83	17.35	19.45
2023-01-05	925.885	107.215	52.96	22.46	976	119.53	43.93	16.78	19.53
2023-01-06	930.962	107.737	48.77	21.13	956	113.87	42.94	16.44	18.49
2023-01-09	930.825	107.717	46.34	21.97	973	116.67	42.75	16.92	19
2023-01-10	927.707	107.425	48.91	20.58	963	119.52	41.6	16.59	19.25
2023-01-11	932.631	107.925	45.59	21.09	953	115.17	41.19	16.32	19.34
2023-01-12	936.354	108.313	44.42	18.83	917	112.34	39.28	15.95	17.94
2023-01-13	937.55	108.483	44.12	18.35	879	113.55	38.19	16.37	17.34
2023-01-16	938.324	108.55	45.52	19.49	#N/A	#N/A	#N/A	#N/A	18.35
2023-01-17	943.255	109.051	44.35	19.36	915	122.27	40.1	16.49	18.62
2023-01-18	947.084	109.462	42.97	20.34	899	112.61	39.25	16.19	18.12
2023-01-19	943.892	109.15	46.97	20.52	888	114.53	39.02	16.71	20.3
2023-01-20	940.004	108.744	47.12	19.85	859	114.76	37.81	16.4	18.68
2023-01-23	939.514	108.699	44.57	19.81	901	114.69	37.3	16.2	18.16
2023-01-24	941.784	108.912	44.5	19.2	881	112.76	38.26	16.17	18.06
2023-01-25	942.786	109.021	45.57	19.08	881	107.74	38.54	16.12	18.42
2023-01-26	941.17	108.863	43.65	18.73	880	104.28	38.12	15.59	18.17
2023-01-27	940.386	108.799	42.99	18.51	860	100.7	38.6	15.23	17.29
2023-01-30	936.848	108.457	44.97	19.94	913	103.77	40.18	15.59	18.75
2023-01-31	937.884	108.575	45.04	19.4	909	99.54	38.55	15.75	18.57
2023-02-01	937.211	108.582	44.18	17.87	870	97.33	37.99	15.22	18.7
2023-02-02	952.742	110.155	38.73	18.73	866	97.76	38.49	15.14	16.67
2023-02-03	946.917	109.653	37.76	18.33	863	98.99	39.48	15.06	16.76
2023-02-06	942.719	109.266	41.23	19.43	900	105.63	38.92	15.81	18.64
2023-02-07	941.981	109.196	40.92	18.66	933	103.15	37.31	15.62	18.76
2023-02-08	939.372	108.881	40	19.63	884	100.75	37.02	15.46	18.72
2023-02-09	941.579	109.1	38.91	20.71	905	102.45	35.75	15.52	18.17
2023-02-10	937.73	108.682	43.72	20.53	915	109.63	35.89	15.46	20.47
2023-02-13	936.82	108.563	43.95	20.34	959	110.67	37.77	15.58	19.79
2023-02-14	933.969	108.257	42.47	18.91	864	110.59	36.67	14.88	18.9
2023-02-15	932.677	108.095	42.17	18.23	850	108.64	35.7	14.9	17.62
2023-02-16	932.089	108.014	41.93	20.17	827	111.01	35.03	14.92	18.05
2023-02-17	932.943	108.093	45.04	20.02	844	110.11	36.04	14.69	19.23
2023-02-20	932.63	108.063	44.89	21.23	#N/A	#N/A	#N/A	#N/A	19.53
2023-02-21	928.359	107.599	48.51	22.87	851	119.62	37.05	15.48	20.89
2023-02-22	929.448	107.645	48.05	22.29	849	118.21	38.36	15.05	21.18
2023-02-23	930.878	107.81	46.34	21.14	848	117.45	36.69	14.84	20.24
2023-02-24	927.213	107.432	47.16	21.67	849	122.84	37.25	14.56	21.67
2023-02-27	926.091	107.278	45.74	20.95	845	120.03	37.55	14.35	19.96
2023-02-28	922.973	106.944	45.99	20.7	824	123.6	35.42	14.17	19.5
2023-03-01	919.133	106.556	45.96	20.58	851	121.08	36.63	14.16	20.11
2023-03-02	918.322	106.47	46.86	19.59	850	124.12	35.61	13.94	19.67
2023-03-03	917.95	106.434	43.49	18.49	835	122.52	35.2	13.93	18.12
2023-03-06	917.909	106.445	41.07	18.61	837	128.19	33.03	14.24	17.87
2023-03-07	918.888	106.531	41.37	19.59	861	133.33	33.76	14.2	18.43
2023-03-08	920.123	106.681	39.86	19.11	868	129.76	33.39	13.79	18.06
2023-03-09	920.74	106.71	40.73	22.61	902	129.28	34.86	14.3	18.02
2023-03-10	927.81	107.386	47.06	24.8	926	140.06	36.76	16.57	21.17
2023-03-13	935.418	107.97	65.28	26.52	933	173.59	38.13	20	25.86
2023-03-14	923.549	106.839	68.68	23.73	856	169.65	47.41	17.95	22.76
2023-03-15	936.357	107.941	83.94	26.14	979	198.71	49.78	19.75	32.02
2023-03-16	930.524	107.229	99.33	22.99	937	167.96	48.65	17.38	26.65
2023-03-17	935.733	107.759	101.36	25.51	949	180.11	51.48	22.83	30.04
2023-03-20	932.894	107.486	87	24.15	959	182.64	51.14	21.4	28.43
2023-03-21	929.75	107.553	69.93	21.38	912	162.31	48.12	19.14	24.11
2023-03-22	928.615	107.546	65.87	22.26	949	142.84	46.97	19.22	22.25
2023-03-23	935.814	108.2	69.16	22.61	930	151.4	46.9	20.95	21.57
2023-03-24	937.428	108.244	78.35	21.74	962	173.66	48.36	19.96	24.88
2023-03-27	933.833	107.885	72.62	20.6	941	161.67	45.41	19.18	23.06
2023-03-28	929.89	107.528	71.81	19.97	931	155.96	44.31	19.03	22.09
2023-03-29	929.618	107.554	64.89	19.12	892	150.58	43.33	17.77	20.4
2023-03-30	927.751	107.535	60.93	19.02	955	141.24	42.02	18.39	19.78
2023-03-31	931.106	107.947	57.01	18.7	910	135.93	40.34	17.31	19.42
2023-04-03	935.452	108.439	56.95	18.55	858	138.17	39.49	18.25	19.09
2023-04-04	936.119	108.481	56.51	19	865	147.75	39.42	19.73	19.02
2023-04-05	940.137	108.86	58.73	19.08	877	153.9	39.14	18.98	19.93
2023-04-06	940.484	108.812	57.44	18.4	871	147.73	34.76	18.44	19.12
2023-04-07	940.484	108.812	57.44		#N/A	139.2	#N/A	#N/A	19.12
2023-04-10	940.484	108.812	57.44	18.97	871	143	34.31	18.54	#N/A
2023-04-11	935.202	108.244	53.02	19.1	837	139.78	34.23	18.33	18.82
2023-04-12	932.807	108.002	50.45	19.09	809	129.68	33.74	17.69	18.63
2023-04-13	933.653	108.112	49.09	17.8	798	119.95	32.78	18.48	17.64
2023-04-14	931.671	107.939	46.86	17.07	771	118.84	32.51	17.16	16.44
2023-04-17	930.726	107.883	47.2	16.95	775	122.69	32.93	17.37	17.46
2023-04-18	932.612	108.139	45.63	16.83	776	122.78	33.69	17.14	16.9
2023-04-19	930.308	107.88	46.72	16.46	797	124.02	34.44	17.21	16.93
2023-04-20	932.687	108.091	49.38	17.17	833	120.61	36.41	17.21	17.73
2023-04-21	931.647	107.944	48.74	16.77	791	120.84	35.17	16.42	17.08
2023-04-24	931.746	107.96	48.05	16.89	780	126.28	34.28	16.88	17.16
2023-04-25	936.272	108.457	49.81	18.76	815	137.13	36.64	17.72	17.93
2023-04-26	936.028	108.329	51.67	18.84	866	130.39	39.25	17.74	18.78
2023-04-27	933.526	108.056	48.89	17.03	838	122.43	37.76	17.28	18.18
2023-04-28	939.742	108.726	47.2	15.78	804	122.46	35.63	16.47	17.43
2023-05-01	938.128	108.731	47.2	16.08	838	128.18	35.94	16.63	#N/A
2023-05-02	940.867	109.015	51.37	17.78	852	137.55	39.48	18.69	20.57
2023-05-03	940.331	108.913	52.76	18.34	854	134.5	43.23	18.7	19.94
2023-05-04	943.844	109.193	56.41	20.09	853	140.71	43.75	20.35	20.83
2023-05-05	939.849	108.827	53.06	17.19	800	130.21	37.35	18.5	18.28
2023-05-08	938.794	108.688	53.06	16.98	800	135.07	35.54	18.67	18.07
2023-05-09	937.823	108.622	53.93	17.71	798	133.93	35.13	18.73	18.92
2023-05-10	939.908	108.835	50.73	16.94	798	125.6	34.13	18.37	18.67
2023-05-11	942.564	109.098	49.14	16.93	798	128.21	35.74	17.77	18.56
2023-05-12	940.575	108.941	46.82	17.03	798	120.52	37.32	17.37	17.01
2023-05-15	938.555	108.775	47.95	17.12	777	127.89	35.16	17.52	17.17
2023-05-16	934.968	108.449	48.21	17.99	718	130.3	35.98	17.62	16.88
2023-05-17	933.62	108.277	47.66	16.87	747	120.78	36.44	16.99	16.95
2023-05-18	929.289	107.925	44.07	16.05	732	122.5	36.02	16.95	15.66
2023-05-19	930.906	108.101	41.88	16.81	732	127.51	35.85	17.22	15.72
2023-05-22	930.009	108.02	42.21	17.21	754	132.29	35.52	17.55	16.31
2023-05-23	929.992	108.024	42.65	18.53	791	131.7	35.11	17.66	17.67
2023-05-24	930.116	108.012	47.17	20.03	779	132.29	35.86	17.56	20.93
2023-05-25	928.615	107.848	45.49	19.14	774	139.54	36.74	16.84	19.86
2023-05-26	925.968	107.641	43.06	17.95	753	145.37	35.95	16.3	17.6
2023-05-29	931.016	108.056	43.06	17.46	#N/A	#N/A	#N/A	#N/A	17.87
2023-05-30	935.586	108.562	43.2	17.46	754	141.36	39.68	15.88	17.96
2023-05-31	938.863	108.899	45.96	17.94	767	136.02	40.68	15.63	19.98
2023-06-01	940.12	108.98	42.39	15.65	720	124.63	40.5	15.5	17.55
2023-06-02	937.598	108.736	39.01	14.6	691	120.95	39.6	14.32	16.03
2023-06-05	934.857	108.472	39.93	14.73	706	119.08	37.45	14.27	16.12
2023-06-06	935.608	108.532	38.71	13.96	706	114.42	36.07	13.94	15.4
2023-06-07	933.086	108.312	37.93	13.94	686	120.5	34.13	13.81	15.33
2023-06-08	934.815	108.479	37.87	13.65	702	115.11	35.18	13.94	15.1
2023-06-09	936.883	108.683	37.64	13.83	702	115.77	33.7	13.69	14.99
2023-06-12	937.566	108.79	37.42	15.01	672	119.8	36.35	13.7	15.18
2023-06-13	935.496	108.579	37.73	14.61	643	118.8	32.38	13.45	14.78
2023-06-14	934.64	108.484	35.3	13.88	607	114.37	33.66	12.84	14.23
2023-06-15	930.908	108.104	36.44	14.5	696	107.34	33.07	13	13.72
2023-06-16	933.707	108.315	33.65	13.54	597	104.43	32.99	12.4	13.07
2023-06-19	931.56	108.125	34.37	14.19	#N/A	#N/A	#N/A	#N/A	14.22
2023-06-20	936.542	108.588	35.14	13.88	627	114.19	34.75	12.73	14.65
2023-06-21	935.062	108.423	35.06	13.2	613	110.84	33.26	12.98	14.4
2023-06-22	931.278	108.058	35.64	12.91	600	107.7	34.93	12.96	14.86
2023-06-23	937.615	108.653	36.51	13.44	602	105.74	35.36	12.73	15.35
2023-06-26	939.36	108.816	38.61	14.25	664	109.02	36.67	13.08	15.88
2023-06-27	935.748	108.48	37.36	13.74	659	110.85	39.3	12.88	15.2
2023-06-28	937.914	108.693	35.73	13.43	672	108.3	36.86	12.53	14.21
2023-06-29	933.878	108.341	34.89	13.54	666	113.45	35.42	12.21	14.25
2023-06-30	934.046	108.403	31.71	13.59	664	110.64	33.28	12.04	13.61
2023-07-03	932.946	108.334	32.02	13.57	674	110.77	33.88	12.22	13.65
2023-07-04	933.611	108.44	32.23	13.7	#N/A	#N/A	#N/A	#N/A	14.1
2023-07-05	933.716	108.472	33.79	14.18	770	110.53	33.91	12.46	15.29
2023-07-06	926.81	107.826	39.23	15.44	697	134.63	35.13	12.25	19.23
2023-07-07	928.145	107.921	37.88	14.83	658	130.41	34.55	12.12	17.54
2023-07-10	928.351	107.903	36.28	15.07	667	131.73	38.35	12.41	17.5
2023-07-11	928.418	107.919	33.25	14.84	667	127.07	32.43	12.64	16.57
2023-07-12	933.467	108.496	30.1	13.54	676	114.07	32.69	13.12	15.18
2023-07-13	938.411	108.95	31.45	13.61	676	111.75	30.04	12.73	15.05
2023-07-14	938.128	108.907	32.9	13.34	676	112.48	30	12.05	14.8
2023-07-17	939.05	108.956	34.84	13.48	703	113.5	31.34	12.34	15.83
2023-07-18	944.644	109.502	32.66	13.3	709	112.45	30.66	12.62	15.51
2023-07-19	943.384	109.406	32.81	13.76	693	107.19	31.06	12.89	15.97
2023-07-20	940.278	109.104	35.1	13.99	719	112.85	30.15	12.67	15.69
2023-07-21	941.976	109.259	33.06	13.6	693	106.66	29.65	12.23	14.94
2023-07-24	944.314	109.481	34.03	13.91	738	109.95	30.11	12.35	15.53
2023-07-25	943.728	109.416	34.02	13.86	729	113.02	30.63	12.42	15.48
2023-07-26	941.232	109.166	33.86	13.19	710	104.88	29.97	12.11	16.1
2023-07-27	942.978	109.331	31.23	14.41	733	111.15	29.12	12.29	14.97
2023-07-28	943.952	109.437	30.14	13.33	712	109.76	29.41	11.78	15.22
2023-07-31	944.939	109.544	32.52	13.63	732	112.03	28.48	12.16	16.23
2023-08-01	941.373	109.325	34.9	13.93	710	116.38	28.35	11.83	17.19
2023-08-02	942.822	109.454	39.01	16.09	727	115.15	28.74	12.45	19.71
2023-08-03	941.124	109.296	40.74	15.92	739	124.6	28.54	12.79	19.65
2023-08-04	941.198	109.305	37.85	17.1	691	115.91	28.06	12.22	18.35
2023-08-07	941.281	109.337	39.33	15.77	709	120.94	27.73	12.24	18.62
2023-08-08	945.993	109.768	42.19	15.99	687	118.74	27.14	12.21	19.54
2023-08-09	944.479	109.634	38.81	15.96	687	112.55	28.56	12.33	18.98
2023-08-10	942.75	109.473	35.96	15.85	687	108.64	27.27	11.84	18.08
2023-08-11	938.813	109.1	37.24	14.84	687	112.13	28.04	11.54	18.37
2023-08-14	938.409	109.016	37.68	14.82	718	119.94	27.55	11.97	18.05
2023-08-15	936.103	108.809	39.4	16.46	705	121.8	28.3	12.11	18.86
2023-08-16	937.521	108.916	41.18	16.78	708	117.24	28.54	12.43	18.55
2023-08-17	935.233	108.707	43.77	17.89	721	121.14	29.3	12.89	20.35
2023-08-18	937.831	108.955	46.83	17.3	730	120.51	28.43	12.63	20.25
2023-08-21	934.265	108.608	46.61	17.13	717	130.69	28.9	12.91	19.84
2023-08-22	936.158	108.788	45.41	16.97	735	126.65	28.56	12.58	19.13
2023-08-23	942.422	109.391	41.41	15.98	733	118.4	28.47	12.67	18.5
2023-08-24	942.484	109.417	40.75	17.2	768	117.56	28.88	12.53	18.9
2023-08-25	939.972	109.172	40.24	15.68	734	110.37	28.81	12.09	18.47
2023-08-28	939.599	109.081	40.24	15.08	744	110.45	28.66	12.21	17.82
2023-08-29	941.929	109.344	36.34	14.45	707	110.68	27.63	12.5	16.78
2023-08-30	940.924	109.293	35.22	13.88	691	109.84	26.63	12.39	16.56
2023-08-31	944.909	109.717	35.71	13.57	730	107.93	26.56	11.78	16.06
2023-09-01	942.673	109.509	34.97	13.09	718	102.92	27.48	11.28	15.94
2023-09-04	940.532	109.325	34.48	13.82	#N/A	#N/A	#N/A	#N/A	16.66
2023-09-05	939.659	109.23	35.07	14.01	758	109.64	28.65	11.36	16.35
2023-09-06	936.436	108.945	37.85	14.45	760	111.31	28.33	11.31	16.8
2023-09-07	938.045	109.098	37.38	14.4	760	105.2	27.59	11.11	16.99
2023-09-08	939.773	109.274	36.07	13.84	730	104.34	27.16	10.99	16.19
2023-09-11	938.875	109.225	35.33	13.8	718	107.23	24.37	10.75	16.23
2023-09-12	938.899	109.233	36.46	14.23	719	105.11	24.23	10.82	16.52
2023-09-13	937.764	109.097	33.64	13.48	736	101.86	25.06	10.33	16.5
2023-09-14	941.546	109.452	31.6	12.82	665	97.11	26.56	10.22	14.75
2023-09-15	939.537	109.282	32.2	13.79	692	96.61	27.16	10.34	14.73
2023-09-18	937.653	109.098	32.87	14	675	99.32	27.91	11.1	16.15
2023-09-19	936.945	109.037	32.87	14.11	692	101.31	30.32	11.09	16.35
2023-09-20	938.705	109.193	32.79	15.14	680	97.04	30.38	10.96	15.41
2023-09-21	937.642	109.09	36.7	17.54	725	106	31.35	11.11	17.12
2023-09-22	937.576	109.062	37.22	17.2	681	101.11	30.61	10.87	16.96
2023-09-25	936.257	108.956	38.26	16.9	708	117.33	30.96	11.43	19.08
2023-09-26	935.016	108.818	41.43	18.94	725	117.72	31.3	13.63	19.77
2023-09-27	933.438	108.65	43.44	18.22	760	122.09	32.48	13.86	19.51
2023-09-28	926.732	108.032	42.4	17.34	746	115.24	31.62	13.09	18.82
2023-09-29	934.844	108.787	41.14	17.52	730	113.55	32.24	12.94	17.47
2023-10-02	931.834	108.527	44.72	17.61	797	127.59	32	14.13	18.92
2023-10-03	930.105	108.362	50.71	19.78	817	141.67	33.25	15.31	20.2
2023-10-04	928.642	108.153	52.39	18.58	804	128.23	35.35	14.58	20.22
2023-10-05	930.809	108.432	54.19	18.49	779	130.18	36.59	14.7	19.66
2023-10-06	929.454	108.34	50.96	17.45	769	126.64	35.68	14.03	18.65
2023-10-09	934.28	108.803	53.79	17.7	783	#N/A	39.85	15.18	20.24
2023-10-10	934.244	108.834	45.78	17.03	782	136.17	39.54	14.49	18.61
2023-10-11	935.793	108.998	45.32	16.09	753	127.18	38.94	14.38	17.77
2023-10-12	934.105	108.838	43.62	16.69	753	126.37	38.52	13.98	17.16
2023-10-13	935.63	108.963	48.28	19.32	780	128.33	44.24	18.91	20.18
2023-10-16	934.284	108.81	47.89	17.21	752	130.16	40.7	16.22	19.92
2023-10-17	930.487	108.399	48.76	17.88	747	130.17	41.37	16.59	19.87
2023-10-18	928.217	108.231	51.18	19.22	796	129.17	44.4	17.38	21.64
2023-10-19	927.477	108.114	52.75	21.4	780	134.62	45.7	19.4	22.3
2023-10-20	930.39	108.379	56.28	21.71	808	135.45	43.79	18.56	23.33
2023-10-23	930.195	108.386	53.68	20.37	778	131.83	41.74	17.28	21.94
2023-10-24	933.235	108.712	49.8	18.97	761	128.13	41.08	16.05	20.99
2023-10-25	931.867	108.598	51.48	20.19	757	131.21	44.91	16.76	20.58
2023-10-26	933.651	108.764	54.53	20.68	722	130.94	43.93	16.53	21.5
2023-10-27	935.187	108.916	53.44	21.27	716	129.16	46.64	17.69	20.79
2023-10-30	936.572	109.083	51.73	19.75	735	131.9	44.01	16.84	20.95
2023-10-31	938.375	109.254	48.5	18.14	725	126.86	41.99	16.23	19.71
2023-11-01	940.149	109.519	45.46	16.87	670	120.55	40.52	15.36	18.65
2023-11-02	943.285	109.847	39.78	15.66	715	118.64	39.79	14.76	17.73
2023-11-03	946.181	110.101	37.58	14.91	697	118.74	38.53	14.04	16.84
2023-11-06	943.399	109.814	37.85	14.89	697	121.74	36.31	13.25	16.83
2023-11-07	945.268	109.976	37.74	14.81	697	120.09	38.72	13.33	16.68
2023-11-08	946.712	110.09	32.95	14.45	697	117.1	40.44	14.07	16.05
2023-11-09	946.682	110.116	32.33	15.29	680	117.05	41.23	14.06	15.77
2023-11-10	944.273	109.882	32.79	14.17	680	116.79	39.29	13.96	16.04
2023-11-13	944.209	109.912	30.46	14.76	685	124.47	39.4	13.92	15.87
2023-11-14	950.695	110.618	27.37	14.16	710	124.11	38.29	13.73	15.03
2023-11-15	950.933	110.63	28.41	14.18	665	122.19	39.51	12.98	14.81
2023-11-16	953.245	110.865	29.71	14.32	656	116.08	42.53	13.04	14.68
2023-11-17	952.24	110.769	28.41	13.8	667	113.11	40.43	12.97	13.85
2023-11-20	950.656	110.603	27.27	13.41	664	115.09	39	12.59	14.01
2023-11-21	953.148	110.83	27.77	13.35	693	112.79	38.52	14.09	14.06
2023-11-22	952.78	110.791	27.42	12.85	690	111.57	42.76	13.35	13.48
2023-11-23	950.5	110.597	27.42	12.8	#N/A	#N/A	#N/A	#N/A	13.64
2023-11-24	949.414	110.516	27.7	12.46	670	107.43	43.38	13.05	13.4
2023-11-27	954.59	110.992	29.97	12.69	661	109.31	43.9	13.31	14.03
2023-11-28	957.736	111.294	30.1	12.69	694	110.06	43.14	15.54	14.17
2023-11-29	962.515	111.799	27.77	12.98	693	114.59	42.9	15.04	14.2
2023-11-30	961.614	111.738	29.91	12.92	708	115.32	39.4	14.22	13.81
2023-12-01	967.541	112.343	29.21	12.63	709	111.51	35.7	16.96	13.5
2023-12-04	968.76	112.523	29.74	13.08	742	118.25	38.08	17.13	14.12
2023-12-05	972.668	112.935	30.67	12.85	758	127.2	36.36	15.46	14
2023-12-06	974.111	113.092	30.92	12.97	809	124.98	39.72	15.4	14.08
2023-12-07	974.684	113.155	30.63	13.06	758	129.74	37.82	14.93	14.21
2023-12-08	971.034	112.774	30.84	12.35	713	121.65	36.24	14.14	13.7
2023-12-11	971.183	112.781	30.41	12.63	767	126.66	35.3	13.99	13.71
2023-12-12	972.483	112.885	28.86	12.07	670	118.62	36.38	12.82	13.2
2023-12-13	975.46	113.193	25.52	12.19	666	113.77	36.6	13.67	13.5
2023-12-14	981.792	113.899	23.78	12.48	685	118.04	33.98	13.96	12.45
2023-12-15	986.599	114.337	26.65	12.28	718	115.75	35.13	13.49	12.12
2023-12-18	984.44	114.138	28.7	12.56	643	118.46	37.09	13.79	12.91
2023-12-19	986.705	114.362	26.51	12.53	621	115.03	35.04	13.75	12.83
2023-12-20	989.066	114.595	26.95	13.67	618	111.87	34.98	13.82	12.74
2023-12-21	990.557	114.728	27.06	13.65	674	111.93	35.44	14.27	13.59
2023-12-22	991.314	114.805	26.17	13.03	649	111.38	33.32	15.25	13.56
2023-12-25	991.314	114.805	26.17		#N/A	#N/A	#N/A	#N/A	#N/A
2023-12-26	991.314	114.805	26.17	12.99	688	116	34.53	15.83	#N/A
2023-12-27	993.818	115.075	26.86	12.43	694	114.53	35.41	16.96	13.43
2023-12-28	993.34	115.054	26.87	12.47	716	113.78	36.45	16.05	13.52
2023-12-29	990.137	114.728	26.06	12.45	733	114.62	36.22	15.85	13.57
2024-01-01	990.137	114.728	26.06		#N/A	#N/A	#N/A	#N/A	#N/A
2024-01-02	988.473	114.546	31.26	13.2	763	127.02	39.05	15.73	14.49
2024-01-03	987.534	114.354	36.58	14.04	731	124.57	38.22	14.85	15.49
2024-01-04	983.051	113.927	34.63	14.13	709	121.12	37.58	14.2	14.31
2024-01-05	981.973	113.771	33.81	13.35	682	116.19	36.07	13.81	14.12
2024-01-08	981.726	113.793	31.6	13.08	690	117.72	36.79	13.56	14
2024-01-09	979.595	113.605	30.04	12.76	678	114.92	36.09	13.16	13.7
2024-01-10	978.841	113.54	24.14	12.69	687	109.63	36.35	13.26	13.39
2024-01-11	979.798	113.698	25.45	12.44	687	103.45	36.78	12.8	13.92
2024-01-12	983.604	114.081	24.78	12.7	687	106.51	40.64	13.49	13.42
2024-01-15	981.79	113.897	24.78	13.25	#N/A	#N/A	#N/A	#N/A	14.11
2024-01-16	980.68	113.788	27.5	13.84	698	113.44	38.34	13.55	14.15
2024-01-17	976.373	113.333	30.53	14.79	690	105.86	37.06	13.53	15.08
2024-01-18	976.686	113.41	28.89	14.13	690	107.22	35.98	13.09	14.51
2024-01-19	976.933	113.466	26.79	13.3	658	104.97	35.79	12.95	14.17
2024-01-22	979.755	113.763	26.25	13.19	643	106.87	35.71	12.83	13.85
2024-01-23	978.253	113.617	28.44	12.55	680	107.7	34.99	12.73	13.58
2024-01-24	978.702	113.68	26.56	13.14	688	105.78	33.99	12.7	13.46
2024-01-25	982.339	114.104	26.07	13.45	717	105.89	35.1	12.79	13.58
2024-01-26	982.576	114.142	25.2	13.26	702	100.23	34.78	11.91	13.61
2024-01-29	985.131	114.509	26.9	13.6	739	106.34	36.32	13.08	14.06
2024-01-30	984.411	114.324	26.73	13.31	745	104.26	36.19	13.05	14.11
2024-01-31	990.293	114.86	29.57	14.35	726	107.28	37.25	13.16	14.82
2024-02-01	989.847	114.888	31.37	13.88	730	113.92	35.38	13.72	14.81
2024-02-02	983.776	114.304	28.36	13.85	697	106.72	34.85	12.66	14.04
2024-02-05	980.074	113.923	29.88	13.67	682	108.68	34.43	12.49	14.16
2024-02-06	981.494	114.062	29.51	13.06	687	110.6	33.01	12.31	13.61
2024-02-07	981.743	114.042	30.83	12.83	687	107.86	31.21	11.84	13.64
2024-02-08	979.029	113.766	30.19	12.79	687	108.6	31.64	11.71	13.76
2024-02-09	977.434	113.608	28.64	12.93	687	106.21	32.44	11.2	13.99
2024-02-12	978.719	113.744	27.44	13.93	628	109.78	32.69	11.81	14.36
2024-02-13	976.891	113.572	28.47	15.85	621	113.22	32.37	12.15	15.03
2024-02-14	979.316	113.817	26.7	14.38	627	111.97	32.76	12.02	14.44
2024-02-15	979.952	113.913	25.79	14.01	612	112.09	32.02	11.79	14.32
2024-02-16	977.65	113.679	25.08	14.24	595	109.2	30.84	11.75	13.79
2024-02-19	978.284	113.737	25.08	14.71	#N/A	#N/A	#N/A	#N/A	14.08
2024-02-20	980.34	113.963	27.43	15.42	637	111.02	31.81	11.81	14.2
2024-02-21	977.672	113.7	26.74	15.34	596	114.27	31.05	11.46	14.55
2024-02-22	978.092	113.789	24.43	14.54	605	115.59	30.55	11.19	13.81
2024-02-23	981.435	114.096	24.95	13.75	568	108.31	31.31	11.5	13.7
2024-02-26	979.171	113.876	26.21	13.74	663	110.77	31.71	11.29	13.44
2024-02-27	977.906	113.766	26.86	13.43	624	110.8	31.35	10.95	13.36
2024-02-28	976.782	113.639	27	13.84	663	108.71	31.21	10.93	13.86
2024-02-29	978.326	113.814	26.42	13.4	622	109.1	31.5	11.16	13.78
2024-03-01	979.533	113.924	25.99	13.11	643	106.48	31.08	13.47	13.78
2024-03-04	979.635	113.936	24.86	13.49	650	109.57	30.47	14.61	13.75
2024-03-05	983.285	114.293	25.78	14.46	650	110.33	30.19	14.54	14.69
2024-03-06	982.31	114.195	24.44	14.5	650	105.33	29.57	15.17	14.16
2024-03-07	984.149	114.441	23.61	14.44	689	105.45	29.57	15.09	13.9
2024-03-08	987.513	114.796	23.07	14.74	645	100.88	29.64	15.47	13.72
2024-03-11	986.515	114.686	24.08	15.22	604	106.63	29.11	15.5	14.73
2024-03-12	985.654	114.654	23.4	13.84	552	101.36	29.36	14.1	13.68
2024-03-13	985.305	114.678	21.96	13.75	579	97.03	29.52	14.09	13.14
2024-03-14	983.158	114.463	23.94	14.4	647	98.67	31.51	13.3	13.32
2024-03-15	982.18	114.336	26.39	14.41	540	97.82	29.77	13.54	13.31
2024-03-18	981.956	114.309	26.04	14.33	542	102.87	29.81	13.83	13.44
2024-03-19	983.275	114.422	25.72	13.82	554	99.99	29.22	13.48	13.12
2024-03-20	983.011	114.37	26.53	13.04	498	92.72	28.82	13.62	12.96
2024-03-21	985.493	114.632	23.99	12.92	535	90.82	27.53	13.42	12.18
2024-03-22	988.574	114.95	27.95	13.06	613	91.04	26.92	12.53	12.42
2024-03-25	986.302	114.702	25.99	13.19	536	92.24	27.49	12.09	12.49
2024-03-26	987.274	114.79	25.63	13.24	529	90.63	27.25	12.57	12.45
2024-03-27	990.248	115.107	25.33	12.78	597	86.28	26.6	13.58	12.86
2024-03-28	990.796	115.2	24.21	13.01	556	86.38	26.27	15.44	13.38
2024-03-29	990.796	115.2	24.21		#N/A	#N/A	#N/A	#N/A	13.38
2024-04-01	990.796	115.207	24.21	13.65	609	94.2	27.65	16.25	#N/A
2024-04-02	987.946	114.906	26.8	14.61	630	96.57	29.04	17.13	15.18
2024-04-03	988.935	114.969	25.79	14.33	649	97.88	29.08	17.49	14.25
2024-04-04	990.67	115.263	24.98	16.35	622	96.13	32.17	17.29	13.69
2024-04-05	988.856	115.057	26.99	16.03	653	94.31	32.36	16.92	16.12
2024-04-08	987.457	114.931	27.07	15.19	653	99.37	30.57	18.17	15.52
2024-04-09	990.26	115.245	27.75	14.98	653	98.73	28.96	18.3	16.3
2024-04-10	987.037	114.932	28.36	15.8	653	109.59	30.08	18.67	15.91
2024-04-11	984.525	114.704	29	14.91	653	108.86	31.27	18.97	16.7
2024-04-12	990.051	115.233	33.16	17.31	746	112.82	32.19	20.21	18.79
2024-04-15	986.216	114.791	35.59	19.23	712	121.15	35.59	22.25	18.52
2024-04-16	982.089	114.339	40.03	18.4	942	119.59	33.61	20.56	19.63
2024-04-17	983.578	114.504	38.54	18.21	713	113.29	33	19.01	18.47
2024-04-18	982.714	114.422	33.54	18	695	108.66	31.4	18.65	17.52
2024-04-19	981.229	114.287	34.34	18.71	674	111.26	31.86	18.51	18.19
2024-04-22	983.516	114.562	31.9	16.94	655	108.56	29.7	17.76	17.11
2024-04-23	983.766	114.603	27.94	15.69	645	106.85	28.86	17.73	15.79
2024-04-24	980.68	114.277	29.46	15.97	646	110.21	29.04	17.45	15.62
2024-04-25	978.369	114.033	31.33	15.37	672	108.55	28.34	17.32	16.36
2024-04-26	980.866	114.278	28.72	15.03	665	104.4	27.81	16.92	15.26
2024-04-29	983.701	114.569	27.28	14.67	634	105.42	27.84	16.92	15.11
2024-04-30	980.275	114.217	29.18	15.65	711	107.46	27.87	16.54	15.57
2024-05-01	979.093	114.217	30.35	15.39	659	100.64	28.7	16.25	15.57
2024-05-02	981.066	114.403	28.19	14.68	670	100.7	27.65	16.05	15.43
2024-05-03	984.124	114.754	26.04	13.49	670	95.96	28.09	15.83	14.44
2024-05-06	985.647	114.895	26.04	13.49	670	94.5	28.58	16.23	14.3
2024-05-07	988.15	115.158	25.45	13.23	670	98.04	27.83	15.75	14.09
2024-05-08	986.722	115.006	24.75	13	670	95.58	27.91	15.29	13.72
2024-05-09	985.755	114.914	24.2	12.69	670	93.85	27.95	16.27	13.46
2024-05-10	984.661	114.795	23.67	12.55	670	94.23	27.88	16.2	13.6
2024-05-13	985.564	114.905	24.18	13.6	572	105.35	28.04	16.52	13.92
2024-05-14	983.77	114.725	24.45	13.42	510	106.55	28.01	16.61	13.96
2024-05-15	988.893	115.264	22.49	12.45	507	93.78	28.07	16.99	13.09
2024-05-16	988.44	115.205	21.96	12.42	507	91.83	27.08	16.26	12.79
2024-05-17	985.218	114.876	21.14	11.99	631	89.35	28.06	17.4	12.13
2024-05-20	984.626	114.822	21.37	12.15	724	88.13	27.89	17.58	12.44
2024-05-21	986.196	114.99	21.88	11.86	513	85.34	27.38	16.76	12.54
2024-05-22	984.889	114.877	21.99	12.29	565	82.49	27.71	16.45	12.74
2024-05-23	981.317	114.507	22.43	12.77	645	86.15	28.66	16.03	12.52
2024-05-24	982.763	114.616	22.17	11.93	596	83.57	27.56	15.26	12.61
2024-05-27	984.615	114.822	22.17	12.36	#N/A	#N/A	#N/A	#N/A	12.88
2024-05-28	983.428	114.749	23.24	12.92	553	89.67	27.53	15.92	13.31
2024-05-29	979.97	114.399	24.45	14.28	924	93.45	26.77	15.83	14.08
2024-05-30	980.866	114.473	23.68	14.47	635	91.09	29.24	15.74	13.98
2024-05-31	981.389	114.541	23.96	12.92	613	91.14	30.34	15.26	14.14
2024-06-03	984.342	114.88	22.94	13.11	713	93.92	30.84	16	14.06
2024-06-04	986.342	115.087	24.31	13.16	661	100.11	30.59	16.22	14.74
2024-06-05	987.625	115.186	23.17	12.63	659	102.43	29.18	16.5	13.93
2024-06-06	985.608	114.971	22.96	12.58	578	100.99	27.71	16.85	13.34
2024-06-07	982.526	114.624	22.17	12.22	597	91.82	26.42	17.13	13.29
2024-06-10	980.927	114.42	24.73	12.74	663	94.16	25.69	16.66	14.51
2024-06-11	983.37	114.634	28.86	12.85	684	97.27	25.54	16.45	15.76
2024-06-12	987.03	115.053	25.84	12.04	700	91.73	24.8	15.92	14.77
2024-06-13	988.038	115.154	30.18	11.94	700	91.93	24.45	15.71	16.75
2024-06-14	991.713	115.51	40.84	12.66	803	100.16	24.71	16.07	19.87
2024-06-17	988.586	115.154	42.24	12.75	856	99.07	24.17	15.63	19.91
2024-06-18	989.561	115.324	36.84	12.3	951	97.99	23.73	15.64	18.6
2024-06-19	989.487	115.339	36.84	12.48	#N/A	#N/A	#N/A	#N/A	18.52
2024-06-20	988.434	115.242	37.49	13.28	1049	94.14	24.23	16.4	17.75
2024-06-21	989.728	115.398	39.19	13.2	982	94.09	24.74	15.86	17.6
2024-06-24	988.784	115.355	37.16	13.33	937	95.2	25.42	15.49	17.38
2024-06-25	989.474	115.436	38.31	12.84	950	96.97	25.75	14.88	18.04
2024-06-26	987.861	115.308	39.67	12.55	961	97.91	26.24	14.88	18.98
2024-06-27	988.324	115.375	39.78	12.24	832	95.69	26.28	15.01	19.06
2024-06-28	987.262	115.275	43.67	12.44	940	98.59	26.54	14.72	18.3
2024-07-01	984.893	115.062	36.28	12.22	965	106.23	27.29	14.86	15.9
2024-07-02	985.388	115.13	34.35	12.03	1174	107.51	25.82	14.35	15.88
2024-07-03	988.881	115.512	30.34	12.09	997	102.83	24.62	14.89	14.83
2024-07-04	987.683	115.402	30.34	12.26	#N/A	#N/A	#N/A	#N/A	14.62
2024-07-05	990.627	115.702	30.01	12.48	823	98.78	23.78	15.62	14.43
2024-07-08	991.699	115.831	26.48	12.37	1026	97.96	23.81	15.13	13.29
2024-07-09	990.113	115.668	28.18	12.51	957	95.62	24.19	14.64	14.6
2024-07-10	991.666	115.819	23.8	12.85	901	92.97	24.01	14.89	13.87
2024-07-11	995.106	116.219	24.1	12.92	889	89.67	24.01	15.74	13.42
2024-07-12	993.756	116.068	22.83	12.46	1053	86.79	24.12	15.12	13.06
2024-07-15	994.556	116.188	23.78	13.12	650	94.5	23.83	15.98	13.59
2024-07-16	995.81	116.296	25.27	13.19	1138	93.87	24.41	17.15	13.86
2024-07-17	996.023	116.308	25.95	14.48	695	91	25.28	16.7	14.55
2024-07-18	997.277	116.475	28.35	15.93	932	91.97	25.68	16.25	15.73
2024-07-19	995.436	116.277	29.33	16.52	885	94.29	26.83	16.34	16.52
2024-07-22	994.395	116.199	27.48	14.91	978	94.45	26.83	15.74	15.69
2024-07-23	996.615	116.451	28.03	14.72	721	95.04	26.74	15.44	14.8
2024-07-24	997.563	116.564	29.58	18.04	846	94.81	26.85	15.98	16.06
2024-07-25	998.684	116.685	29.7	18.46	883	99.08	26.49	15.54	16.93
2024-07-26	999.13	116.748	28	16.39	743	97.76	29.77	15.2	16.15
2024-07-29	1000.79	116.928	28.48	16.6	638	98.65	30.82	15.64	16.83
2024-07-30	1002.04	117.081	28.45	17.69	816	100.42	31.49	16.3	16.53
2024-07-31	1003.58	117.251	27.35	16.36	931	99.41	33.69	17.88	15.74
2024-08-01	1005.63	117.552	35.83	18.59	1000	101.82	33.42	17.61	18.12
2024-08-02	1007.09	117.658	47.01	23.39	885	112.26	38.83	18.7	24.52
2024-08-05	1002.65	117.192	57	38.57	1688	121.22	43.63	21.95	31.17
2024-08-06	1002.98	117.284	52.53	27.71	1267	119.24	40.42	19.1	25.07
2024-08-07	1001.25	117.147	44.04	27.85	1267	112.69	38.01	18.12	20.75
2024-08-08	1001.9	117.174	42.54	23.79	1267	110.42	34.77	18.45	21.63
2024-08-09	1003.42	117.354	41.9	20.37	1267	108.26	33.37	17.8	20.43
2024-08-12	1003.11	117.299	41.51	20.71	1758	118.26	35.17	20.61	19.29
2024-08-13	1005.67	117.582	41.29	18.12	1045	118.44	33.26	19.18	18.34
2024-08-14	1005.77	117.606	36.12	16.19	1123	106.34	31.51	18.49	16.76
2024-08-15	1002.13	117.234	29.68	15.23	1123	103.74	31.14	18.16	15.31
2024-08-16	1003.17	117.387	27.91	14.8	828	102.81	31	20.09	14.5
2024-08-19	1003.25	117.391	28.64	14.65	742	110.13	32.03	18.77	14.92
2024-08-20	1005.44	117.624	30.57	15.88	780	111.57	32.05	18.47	15.46
2024-08-21	1006.43	117.751	29.3	16.27	691	111.38	32.7	18.63	15.48
2024-08-22	1004.57	117.554	29.24	17.55	637	108.5	31.73	17.89	16.01
2024-08-23	1006.38	117.734	27.84	15.86	708	105.63	30.54	17.49	15.31
2024-08-26	1005.5	117.632	27.84	16.15	761	106.66	30.99	17.9	15.66
2024-08-27	1004.23	117.52	28.33	15.43	735	109.22	31.25	17.69	15.46
2024-08-28	1004.98	117.607	29.39	17.11	717	108.76	32.12	17.18	15.59
2024-08-29	1004.73	117.59	28.65	15.65	849	106.7	31.81	17.22	15.23
2024-08-30	1004.75	117.587	29.27	15	749	107.77	33.36	16.4	15.27
2024-09-02	1002.87	117.374	29.27	15.55	#N/A	#N/A	#N/A	#N/A	15.41
2024-09-03	1005.54	117.652	32.8	20.72	825	114.2	35.36	16.55	17.34
2024-09-04	1008.16	117.919	33.67	21.32	897	119.15	37.95	16.19	19.87
2024-09-05	1008.4	117.961	34.74	19.9	642	114.81	36.61	16.48	20.05
2024-09-06	1011.28	118.257	35.64	22.38	630	107.24	37.58	16.49	22.58
2024-09-09	1011.49	118.315	35.22	19.45	735	104.61	37	16.16	20.23
2024-09-10	1012.36	118.381	37.61	19.08	607	108.36	40.23	16.08	19.54
2024-09-11	1013.29	118.502	38.37	17.69	607	103.79	37.76	15.52	19.6
2024-09-12	1010.55	118.213	32.41	17.07	607	98.03	36.07	16.74	17.53
2024-09-13	1010.91	118.291	29.69	16.56	607	100.6	35.22	16.88	16.05
2024-09-16	1012.79	118.514	30.02	17.14	1153	101.22	34.71	17.03	17.12
2024-09-17	1011.78	118.439	29.24	17.61	880	101.58	35.29	17.49	16.58
2024-09-18	1010.33	118.274	30.02	18.23	633	98.61	36.19	17.13	17.06
2024-09-19	1012.79	118.564	27.89	16.33	633	92.64	33.72	16.76	15.42
2024-09-20	1011.09	118.382	30.55	16.15	628	91	32.22	17.08	16.19
2024-09-23	1014.51	118.727	32.56	15.89	628	93.87	34.39	17.72	16.37
2024-09-24	1016.95	118.996	32.51	15.39	648	93.3	33.76	19.26	16.02
2024-09-25	1014.64	118.734	32.49	15.41	733	91.64	34.4	19.13	16.22
2024-09-26	1015.27	118.816	30.67	15.37	590	90.14	39.76	18.82	16.38
2024-09-27	1016.41	118.969	30.09	16.96	670	92.53	39.62	18.59	15.95
2024-09-30	1017.45	119.075	33.02	16.73	712	94.61	39.86	18.08	18.06
2024-10-01	1021.16	119.471	36.11	19.26	717	104.14	42.87	18.57	21.1
2024-10-02	1018.95	119.244	35.7	18.9	748	102.17	46.52	18.07	19.89
2024-10-03	1018.26	119.187	36.19	20.49	748	101.16	54.5	18.28	21.22
2024-10-04	1014.47	118.852	34.22	19.21	748	100.15	46.37	17.48	20.25
2024-10-07	1013.76	118.736	33.7	22.64	748	124.23	48.32	17.71	20.22
2024-10-08	1013.93	118.756	33.51	21.42	748	123.77	52.35	17.64	20.28
2024-10-09	1013.92	118.74	30.73	20.86	748	122.39	48.8	17.62	19.37
2024-10-10	1014.09	118.775	29.31	20.93	748	116.56	52.36	17.27	19.19
2024-10-11	1014.03	118.763	30	20.46	748	118.47	52.68	17.27	18.47
2024-10-14	1014.37	118.812	30	19.7	801	#N/A	51.62	17.47	17.67
2024-10-15	1017.33	119.15	30.05	20.64	719	127.23	48.64	17.38	18.6
2024-10-16	1019.42	119.372	30.4	19.58	887	121.86	47.84	17.31	19.21
2024-10-17	1019.32	119.407	29.03	19.11	732	122.14	46.88	17.57	18.27
2024-10-18	1021.17	119.644	28.21	18.03	643	123.13	47.22	17.77	17.25
2024-10-21	1017.57	119.234	31.3	18.37	776	128.95	46.82	18.19	18.85
2024-10-22	1016.44	119.12	32.27	18.2	822	129.26	47.69	18.73	18.62
2024-10-23	1017.08	119.183	33.97	19.24	1093	129.05	47.78	18.98	18.99
2024-10-24	1020.31	119.554	33.18	19.08	845	127.48	46.66	18.66	19.17
2024-10-25	1018.45	119.347	32.48	20.33	829	128.4	48.97	18.88	18.92
2024-10-28	1018.9	119.388	31.88	19.8	716	130.92	42.96	18.34	18.66
2024-10-29	1017.1	119.171	32.82	19.34	798	131.87	42.47	18.51	18.99
2024-10-30	1013.99	118.79	33.33	20.35	786	130.8	41.13	18.68	19.93
2024-10-31	1012.83	118.677	35.99	23.16	784	135.18	48.79	19.46	21.73
2024-11-01	1012.3	118.714	35.14	21.88	825	132.58	44.14	19.29	21.09
2024-11-04	1013.2	118.802	36.3	21.98	887	136.25	45.75	19.91	20.96
2024-11-05	1011.73	118.695	35.02	20.49	966	130.43	45.61	19.59	19.85
2024-11-06	1016	119.168	30.62	16.27	966	117.64	44.74	17.63	18.49
2024-11-07	1014.8	119.075	27.26	15.2	966	104.08	42.55	17.37	16.74
2024-11-08	1017.08	119.308	27.12	14.94	966	99.85	38.76	15.91	16.78
2024-11-11	1020.05	119.632	27.12	14.97	563	#N/A	37.74	16.02	16.79
2024-11-12	1019.46	119.592	27.23	14.71	642	108.55	34.32	16.25	17.94
2024-11-13	1017.86	119.418	27.32	14.02	642	102.08	37.12	17.05	17.68
2024-11-14	1019.85	119.629	26.29	14.31	625	99.43	30.9	17.39	17.1
2024-11-15	1019.73	119.597	28.13	16.14	751	102.47	35.07	17.17	17.21
2024-11-18	1018.47	119.455	27.82	15.58	579	102.01	36.89	16.97	17.79
2024-11-19	1019.07	119.508	30.05	16.35	579	105.12	37.28	17.85	19.23
2024-11-20	1017.92	119.416	31.11	17.16	579	106.69	36.74	18.34	20.06
2024-11-21	1019.05	119.487	31.52	16.87	579	101.9	36.91	17.59	18.95
2024-11-22	1021.83	119.758	32.87	15.24	733	99.14	35.74	17.54	17.97
2024-11-25	1023.72	119.956	31.83	14.6	875	99.96	37.44	17.8	17.21
2024-11-26	1023.59	119.904	32.53	14.1	875	99.18	38.74	17	17.73
2024-11-27	1024.92	120.011	31.41	14.1	815	97.74	37	16.54	18.3
2024-11-28	1027.05	120.254	31.41	13.9	#N/A	#N/A	#N/A	#N/A	17.6
2024-11-29	1029.68	120.534	27.68	13.51	815	95.22	34.95	16.37	16.96
2024-12-02	1032.69	120.846	28.77	13.34	835	97.81	34.71	16.33	17.18
2024-12-03	1031.88	120.777	28.68	13.3	831	95.6	34.55	16.21	16.47
2024-12-04	1032.53	120.841	27.12	13.45	831	92.25	33.82	15.92	#N/A
2024-12-05	1031.09	120.705	24.55	13.54	831	91.48	29.45	15.93	15.01
2024-12-06	1032.03	120.815	23.86	12.77	831	83.2	30.98	15.04	14.48
2024-12-09	1033.32	120.947	23.41	14.19	831	85.63	27.7	15.75	14.68
2024-12-10	1033.67	121.004	24.8	14.18	831	90.1	28.61	16.34	15.18
2024-12-11	1033.84	121.028	22.24	13.58	629	82.4	31.99	16.86	14.07
2024-12-12	1031.48	120.797	22.65	13.92	629	82.66	33.64	15.43	13.84
2024-12-13	1028.8	120.499	24.51	13.81	629	85.66	34.92	15.63	13.75
2024-12-16	1029.43	120.552	24.24	14.69	736	90.88	33.41	15.38	14.42
2024-12-17	1029.28	120.537	25.86	15.87	743	90.42	30.71	15.64	14.57
2024-12-18	1028.86	120.47	24.98	27.62	997	87.21	32.6	16.54	14.52
2024-12-19	1025.52	120.103	30.22	24.09	997	90.41	30.5	15.83	18.63
2024-12-20	1026.66	120.224	30.3	18.36	997	91.75	29.27	15.73	16.84
2024-12-23	1025.29	120.073	31.41	16.78	997	95.85	30.16	15.54	17.19
2024-12-24	1025.28	120.073	30.56	14.27	997	96.95	30.35	14.71	#N/A
2024-12-25	1025.28	120.073	30.56		#N/A	#N/A	#N/A	#N/A	#N/A
2024-12-26	1025.28	120.073	30.56	14.73	997	95.2	30.01	15.19	#N/A
2024-12-27	1023.36	119.868	29.92	15.95	997	94.8	30.21	14.67	16.27
2024-12-30	1024.9	120.067	32.6	17.4	801	99.08	30.77	15.02	17
2024-12-31	1024.79	120.067	32.14	17.35	801	98.8	30.02	14.62	#N/A
2025-01-01	1024.79	120.067	32.14		#N/A	#N/A	#N/A	#N/A	#N/A
2025-01-02	1025.18	120.043	29.95	17.93	801	96.67	29.54	15.07	17.2
2025-01-03	1021.99	119.701	30.37	16.13	1016	93.35	29.98	14.49	16.93
2025-01-06	1020.69	119.538	27.26	16.04	761	97.89	29.31	14.76	16.43
2025-01-07	1019.92	119.506	28.01	17.82	807	102.78	31.09	14.68	16.31
2025-01-08	1019.07	119.432	27.82	17.7	807	100.76	31.56	14.82	17.11
2025-01-09	1018.02	119.299	28.62	18.07	#N/A	99.73	#N/A	#N/A	16.97
2025-01-10	1016.01	119.13	29.81	19.54	767	96.57	33.91	15.77	18.21
2025-01-13	1015.11	118.998	32.07	19.19	544	103.51	33.98	15.27	18.88
2025-01-14	1014.04	118.888	30.81	18.71	621	101.99	33.51	15	17.7
2025-01-15	1018.15	119.358	27.76	16.12	556	93.1	32.93	15.23	16.1
2025-01-16	1019.37	119.497	26.09	16.6	475	92.72	33.13	15.4	15.56
2025-01-17	1020.76	119.668	25.01	15.97	693	95.6	33.52	14.98	15.72
2025-01-20	1021.7	119.774	25.01	15.81	#N/A	#N/A	#N/A	#N/A	16.63
2025-01-21	1022.09	119.835	24.07	15.06	717	96.78	35.1	15.5	15.45
2025-01-22	1022.22	119.848	23.52	15.1	716	89.9	34.68	15.24	15
2025-01-23	1021.1	119.734	23.33	15.02	723	88.51	34.18	14.95	14.98
2025-01-24	1019.75	119.587	22.97	14.85	751	86.75	29.98	14.85	14.86

## Sheet: GBI
2025-01-24	1019.75
2025-01-23	1021.1
2025-01-22	1022.22
2025-01-21	1022.09
2025-01-20	1021.7
2025-01-17	1020.76
2025-01-16	1019.37
2025-01-15	1018.15
2025-01-14	1014.04
2025-01-13	1015.11
2025-01-10	1016.01
2025-01-09	1018.02
2025-01-08	1019.07
2025-01-07	1019.92
2025-01-06	1020.69
2025-01-03	1021.99
2025-01-02	1025.18
2025-01-01	1024.79
2024-12-31	1024.79
2024-12-30	1024.9
2024-12-27	1023.36
2024-12-26	1025.28
2024-12-25	1025.28
2024-12-24	1025.28
2024-12-23	1025.29
2024-12-20	1026.66
2024-12-19	1025.52
2024-12-18	1028.86
2024-12-17	1029.28
2024-12-16	1029.43
2024-12-13	1028.8
2024-12-12	1031.48
2024-12-11	1033.84
2024-12-10	1033.67
2024-12-09	1033.32
2024-12-06	1032.03
2024-12-05	1031.09
2024-12-04	1032.53
2024-12-03	1031.88
2024-12-02	1032.69
2024-11-29	1029.68
2024-11-28	1027.05
2024-11-27	1024.92
2024-11-26	1023.59
2024-11-25	1023.72
2024-11-22	1021.83
2024-11-21	1019.05
2024-11-20	1017.92
2024-11-19	1019.07
2024-11-18	1018.47
2024-11-15	1019.73
2024-11-14	1019.85
2024-11-13	1017.86
2024-11-12	1019.46
2024-11-11	1020.05
2024-11-08	1017.08
2024-11-07	1014.8
2024-11-06	1016
2024-11-05	1011.73
2024-11-04	1013.2
2024-11-01	1012.3
2024-10-31	1012.83
2024-10-30	1013.99
2024-10-29	1017.1
2024-10-28	1018.9
2024-10-25	1018.45
2024-10-24	1020.31
2024-10-23	1017.08
2024-10-22	1016.44
2024-10-21	1017.57
2024-10-18	1021.17
2024-10-17	1019.32
2024-10-16	1019.42
2024-10-15	1017.33
2024-10-14	1014.37
2024-10-11	1014.03
2024-10-10	1014.09
2024-10-09	1013.92
2024-10-08	1013.93
2024-10-07	1013.76
2024-10-04	1014.47
2024-10-03	1018.26
2024-10-02	1018.95
2024-10-01	1021.16
2024-09-30	1017.45
2024-09-27	1016.41
2024-09-26	1015.27
2024-09-25	1014.64
2024-09-24	1016.95
2024-09-23	1014.51
2024-09-20	1011.09
2024-09-19	1012.79
2024-09-18	1010.33
2024-09-17	1011.78
2024-09-16	1012.79
2024-09-13	1010.91
2024-09-12	1010.55
2024-09-11	1013.29
2024-09-10	1012.36
2024-09-09	1011.49
2024-09-06	1011.28
2024-09-05	1008.4
2024-09-04	1008.16
2024-09-03	1005.54
2024-09-02	1002.87
2024-08-30	1004.75
2024-08-29	1004.73
2024-08-28	1004.98
2024-08-27	1004.23
2024-08-26	1005.5
2024-08-23	1006.38
2024-08-22	1004.57
2024-08-21	1006.43
2024-08-20	1005.44
2024-08-19	1003.25
2024-08-16	1003.17
2024-08-15	1002.13
2024-08-14	1005.77
2024-08-13	1005.67
2024-08-12	1003.11
2024-08-09	1003.42
2024-08-08	1001.9
2024-08-07	1001.25
2024-08-06	1002.98
2024-08-05	1002.65
2024-08-02	1007.09
2024-08-01	1005.63
2024-07-31	1003.58
2024-07-30	1002.04
2024-07-29	1000.79
2024-07-26	999.13
2024-07-25	998.684
2024-07-24	997.563
2024-07-23	996.615
2024-07-22	994.395
2024-07-19	995.436
2024-07-18	997.277
2024-07-17	996.023
2024-07-16	995.81
2024-07-15	994.556
2024-07-12	993.756
2024-07-11	995.106
2024-07-10	991.666
2024-07-09	990.113
2024-07-08	991.699
2024-07-05	990.627
2024-07-04	987.683
2024-07-03	988.881
2024-07-02	985.388
2024-07-01	984.893
2024-06-28	987.262
2024-06-27	988.324
2024-06-26	987.861
2024-06-25	989.474
2024-06-24	988.784
2024-06-21	989.728
2024-06-20	988.434
2024-06-19	989.487
2024-06-18	989.561
2024-06-17	988.586
2024-06-14	991.713
2024-06-13	988.038
2024-06-12	987.03
2024-06-11	983.37
2024-06-10	980.927
2024-06-07	982.526
2024-06-06	985.608
2024-06-05	987.625
2024-06-04	986.342
2024-06-03	984.342
2024-05-31	981.389
2024-05-30	980.866
2024-05-29	979.97
2024-05-28	983.428
2024-05-27	984.615
2024-05-24	982.763
2024-05-23	981.317
2024-05-22	984.889
2024-05-21	986.196
2024-05-20	984.626
2024-05-17	985.218
2024-05-16	988.44
2024-05-15	988.893
2024-05-14	983.77
2024-05-13	985.564
2024-05-10	984.661
2024-05-09	985.755
2024-05-08	986.722
2024-05-07	988.15
2024-05-06	985.647
2024-05-03	984.124
2024-05-02	981.066
2024-05-01	979.093
2024-04-30	980.275
2024-04-29	983.701
2024-04-26	980.866
2024-04-25	978.369
2024-04-24	980.68
2024-04-23	983.766
2024-04-22	983.516
2024-04-19	981.229
2024-04-18	982.714
2024-04-17	983.578
2024-04-16	982.089
2024-04-15	986.216
2024-04-12	990.051
2024-04-11	984.525
2024-04-10	987.037
2024-04-09	990.26
2024-04-08	987.457
2024-04-05	988.856
2024-04-04	990.67
2024-04-03	988.935
2024-04-02	987.946
2024-04-01	990.796
2024-03-29	990.796
2024-03-28	990.796
2024-03-27	990.248
2024-03-26	987.274
2024-03-25	986.302
2024-03-22	988.574
2024-03-21	985.493
2024-03-20	983.011
2024-03-19	983.275
2024-03-18	981.956
2024-03-15	982.18
2024-03-14	983.158
2024-03-13	985.305
2024-03-12	985.654
2024-03-11	986.515
2024-03-08	987.513
2024-03-07	984.149
2024-03-06	982.31
2024-03-05	983.285
2024-03-04	979.635
2024-03-01	979.533
2024-02-29	978.326
2024-02-28	976.782
2024-02-27	977.906
2024-02-26	979.171
2024-02-23	981.435
2024-02-22	978.092
2024-02-21	977.672
2024-02-20	980.34
2024-02-19	978.284
2024-02-16	977.65
2024-02-15	979.952
2024-02-14	979.316
2024-02-13	976.891
2024-02-12	978.719
2024-02-09	977.434
2024-02-08	979.029
2024-02-07	981.743
2024-02-06	981.494
2024-02-05	980.074
2024-02-02	983.776
2024-02-01	989.847
2024-01-31	990.293
2024-01-30	984.411
2024-01-29	985.131
2024-01-26	982.576
2024-01-25	982.339
2024-01-24	978.702
2024-01-23	978.253
2024-01-22	979.755
2024-01-19	976.933
2024-01-18	976.686
2024-01-17	976.373
2024-01-16	980.68
2024-01-15	981.79
2024-01-12	983.604
2024-01-11	979.798
2024-01-10	978.841
2024-01-09	979.595
2024-01-08	981.726
2024-01-05	981.973
2024-01-04	983.051
2024-01-03	987.534
2024-01-02	988.473
2024-01-01	990.137
2023-12-29	990.137
2023-12-28	993.34
2023-12-27	993.818
2023-12-26	991.314
2023-12-25	991.314
2023-12-22	991.314
2023-12-21	990.557
2023-12-20	989.066
2023-12-19	986.705
2023-12-18	984.44
2023-12-15	986.599
2023-12-14	981.792
2023-12-13	975.46
2023-12-12	972.483
2023-12-11	971.183
2023-12-08	971.034
2023-12-07	974.684
2023-12-06	974.111
2023-12-05	972.668
2023-12-04	968.76
2023-12-01	967.541
2023-11-30	961.614
2023-11-29	962.515
2023-11-28	957.736
2023-11-27	954.59
2023-11-24	949.414
2023-11-23	950.5
2023-11-22	952.78
2023-11-21	953.148
2023-11-20	950.656
2023-11-17	952.24
2023-11-16	953.245
2023-11-15	950.933
2023-11-14	950.695
2023-11-13	944.209
2023-11-10	944.273
2023-11-09	946.682
2023-11-08	946.712
2023-11-07	945.268
2023-11-06	943.399
2023-11-03	946.181
2023-11-02	943.285
2023-11-01	940.149
2023-10-31	938.375
2023-10-30	936.572
2023-10-27	935.187
2023-10-26	933.651
2023-10-25	931.867
2023-10-24	933.235
2023-10-23	930.195
2023-10-20	930.39
2023-10-19	927.477
2023-10-18	928.217
2023-10-17	930.487
2023-10-16	934.284
2023-10-13	935.63
2023-10-12	934.105
2023-10-11	935.793
2023-10-10	934.244
2023-10-09	934.28
2023-10-06	929.454
2023-10-05	930.809
2023-10-04	928.642
2023-10-03	930.105
2023-10-02	931.834
2023-09-29	934.844
2023-09-28	926.732
2023-09-27	933.438
2023-09-26	935.016
2023-09-25	936.257
2023-09-22	937.576
2023-09-21	937.642
2023-09-20	938.705
2023-09-19	936.945
2023-09-18	937.653
2023-09-15	939.537
2023-09-14	941.546
2023-09-13	937.764
2023-09-12	938.899
2023-09-11	938.875
2023-09-08	939.773
2023-09-07	938.045
2023-09-06	936.436
2023-09-05	939.659
2023-09-04	940.532
2023-09-01	942.673
2023-08-31	944.909
2023-08-30	940.924
2023-08-29	941.929
2023-08-28	939.599
2023-08-25	939.972
2023-08-24	942.484
2023-08-23	942.422
2023-08-22	936.158
2023-08-21	934.265
2023-08-18	937.831
2023-08-17	935.233
2023-08-16	937.521
2023-08-15	936.103
2023-08-14	938.409
2023-08-11	938.813
2023-08-10	942.75
2023-08-09	944.479
2023-08-08	945.993
2023-08-07	941.281
2023-08-04	941.198
2023-08-03	941.124
2023-08-02	942.822
2023-08-01	941.373
2023-07-31	944.939
2023-07-28	943.952
2023-07-27	942.978
2023-07-26	941.232
2023-07-25	943.728
2023-07-24	944.314
2023-07-21	941.976
2023-07-20	940.278
2023-07-19	943.384
2023-07-18	944.644
2023-07-17	939.05
2023-07-14	938.128
2023-07-13	938.411
2023-07-12	933.467
2023-07-11	928.418
2023-07-10	928.351
2023-07-07	928.145
2023-07-06	926.81
2023-07-05	933.716
2023-07-04	933.611
2023-07-03	932.946
2023-06-30	934.046
2023-06-29	933.878
2023-06-28	937.914
2023-06-27	935.748
2023-06-26	939.36
2023-06-23	937.615
2023-06-22	931.278
2023-06-21	935.062
2023-06-20	936.542
2023-06-19	931.56
2023-06-16	933.707
2023-06-15	930.908
2023-06-14	934.64
2023-06-13	935.496
2023-06-12	937.566
2023-06-09	936.883
2023-06-08	934.815
2023-06-07	933.086
2023-06-06	935.608
2023-06-05	934.857
2023-06-02	937.598
2023-06-01	940.12
2023-05-31	938.863
2023-05-30	935.586
2023-05-29	931.016
2023-05-26	925.968
2023-05-25	928.615
2023-05-24	930.116
2023-05-23	929.992
2023-05-22	930.009
2023-05-19	930.906
2023-05-18	929.289
2023-05-17	933.62
2023-05-16	934.968
2023-05-15	938.555
2023-05-12	940.575
2023-05-11	942.564
2023-05-10	939.908
2023-05-09	937.823
2023-05-08	938.794
2023-05-05	939.849
2023-05-04	943.844
2023-05-03	940.331
2023-05-02	940.867
2023-05-01	938.128
2023-04-28	939.742
2023-04-27	933.526
2023-04-26	936.028
2023-04-25	936.272
2023-04-24	931.746
2023-04-21	931.647
2023-04-20	932.687
2023-04-19	930.308
2023-04-18	932.612
2023-04-17	930.726
2023-04-14	931.671
2023-04-13	933.653
2023-04-12	932.807
2023-04-11	935.202
2023-04-10	940.484
2023-04-07	940.484
2023-04-06	940.484
2023-04-05	940.137
2023-04-04	936.119
2023-04-03	935.452
2023-03-31	931.106
2023-03-30	927.751
2023-03-29	929.618
2023-03-28	929.89
2023-03-27	933.833
2023-03-24	937.428
2023-03-23	935.814
2023-03-22	928.615
2023-03-21	929.75
2023-03-20	932.894
2023-03-17	935.733
2023-03-16	930.524
2023-03-15	936.357
2023-03-14	923.549
2023-03-13	935.418
2023-03-10	927.81
2023-03-09	920.74
2023-03-08	920.123
2023-03-07	918.888
2023-03-06	917.909
2023-03-03	917.95
2023-03-02	918.322
2023-03-01	919.133
2023-02-28	922.973
2023-02-27	926.091
2023-02-24	927.213
2023-02-23	930.878
2023-02-22	929.448
2023-02-21	928.359
2023-02-20	932.63
2023-02-17	932.943
2023-02-16	932.089
2023-02-15	932.677
2023-02-14	933.969
2023-02-13	936.82
2023-02-10	937.73
2023-02-09	941.579
2023-02-08	939.372
2023-02-07	941.981
2023-02-06	942.719
2023-02-03	946.917
2023-02-02	952.742
2023-02-01	937.211
2023-01-31	937.884
2023-01-30	936.848
2023-01-27	940.386
2023-01-26	941.17
2023-01-25	942.786
2023-01-24	941.784
2023-01-23	939.514
2023-01-20	940.004
2023-01-19	943.892
2023-01-18	947.084
2023-01-17	943.255
2023-01-16	938.324
2023-01-13	937.55
2023-01-12	936.354
2023-01-11	932.631
2023-01-10	927.707
2023-01-09	930.825
2023-01-06	930.962
2023-01-05	925.885
2023-01-04	927.263
2023-01-03	921.424
2023-01-02	919.941
2022-12-30	915.058
2022-12-29	918.518
2022-12-28	916.505
2022-12-27	916.124
2022-12-26	919.582
2022-12-23	919.582
2022-12-22	921.991
2022-12-21	923.692
2022-12-20	923.783
2022-12-19	928.062
2022-12-16	928.212
2022-12-15	933.503
2022-12-14	942.364
2022-12-13	942.34
2022-12-12	939.065
2022-12-09	939.685
2022-12-08	945.93
2022-12-07	947.217
2022-12-06	946.266
2022-12-05	942.597
2022-12-02	942.096
2022-12-01	943.304
2022-11-30	935.323
2022-11-29	936.959
2022-11-28	932.552
2022-11-25	932.118
2022-11-24	936.833
2022-11-23	931.872
2022-11-22	929.517
2022-11-21	927.895
2022-11-18	926.078
2022-11-17	924.087
2022-11-16	925.073
2022-11-15	920.807
2022-11-14	917.291
2022-11-11	915.863
2022-11-10	919.34
2022-11-09	909.948
2022-11-08	905.314
2022-11-07	903.065
2022-11-04	902.584
2022-11-03	903.179
2022-11-02	908.006
2022-11-01	908.626
2022-10-31	907.564
2022-10-28	908.217
2022-10-27	912.409
2022-10-26	905.673
2022-10-25	903.817
2022-10-24	898.068
2022-10-21	894.309
2022-10-20	894.802
2022-10-19	897.372
2022-10-18	902.099
2022-10-17	900.139
2022-10-14	898.295
2022-10-13	897.895
2022-10-12	899.791
2022-10-11	902.508
2022-10-10	900.72
2022-10-07	905.384
2022-10-06	909.653
2022-10-05	913.649
2022-10-04	918.883
2022-10-03	916.093
2022-09-30	907.83
2022-09-29	904.457
2022-09-28	907.25
2022-09-27	906.945
2022-09-26	911.575
2022-09-23	914.131
2022-09-22	919.184
2022-09-21	923.471
2022-09-20	923.264
2022-09-19	929.897
2022-09-16	930.718
2022-09-15	933.913
2022-09-14	936.531
2022-09-13	936.336
2022-09-12	941.922
2022-09-09	937.965
2022-09-08	935.138
2022-09-07	940.394
2022-09-06	939.78
2022-09-05	940.773
2022-09-02	944.014
2022-09-01	939.131
2022-08-31	941.607
2022-08-30	945.504
2022-08-29	949.06
2022-08-26	954.494
2022-08-25	958.542
2022-08-24	955.267
2022-08-23	957.373
2022-08-22	958.651
2022-08-19	964.405
2022-08-18	971.649
2022-08-17	972.943
2022-08-16	981.021
2022-08-15	984.717
2022-08-12	979.71
2022-08-11	980.475
2022-08-10	983.51
2022-08-09	980.801
2022-08-08	982.753
2022-08-05	979.769
2022-08-04	986.897
2022-08-03	983.055
2022-08-02	987.585
2022-08-01	988.833
2022-07-29	986.065
2022-07-28	986.078
2022-07-27	977.631
2022-07-26	977.718
2022-07-25	974.746
2022-07-22	972.121
2022-07-21	960.128
2022-07-20	957.652
2022-07-19	954.816
2022-07-18	957.541
2022-07-15	960.683
2022-07-14	957.31
2022-07-13	959.623
2022-07-12	963.104
2022-07-11	957.619
2022-07-08	952.064
2022-07-07	950.726
2022-07-06	954.725
2022-07-05	951.651
2022-07-04	943.044
2022-07-01	948.848
2022-06-30	940.946
2022-06-29	937.155
2022-06-28	933.003
2022-06-27	938.571
2022-06-24	942.945
2022-06-23	943.946
2022-06-22	933.918
2022-06-21	928.334
2022-06-20	928.229
2022-06-17	930.558
2022-06-16	929.755
2022-06-15	936.446
2022-06-14	931.819
2022-06-13	938.489
2022-06-10	952.01
2022-06-09	958.861
2022-06-08	965.269
2022-06-07	968.683
2022-06-06	966.576
2022-06-03	968.833
2022-06-02	971.068
2022-06-01	973.995
2022-05-31	975.922
2022-05-30	979.65
2022-05-27	982.172
2022-05-26	980.459
2022-05-25	981.753
2022-05-24	981.588
2022-05-23	978.866
2022-05-20	982.151
2022-05-19	981.518
2022-05-18	981.276
2022-05-17	980.833
2022-05-16	985.661
2022-05-13	983.74
2022-05-12	986.755
2022-05-11	979.765
2022-05-10	981.551
2022-05-09	976.759
2022-05-06	976.885
2022-05-05	985.182
2022-05-04	986.592
2022-05-03	989.485
2022-05-02	990.936
2022-04-29	991.329
2022-04-28	993.531
2022-04-27	998.236
2022-04-26	1000.54
2022-04-25	999.606
2022-04-22	995.468
2022-04-21	999.225
2022-04-20	1003.52
2022-04-19	1002.07
2022-04-18	1004.65
2022-04-15	1004.65
2022-04-14	1004.65
2022-04-13	1007.02
2022-04-12	1005.96
2022-04-11	1005
2022-04-08	1009.54
2022-04-07	1011.2
2022-04-06	1013.11
2022-04-05	1013.84
2022-04-04	1018.44
2022-04-01	1016.09
2022-03-31	1017.2
2022-03-30	1011.13
2022-03-29	1011.83
2022-03-28	1012.78
2022-03-25	1013.88
2022-03-24	1015.57
2022-03-23	1017.49
2022-03-22	1015.56
2022-03-21	1018.88
2022-03-18	1021.37
2022-03-17	1019.62
2022-03-16	1018.55
2022-03-15	1020.64
2022-03-14	1018.03
2022-03-11	1021.48
2022-03-10	1022.45
2022-03-09	1026.3
2022-03-08	1030.13
2022-03-07	1036.27
2022-03-04	1045.24
2022-03-03	1041.33
2022-03-02	1040.6
2022-03-01	1046.13
2022-02-28	1033.52
2022-02-25	1030.64
2022-02-24	1031.06
2022-02-23	1033.4
2022-02-22	1032.18
2022-02-21	1037.96
2022-02-18	1039.79
2022-02-17	1038.36
2022-02-16	1036.18
2022-02-15	1033.93
2022-02-14	1035.79
2022-02-11	1036.25
2022-02-10	1037.6
2022-02-09	1040.95
2022-02-08	1038.19
2022-02-07	1037.69
2022-02-04	1042.5
2022-02-03	1053
2022-02-02	1058.84
2022-02-01	1060.01
2022-01-31	1060.39
2022-01-28	1064.51
2022-01-27	1066.41
2022-01-26	1068.23
2022-01-25	1068.78
2022-01-24	1069.86
2022-01-21	1069.03
2022-01-20	1067.19
2022-01-19	1066.05
2022-01-18	1066.4
2022-01-17	1066.95
2022-01-14	1068.68
2022-01-13	1070.84
2022-01-12	1070.26
2022-01-11	1070
2022-01-10	1070.43
2022-01-07	1070.47
2022-01-06	1072.71
2022-01-05	1073.83
2022-01-04	1073.53
2022-01-03	1072.99
2021-12-31	1075.86
2021-12-30	1075.95
2021-12-29	1076.56
2021-12-28	1078.27
2021-12-27	1078.66
2021-12-24	1078.95
2021-12-23	1078.82
2021-12-22	1081.3
2021-12-21	1081.87
2021-12-20	1084.95
2021-12-17	1084.36
2021-12-16	1082.59
2021-12-15	1083.3
2021-12-14	1083.77
2021-12-13	1084.2
2021-12-10	1082.84
2021-12-09	1082.96
2021-12-08	1080.65
2021-12-07	1082.97
2021-12-06	1082.79
2021-12-03	1081.78
2021-12-02	1081.06
2021-12-01	1078.05
2021-11-30	1078.2
2021-11-29	1077.19
2021-11-26	1078.09
2021-11-25	1077.44
2021-11-24	1077.27
2021-11-23	1079.04
2021-11-22	1082.23
2021-11-19	1084.07
2021-11-18	1081
2021-11-17	1079.12
2021-11-16	1081.25
2021-11-15	1082.47
2021-11-12	1084.36
2021-11-11	1083.01
2021-11-10	1084.48
2021-11-09	1086.94
2021-11-08	1085.27
2021-11-05	1085.98
2021-11-04	1083.66
2021-11-03	1080.05
2021-11-02	1079.9
2021-11-01	1075.46
2021-10-29	1074.27
2021-10-28	1078.53
2021-10-27	1079.9
2021-10-26	1078.08
2021-10-25	1078.12
2021-10-22	1076.23
2021-10-21	1076.64
2021-10-20	1078.44
2021-10-19	1077.52
2021-10-18	1078.78
2021-10-15	1081.68
2021-10-14	1081.55
2021-10-13	1079.31
2021-10-12	1078.09
2021-10-11	1080.53
2021-10-08	1082.37
2021-10-07	1084.21
2021-10-06	1083.74
2021-10-05	1084.3
2021-10-04	1085.57
2021-10-01	1085.81
2021-09-30	1085.56
2021-09-29	1085.94
2021-09-28	1085.28
2021-09-27	1086.35
2021-09-24	1086.51
2021-09-23	1087.24
2021-09-22	1090.62
2021-09-21	1090.82
2021-09-20	1090.17
2021-09-17	1089.02
2021-09-16	1090.11
2021-09-15	1090.34
2021-09-14	1091.2
2021-09-13	1090.96
2021-09-10	1090.81
2021-09-09	1091.94
2021-09-08	1090.08
2021-09-07	1090.08
2021-09-06	1092.4
2021-09-03	1092.25
2021-09-02	1093.26
2021-09-01	1092.41
2021-08-31	1092.84
2021-08-30	1094.96
2021-08-27	1094.19
2021-08-26	1094.11
2021-08-25	1094.7
2021-08-24	1096.79
2021-08-23	1097.26
2021-08-20	1097.87
2021-08-19	1097.69
2021-08-18	1097.6
2021-08-17	1097.15
2021-08-16	1097.27
2021-08-13	1096.82
2021-08-12	1096.89
2021-08-11	1096.97
2021-08-10	1097.09
2021-08-09	1097.09
2021-08-06	1097.31
2021-08-05	1099.36
2021-08-04	1098.96
2021-08-03	1098.67
2021-08-02	1098.5
2021-07-30	1097.34
2021-07-29	1097.04
2021-07-28	1097.19
2021-07-27	1096.39
2021-07-26	1095.07
2021-07-23	1094.96
2021-07-22	1094.92
2021-07-21	1093.56
2021-07-20	1094.36
2021-07-19	1093.13
2021-07-16	1091.83
2021-07-15	1090.82
2021-07-14	1090.45
2021-07-13	1089.69
2021-07-12	1089.31
2021-07-09	1088.96
2021-07-08	1090.06
2021-07-07	1089.29
2021-07-06	1087.89
2021-07-05	1085.42
2021-07-02	1086.4
2021-07-01	1085.06
2021-06-30	1086.29
2021-06-29	1084.93
2021-06-28	1085.24
2021-06-25	1083.93
2021-06-24	1085.11
2021-06-23	1084.95
2021-06-22	1084.12
2021-06-21	1084.81
2021-06-18	1086.35
2021-06-17	1086.3
2021-06-16	1087.04
2021-06-15	1086.67
2021-06-14	1087.4
2021-06-11	1087.87
2021-06-10	1086.81
2021-06-09	1086.68
2021-06-08	1085.31
2021-06-07	1084.5
2021-06-04	1084.75
2021-06-03	1083.54
2021-06-02	1083.78
2021-06-01	1082.65
2021-05-31	1082.56
2021-05-28	1082.69
2021-05-27	1081.88
2021-05-26	1083.22
2021-05-25	1081.55
2021-05-24	1080.34
2021-05-21	1079.82
2021-05-20	1078.72
2021-05-19	1079.52
2021-05-18	1079.75
2021-05-17	1080
2021-05-14	1080.25
2021-05-13	1079.97
2021-05-12	1080.79
2021-05-11	1082.47
2021-05-10	1084.82
2021-05-07	1085.15
2021-05-06	1085.41
2021-05-05	1085.28
2021-05-04	1085.4
2021-05-03	1083.75
2021-04-30	1083.3
2021-04-29	1082.5
2021-04-28	1083.91
2021-04-27	1084.64
2021-04-26	1084.84
2021-04-23	1084.6
2021-04-22	1084.84
2021-04-21	1084.7
2021-04-20	1084.43
2021-04-19	1083.52
2021-04-16	1084.44
2021-04-15	1085.41
2021-04-14	1083.78
2021-04-13	1085.14
2021-04-12	1084.93
2021-04-09	1084.55
2021-04-08	1086.88
2021-04-07	1085.98
2021-04-06	1086.02
2021-04-05	1085.52
2021-04-02	1085.52
2021-04-01	1085.52
2021-03-31	1084.55
2021-03-30	1083.49
2021-03-29	1085.4
2021-03-26	1086.69
2021-03-25	1087.39
2021-03-24	1086.56
2021-03-23	1086.08
2021-03-22	1085.3
2021-03-19	1084.6
2021-03-18	1083.24
2021-03-17	1084.21
2021-03-16	1086.14
2021-03-15	1086.28
2021-03-12	1084.55
2021-03-11	1085.7
2021-03-10	1084.99
2021-03-09	1084.69
2021-03-08	1084.27
2021-03-05	1085
2021-03-04	1085.91
2021-03-03	1084.95
2021-03-02	1086.86
2021-03-01	1086.21
2021-02-26	1082.3
2021-02-25	1081.95
2021-02-24	1085.51
2021-02-23	1086.18
2021-02-22	1087.27
2021-02-19	1086.17
2021-02-18	1087.02
2021-02-17	1088.2
2021-02-16	1087.55
2021-02-15	1088.61
2021-02-12	1090.35
2021-02-11	1091.79
2021-02-10	1090.83
2021-02-09	1090.91
2021-02-08	1090.6
2021-02-05	1090.38
2021-02-04	1090.22
2021-02-03	1090.66
2021-02-02	1090.57
2021-02-01	1091.08
2021-01-29	1090.6
2021-01-28	1091.62
2021-01-27	1092.59
2021-01-26	1092.15
2021-01-25	1093.17
2021-01-22	1091.51
2021-01-21	1090.51
2021-01-20	1092.11
2021-01-19	1091.62
2021-01-18	1091.47
2021-01-15	1092.25
2021-01-14	1093.19
2021-01-13	1091.63
2021-01-12	1089.69
2021-01-11	1091.59
2021-01-08	1092.59
2021-01-07	1092.12
2021-01-06	1091.99
2021-01-05	1092.8
2021-01-04	1093.04
2021-01-01	1090.97
2020-12-31	1091.63
2020-12-30	1091.74
2020-12-29	1092.33
2020-12-28	1090.71
2020-12-25	1089.97
2020-12-24	1089.97
2020-12-23	1090.12
2020-12-22	1092.42
2020-12-21	1092.29
2020-12-18	1092.39
2020-12-17	1092.25
2020-12-16	1092.04
2020-12-15	1093.93
2020-12-14	1094.61
2020-12-11	1095.41
2020-12-10	1094.01
2020-12-09	1094.53
2020-12-08	1094.71
2020-12-07	1093.43
2020-12-04	1091.67
2020-12-03	1091.6
2020-12-02	1090.03
2020-12-01	1089.99
2020-11-30	1091.86
2020-11-27	1092.57
2020-11-26	1092.61
2020-11-25	1092.18
2020-11-24	1091.92
2020-11-23	1091.77
2020-11-20	1091.84
2020-11-19	1090.83
2020-11-18	1090.48
2020-11-17	1090.61
2020-11-16	1089.53
2020-11-13	1088.91
2020-11-12	1088.44
2020-11-11	1087.16
2020-11-10	1085.89
2020-11-09	1085.64
2020-11-06	1086.91
2020-11-05	1086.66
2020-11-04	1085.56
2020-11-03	1084.38
2020-11-02	1084.2
2020-10-30	1083.98
2020-10-29	1084.87
2020-10-28	1084.46
2020-10-27	1085.19
2020-10-26	1083.19
2020-10-23	1083.34
2020-10-22	1083.05
2020-10-21	1084.4
2020-10-20	1084.56
2020-10-19	1085.27
2020-10-16	1084.6
2020-10-15	1083.89
2020-10-14	1082.9
2020-10-13	1082.11
2020-10-12	1081.06
2020-10-09	1080.54
2020-10-08	1079.63
2020-10-07	1077.98
2020-10-06	1077.92
2020-10-05	1077.34
2020-10-02	1077.17
2020-10-01	1076.83
2020-09-30	1076.56
2020-09-29	1077.08
2020-09-28	1076.31
2020-09-25	1076.27
2020-09-24	1076.17
2020-09-23	1076.27
2020-09-22	1076.8
2020-09-21	1078.08
2020-09-18	1077.18
2020-09-17	1077.59
2020-09-16	1076.27
2020-09-15	1076.37
2020-09-14	1076.24
2020-09-11	1076.08
2020-09-10	1073.4
2020-09-09	1075.14
2020-09-08	1076.63
2020-09-07	1075.63
2020-09-04	1075.85
2020-09-03	1076.96
2020-09-02	1075.71
2020-09-01	1072.52
2020-08-31	1071.33
2020-08-28	1072.04
2020-08-27	1070.86
2020-08-26	1071.43
2020-08-25	1072.03
2020-08-24	1075.1
2020-08-21	1075.26
2020-08-20	1074.73
2020-08-19	1073.74
2020-08-18	1073.06
2020-08-17	1072.5
2020-08-14	1071.08
2020-08-13	1070.51
2020-08-12	1071.89
2020-08-11	1072.27
2020-08-10	1073.31
2020-08-07	1071.41
2020-08-06	1071.91
2020-08-05	1069.93
2020-08-04	1070.56
2020-08-03	1068.96
2020-07-31	1070.01
2020-07-30	1070.03
2020-07-29	1068.59
2020-07-28	1069.04
2020-07-27	1067.75
2020-07-24	1065.47
2020-07-23	1067.17
2020-07-22	1067.12
2020-07-21	1064.56
2020-07-20	1062.93
2020-07-17	1061.52
2020-07-16	1061.83
2020-07-15	1059.73
2020-07-14	1058.14
2020-07-13	1056.59
2020-07-10	1058.79
2020-07-09	1058.37
2020-07-08	1056.99
2020-07-07	1056.2
2020-07-06	1056.9
2020-07-03	1056.26
2020-07-02	1055.75
2020-07-01	1052.37
2020-06-30	1056.35
2020-06-29	1056.27
2020-06-26	1057.05
2020-06-25	1056.86
2020-06-24	1056.14
2020-06-23	1055.51
2020-06-22	1057.03
2020-06-19	1056.22
2020-06-18	1055.8
2020-06-17	1056.71
2020-06-16	1056.63
2020-06-15	1053.29
2020-06-12	1054.2
2020-06-11	1053.25
2020-06-10	1052.19
2020-06-09	1052.62
2020-06-08	1054
2020-06-05	1049.49
2020-06-04	1043.62
2020-06-03	1041.3
2020-06-02	1040.15
2020-06-01	1038.06
2020-05-29	1038.99
2020-05-28	1037.26
2020-05-27	1035.73
2020-05-26	1032.83
2020-05-25	1032.28
2020-05-22	1032.27
2020-05-21	1032.6
2020-05-20	1029.65
2020-05-19	1027.8
2020-05-18	1027.93
2020-05-15	1029.55
2020-05-14	1029.61
2020-05-13	1030.91
2020-05-12	1031.06
2020-05-11	1031.7
2020-05-08	1032.35
2020-05-07	1032.48
2020-05-06	1031.41
2020-05-05	1034.72
2020-05-04	1033.03
2020-05-01	1035.15

## Sheet: VIXIE
2025-01-24	22.97
2025-01-23	23.33
2025-01-22	23.52
2025-01-21	24.07
2025-01-17	25.01
2025-01-16	26.09
2025-01-15	27.76
2025-01-14	30.81
2025-01-13	32.07
2025-01-10	29.81
2025-01-09	28.62
2025-01-08	27.82
2025-01-07	28.01
2025-01-06	27.26
2025-01-03	30.37
2025-01-02	29.95
2024-12-31	32.14
2024-12-30	32.6
2024-12-27	29.92
2024-12-24	30.56
2024-12-23	31.41
2024-12-20	30.3
2024-12-19	30.22
2024-12-18	24.98
2024-12-17	25.86
2024-12-16	24.24
2024-12-13	24.51
2024-12-12	22.65
2024-12-11	22.24
2024-12-10	24.8
2024-12-09	23.41
2024-12-06	23.86
2024-12-05	24.55
2024-12-04	27.12
2024-12-03	28.68
2024-12-02	28.77
2024-11-29	27.68
2024-11-27	31.41
2024-11-26	32.53
2024-11-25	31.83
2024-11-22	32.87
2024-11-21	31.52
2024-11-20	31.11
2024-11-19	30.05
2024-11-18	27.82
2024-11-15	28.13
2024-11-14	26.29
2024-11-13	27.32
2024-11-12	27.23
2024-11-08	27.12
2024-11-07	27.26
2024-11-06	30.62
2024-11-05	35.02
2024-11-04	36.3
2024-11-01	35.14
2024-10-31	35.99
2024-10-30	33.33
2024-10-29	32.82
2024-10-28	31.88
2024-10-25	32.48
2024-10-24	33.18
2024-10-23	33.97
2024-10-22	32.27
2024-10-21	31.3
2024-10-18	28.21
2024-10-17	29.03
2024-10-16	30.4
2024-10-15	30.05
2024-10-11	30
2024-10-10	29.31
2024-10-09	30.73
2024-10-08	33.51
2024-10-07	33.7
2024-10-04	34.22
2024-10-03	36.19
2024-10-02	35.7
2024-10-01	36.11
2024-09-30	33.02
2024-09-27	30.09
2024-09-26	30.67
2024-09-25	32.49
2024-09-24	32.51
2024-09-23	32.56
2024-09-20	30.55
2024-09-19	27.89
2024-09-18	30.02
2024-09-17	29.24
2024-09-16	30.02
2024-09-13	29.69
2024-09-12	32.41
2024-09-11	38.37
2024-09-10	37.61
2024-09-09	35.22
2024-09-06	35.64
2024-09-05	34.74
2024-09-04	33.67
2024-09-03	32.8
2024-08-30	29.27
2024-08-29	28.65
2024-08-28	29.39
2024-08-27	28.33
2024-08-23	27.84
2024-08-22	29.24
2024-08-21	29.3
2024-08-20	30.57
2024-08-19	28.64
2024-08-16	27.91
2024-08-15	29.68
2024-08-14	36.12
2024-08-13	41.29
2024-08-12	41.51
2024-08-09	41.9
2024-08-08	42.54
2024-08-07	44.04
2024-08-06	52.53
2024-08-05	57
2024-08-02	47.01
2024-08-01	35.83
2024-07-31	27.35
2024-07-30	28.45
2024-07-29	28.48
2024-07-26	28
2024-07-25	29.7
2024-07-24	29.58
2024-07-23	28.03
2024-07-22	27.48
2024-07-19	29.33
2024-07-18	28.35
2024-07-17	25.95
2024-07-16	25.27
2024-07-15	23.78
2024-07-12	22.83
2024-07-11	24.1
2024-07-10	23.8
2024-07-09	28.18
2024-07-08	26.48
2024-07-05	30.01
2024-07-03	30.34
2024-07-02	34.35
2024-07-01	36.28
2024-06-28	43.67
2024-06-27	39.78
2024-06-26	39.67
2024-06-25	38.31
2024-06-24	37.16
2024-06-21	39.19
2024-06-20	37.49
2024-06-18	36.84
2024-06-17	42.24
2024-06-14	40.84
2024-06-13	30.18
2024-06-12	25.84
2024-06-11	28.86
2024-06-10	24.73
2024-06-07	22.17
2024-06-06	22.96
2024-06-05	23.17
2024-06-04	24.31
2024-06-03	22.94
2024-05-31	23.96
2024-05-30	23.68
2024-05-29	24.45
2024-05-28	23.24
2024-05-24	22.17
2024-05-23	22.43
2024-05-22	21.99
2024-05-21	21.88
2024-05-20	21.37
2024-05-17	21.14
2024-05-16	21.96
2024-05-15	22.49
2024-05-14	24.45
2024-05-13	24.18
2024-05-10	23.67
2024-05-09	24.2
2024-05-08	24.75
2024-05-07	25.45
2024-05-03	26.04
2024-05-02	28.19
2024-05-01	30.35
2024-04-30	29.18
2024-04-29	27.28
2024-04-26	28.72
2024-04-25	31.33
2024-04-24	29.46
2024-04-23	27.94
2024-04-22	31.9
2024-04-19	34.34
2024-04-18	33.54
2024-04-17	38.54
2024-04-16	40.03
2024-04-15	35.59
2024-04-12	33.16
2024-04-11	29
2024-04-10	28.36
2024-04-09	27.75
2024-04-08	27.07
2024-04-05	26.99
2024-04-04	24.98
2024-04-03	25.79
2024-04-02	26.8
2024-03-28	24.21
2024-03-27	25.33
2024-03-26	25.63
2024-03-25	25.99
2024-03-22	27.95
2024-03-21	23.99
2024-03-20	26.53
2024-03-19	25.72
2024-03-18	26.04
2024-03-15	26.39
2024-03-14	23.94
2024-03-13	21.96
2024-03-12	23.4
2024-03-11	24.08
2024-03-08	23.07
2024-03-07	23.61
2024-03-06	24.44
2024-03-05	25.78
2024-03-04	24.86
2024-03-01	25.99
2024-02-29	26.42
2024-02-28	27
2024-02-27	26.86
2024-02-26	26.21
2024-02-23	24.95
2024-02-22	24.43
2024-02-21	26.74
2024-02-20	27.43
2024-02-16	25.08
2024-02-15	25.79
2024-02-14	26.7
2024-02-13	28.47
2024-02-12	27.44
2024-02-09	28.64
2024-02-08	30.19
2024-02-07	30.83
2024-02-06	29.51
2024-02-05	29.88
2024-02-02	28.36
2024-02-01	31.37
2024-01-31	29.57
2024-01-30	26.73
2024-01-29	26.9
2024-01-26	25.2
2024-01-25	26.07
2024-01-24	26.56
2024-01-23	28.44
2024-01-22	26.25
2024-01-19	26.79
2024-01-18	28.89
2024-01-17	30.53
2024-01-16	27.5
2024-01-12	24.78
2024-01-11	25.45
2024-01-10	24.14
2024-01-09	30.04
2024-01-08	31.6
2024-01-05	33.81
2024-01-04	34.63
2024-01-03	36.58
2024-01-02	31.26
2023-12-29	26.06
2023-12-28	26.87
2023-12-27	26.86
2023-12-22	26.17
2023-12-21	27.06
2023-12-20	26.95
2023-12-19	26.51
2023-12-18	28.7
2023-12-15	26.65
2023-12-14	23.78
2023-12-13	25.52
2023-12-12	28.86
2023-12-11	30.41
2023-12-08	30.84
2023-12-07	30.63
2023-12-06	30.92
2023-12-05	30.67
2023-12-04	29.74
2023-12-01	29.21
2023-11-30	29.91
2023-11-29	27.77
2023-11-28	30.1
2023-11-27	29.97
2023-11-24	27.7
2023-11-22	27.42
2023-11-21	27.77
2023-11-20	27.27
2023-11-17	28.41
2023-11-16	29.71
2023-11-15	28.41
2023-11-14	27.37
2023-11-13	30.46
2023-11-10	32.79
2023-11-09	32.33
2023-11-08	32.95
2023-11-07	37.74
2023-11-06	37.85
2023-11-03	37.58
2023-11-02	39.78
2023-11-01	45.46
2023-10-31	48.5
2023-10-30	51.73
2023-10-27	53.44
2023-10-26	54.53
2023-10-25	51.48
2023-10-24	49.8
2023-10-23	53.68
2023-10-20	56.28
2023-10-19	52.75
2023-10-18	51.18
2023-10-17	48.76
2023-10-16	47.89
2023-10-13	48.28
2023-10-12	43.62
2023-10-11	45.32
2023-10-10	45.78
2023-10-09	53.79
2023-10-06	50.96
2023-10-05	54.19
2023-10-04	52.39
2023-10-03	50.71
2023-10-02	44.72
2023-09-29	41.14
2023-09-28	42.4
2023-09-27	43.44
2023-09-26	41.43
2023-09-25	38.26
2023-09-22	37.22
2023-09-21	36.7
2023-09-20	32.79
2023-09-19	32.87
2023-09-18	32.87
2023-09-15	32.2
2023-09-14	31.6
2023-09-13	33.64
2023-09-12	36.46
2023-09-11	35.33
2023-09-08	36.07
2023-09-07	37.38
2023-09-06	37.85
2023-09-05	35.07
2023-09-04	34.48
2023-09-01	34.97
2023-08-31	35.71
2023-08-30	35.22
2023-08-29	36.34
2023-08-25	40.24
2023-08-24	40.75
2023-08-23	41.41
2023-08-22	45.41
2023-08-21	46.61
2023-08-18	46.83
2023-08-17	43.77
2023-08-16	41.18
2023-08-15	39.4
2023-08-14	37.68
2023-08-11	37.24
2023-08-10	35.96
2023-08-09	38.81
2023-08-08	42.19
2023-08-07	39.33
2023-08-04	37.85
2023-08-03	40.74
2023-08-02	39.01
2023-08-01	34.9
2023-07-31	32.52
2023-07-28	30.14
2023-07-27	31.23
2023-07-26	33.86
2023-07-25	34.02
2023-07-24	34.03
2023-07-21	33.06
2023-07-20	35.1
2023-07-19	32.81
2023-07-18	32.66
2023-07-17	34.84
2023-07-14	32.9
2023-07-13	31.45
2023-07-12	30.1
2023-07-11	33.25
2023-07-10	36.28
2023-07-07	37.88
2023-07-06	39.23
2023-07-05	33.79
2023-07-04	32.23
2023-07-03	32.02
2023-06-30	31.71
2023-06-29	34.89
2023-06-28	35.73
2023-06-27	37.36
2023-06-26	38.61
2023-06-23	36.51
2023-06-22	35.64
2023-06-21	35.06
2023-06-20	35.14
2023-06-19	34.37
2023-06-16	33.65
2023-06-15	36.44
2023-06-14	35.3
2023-06-13	37.73
2023-06-12	37.42
2023-06-09	37.64
2023-06-08	37.87
2023-06-07	37.93
2023-06-06	38.71
2023-06-05	39.93
2023-06-02	39.01
2023-06-01	42.39
2023-05-31	45.96
2023-05-30	43.2
2023-05-26	43.06
2023-05-25	45.49
2023-05-24	47.17
2023-05-23	42.65
2023-05-22	42.21
2023-05-19	41.88
2023-05-18	44.07
2023-05-17	47.66
2023-05-16	48.21
2023-05-15	47.95
2023-05-12	46.82
2023-05-11	49.14
2023-05-10	50.73
2023-05-09	53.93
2023-05-05	53.06
2023-05-04	56.41
2023-05-03	52.76
2023-05-02	51.37
2023-04-28	47.2
2023-04-27	48.89
2023-04-26	51.67
2023-04-25	49.81
2023-04-24	48.05
2023-04-21	48.74
2023-04-20	49.38
2023-04-19	46.72
2023-04-18	45.63
2023-04-17	47.2
2023-04-14	46.86
2023-04-13	49.09
2023-04-12	50.45
2023-04-11	53.02
2023-04-06	57.44
2023-04-05	58.73
2023-04-04	56.51
2023-04-03	56.95
2023-03-31	57.01
2023-03-30	60.93
2023-03-29	64.89
2023-03-28	71.81
2023-03-27	72.62
2023-03-24	78.35
2023-03-23	69.16
2023-03-22	65.87
2023-03-21	69.93
2023-03-20	87
2023-03-17	101.36
2023-03-16	99.33
2023-03-15	83.94
2023-03-14	68.68
2023-03-13	65.28
2023-03-10	47.06
2023-03-09	40.73
2023-03-08	39.86
2023-03-07	41.37
2023-03-06	41.07
2023-03-03	43.49
2023-03-02	46.86
2023-03-01	45.96
2023-02-28	45.99
2023-02-27	45.74
2023-02-24	47.16
2023-02-23	46.34
2023-02-22	48.05
2023-02-21	48.51
2023-02-20	44.89
2023-02-17	45.04
2023-02-16	41.93
2023-02-15	42.17
2023-02-14	42.47
2023-02-13	43.95
2023-02-10	43.72
2023-02-09	38.91
2023-02-08	40
2023-02-07	40.92
2023-02-06	41.23
2023-02-03	37.76
2023-02-02	38.73
2023-02-01	44.18
2023-01-31	45.04
2023-01-30	44.97
2023-01-27	42.99
2023-01-26	43.65
2023-01-25	45.57
2023-01-24	44.5
2023-01-23	44.57
2023-01-20	47.12
2023-01-19	46.97
2023-01-18	42.97
2023-01-17	44.35
2023-01-16	45.52
2023-01-13	44.12
2023-01-12	44.42
2023-01-11	45.59
2023-01-10	48.91
2023-01-09	46.34
2023-01-06	48.77
2023-01-05	52.96
2023-01-04	51.41
2023-01-03	55.2
2022-12-30	56.49
2022-12-29	57.97
2022-12-28	58.19
2022-12-23	58.35
2022-12-22	60.78
2022-12-21	63.09
2022-12-20	69.23
2022-12-19	67.32
2022-12-16	64.71
2022-12-15	53.9
2022-12-14	49.57
2022-12-13	50.86
2022-12-12	54.96
2022-12-09	53.37
2022-12-08	56.15
2022-12-07	55.28
2022-12-06	54.2
2022-12-05	51.59
2022-12-02	49.91
2022-12-01	49.32
2022-11-30	53.2
2022-11-29	52.54
2022-11-28	52.73
2022-11-25	47.36
2022-11-24	45.27
2022-11-23	48.15
2022-11-22	51.68
2022-11-21	54.08
2022-11-18	53.38
2022-11-17	57.14
2022-11-16	54.27
2022-11-15	51.95
2022-11-14	54.07
2022-11-11	53.75
2022-11-10	58.43
2022-11-09	66.75
2022-11-08	67.72
2022-11-07	69.3
2022-11-04	72.25
2022-11-03	77.41
2022-11-02	75.7
2022-11-01	76.27
2022-10-31	79.16
2022-10-28	76.45
2022-10-27	78.48
2022-10-26	78.38
2022-10-25	81.11
2022-10-24	86.24
2022-10-21	88.53
2022-10-20	88.84
2022-10-19	89.36
2022-10-18	88.33
2022-10-17	90.21
2022-10-14	94.1
2022-10-13	96.29
2022-10-12	98.23
2022-10-11	101.06
2022-10-10	100.05
2022-10-07	96.31
2022-10-06	90.59
2022-10-05	91.2
2022-10-04	87.8
2022-10-03	96.51
2022-09-30	98.37
2022-09-29	102.16
2022-09-28	99.5
2022-09-27	100.43
2022-09-26	97.76
2022-09-23	92.58
2022-09-22	89.01
2022-09-21	87.18
2022-09-20	83.37
2022-09-16	78.86
2022-09-15	74.34
2022-09-14	74.82
2022-09-13	76.57
2022-09-12	71.47
2022-09-09	75.06
2022-09-08	79.3
2022-09-07	80.12
2022-09-06	83.05
2022-09-05	85.13
2022-09-02	79.04
2022-09-01	88.44
2022-08-31	90.69
2022-08-30	89.23
2022-08-26	82.22
2022-08-25	76.61
2022-08-24	79.61
2022-08-23	81.62
2022-08-22	81.15
2022-08-19	70.47
2022-08-18	65.44
2022-08-17	66.17
2022-08-16	61.1
2022-08-15	57.22
2022-08-12	57.05
2022-08-11	58.28
2022-08-10	62.12
2022-08-09	71.09
2022-08-08	66.55
2022-08-05	69.39
2022-08-04	68.47
2022-08-03	68.99
2022-08-02	72.25
2022-08-01	68.29
2022-07-29	66.65
2022-07-28	72.01
2022-07-27	77.84
2022-07-26	77.22
2022-07-25	68.65
2022-07-22	67.16
2022-07-21	70.73
2022-07-20	71.34
2022-07-19	75.03
2022-07-18	80.13
2022-07-15	80.35
2022-07-14	84.36
2022-07-13	79.82
2022-07-12	79.2
2022-07-11	79.12
2022-07-08	78.34
2022-07-07	82.33
2022-07-06	88.37
2022-07-05	91.78
2022-07-04	86.47
2022-07-01	87.21
2022-06-30	87.93
2022-06-29	83.27
2022-06-28	78.81
2022-06-27	73.7
2022-06-24	75.11
2022-06-23	79.92
2022-06-22	77.4
2022-06-21	73.25
2022-06-20	76.62
2022-06-17	81.12
2022-06-16	81.99
2022-06-15	73.26
2022-06-14	74.89
2022-06-13	71.42
2022-06-10	60.87
2022-06-09	54.94
2022-06-08	50.68
2022-06-07	54.27
2022-06-06	52.69
2022-06-01	52.67
2022-05-31	51.19
2022-05-30	47.15
2022-05-27	49.3
2022-05-26	51.78
2022-05-25	58.23
2022-05-24	64.29
2022-05-23	63.47
2022-05-20	65.13
2022-05-19	69.56
2022-05-18	62.68
2022-05-17	59.29
2022-05-16	63.85
2022-05-13	63.05
2022-05-12	67.36
2022-05-11	66.15
2022-05-10	72.18
2022-05-09	75.74
2022-05-06	72.35
2022-05-05	66.03
2022-05-04	65.52
2022-05-03	62.58
2022-04-29	63.44
2022-04-28	62.88
2022-04-27	63.22
2022-04-26	63.48
2022-04-25	59.36
2022-04-22	54.41
2022-04-21	50.53
2022-04-20	52.96
2022-04-19	57.62
2022-04-14	55.18
2022-04-13	56.85
2022-04-12	57.82
2022-04-11	58.81
2022-04-08	57.97
2022-04-07	57.85
2022-04-06	57.65
2022-04-05	52.12
2022-04-04	44.34
2022-04-01	46.4
2022-03-31	47.74
2022-03-30	47.92
2022-03-29	46.97
2022-03-28	55.75
2022-03-25	56.61
2022-03-24	59.4
2022-03-23	59.29
2022-03-22	58.84
2022-03-21	61.02
2022-03-18	60.21
2022-03-17	61.82
2022-03-16	68.86
2022-03-15	77.76
2022-03-14	77.73
2022-03-11	78.51
2022-03-10	82.89
2022-03-09	79.9
2022-03-08	94.8
2022-03-07	99.96
2022-03-04	83.71
2022-03-03	72.57
2022-03-02	69.3
2022-03-01	65.6
2022-02-28	56.02
2022-02-25	49.47
2022-02-24	62.52
2022-02-23	53.53
2022-02-22	53.94
2022-02-21	55.75
2022-02-18	51.59
2022-02-17	49.33
2022-02-16	47.01
2022-02-15	47.5
2022-02-14	52.71
2022-02-11	50.47
2022-02-10	48.29
2022-02-09	44.9
2022-02-08	49.34
2022-02-07	55.26
2022-02-04	53.62
2022-02-03	44.41
2022-02-02	39.01
2022-02-01	39.79
2022-01-31	43.09
2022-01-28	44.52
2022-01-27	40.26
2022-01-26	37.65
2022-01-25	40.85
2022-01-24	42.04
2022-01-21	37.06
2022-01-20	33.45
2022-01-19	33.07
2022-01-18	33.82
2022-01-17	31.68
2022-01-14	30.56
2022-01-13	27.94
2022-01-12	27.08
2022-01-11	30.28
2022-01-10	31.85
2022-01-07	29.32
2022-01-06	28.81
2022-01-05	25.38
2022-01-04	24.46
2021-12-31	24.94
2021-12-30	25.27
2021-12-29	26.54
2021-12-24	25.57
2021-12-23	26.12
2021-12-22	28.34
2021-12-21	28.81
2021-12-20	31.37
2021-12-17	27.77
2021-12-16	26.19
2021-12-15	28.42
2021-12-14	28.93
2021-12-13	28.12
2021-12-10	31.13
2021-12-09	30.72
2021-12-08	33.94
2021-12-07	35.01
2021-12-06	41.4
2021-12-03	42.29
2021-12-02	42.51
2021-12-01	41.24
2021-11-30	43.29
2021-11-29	41.92
2021-11-26	41.32
2021-11-25	31.17
2021-11-24	29.93
2021-11-23	27.91
2021-11-22	25.04
2021-11-19	24.48
2021-11-18	23.72
2021-11-17	23.58
2021-11-16	22.83
2021-11-15	22.99
2021-11-12	22.8
2021-11-11	22.97
2021-11-10	22.36
2021-11-09	22.59
2021-11-08	21.45
2021-11-05	21.58
2021-11-04	23.41
2021-11-03	25.52
2021-11-02	26.11
2021-11-01	26.27
2021-10-29	25.86
2021-10-28	23.84
2021-10-27	22.13
2021-10-26	22.34
2021-10-25	24.25
2021-10-22	23.96
2021-10-21	25.04
2021-10-20	25.45
2021-10-19	26.03
2021-10-18	27.74
2021-10-15	26.67
2021-10-14	27.98
2021-10-13	31.57
2021-10-12	33.11
2021-10-11	33.39
2021-10-08	30.4
2021-10-07	30.15
2021-10-06	34
2021-10-05	29.32
2021-10-04	29.44
2021-10-01	28.56
2021-09-30	27.89
2021-09-29	26.69
2021-09-28	26.88
2021-09-27	24.31
2021-09-24	24
2021-09-23	22.67
2021-09-22	24.73
2021-09-21	26.69
2021-09-20	28.19
2021-09-17	21.28
2021-09-16	20.63
2021-09-15	21.27
2021-09-14	21.66
2021-09-13	21.35
2021-09-10	20.68
2021-09-09	21.16
2021-09-08	21.75
2021-09-07	22.89
2021-09-06	22.17
2021-09-03	22.47
2021-09-02	20.86
2021-09-01	20.97
2021-08-31	21.53
2021-08-27	22.03
2021-08-26	23.02
2021-08-25	22.54
2021-08-24	22.65
2021-08-23	22.88
2021-08-20	24.81
2021-08-19	25.18
2021-08-18	22.7
2021-08-17	22.39
2021-08-16	21.46
2021-08-13	20.74
2021-08-12	20.92
2021-08-11	21.5
2021-08-10	22.55
2021-08-09	22.66
2021-08-06	22.62
2021-08-05	23.11
2021-08-04	23.74
2021-08-03	23.77
2021-08-02	22.91
2021-07-30	23.37
2021-07-29	23.14
2021-07-28	24.72
2021-07-27	25.11
2021-07-26	24.17
2021-07-23	23.76
2021-07-22	24.75
2021-07-21	26.77
2021-07-20	28.48
2021-07-19	27.82
2021-07-16	23.66
2021-07-15	23.15
2021-07-14	22.18
2021-07-13	23.13
2021-07-12	23.07
2021-07-09	23.66
2021-07-08	25.73
2021-07-07	22.05
2021-07-06	21.97
2021-07-05	20.49
2021-07-02	21.24
2021-07-01	21.62
2021-06-30	21.31
2021-06-29	20.83
2021-06-28	20.34
2021-06-25	19.63
2021-06-24	19.76
2021-06-23	20.28
2021-06-22	21.61
2021-06-21	21.48
2021-06-18	20.41
2021-06-17	20.46
2021-06-16	20.23
2021-06-15	20.32
2021-06-14	19.49
2021-06-11	19.59
2021-06-10	20.79
2021-06-09	21.71
2021-06-08	24.9
2021-06-07	25.77
2021-06-04	24.92
2021-06-03	25.82
2021-06-02	25.63
2021-06-01	23.83
2021-05-28	24.94
2021-05-27	26.17
2021-05-26	27.24
2021-05-25	27.66
2021-05-24	30.65
2021-05-21	31.35
2021-05-20	31.46
2021-05-19	31.68
2021-05-18	31.17
2021-05-17	30.84
2021-05-14	31.32
2021-05-13	29.73
2021-05-12	29.35
2021-05-11	27.65
2021-05-10	25.86
2021-05-07	25.92
2021-05-06	27.06
2021-05-05	26
2021-05-04	26.81
2021-04-30	25.09
2021-04-29	25.67
2021-04-28	26.25
2021-04-27	27.02
2021-04-26	26.77
2021-04-23	27.51
2021-04-22	28.27
2021-04-21	28.24
2021-04-20	28.7
2021-04-19	26.93
2021-04-16	23.34
2021-04-15	23.18
2021-04-14	24.58
2021-04-13	26.53
2021-04-12	25.37
2021-04-09	25.94
2021-04-08	25.48
2021-04-07	25.83
2021-04-06	26
2021-04-01	24.5
2021-03-31	26.52
2021-03-30	28.83
2021-03-29	29.15
2021-03-26	28.6
2021-03-25	29.62
2021-03-24	28.59
2021-03-23	28.86
2021-03-22	30.39
2021-03-19	29.42
2021-03-18	29.17
2021-03-17	30.41
2021-03-16	28.81
2021-03-15	30.03
2021-03-12	29.03
2021-03-11	27.96
2021-03-10	30.09
2021-03-09	32.29
2021-03-08	33.68
2021-03-05	34.92
2021-03-04	32.25
2021-03-03	32.1
2021-03-02	31.66
2021-03-01	33.31
2021-02-26	38.32
2021-02-25	33.95
2021-02-24	31.06
2021-02-23	32.17
2021-02-22	30.34
2021-02-19	28.58
2021-02-18	29.95
2021-02-17	29.7
2021-02-16	28.49
2021-02-15	27.2
2021-02-12	27.59
2021-02-11	27.7
2021-02-10	28.67
2021-02-09	30.68
2021-02-08	29.72
2021-02-05	30
2021-02-04	30.95
2021-02-03	33.5
2021-02-02	34.72
2021-02-01	37.37
2021-01-29	38.27
2021-01-28	38.54
2021-01-27	36.78
2021-01-26	33.64
2021-01-25	34.82
2021-01-22	32.92
2021-01-21	33.11
2021-01-20	32.98
2021-01-19	35.5
2021-01-18	37.71
2021-01-15	36.67
2021-01-14	34.78
2021-01-13	34.95
2021-01-12	38.44
2021-01-11	37.68
2021-01-08	35.2
2021-01-07	36.16
2021-01-06	37.25
2021-01-05	38.89
2021-01-04	36.52
2020-12-31	38.48
2020-12-30	37.76
2020-12-29	37.86
2020-12-24	39.93
2020-12-23	44.12
2020-12-22	48.45
2020-12-21	50.02
2020-12-18	37.3
2020-12-17	33.89
2020-12-16	35.08
2020-12-15	37.32
2020-12-14	38.35
2020-12-11	41.65
2020-12-10	37.31
2020-12-09	33.93
2020-12-08	36.68
2020-12-07	35.24
2020-12-04	32.14
2020-12-03	30.88
2020-12-02	31.49
2020-12-01	31.4
2020-11-30	34.46
2020-11-27	33.62
2020-11-26	34.54
2020-11-25	34.46
2020-11-24	33.73
2020-11-23	37.33
2020-11-20	38.71
2020-11-19	38.59
2020-11-18	36.72
2020-11-17	37.34
2020-11-16	37.77
2020-11-13	40.38
2020-11-12	40.17
2020-11-11	38.03
2020-11-10	38.18
2020-11-09	37.11
2020-11-06	38.48
2020-11-05	40.5
2020-11-04	47.59
2020-11-03	54.96
2020-11-02	59.94
2020-10-30	63.42
2020-10-29	64.51
2020-10-28	65.97
2020-10-27	52.34
2020-10-26	50.1
2020-10-23	45.41
2020-10-22	45.61
2020-10-21	44.09
2020-10-20	44.16
2020-10-19	43.03
2020-10-16	42.58
2020-10-15	48.18
2020-10-14	41.51
2020-10-13	39.19
2020-10-12	37.58
2020-10-09	38.85
2020-10-08	39.93
2020-10-07	40.56
2020-10-06	42.01
2020-10-05	46.54
2020-10-02	48.79
2020-10-01	49.25
2020-09-30	50.2
2020-09-29	52.08
2020-09-28	51.53
2020-09-25	55.38
2020-09-24	55.49
2020-09-23	47.99
2020-09-22	48.95
2020-09-21	47.86
2020-09-18	37.34
2020-09-17	36.57
2020-09-16	34.86
2020-09-15	34.95
2020-09-14	35.69
2020-09-11	37.07
2020-09-10	33.37
2020-09-09	34.73
2020-09-08	37.28
2020-09-07	35.77
2020-09-04	36.39
2020-09-03	33.99
2020-09-02	31.62
2020-09-01	33.74
2020-08-28	35.36
2020-08-27	35.89
2020-08-26	36.95
2020-08-25	37.02
2020-08-24	35.99
2020-08-21	37.8
2020-08-20	38.34
2020-08-19	36.74
2020-08-18	36
2020-08-17	35.06
2020-08-14	34.69
2020-08-13	33.41
2020-08-12	31.66
2020-08-11	33.93
2020-08-10	35.96
2020-08-07	35.76
2020-08-06	37.43
2020-08-05	38.25
2020-08-04	39.31
2020-08-03	41.3
2020-07-31	43.62
2020-07-30	44.66
2020-07-29	42.75
2020-07-28	43.94
2020-07-27	42.09
2020-07-24	40.87
2020-07-23	40.34
2020-07-22	40.74
2020-07-21	40.08
2020-07-20	42.83
2020-07-17	46.57
2020-07-16	45.95
2020-07-15	44.75
2020-07-14	46.14
2020-07-13	44.53
2020-07-10	47.56
2020-07-09	47.12
2020-07-08	50.37
2020-07-07	49.94
2020-07-06	48.68
2020-07-03	53.74
2020-07-02	53.95
2020-07-01	57.12
2020-06-30	58.92
2020-06-29	65.53
2020-06-26	67.08
2020-06-25	66.96
2020-06-24	65.1
2020-06-23	57.27
2020-06-22	64.14
2020-06-19	60.77
2020-06-18	61.82
2020-06-17	57.37
2020-06-16	56.47
2020-06-15	66.93
2020-06-12	64.12
2020-06-11	65.25
2020-06-10	58.96
2020-06-09	56.28
2020-06-08	49.78
2020-06-05	45.8
2020-06-04	50.34
2020-06-03	50.2
2020-06-02	53.08
2020-06-01	57.11
2020-05-29	57.72
2020-05-28	54.95
2020-05-27	54.9
2020-05-26	57.88
2020-05-22	63.19
2020-05-21	62.52
2020-05-20	61.91
2020-05-19	67.59
2020-05-18	73.5
2020-05-15	82.97
2020-05-14	84.86
2020-05-13	81.69
2020-05-12	80.6
2020-05-11	83.16
2020-05-07	88.69
2020-05-06	89.6
2020-05-05	89.39
2020-05-04	91.68
2020-05-01	87.07

## Sheet: CBI
2025-01-24	119.587
2025-01-23	119.734
2025-01-22	119.848
2025-01-21	119.835
2025-01-20	119.774
2025-01-17	119.668
2025-01-16	119.497
2025-01-15	119.358
2025-01-14	118.888
2025-01-13	118.998
2025-01-10	119.13
2025-01-09	119.299
2025-01-08	119.432
2025-01-07	119.506
2025-01-06	119.538
2025-01-03	119.701
2025-01-02	120.043
2024-12-31	120.067
2024-12-30	120.067
2024-12-27	119.868
2024-12-26	120.073
2024-12-25	120.073
2024-12-24	120.073
2024-12-23	120.073
2024-12-20	120.224
2024-12-19	120.103
2024-12-18	120.47
2024-12-17	120.537
2024-12-16	120.552
2024-12-13	120.499
2024-12-12	120.797
2024-12-11	121.028
2024-12-10	121.004
2024-12-09	120.947
2024-12-06	120.815
2024-12-05	120.705
2024-12-04	120.841
2024-12-03	120.777
2024-12-02	120.846
2024-11-29	120.534
2024-11-28	120.254
2024-11-27	120.011
2024-11-26	119.904
2024-11-25	119.956
2024-11-22	119.758
2024-11-21	119.487
2024-11-20	119.416
2024-11-19	119.508
2024-11-18	119.455
2024-11-15	119.597
2024-11-14	119.629
2024-11-13	119.418
2024-11-12	119.592
2024-11-11	119.632
2024-11-08	119.308
2024-11-07	119.075
2024-11-06	119.168
2024-11-05	118.695
2024-11-04	118.802
2024-11-01	118.714
2024-10-31	118.677
2024-10-30	118.79
2024-10-29	119.171
2024-10-28	119.388
2024-10-25	119.347
2024-10-24	119.554
2024-10-23	119.183
2024-10-22	119.12
2024-10-21	119.234
2024-10-18	119.644
2024-10-17	119.407
2024-10-16	119.372
2024-10-15	119.15
2024-10-14	118.812
2024-10-11	118.763
2024-10-10	118.775
2024-10-09	118.74
2024-10-08	118.756
2024-10-07	118.736
2024-10-04	118.852
2024-10-03	119.187
2024-10-02	119.244
2024-10-01	119.471
2024-09-30	119.075
2024-09-27	118.969
2024-09-26	118.816
2024-09-25	118.734
2024-09-24	118.996
2024-09-23	118.727
2024-09-20	118.382
2024-09-19	118.564
2024-09-18	118.274
2024-09-17	118.439
2024-09-16	118.514
2024-09-13	118.291
2024-09-12	118.213
2024-09-11	118.502
2024-09-10	118.381
2024-09-09	118.315
2024-09-06	118.257
2024-09-05	117.961
2024-09-04	117.919
2024-09-03	117.652
2024-09-02	117.374
2024-08-30	117.587
2024-08-29	117.59
2024-08-28	117.607
2024-08-27	117.52
2024-08-26	117.632
2024-08-23	117.734
2024-08-22	117.554
2024-08-21	117.751
2024-08-20	117.624
2024-08-19	117.391
2024-08-16	117.387
2024-08-15	117.234
2024-08-14	117.606
2024-08-13	117.582
2024-08-12	117.299
2024-08-09	117.354
2024-08-08	117.174
2024-08-07	117.147
2024-08-06	117.284
2024-08-05	117.192
2024-08-02	117.658
2024-08-01	117.552
2024-07-31	117.251
2024-07-30	117.081
2024-07-29	116.928
2024-07-26	116.748
2024-07-25	116.685
2024-07-24	116.564
2024-07-23	116.451
2024-07-22	116.199
2024-07-19	116.277
2024-07-18	116.475
2024-07-17	116.308
2024-07-16	116.296
2024-07-15	116.188
2024-07-12	116.068
2024-07-11	116.219
2024-07-10	115.819
2024-07-09	115.668
2024-07-08	115.831
2024-07-05	115.702
2024-07-04	115.402
2024-07-03	115.512
2024-07-02	115.13
2024-07-01	115.062
2024-06-28	115.275
2024-06-27	115.375
2024-06-26	115.308
2024-06-25	115.436
2024-06-24	115.355
2024-06-21	115.398
2024-06-20	115.242
2024-06-19	115.339
2024-06-18	115.324
2024-06-17	115.154
2024-06-14	115.51
2024-06-13	115.154
2024-06-12	115.053
2024-06-11	114.634
2024-06-10	114.42
2024-06-07	114.624
2024-06-06	114.971
2024-06-05	115.186
2024-06-04	115.087
2024-06-03	114.88
2024-05-31	114.541
2024-05-30	114.473
2024-05-29	114.399
2024-05-28	114.749
2024-05-27	114.822
2024-05-24	114.616
2024-05-23	114.507
2024-05-22	114.877
2024-05-21	114.99
2024-05-20	114.822
2024-05-17	114.876
2024-05-16	115.205
2024-05-15	115.264
2024-05-14	114.725
2024-05-13	114.905
2024-05-10	114.795
2024-05-09	114.914
2024-05-08	115.006
2024-05-07	115.158
2024-05-06	114.895
2024-05-03	114.754
2024-05-02	114.403
2024-05-01	114.217
2024-04-30	114.217
2024-04-29	114.569
2024-04-26	114.278
2024-04-25	114.033
2024-04-24	114.277
2024-04-23	114.603
2024-04-22	114.562
2024-04-19	114.287
2024-04-18	114.422
2024-04-17	114.504
2024-04-16	114.339
2024-04-15	114.791
2024-04-12	115.233
2024-04-11	114.704
2024-04-10	114.932
2024-04-09	115.245
2024-04-08	114.931
2024-04-05	115.057
2024-04-04	115.263
2024-04-03	114.969
2024-04-02	114.906
2024-04-01	115.207
2024-03-29	115.2
2024-03-28	115.2
2024-03-27	115.107
2024-03-26	114.79
2024-03-25	114.702
2024-03-22	114.95
2024-03-21	114.632
2024-03-20	114.37
2024-03-19	114.422
2024-03-18	114.309
2024-03-15	114.336
2024-03-14	114.463
2024-03-13	114.678
2024-03-12	114.654
2024-03-11	114.686
2024-03-08	114.796
2024-03-07	114.441
2024-03-06	114.195
2024-03-05	114.293
2024-03-04	113.936
2024-03-01	113.924
2024-02-29	113.814
2024-02-28	113.639
2024-02-27	113.766
2024-02-26	113.876
2024-02-23	114.096
2024-02-22	113.789
2024-02-21	113.7
2024-02-20	113.963
2024-02-19	113.737
2024-02-16	113.679
2024-02-15	113.913
2024-02-14	113.817
2024-02-13	113.572
2024-02-12	113.744
2024-02-09	113.608
2024-02-08	113.766
2024-02-07	114.042
2024-02-06	114.062
2024-02-05	113.923
2024-02-02	114.304
2024-02-01	114.888
2024-01-31	114.86
2024-01-30	114.324
2024-01-29	114.509
2024-01-26	114.142
2024-01-25	114.104
2024-01-24	113.68
2024-01-23	113.617
2024-01-22	113.763
2024-01-19	113.466
2024-01-18	113.41
2024-01-17	113.333
2024-01-16	113.788
2024-01-15	113.897
2024-01-12	114.081
2024-01-11	113.698
2024-01-10	113.54
2024-01-09	113.605
2024-01-08	113.793
2024-01-05	113.771
2024-01-04	113.927
2024-01-03	114.354
2024-01-02	114.546
2023-12-29	114.728
2023-12-28	115.054
2023-12-27	115.075
2023-12-22	114.805
2023-12-21	114.728
2023-12-20	114.595
2023-12-19	114.362
2023-12-18	114.138
2023-12-15	114.337
2023-12-14	113.899
2023-12-13	113.193
2023-12-12	112.885
2023-12-11	112.781
2023-12-08	112.774
2023-12-07	113.155
2023-12-06	113.092
2023-12-05	112.935
2023-12-04	112.523
2023-12-01	112.343
2023-11-30	111.738
2023-11-29	111.799
2023-11-28	111.294
2023-11-27	110.992
2023-11-24	110.516
2023-11-23	110.597
2023-11-22	110.791
2023-11-21	110.83
2023-11-20	110.603
2023-11-17	110.769
2023-11-16	110.865
2023-11-15	110.63
2023-11-14	110.618
2023-11-13	109.912
2023-11-10	109.882
2023-11-09	110.116
2023-11-08	110.09
2023-11-07	109.976
2023-11-06	109.814
2023-11-03	110.101
2023-11-02	109.847
2023-11-01	109.519
2023-10-31	109.254
2023-10-30	109.083
2023-10-27	108.916
2023-10-26	108.764
2023-10-25	108.598
2023-10-24	108.712
2023-10-23	108.386
2023-10-20	108.379
2023-10-19	108.114
2023-10-18	108.231
2023-10-17	108.399
2023-10-16	108.81
2023-10-13	108.963
2023-10-12	108.838
2023-10-11	108.998
2023-10-10	108.834
2023-10-09	108.803
2023-10-06	108.34
2023-10-05	108.432
2023-10-04	108.153
2023-10-03	108.362
2023-10-02	108.527
2023-09-29	108.787
2023-09-28	108.032
2023-09-27	108.65
2023-09-26	108.818
2023-09-25	108.956
2023-09-22	109.062
2023-09-21	109.09
2023-09-20	109.193
2023-09-19	109.037
2023-09-18	109.098
2023-09-15	109.282
2023-09-14	109.452
2023-09-13	109.097
2023-09-12	109.233
2023-09-11	109.225
2023-09-08	109.274
2023-09-07	109.098
2023-09-06	108.945
2023-09-05	109.23
2023-09-04	109.325
2023-09-01	109.509
2023-08-31	109.717
2023-08-30	109.293
2023-08-29	109.344
2023-08-28	109.081
2023-08-25	109.172
2023-08-24	109.417
2023-08-23	109.391
2023-08-22	108.788
2023-08-21	108.608
2023-08-18	108.955
2023-08-17	108.707
2023-08-16	108.916
2023-08-15	108.809
2023-08-14	109.016
2023-08-11	109.1
2023-08-10	109.473
2023-08-09	109.634
2023-08-08	109.768
2023-08-07	109.337
2023-08-04	109.305
2023-08-03	109.296
2023-08-02	109.454
2023-08-01	109.325
2023-07-31	109.544
2023-07-28	109.437
2023-07-27	109.331
2023-07-26	109.166
2023-07-25	109.416
2023-07-24	109.481
2023-07-21	109.259
2023-07-20	109.104
2023-07-19	109.406
2023-07-18	109.502
2023-07-17	108.956
2023-07-14	108.907
2023-07-13	108.95
2023-07-12	108.496
2023-07-11	107.919
2023-07-10	107.903
2023-07-07	107.921
2023-07-06	107.826
2023-07-05	108.472
2023-07-04	108.44
2023-07-03	108.334
2023-06-30	108.403
2023-06-29	108.341
2023-06-28	108.693
2023-06-27	108.48
2023-06-26	108.816
2023-06-23	108.653
2023-06-22	108.058
2023-06-21	108.423
2023-06-20	108.588
2023-06-19	108.125
2023-06-16	108.315
2023-06-15	108.104
2023-06-14	108.484
2023-06-13	108.579
2023-06-12	108.79
2023-06-09	108.683
2023-06-08	108.479
2023-06-07	108.312
2023-06-06	108.532
2023-06-05	108.472
2023-06-02	108.736
2023-06-01	108.98
2023-05-31	108.899
2023-05-30	108.562
2023-05-29	108.056
2023-05-26	107.641
2023-05-25	107.848
2023-05-24	108.012
2023-05-23	108.024
2023-05-22	108.02
2023-05-19	108.101
2023-05-18	107.925
2023-05-17	108.277
2023-05-16	108.449
2023-05-15	108.775
2023-05-12	108.941
2023-05-11	109.098
2023-05-10	108.835
2023-05-09	108.622
2023-05-08	108.688
2023-05-05	108.827
2023-05-04	109.193
2023-05-03	108.913
2023-05-02	109.015
2023-05-01	108.731
2023-04-28	108.726
2023-04-27	108.056
2023-04-26	108.329
2023-04-25	108.457
2023-04-24	107.96
2023-04-21	107.944
2023-04-20	108.091
2023-04-19	107.88
2023-04-18	108.139
2023-04-17	107.883
2023-04-14	107.939
2023-04-13	108.112
2023-04-12	108.002
2023-04-11	108.244
2023-04-06	108.812
2023-04-05	108.86
2023-04-04	108.481
2023-04-03	108.439
2023-03-31	107.947
2023-03-30	107.535
2023-03-29	107.554
2023-03-28	107.528
2023-03-27	107.885
2023-03-24	108.244
2023-03-23	108.2
2023-03-22	107.546
2023-03-21	107.553
2023-03-20	107.486
2023-03-17	107.759
2023-03-16	107.229
2023-03-15	107.941
2023-03-14	106.839
2023-03-13	107.97
2023-03-10	107.386
2023-03-09	106.71
2023-03-08	106.681
2023-03-07	106.531
2023-03-06	106.445
2023-03-03	106.434
2023-03-02	106.47
2023-03-01	106.556
2023-02-28	106.944
2023-02-27	107.278
2023-02-24	107.432
2023-02-23	107.81
2023-02-22	107.645
2023-02-21	107.599
2023-02-20	108.063
2023-02-17	108.093
2023-02-16	108.014
2023-02-15	108.095
2023-02-14	108.257
2023-02-13	108.563
2023-02-10	108.682
2023-02-09	109.1
2023-02-08	108.881
2023-02-07	109.196
2023-02-06	109.266
2023-02-03	109.653
2023-02-02	110.155
2023-02-01	108.582
2023-01-31	108.575
2023-01-30	108.457
2023-01-27	108.799
2023-01-26	108.863
2023-01-25	109.021
2023-01-24	108.912
2023-01-23	108.699
2023-01-20	108.744
2023-01-19	109.15
2023-01-18	109.462
2023-01-17	109.051
2023-01-16	108.55
2023-01-13	108.483
2023-01-12	108.313
2023-01-11	107.925
2023-01-10	107.425
2023-01-09	107.717
2023-01-06	107.737
2023-01-05	107.215
2023-01-04	107.422
2023-01-03	106.879
2022-12-30	106.239
2022-12-29	106.582
2022-12-28	106.398
2022-12-23	106.752
2022-12-22	106.973
2022-12-21	107.136
2022-12-20	107.148
2022-12-19	107.601
2022-12-16	107.637
2022-12-15	108.152
2022-12-14	109.059
2022-12-13	109.057
2022-12-12	108.731
2022-12-09	108.781
2022-12-08	109.328
2022-12-07	109.45
2022-12-06	109.346
2022-12-05	108.957
2022-12-02	108.825
2022-12-01	108.981
2022-11-30	108.104
2022-11-29	108.252
2022-11-28	107.816
2022-11-25	107.774
2022-11-24	108.234
2022-11-23	107.737
2022-11-22	107.493
2022-11-21	107.371
2022-11-18	107.219
2022-11-17	107.001
2022-11-16	107.115
2022-11-15	106.74
2022-11-14	106.408
2022-11-11	106.275
2022-11-10	106.624
2022-11-09	105.571
2022-11-08	105.172
2022-11-07	104.969
2022-11-04	104.969
2022-11-03	104.949
2022-11-02	105.478
2022-11-01	105.546
2022-10-31	105.251
2022-10-28	105.382
2022-10-27	105.743
2022-10-26	105.023
2022-10-25	104.756
2022-10-24	104.102
2022-10-21	103.726
2022-10-20	103.826
2022-10-19	104.003
2022-10-18	104.511
2022-10-17	104.287
2022-10-14	104.068
2022-10-13	104.07
2022-10-12	104.29
2022-10-11	104.605
2022-10-10	104.492
2022-10-07	105.015
2022-10-06	105.48
2022-10-05	105.847
2022-10-04	106.51
2022-10-03	106.053
2022-09-30	105.158
2022-09-29	104.82
2022-09-28	105.095
2022-09-27	105.155
2022-09-26	105.689
2022-09-23	106.092
2022-09-22	106.387
2022-09-21	106.855
2022-09-20	106.886
2022-09-16	107.66
2022-09-15	108.034
2022-09-14	108.296
2022-09-13	108.319
2022-09-12	108.854
2022-09-09	108.427
2022-09-08	108.115
2022-09-07	108.71
2022-09-06	108.55
2022-09-05	108.611
2022-09-02	108.991
2022-09-01	108.427
2022-08-31	108.748
2022-08-30	109.154
2022-08-26	110.105
2022-08-25	110.526
2022-08-24	110.181
2022-08-23	110.393
2022-08-22	110.569
2022-08-19	111.178
2022-08-18	112.001
2022-08-17	112.208
2022-08-16	113.079
2022-08-15	113.493
2022-08-12	112.97
2022-08-11	113.041
2022-08-10	113.324
2022-08-09	113.026
2022-08-08	113.234
2022-08-05	112.97
2022-08-04	113.681
2022-08-03	113.308
2022-08-02	113.759
2022-08-01	113.911
2022-07-29	113.608
2022-07-28	113.564
2022-07-27	112.682
2022-07-26	112.75
2022-07-25	112.489
2022-07-22	112.151
2022-07-21	110.936
2022-07-20	110.685
2022-07-19	110.16
2022-07-18	110.482
2022-07-15	110.786
2022-07-14	110.479
2022-07-13	110.753
2022-07-12	111.106
2022-07-11	110.562
2022-07-08	109.979
2022-07-07	109.759
2022-07-06	110.09
2022-07-05	109.723
2022-07-04	108.778
2022-07-01	109.418
2022-06-30	108.51
2022-06-29	108.182
2022-06-28	107.768
2022-06-27	108.302
2022-06-24	108.773
2022-06-23	108.829
2022-06-22	107.831
2022-06-21	107.264
2022-06-20	107.266
2022-06-17	107.514
2022-06-16	107.43
2022-06-15	108.077
2022-06-14	107.561
2022-06-13	108.28
2022-06-10	109.73
2022-06-09	110.525
2022-06-08	111.213
2022-06-07	111.549
2022-06-06	111.366
2022-06-01	112.094
2022-05-31	112.312
2022-05-30	112.697
2022-05-27	112.933
2022-05-26	112.697
2022-05-25	112.765
2022-05-24	112.778
2022-05-23	112.575
2022-05-20	112.893
2022-05-19	112.807
2022-05-18	112.831
2022-05-17	112.785
2022-05-16	113.223
2022-05-13	113.127
2022-05-12	113.296
2022-05-11	112.715
2022-05-10	112.649
2022-05-09	112.219
2022-05-06	112.247
2022-05-05	113.169
2022-05-04	113.324
2022-05-03	113.625
2022-05-02	113.675
2022-04-29	113.7
2022-04-28	113.945
2022-04-27	114.409
2022-04-26	114.658
2022-04-25	114.547
2022-04-22	114.19
2022-04-21	114.612
2022-04-20	115.085
2022-04-19	114.948
2022-04-14	115.32
2022-04-13	115.559
2022-04-12	115.477
2022-04-11	115.346
2022-04-08	115.916
2022-04-07	116.058
2022-04-06	116.287
2022-04-05	116.445
2022-04-04	116.991
2022-04-01	116.727
2022-03-31	116.846
2022-03-30	116.275
2022-03-29	116.365
2022-03-28	116.366
2022-03-25	116.417
2022-03-24	116.58
2022-03-23	116.751
2022-03-22	116.554
2022-03-21	116.869
2022-03-18	117.125
2022-03-17	116.889
2022-03-16	116.779
2022-03-15	116.952
2022-03-14	116.665
2022-03-11	117.04
2022-03-10	117.158
2022-03-09	117.549
2022-03-08	117.832
2022-03-07	118.501
2022-03-04	119.501
2022-03-03	118.913
2022-03-02	119.059
2022-03-01	119.483
2022-02-28	118.213
2022-02-25	117.969
2022-02-24	118.001
2022-02-23	118.267
2022-02-22	118.223
2022-02-21	118.746
2022-02-18	118.979
2022-02-17	118.829
2022-02-16	118.621
2022-02-15	118.383
2022-02-14	118.574
2022-02-11	118.694
2022-02-10	118.837
2022-02-09	119.208
2022-02-08	118.772
2022-02-07	118.774
2022-02-04	119.297
2022-02-03	120.216
2022-02-02	121.069
2022-02-01	121.078
2022-01-31	121.206
2022-01-28	121.598
2022-01-27	121.828
2022-01-26	122.012
2022-01-25	122.059
2022-01-24	122.209
2022-01-21	122.115
2022-01-20	121.952
2022-01-19	121.809
2022-01-18	121.845
2022-01-17	121.912
2022-01-14	122.1
2022-01-13	122.38
2022-01-12	122.298
2022-01-11	122.161
2022-01-10	122.275
2022-01-07	122.332
2022-01-06	122.443
2022-01-05	122.643
2022-01-04	122.629
2022-01-03	122.548
2021-12-31	122.789
2021-12-30	122.784
2021-12-29	122.844
2021-12-28	123.03
2021-12-27	123.042
2021-12-24	123.114
2021-12-23	123.11
2021-12-22	123.328
2021-12-21	123.406
2021-12-20	123.74
2021-12-17	123.708
2021-12-16	123.55
2021-12-15	123.574
2021-12-14	123.621
2021-12-13	123.718
2021-12-10	123.564
2021-12-09	123.582
2021-12-08	123.344
2021-12-07	123.62
2021-12-06	123.544
2021-12-03	123.405
2021-12-02	123.34
2021-12-01	123.012
2021-11-30	122.919
2021-11-29	122.803
2021-11-26	122.862
2021-11-25	122.905
2021-11-24	122.891
2021-11-23	123.092
2021-11-22	123.43
2021-11-19	123.632
2021-11-18	123.297
2021-11-17	123.106
2021-11-16	123.316
2021-11-15	123.431
2021-11-12	123.62
2021-11-11	123.519
2021-11-10	123.687
2021-11-09	123.927
2021-11-08	123.755
2021-11-05	123.861
2021-11-04	123.591
2021-11-03	123.193
2021-11-02	123.212
2021-11-01	122.735
2021-10-29	122.671
2021-10-28	123.045
2021-10-27	123.189
2021-10-26	123.007
2021-10-25	122.996
2021-10-22	122.826
2021-10-21	122.833
2021-10-20	123.021
2021-10-19	122.912
2021-10-18	123.071
2021-10-15	123.301
2021-10-14	123.303
2021-10-13	123.039
2021-10-12	122.913
2021-10-11	123.155
2021-10-08	123.354
2021-10-07	123.534
2021-10-06	123.496
2021-10-05	123.559
2021-10-04	123.71
2021-10-01	123.73
2021-09-30	123.614
2021-09-29	123.709
2021-09-28	123.61
2021-09-27	123.721
2021-09-24	123.757
2021-09-23	123.864
2021-09-22	124.182
2021-09-21	124.204
2021-09-20	124.154
2021-09-17	124.023
2021-09-16	124.138
2021-09-15	124.171
2021-09-14	124.249
2021-09-13	124.199
2021-09-10	124.192
2021-09-09	124.297
2021-09-08	124.114
2021-09-07	124.106
2021-09-06	124.35
2021-09-03	124.327
2021-09-02	124.43
2021-09-01	124.348
2021-08-31	124.408
2021-08-27	124.564
2021-08-26	124.565
2021-08-25	124.601
2021-08-24	124.849
2021-08-23	124.887
2021-08-20	124.948
2021-08-19	124.926
2021-08-18	124.932
2021-08-17	124.881
2021-08-16	124.889
2021-08-13	124.854
2021-08-12	124.847
2021-08-11	124.855
2021-08-10	124.878
2021-08-09	124.87
2021-08-06	124.886
2021-08-05	125.127
2021-08-04	125.042
2021-08-03	125.02
2021-08-02	124.974
2021-07-30	124.895
2021-07-29	124.834
2021-07-28	124.824
2021-07-27	124.743
2021-07-26	124.617
2021-07-23	124.591
2021-07-22	124.588
2021-07-21	124.469
2021-07-20	124.537
2021-07-19	124.42
2021-07-16	124.264
2021-07-15	124.173
2021-07-14	124.118
2021-07-13	124.035
2021-07-12	124.003
2021-07-09	123.945
2021-07-08	124.073
2021-07-07	123.996
2021-07-06	123.854
2021-07-05	123.567
2021-07-02	123.662
2021-07-01	123.504
2021-06-30	123.511
2021-06-29	123.35
2021-06-28	123.392
2021-06-25	123.236
2021-06-24	123.378
2021-06-23	123.346
2021-06-22	123.26
2021-06-21	123.319
2021-06-18	123.499
2021-06-17	123.472
2021-06-16	123.564
2021-06-15	123.523
2021-06-14	123.606
2021-06-11	123.647
2021-06-10	123.513
2021-06-09	123.509
2021-06-08	123.351
2021-06-07	123.238
2021-06-04	123.276
2021-06-03	123.132
2021-06-02	123.166
2021-06-01	123.041
2021-05-31	123.024
2021-05-28	123.023
2021-05-27	122.949
2021-05-26	123.094
2021-05-25	122.918
2021-05-24	122.76
2021-05-21	122.699
2021-05-20	122.585
2021-05-19	122.661
2021-05-18	122.711
2021-05-17	122.735
2021-05-14	122.773
2021-05-13	122.739
2021-05-12	122.832
2021-05-11	123.023
2021-05-10	123.319
2021-05-07	123.336
2021-05-06	123.382
2021-05-05	123.377
2021-05-04	123.406
2021-05-03	123.224
2021-04-30	123.188
2021-04-29	123.115
2021-04-28	123.283
2021-04-27	123.356
2021-04-26	123.371
2021-04-23	123.363
2021-04-22	123.386
2021-04-21	123.379
2021-04-20	123.341
2021-04-19	123.267
2021-04-16	123.361
2021-04-15	123.46
2021-04-14	123.283
2021-04-13	123.409
2021-04-12	123.444
2021-04-09	123.427
2021-04-08	123.61
2021-04-07	123.532
2021-04-06	123.506
2021-04-01	123.448
2021-03-31	123.166
2021-03-30	123.004
2021-03-29	123.198
2021-03-26	123.344
2021-03-25	123.461
2021-03-24	123.366
2021-03-23	123.3
2021-03-22	123.194
2021-03-19	123.111
2021-03-18	122.972
2021-03-17	123.092
2021-03-16	123.325
2021-03-15	123.347
2021-03-12	123.153
2021-03-11	123.279
2021-03-10	123.174
2021-03-09	123.162
2021-03-08	123.093
2021-03-05	123.167
2021-03-04	123.286
2021-03-03	123.23
2021-03-02	123.412
2021-03-01	123.359
2021-02-26	122.922
2021-02-25	122.908
2021-02-24	123.287
2021-02-23	123.376
2021-02-22	123.506
2021-02-19	123.381
2021-02-18	123.485
2021-02-17	123.611
2021-02-16	123.562
2021-02-15	123.663
2021-02-12	123.846
2021-02-11	123.99
2021-02-10	123.903
2021-02-09	123.913
2021-02-08	123.888
2021-02-05	123.873
2021-02-04	123.845
2021-02-03	123.886
2021-02-02	123.867
2021-02-01	123.904
2021-01-29	123.849
2021-01-28	123.925
2021-01-27	124.072
2021-01-26	124.07
2021-01-25	124.205
2021-01-22	124.027
2021-01-21	123.944
2021-01-20	124.106
2021-01-19	124.033
2021-01-18	124.002
2021-01-15	124.118
2021-01-14	124.21
2021-01-13	124.06
2021-01-12	123.86
2021-01-11	124.099
2021-01-08	124.222
2021-01-07	124.161
2021-01-06	124.129
2021-01-05	124.207
2021-01-04	124.228
2020-12-31	124.017
2020-12-30	124.012
2020-12-29	124.046
2020-12-24	123.785
2020-12-23	123.78
2020-12-22	124.036
2020-12-21	124.03
2020-12-18	124.042
2020-12-17	124.028
2020-12-16	123.963
2020-12-15	124.18
2020-12-14	124.245
2020-12-11	124.324
2020-12-10	124.17
2020-12-09	124.221
2020-12-08	124.225
2020-12-07	124.078
2020-12-04	123.867
2020-12-03	123.83
2020-12-02	123.646
2020-12-01	123.618
2020-11-30	123.829
2020-11-27	123.889
2020-11-26	123.902
2020-11-25	123.855
2020-11-24	123.823
2020-11-23	123.75
2020-11-20	123.748
2020-11-19	123.645
2020-11-18	123.602
2020-11-17	123.6
2020-11-16	123.503
2020-11-13	123.376
2020-11-12	123.33
2020-11-11	123.241
2020-11-10	123.105
2020-11-09	123.121
2020-11-06	123.153
2020-11-05	123.137
2020-11-04	122.919
2020-11-03	122.767
2020-11-02	122.681
2020-10-30	122.645
2020-10-29	122.744
2020-10-28	122.722
2020-10-27	122.862
2020-10-26	122.676
2020-10-23	122.686
2020-10-22	122.649
2020-10-21	122.798
2020-10-20	122.789
2020-10-19	122.86
2020-10-16	122.788
2020-10-15	122.714
2020-10-14	122.641
2020-10-13	122.568
2020-10-12	122.463
2020-10-09	122.381
2020-10-08	122.299
2020-10-07	122.119
2020-10-06	122.126
2020-10-05	122.011
2020-10-02	121.958
2020-10-01	121.911
2020-09-30	121.754
2020-09-29	121.795
2020-09-28	121.696
2020-09-25	121.67
2020-09-24	121.69
2020-09-23	121.793
2020-09-22	121.842
2020-09-21	122.035
2020-09-18	121.955
2020-09-17	121.984
2020-09-16	121.834
2020-09-15	121.839
2020-09-14	121.829
2020-09-11	121.803
2020-09-10	121.542
2020-09-09	121.706
2020-09-08	121.898
2020-09-07	121.799
2020-09-04	121.854
2020-09-03	121.99
2020-09-02	121.84
2020-09-01	121.503
2020-08-31	121.419
2020-08-28	121.444
2020-08-27	121.356
2020-08-26	121.414
2020-08-25	121.493
2020-08-24	121.812
2020-08-21	121.812
2020-08-20	121.763
2020-08-19	121.672
2020-08-18	121.582
2020-08-17	121.514
2020-08-14	121.367
2020-08-13	121.333
2020-08-12	121.478
2020-08-11	121.507
2020-08-10	121.58
2020-08-07	121.355
2020-08-06	121.41
2020-08-05	121.186
2020-08-04	121.32
2020-08-03	121.114
2020-07-31	121.212
2020-07-30	121.26
2020-07-29	121.129
2020-07-28	121.2
2020-07-27	121.062
2020-07-24	120.83
2020-07-23	121.013
2020-07-22	121.006
2020-07-21	120.76
2020-07-20	120.522
2020-07-17	120.325
2020-07-16	120.335
2020-07-15	120.096
2020-07-14	119.91
2020-07-13	119.711
2020-07-10	119.936
2020-07-09	119.915
2020-07-08	119.774
2020-07-07	119.734
2020-07-06	119.77
2020-07-03	119.652
2020-07-02	119.59
2020-07-01	119.209
2020-06-30	119.471
2020-06-29	119.454
2020-06-26	119.548
2020-06-25	119.549
2020-06-24	119.519
2020-06-23	119.459
2020-06-22	119.612
2020-06-19	119.583
2020-06-18	119.569
2020-06-17	119.71
2020-06-16	119.785
2020-06-15	119.246
2020-06-12	119.376
2020-06-11	119.307
2020-06-10	119.34
2020-06-09	119.483
2020-06-08	119.731
2020-06-05	119.303
2020-06-04	118.7
2020-06-03	118.288
2020-06-02	118.066
2020-06-01	117.77
2020-05-29	117.924
2020-05-28	117.762
2020-05-27	117.6
2020-05-26	117.184
2020-05-22	117.059
2020-05-21	117.058
2020-05-20	116.699
2020-05-19	116.481
2020-05-18	116.441
2020-05-15	116.591
2020-05-14	116.615
2020-05-13	116.898
2020-05-12	116.962
2020-05-11	117.097
2020-05-07	117.192
2020-05-06	117.126
2020-05-05	117.543
2020-05-04	117.409
2020-05-01	117.711

## Sheet: Veri
Date	GBI	CBI	VIXIE	VIX	EVZ	MOVE	OVX	GVZ	VSTOXX
2020-05-01	1035.15	117.711	87.07	37.19	802	48.11	110.18	24.25	38.32
2020-05-04	1033.03	117.409	91.68	35.97	835	49.25	97.42	23.68	38.32
2020-05-05	1034.72	117.543	89.39	33.61	821	49.65	97.27	24.97	34.51
2020-05-06	1031.41	117.126	89.6	34.12	823	51.31	115.39	24.47	34.81
2020-05-07	1032.48	117.192	88.69	31.44	823	54.93	110.62	26.15	32.43
2020-05-08	1032.35	117.192	88.69	27.98	817	57.4	98.7	24.89	29.66
2020-05-11	1031.7	117.097	83.16	27.57	787	61.6	109.72	23.55	29.91
2020-05-12	1031.06	116.962	80.6	33.04	844	61.26	86.86	22.45	27.67
2020-05-13	1030.91	116.898	81.69	35.28	728	57.56	82.83	22.71	33.42
2020-05-14	1029.61	116.615	84.86	32.61	846	59.05	80.05	24.15	36.32
2020-05-15	1029.55	116.591	82.97	31.89	842	56.53	76.39	23.63	34.47
2020-05-18	1027.93	116.441	73.5	29.3	696	58.7	76.14	22.81	29.06
2020-05-19	1027.8	116.481	67.59	30.53	718	60.09	73.22	21.33	30.17
2020-05-20	1029.65	116.699	61.91	27.99	725	58.85	73.62	20.12	29.11
2020-05-21	1032.6	117.058	62.52	29.53	707	55.62	89.06	19.74	32.31
2020-05-22	1032.27	117.059	63.19	28.16	682	51.67	84.98	18.95	31.42
2020-05-25	1032.28	117.059	63.19						29.16
2020-05-26	1032.83	117.184	57.88	28.01	679	52.22	75.47	18.57	28.04
2020-05-27	1035.73	117.6	54.9	27.62	688	52.98	73.89	18.51	29.4
2020-05-28	1037.26	117.762	54.95	28.59	730	50.57	72.98	18.1	29.01
2020-05-29	1038.99	117.924	57.72	27.51	672	51.55	69.23	18.15	31.13
2020-06-01	1038.06	117.77	57.11	28.23	690	55.07	64.38	18.06	30.1
2020-06-02	1040.15	118.066	53.08	26.84	685	55.35	64.71	18.1	30.68
2020-06-03	1041.3	118.288	50.2	25.66	745	61.24	65.73	18.47	29.61
2020-06-04	1043.62	118.7	50.34	25.81	742	61.18	65.13	18.05	27.66
2020-06-05	1049.49	119.303	45.8	24.52	730	61.97	64.2	18.17	27.89
2020-06-08	1054	119.731	49.78	25.81	740	62.77	67.24	17.94	28.12
2020-06-09	1052.62	119.483	56.28	27.57	785	62.94	67.76	19	29.75
2020-06-10	1052.19	119.34	58.96	27.57	832	60.02	63.06	20.75	30.05
2020-06-11	1053.25	119.307	65.25	40.79	898	56.47	69.96	23.04	36.02
2020-06-12	1054.2	119.376	64.12	36.09	904	55.81	70.22	20.39	41.41
2020-06-15	1053.29	119.246	66.93	34.4	861	58.09	68.11	20.11	38.41
2020-06-16	1056.63	119.785	56.47	33.67	875	60.49	66.63	19.29	36.1
2020-06-17	1056.71	119.71	57.37	33.47	838	58.16	61.45	18.88	35.36
2020-06-18	1055.8	119.569	61.82	32.94	829	55.15	61.35	18.31	35.05
2020-06-19	1056.22	119.583	60.77	35.12	797	53.4523	58.73	18.27	32.21
2020-06-22	1057.03	119.612	64.14	31.77	798	53.9318	56.76	19.55	33.78
2020-06-23	1055.51	119.459	57.27	31.37	803	54.04	58.83	20.51	31.34
2020-06-24	1056.14	119.519	65.1	33.84	828	54.89	64.96	20.01	36.81
2020-06-25	1056.86	119.549	66.96	32.22	795	51.57	62.69	19.73	34.68
2020-06-26	1057.05	119.548	67.08	34.73	761	51.21	63.69	20.52	35.17
2020-06-29	1056.27	119.454	65.53	31.78	773	52.96	60.04	19.26	34.49
2020-06-30	1056.35	119.471	58.92	30.43	774	54.13	57.66	19.65	31.72
2020-07-01	1052.37	119.209	57.12	28.62	727	53.28	53.43	18.85	30.13
2020-07-02	1055.75	119.59	53.95	27.68	668	50.96	51.29	17.7	27.59
2020-07-03	1056.26	119.652	53.74				51.29		28.27
2020-07-06	1056.9	119.77	48.68	27.94	692	52.03	50.73	17.42	27.6
2020-07-07	1056.2	119.734	49.94	29.43	697	50.98	51.39	17.37	27.93
2020-07-08	1056.99	119.774	50.37	28.08	692	49.8	48.85	17.74	29.57
2020-07-09	1058.37	119.915	47.12	29.26	703	50.07	53.77	17.39	30.45
2020-07-10	1058.79	119.936	47.56	27.29	671	49.19	49.71	16.64	28.43
2020-07-13	1056.59	119.711	44.53	32.19	688	49.55	53.41	16.53	27.14
2020-07-14	1058.14	119.91	46.14	29.52	704	50.81	53.04	16	28.93
2020-07-15	1059.73	120.096	44.75	27.76	713	47.08	47.05	15.36	27.57
2020-07-16	1061.83	120.335	45.95	28	638	46.43	46.12	15.37	26.81
2020-07-17	1061.52	120.325	46.57	25.68	675	45.68	40.22	15.09	25.58
2020-07-20	1062.93	120.522	42.83	24.46	678	46.82	42.59	15.3	24.21
2020-07-21	1064.56	120.76	40.08	24.84	688	46.45	41.1	16.67	23.49
2020-07-22	1067.12	121.006	40.74	24.32	682	45.32	41.3	22.45	24.21
2020-07-23	1067.17	121.013	40.34	26.08	721	43.93	43.83	21.99	23.31
2020-07-24	1065.47	120.83	40.87	25.84	739	42.48	42.35	21.61	25.58
2020-07-27	1067.75	121.062	42.09	24.74	859	42.61	41.37	25.52	25.24
2020-07-28	1069.04	121.2	43.94	25.44	838	41.27	41.09	28.96	24.4
2020-07-29	1068.59	121.129	42.75	24.1	841	41.63	39.58	26.79	24.23
2020-07-30	1070.03	121.26	44.66	24.76	880	40.66	42.06	24.13	28.02
2020-07-31	1070.01	121.212	43.62	24.46	856	41.98	44.43	24.46	26.66
2020-08-03	1068.96	121.114	41.3	24.28	859	43.13	41.56	23.56	25.76
2020-08-04	1070.56	121.32	39.31	23.76	845	44.11	40.28	26.3	25.09
2020-08-05	1069.93	121.186	38.25	22.99	880	41.75	37.12	25.69	23.94
2020-08-06	1071.91	121.41	37.43	22.65	852	42.6	37.59	27.36	24.94
2020-08-07	1071.41	121.355	35.76	22.21	801	41.46	37.43	26.22	24.2
2020-08-10	1073.31	121.58	35.96	22.13	766	42.21	35.74	23.89	24.11
2020-08-11	1072.27	121.507	33.93	24.03	784	45.26	37.5	27.48	23.39
2020-08-12	1071.89	121.478	31.66	22.28	797	44.23	34.74	25.85	22.47
2020-08-13	1070.51	121.333	33.41	22.13	802	45.08	34.87	25.82	22.69
2020-08-14	1071.08	121.367	34.69	22.05	776	43.09	35.1	23.53	23.87
2020-08-17	1072.5	121.514	35.06	21.35	784	45.81	32.43	26.35	22.78
2020-08-18	1073.06	121.582	36	21.51	859	46.06	31.7	26.46	23.27
2020-08-19	1073.74	121.672	36.74	22.54	851	44.6	32.85	28.15	21.99
2020-08-20	1074.73	121.763	38.34	22.72	832	44.58	32.83	25.91	24.04
2020-08-21	1075.26	121.812	37.8	22.54	800	45.14	33.68	25.96	24.34
2020-08-24	1075.1	121.812	35.99	22.37	820	46.33	32.25	23.86	23.11
2020-08-25	1072.03	121.493	37.02	22.03	804	47.89	33.03	22.76	23.36
2020-08-26	1071.43	121.414	36.95	23.27	799	47.99	33.79	24.79	22
2020-08-27	1070.86	121.356	35.89	24.47	764	49.29	33.74	23.08	23.56
2020-08-28	1072.04	121.444	35.36	22.96	807	48.19	32.06	23.19	25.16
2020-08-31	1071.33	121.419	35.36	26.41	826	47.02	32.59	24.32	26.72
2020-09-01	1072.52	121.503	33.74	26.12	825	44.3	31.74	23	27.12
2020-09-02	1075.71	121.84	31.62	26.57	805	44.86	35.49	23.57	26.61
2020-09-03	1076.96	121.99	33.99	33.6	827	45.76	41.28	23.68	29.01
2020-09-04	1075.85	121.854	36.39	30.75	767	47.04	44.02	21.98	31.71
2020-09-07	1075.63	121.799	35.77						27.92
2020-09-08	1076.63	121.898	37.28	31.46	811	50.68	55.9	22.49	28.45
2020-09-09	1075.14	121.706	34.73	28.81	777	48.82	49.42	21.66	25.89
2020-09-10	1073.4	121.542	33.37	29.71	813	45.21	52.16	21.26	25.01
2020-09-11	1076.08	121.803	37.07	26.87	772	43.12	50.13	20.2	23.72
2020-09-14	1076.24	121.829	35.69	25.85	739	44.21	49.41	20.91	22.57
2020-09-15	1076.37	121.839	34.95	25.59	772	43.06	45.19	20.32	22.12
2020-09-16	1076.27	121.834	34.86	26.04	743	42.43	41.13	20.08	21.99
2020-09-17	1077.59	121.984	36.57	26.46	735	38.45	38.73	19.95	22.55
2020-09-18	1077.18	121.955	37.34	25.83	721	37.24	39.07	20.22	22.65
2020-09-21	1078.08	122.035	47.86	27.78	779	38.63	42.89	21.6	29.88
2020-09-22	1076.8	121.842	48.95	26.86	773	39.35	41.28	21.63	28.11
2020-09-23	1076.27	121.793	47.99	28.58	776	38.63	44.64	23.43	27.17
2020-09-24	1076.17	121.69	55.49	28.51	787	37.22	42.88	23.41	28.34
2020-09-25	1076.27	121.67	55.38	26.38	760	36.97	41.41	22.09	27.81
2020-09-28	1076.31	121.696	51.53	26.19	786	37.4	40.64	22.01	26.82
2020-09-29	1077.08	121.795	52.08	26.27	796	36.62	46.13	23.28	26.9
2020-09-30	1076.56	121.754	50.2	26.37	765	39.21	44	22.07	26.06
2020-10-01	1076.83	121.911	49.25	26.7	778	38.65	49.35	22.39	26.54
2020-10-02	1077.17	121.958	48.79	27.63	758	39.97	55.51	22.59	26.82
2020-10-05	1077.34	122.011	46.54	27.96	796	39.81	49.44	22.13	26.28
2020-10-06	1077.92	122.126	42.01	29.48	787	57.75	46.6	22.79	25.21
2020-10-07	1077.98	122.119	40.56	28.06	803	56.98	45.5	23.28	24.97
2020-10-08	1079.63	122.299	39.93	26.36	766	57.31	41.15	21.96	23.98
2020-10-09	1080.54	122.381	38.85	25	756	57.52	42.38	22.44	22.24
2020-10-12	1081.06	122.463	37.58	25.07	763		44.04	22.66	22.25
2020-10-13	1082.11	122.568	39.19	26.07	743	55.59	46.07	23.17	22.94
2020-10-14	1082.9	122.641	41.51	26.4	737	53.5	43.53	21.88	23.24
2020-10-15	1083.89	122.714	48.18	26.97	748	55.62	43.83	21.73	26.84
2020-10-16	1084.6	122.788	42.58	27.41	682	57.25	44.06	20.29	25.32
2020-10-19	1085.27	122.86	43.03	29.18	753	61.16	43.35	21.33	26.62
2020-10-20	1084.56	122.789	44.16	29.35	787	60.42	43.85	21.54	27.63
2020-10-21	1084.4	122.798	44.09	28.65	812	59.07	47.58	22.66	29.45
2020-10-22	1083.05	122.649	45.61	28.11	831	59.73	46.61	21.38	28.99
2020-10-23	1083.34	122.686	45.41	27.55	792	58.46	46.32	21.04	28.16
2020-10-26	1083.19	122.676	50.1	32.46	825	58.95	53.05	20.93	31.76
2020-10-27	1085.19	122.862	52.34	33.35	877	57.88	50.22	20.41	32.74
2020-10-28	1084.46	122.722	65.97	40.28	923	57.13	59.61	21.93	38.26
2020-10-29	1084.87	122.744	64.51	37.59	887	61.3	63.38	21.9	37.55
2020-10-30	1083.98	122.645	63.42	38.02	859	61.91	68.84	23.26	35.35
2020-11-02	1084.2	122.681	59.94	37.13	879	63.56	66.73	23.74	35.23
2020-11-03	1084.38	122.767	54.96	35.55	891	64.37	63.63	23.32	32.76
2020-11-04	1085.56	122.919	47.59	29.57	707	47.74	54.53	20.49	28
2020-11-05	1086.66	123.137	40.5	27.58	741	43.76	53.69	22	26.37
2020-11-06	1086.91	123.153	38.48	24.86	745	39.88	55.75	21.1	25.62
2020-11-09	1085.64	123.121	37.11	25.75	724	44.94	52.2	21.86	23.86
2020-11-10	1085.89	123.105	38.18	24.8	687	46.19	49.64	20.46	25.08
2020-11-11	1087.16	123.241	38.03	23.45	688		49.24	19.14	23.13
2020-11-12	1088.44	123.33	40.17	25.35	746	44.17	50.9	18.98	23.3
2020-11-13	1088.91	123.376	40.38	23.1	664	42.95	48.24	17.74	23.14
2020-11-16	1089.53	123.503	37.77	22.45	665	42.49	46.89	18.31	22.38
2020-11-17	1090.61	123.6	37.34	22.71	679	43.08	45.08	17.54	22.25
2020-11-18	1090.48	123.602	36.72	23.84	655	43.62	46.06	17.67	20.9
2020-11-19	1090.83	123.645	38.59	23.11	636	43.53	46.34	17.96	21.97
2020-11-20	1091.84	123.748	38.71	23.7	610	42.31	43.94	17.72	21.44
2020-11-23	1091.77	123.75	37.33	22.66	638	43.04	42.79	18.98	22.49
2020-11-24	1091.92	123.823	33.73	21.64	638	42.38	42.84	20.09	21.37
2020-11-25	1092.18	123.855	34.46	21.25	668	39.62	43.56	19.75	20.78
2020-11-26	1092.61	123.902	34.54						20.23
2020-11-27	1092.57	123.889	33.62	20.84	668	39.64	46.21	19.09	20.08
2020-11-30	1091.86	123.829	34.46	20.57	667	40.84	47.37	19.69	22.91
2020-12-01	1089.99	123.618	31.4	20.77	717	41.53	47.81	19.61	21.3
2020-12-02	1090.03	123.646	31.49	21.17	742	43.92	45.68	19.42	21.69
2020-12-03	1091.6	123.83	30.88	21.28	762	42.53	40.95	19.61	21.32
2020-12-04	1091.67	123.867	32.14	20.79	768	43.89	38.34	18.95	20.82
2020-12-07	1093.43	124.078	35.24	21.3	801	49.67	37.68	19.79	21.44
2020-12-08	1094.71	124.225	36.68	20.68	747	49.1	37.7	19.86	20.54
2020-12-09	1094.53	124.221	33.93	22.27	763	48.48	39.52	20.26	20.02
2020-12-10	1094.01	124.17	37.31	22.52	732	47.15	39.7	19.66	20.66
2020-12-11	1095.41	124.324	41.65	23.31	762	47.52	39.51	19.24	23.61
2020-12-14	1094.61	124.245	38.35	24.72	774	49.22	39.96	19.43	22.52
2020-12-15	1093.93	124.18	37.32	22.89	772	48.14	39.34	19.75	21.73
2020-12-16	1092.04	123.963	35.08	22.5	728	46.96	38.68	19.39	21.14
2020-12-17	1092.25	124.028	33.89	21.93	730	44.15	36.86	20.1	20.51
2020-12-18	1092.39	124.042	37.3	21.57	677	44.64	37.15	19.58	21.63
2020-12-21	1092.29	124.03	50.02	25.16	763	46.66	41.56	19.8	27.26
2020-12-22	1092.42	124.036	48.45	24.23	738	43.57	42.06	19.5	25.21
2020-12-23	1090.12	123.78	44.12	23.31	735	42.74	39.89	18.87	23.15
2020-12-24	1089.97	123.785	39.93	21.53	690	42.11	39.41	18.99
2020-12-25	1089.97	123.785	39.93
2020-12-28	1090.71	123.785	39.93	21.7	697	45.26	39.67	20.2	21.71
2020-12-29	1092.33	124.046	37.86	23.08	725	46.1	38.64	19.53	22.38
2020-12-30	1091.74	124.012	37.76	22.77	757	47.19	38.01	20.06	23.37
2020-12-31	1091.63	124.017	38.48	22.75	729	48.98	37.83	20.79
2021-01-01	1090.97	124.017	38.48
2021-01-04	1093.04	124.228	36.52	26.97	743	49.59	42.12	21.86	24.84
2021-01-05	1092.8	124.207	38.89	25.34	735	48.95	40.39	22.14	25.2
2021-01-06	1091.99	124.129	37.25	25.07	699	44.64	39.31	21.7	21.44
2021-01-07	1092.12	124.161	36.16	22.37	700	45.2	36.06	20.66	21.02
2021-01-08	1092.59	124.222	35.2	21.56	691	44.81	36.65	22.16	20.53
2021-01-11	1091.59	124.099	37.68	24.08	693	47.77	35.31	20.65	21.98
2021-01-12	1089.69	123.86	38.44	23.33	677	50.12	33.85	20.01	21.95
2021-01-13	1091.63	124.06	34.95	22.21	684	45.6	36.79	18.8	21.09
2021-01-14	1093.19	124.21	34.78	23.25	638	46.23	37.95	19.21	19.69
2021-01-15	1092.25	124.118	36.67	24.34	652	45.14	40.39	19.04	22.43
2021-01-18	1091.47	124.002	37.71						21.95
2021-01-19	1091.62	124.033	35.5	23.24	669	45.23	35.37	18.87	21.75
2021-01-20	1092.11	124.106	32.98	21.58	623	42.53	35.67	18.95	20.28
2021-01-21	1090.51	123.944	33.11	21.32	657	43.01	35.05	18.85	19.94
2021-01-22	1091.51	124.027	32.92	21.91	628	43.09	36.25	18.42	21.32
2021-01-25	1093.17	124.205	34.82	23.19	648	43.08	38.02	18.51	26.01
2021-01-26	1092.15	124.07	33.64	23.02	613	43.14	37.13	17.88	23.1
2021-01-27	1092.59	124.072	36.78	37.21	642	44.16	40.21	18.47	26.77
2021-01-28	1091.62	123.925	38.54	30.21	622	45.53	40.45	19.38	25.93
2021-01-29	1090.6	123.849	38.27	33.09	630	47.41	40.2	20.64	29.01
2021-02-01	1091.08	123.904	37.37	30.24	653	46.28	39.16	21.81	27.33
2021-02-02	1090.57	123.867	34.72	25.56	645	45.91	38.62	19.61	24.02
2021-02-03	1090.66	123.886	33.5	22.91	656	46.93	37.11	18.45	22.72
2021-02-04	1090.22	123.845	30.95	21.77	647	47.25	35.37	19.3	21.37
2021-02-05	1090.38	123.873	30	20.87	619	47.2	34.94	18.7	20.64
2021-02-08	1090.6	123.888	29.72	21.24	618	48.45	34.48	18.45	20.44
2021-02-09	1090.91	123.913	30.68	21.63	622	46.75	33.54	18.35	21.12
2021-02-10	1090.83	123.903	28.67	21.99	622	46.27	33.77	18.57	22.47
2021-02-11	1091.79	123.99	27.7	21.25	622	45.95	34.33	18.31	21.21
2021-02-12	1090.35	123.846	27.59	19.97	622	47.01	34.25	18.08	20.06
2021-02-15	1088.61	123.663	27.2						20.15
2021-02-16	1087.55	123.562	28.49	21.46	631	56.78	35.13	19.57	20.93
2021-02-17	1088.2	123.611	29.7	21.5	657	55.97	36.9	20.49	21.83
2021-02-18	1087.02	123.485	29.95	22.49	621	56.12	37.9	19.66	22.52
2021-02-19	1086.17	123.381	28.58	22.05	593	60.43	37.76	19.26	20.48
2021-02-22	1087.27	123.506	30.34	23.45	632	62.42	38.57	19.12	21.69
2021-02-23	1086.18	123.376	32.17	23.11	676	61.73	39.75	18.3	23.13
2021-02-24	1085.51	123.287	31.06	21.34	635	61.92	39.58	18.31	21.43
2021-02-25	1081.95	122.908	33.95	28.89	755	74.16	40.58	21.26	22.1
2021-02-26	1082.3	122.922	38.32	27.95	723	75.66	42.49	21.08	26.86
2021-03-01	1086.21	123.359	33.31	23.35	669	68.73	42.56	21.33	22.16
2021-03-02	1086.86	123.412	31.66	24.1	662	57.7	40.96	20.06	21.81
2021-03-03	1084.95	123.23	32.1	26.67	655	65.83	39.83	20.93	21.7
2021-03-04	1085.91	123.286	32.25	28.57	709	68.13	37.27	21.61	22.09
2021-03-05	1085	123.167	34.92	24.66	679	69.37	36.61	20.21	25.08
2021-03-08	1084.27	123.093	33.68	25.47	722	71.65	38.89	20.64	20.9
2021-03-09	1084.69	123.162	32.29	24.03	691	67.44	37.97	19.54	20.26
2021-03-10	1084.99	123.174	30.09	22.56	689	63.19	37.56	18.55	19.67
2021-03-11	1085.7	123.279	27.96	21.91	649	63.9	37.86	18.21	18.88
2021-03-12	1084.55	123.153	29.03	20.69	663	70.83	37.51	18.36	18.71
2021-03-15	1086.28	123.347	30.03	20.03	668	70.79	39.38	17.86	18.62
2021-03-16	1086.14	123.325	28.81	19.79	683	70.81	39.1	17.93	17.55
2021-03-17	1084.21	123.092	30.41	19.23	653	66.75	37.4	17.24	17.57
2021-03-18	1083.24	122.972	29.17	21.58	657	70.48	48.44	17.79	17.46
2021-03-19	1084.6	123.111	29.42	20.95	633	68.8	44.38	16.57	18.4
2021-03-22	1085.3	123.194	30.39	18.88	630	67.62	40.28	16.47	17.68
2021-03-23	1086.08	123.3	28.86	20.3	621	60.77	48.62	16.69	17.6
2021-03-24	1086.56	123.366	28.59	21.2	638	60.71	64.91	15.7	17.77
2021-03-25	1087.39	123.461	29.62	19.81	650	59.54	49.88	15.58	18.88
2021-03-26	1086.69	123.344	28.6	18.86	611	61.49	44.93	15.48	17.11
2021-03-29	1085.4	123.198	29.15	20.74	634	65.96	44.16	17.23	18.35
2021-03-30	1083.49	123.004	28.83	19.61	640	67.44	41.46	18.3	18.47
2021-03-31	1084.55	123.166	26.52	19.4	640	71.27	45.65	17.07	17.97
2021-04-01	1085.52	123.448	24.5	17.33	572	64.99	40.15	16.74	16.9
2021-04-02	1085.52	123.448	24.5			63.71	40.15
2021-04-05	1085.52	123.448	24.5	17.91	572	61.79	42	17.08
2021-04-06	1086.02	123.506	26	18.12	644	60.29	42.41	16.76	17.11
2021-04-07	1085.98	123.532	25.83	17.16	645	62.54	41.27	16.11	16.66
2021-04-08	1086.88	123.61	25.48	16.95	645	60.08	40.7	15.72	16.16
2021-04-09	1084.55	123.427	25.94	16.69	645	61.21	39.19	15.3	16.18
2021-04-12	1084.93	123.444	25.37	16.91	545	63.5	37.04	14.88	17.05
2021-04-13	1085.14	123.409	26.53	16.65	561	61.2	35.2	14.26	16.31
2021-04-14	1083.78	123.283	24.58	16.99	540	60.08	35.7	14.69	16.19
2021-04-15	1085.41	123.46	23.18	16.57	567	59.05	34.2	15.36	15.71
2021-04-16	1084.44	123.361	23.34	16.25	561	62.57	32.79	15.32	16.11
2021-04-19	1083.52	123.267	26.93	17.29	602	63.96	35.07	16.01	17.21
2021-04-20	1084.43	123.341	28.7	18.68	618	64.35	35.68	15.59	21.08
2021-04-21	1084.7	123.379	28.24	17.5	608	62.27	42.44	16.41	19.28
2021-04-22	1084.84	123.386	28.27	18.71	595	59.62	39.39	16.05	17.76
2021-04-23	1084.6	123.363	27.51	17.33	567	59.98	38.7	15.74	18.19
2021-04-26	1084.84	123.371	26.77	17.64	587	60.98	41.23	15.51	18.28
2021-04-27	1084.64	123.356	27.02	17.56	572	60.15	38.44	14.77	19.21
2021-04-28	1083.91	123.283	26.25	17.28	562	60.31	36.42	14.79	18.38
2021-04-29	1082.5	123.115	25.67	17.61	550	59.02	36.37	14.54	18.88
2021-04-30	1083.3	123.188	25.09	18.61	578	58.13	38.39	14.58	20.63
2021-05-03	1083.75	123.224	25.09	18.31	592	57.33	40.15	15.65	19.93
2021-05-04	1085.4	123.406	26.81	19.48	606	58.51	37.15	15.91	22.82
2021-05-05	1085.28	123.377	26	19.15	599	56.93	38.33	15.7	19.9
2021-05-06	1085.41	123.382	27.06	18.39	606	57.75	37.74	16.57	20.38
2021-05-07	1085.15	123.336	25.92	16.69	646	54.13	37.63	16.46	18.38
2021-05-10	1084.82	123.319	25.86	19.66	646	55.48	37.99	17.19	18.5
2021-05-11	1082.47	123.023	27.65	21.84	646	58.01	37.93	17.17	22.56
2021-05-12	1080.79	122.832	29.35	27.59	656	58.47	36.94	17.56	23.94
2021-05-13	1079.97	122.739	29.73	23.13	623	56.59	37.94	17.1	23.35
2021-05-14	1080.25	122.773	31.32	18.81	623	54.99	36.46	16.75	19.55
2021-05-17	1080	122.735	30.84	19.72	595	58.59	36.42	17.62	21.81
2021-05-18	1079.75	122.711	31.17	21.34	635	57.18	37.01	17	21.31
2021-05-19	1079.52	122.661	31.68	22.18	646	57.31	38.82	17.79	24.48
2021-05-20	1078.72	122.585	31.46	20.67	613	55.04	39.43	17.29	22.1
2021-05-21	1079.82	122.699	31.35	20.15	598	54.59	39.34	16.47	20.35
2021-05-24	1080.34	122.76	30.65	18.4	605	54.94	35.54	16.91	19.24
2021-05-25	1081.55	122.918	27.66	18.84	636	53.72	36.23	17.09	19.08
2021-05-26	1083.22	123.094	27.24	17.36	610	52.82	33.89	16.81	18.28
2021-05-27	1081.88	122.949	26.17	16.74	616	53.47	33.63	16.15	17.82
2021-05-28	1082.69	123.023	24.94	16.76	612	52.04	33.54	16.08	17.17
2021-05-31	1082.56	123.024	24.94						19.1
2021-06-01	1082.65	123.041	23.83	17.9	613	54.99	33.43	16.09	18.77
2021-06-02	1083.78	123.166	25.63	17.48	601	55.21	32.77	15.65	17.85
2021-06-03	1083.54	123.132	25.82	18.04	631	53.96	33.89	15.95	18.24
2021-06-04	1084.75	123.276	24.92	16.42	631	49.78	31.76	15.83	17.38
2021-06-07	1084.5	123.238	25.77	16.42	579	49.55	31.7	15.57	17.71
2021-06-08	1085.31	123.351	24.9	17.07	577	49.93	31.95	15.59	17.72
2021-06-09	1086.68	123.509	21.71	17.89	559	52.84	31.79	15.43	17.23
2021-06-10	1086.81	123.513	20.79	16.1	559	48.26	33.03	15.5	16.66
2021-06-11	1087.87	123.647	19.59	15.65	559	50.85	32.55	15.21	15.15
2021-06-14	1087.4	123.606	19.49	16.39	526	54.03	33.13	16.13	16.05
2021-06-15	1086.67	123.523	20.32	17.02	526	52.92	31.56	16.26	16.41
2021-06-16	1087.04	123.564	20.23	18.15	553	54.28	33.83	16.3	16.18
2021-06-17	1086.3	123.472	20.46	17.75	537	54.91	36.84	17.66	17.08
2021-06-18	1086.35	123.499	20.41	20.7	576	60.45	33.95	17.9	20.76
2021-06-21	1084.81	123.319	21.48	17.89	585	61.86	35.01	16.91	19.48
2021-06-22	1084.12	123.26	21.61	16.66	561	58.64	34.28	16.66	17.57
2021-06-23	1084.95	123.346	20.28	16.32	565	55.6	34.68	16.2	18.55
2021-06-24	1085.11	123.378	19.76	15.97	551	54.83	32.05	15.7	17.35
2021-06-25	1083.93	123.236	19.63	15.62	536	55.58	31.3	15.29	16.68
2021-06-28	1085.24	123.392	20.34	15.76	563	56.33	31.86	15.36	17.65
2021-06-29	1084.93	123.35	20.83	16.02	565	56.8	31.99	16.19	16.95
2021-06-30	1086.29	123.511	21.31	15.83	602	57.27	32.74	15.97	18.18
2021-07-01	1085.06	123.504	21.62	15.48	600	57.52	32.47	15.8	17.73
2021-07-02	1086.4	123.662	21.24	15.07	600	52.41	32.87	15.28	16.57
2021-07-05	1085.42	123.567	20.49						16.75
2021-07-06	1087.89	123.854	21.97	16.44	600	56.55	37.59	15.45	18.13
2021-07-07	1089.29	123.996	22.05	16.2	600	60.65	42.01	15.21	17.32
2021-07-08	1090.06	124.073	25.73	19	600	61.68	38.8	15.82	19.97
2021-07-09	1088.96	123.945	23.66	16.18	600	59.92	37.02	15.27	17.95
2021-07-12	1089.31	124.003	23.07	16.17	529	60.78	38.73	15.04	17.95
2021-07-13	1089.69	124.035	23.13	17.12	534	60.8	35.4	14.84	18
2021-07-14	1090.45	124.118	22.18	16.33	549	57.31	38.2	14.79	17.68
2021-07-15	1090.82	124.173	23.15	17.01	552	56.98	38.04	15.01	18.64
2021-07-16	1091.83	124.264	23.66	18.45	516	58.24	37.15	14.6	19.45
2021-07-19	1093.13	124.42	27.82	22.5	559	67.58	46.36	15.96	25.44
2021-07-20	1094.36	124.537	28.48	19.73	610	69.31	52.26	15.01	24.49
2021-07-21	1093.56	124.469	26.77	17.91	550	65.28	42.91	15.01	21.52
2021-07-22	1094.92	124.588	24.75	17.69	505	64.96	36.44	14.51	19.91
2021-07-23	1094.96	124.591	23.76	17.2	624	65.28	34.05	14.53	17.55
2021-07-26	1095.07	124.617	24.17	17.58	549	69.03	35.59	15.2	18.53
2021-07-27	1096.39	124.743	25.11	19.36	568	70.07	35.14	15.51	21.36
2021-07-28	1097.19	124.824	24.72	18.31	562	62.4	34.62	15.61	19.48
2021-07-29	1097.04	124.834	23.14	17.7	522	62.08	33.36	15.21	19.26
2021-07-30	1097.34	124.895	23.37	18.24	516	61.19	32.85	15.09	20.94
2021-08-02	1098.5	124.974	22.91	19.46	547	64.29	36.23	15.23	19.84
2021-08-03	1098.67	125.02	23.77	18.04	547	65.42	37.55	15.09	20.22
2021-08-04	1098.96	125.042	23.74	17.97	554	62.67	42.27	14.88	19.21
2021-08-05	1099.36	125.127	23.11	17.28	554	63.57	39.09	14.84	18.25
2021-08-06	1097.31	124.886	22.62	16.15	518	62.64	39.31	15.9	17.89
2021-08-09	1097.09	124.87	22.66	16.72	518	65.72	43.28	17.26	17.55
2021-08-10	1097.09	124.878	22.55	16.79	518	66.55	39.28	16.93	17.28
2021-08-11	1096.97	124.855	21.5	16.06	518	60.66	38.32	15.85	17.04
2021-08-12	1096.89	124.847	20.92	15.59	518	57.39	36.5	15.67	16.11
2021-08-13	1096.82	124.854	20.74	15.45	518	55.45	35.91	15.15	15.8
2021-08-16	1097.27	124.889	21.46	16.12	546	59.4	38.84	15.62	18
2021-08-17	1097.15	124.881	22.39	17.91	581	60.28	39.5	16.1	18.39
2021-08-18	1097.6	124.932	22.7	21.57	549	58.05	40.86	15.8	18.47
2021-08-19	1097.69	124.926	25.18	21.67	536	59.38	40.98	15.91	22.13
2021-08-20	1097.87	124.948	24.81	18.56	542	59.95	40.67	15.34	20.15
2021-08-23	1097.26	124.887	22.88	17.15	540	62.23	38.67	15.84	17.89
2021-08-24	1096.79	124.849	22.65	17.22	532	63.03	36.79	15.45	18.09
2021-08-25	1094.7	124.601	22.54	16.79	537	64.51	35.6	15.9	17.83
2021-08-26	1094.11	124.565	23.02	18.84	535	63.41	36.33	16.44	19.09
2021-08-27	1094.19	124.564	22.03	16.39	527	57.98	34.93	15.27	17.6
2021-08-30	1094.96	124.564	22.03	16.19	534	60.14	35.27	15.52	17.5
2021-08-31	1092.84	124.408	21.53	16.48	556	59.54	34.28	15.47	18.77
2021-09-01	1092.41	124.348	20.97	16.11	537	58.09	36.13	15.12	17.47
2021-09-02	1093.26	124.43	20.86	16.41	520	55.8	31.35	14.76	16.97
2021-09-03	1092.25	124.327	22.47	16.41	507	53.26	36.91	14.95	18.19
2021-09-06	1092.4	124.35	22.17						17.56
2021-09-07	1090.08	124.106	22.89	18.14	527	57.05	32.91	15.36	18.6
2021-09-08	1090.08	124.114	21.75	17.96	533	57.02	31.91	15.14	20.49
2021-09-09	1091.94	124.297	21.16	18.8	511	52.61	33.87	15.1	19.64
2021-09-10	1090.81	124.192	20.68	20.95	511	51.73	33.54	15.15	20.36
2021-09-13	1090.96	124.199	21.35	19.37	516	53.1	32.74	15.09	20.74
2021-09-14	1091.2	124.249	21.66	19.46	512	51.73	33.63	15.02	20.46
2021-09-15	1090.34	124.171	21.27	18.18	493	53.93	32.38	15.14	21.69
2021-09-16	1090.11	124.138	20.63	18.69	517	53.7	33.16	15.92	21.65
2021-09-17	1089.02	124.023	21.28	20.81	507	56.06	32.32	15.92	23.17
2021-09-20	1090.17	124.154	28.19	25.71	544	59.58	35.23	16.85	26.47
2021-09-21	1090.82	124.204	26.69	24.36	526	59.2	34.45	16.46	25.51
2021-09-22	1090.62	124.182	24.73	20.87	503	55.92	32.43	16.41	22.81
2021-09-23	1087.24	123.864	22.67	18.63	484	56.79	32.3	16.82	20.62
2021-09-24	1086.51	123.757	24	17.75	482	58.46	34.01	16.44	21.85
2021-09-27	1086.35	123.721	24.31	18.76	493	60.5	34.98	16.2	20.83
2021-09-28	1085.28	123.61	26.88	23.25	523	62.71	36.1	16.78	24.89
2021-09-29	1085.94	123.709	26.69	22.56	563	61.21	35.26	17.39	23.96
2021-09-30	1085.56	123.614	27.89	23.14	540	61.07	38.68	17.16	23.24
2021-10-01	1085.81	123.73	28.56	21.15	504	57.38	37.38	16.32	24.04
2021-10-04	1085.57	123.71	29.44	22.96	543	60.61	37.27	16.77	25.19
2021-10-05	1084.3	123.559	29.32	21.3	528	62.83	37.2	16.56	22.23
2021-10-06	1083.74	123.496	34	21	550	60.65	41.02	16.58	24.33
2021-10-07	1084.21	123.534	30.15	19.54	543	60.91	46.15	16.29	21.02
2021-10-08	1082.37	123.354	30.4	18.77	519	59.65	38	15.67	20.28
2021-10-11	1080.53	123.155	33.39	20	575		38.51	15.56	20.18
2021-10-12	1078.09	122.913	33.11	19.85	536	62.95	37.1	15.1	20.74
2021-10-13	1079.31	123.039	31.57	18.64	499	60.84	36.05	15.51	19.84
2021-10-14	1081.55	123.303	27.98	16.86	471	59.35	36.98	15.34	16.99
2021-10-15	1081.68	123.301	26.67	16.3	503	62.7	34.05	15.06	16.35
2021-10-18	1078.78	123.071	27.74	16.31	509	70.77	35.02	15.53	17.13
2021-10-19	1077.52	122.912	26.03	15.7	509	68.25	35.14	15.32	16.29
2021-10-20	1078.44	123.021	25.45	15.49	501	65.47	35.16	15.27	15.98
2021-10-21	1076.64	122.833	25.04	15.01	493	69.42	36.55	15.15	16.75
2021-10-22	1076.23	122.826	23.96	15.43	490	72.04	36.87	15.74	16.4
2021-10-25	1078.12	122.996	24.25	15.24	520	68.96	36.07	16.73	16.28
2021-10-26	1078.08	123.007	22.34	15.98	508	66.7	35.5	15.96	16.15
2021-10-27	1079.9	123.189	22.13	16.98	512	70.06	37.63	16.08	16.92
2021-10-28	1078.53	123.045	23.84	16.53	525	71.96	37.23	15.8	17.61
2021-10-29	1074.27	122.671	25.86	16.26	549	75.45	37.92	16.07	17.62
2021-11-01	1075.46	122.735	26.27	16.41	557	78.34	36.74	16.31	17.5
2021-11-02	1079.9	123.212	26.11	16.03	550	71.04	35.56	16.47	16.86
2021-11-03	1080.05	123.193	25.52	15.1	544	71.22	39.44	16.28	16.47
2021-11-04	1083.66	123.591	23.41	15.44	514	64.61	38.56	15.87	15.97
2021-11-05	1085.98	123.861	21.58	16.48	519	66.9	37.84	16.64	16.4
2021-11-08	1085.27	123.755	21.45	17.22	537	70.97	37.71	16.66	17.2
2021-11-09	1086.94	123.927	22.59	17.78	559	73.02	36.33	16.76	18.06
2021-11-10	1084.48	123.687	22.36	18.73	598	78.31	37.09	16.8	17.18
2021-11-11	1083.01	123.519	22.97	17.66	603		36.2	16.95	17.09
2021-11-12	1084.36	123.62	22.8	16.29	604	78.61	36.1	16.85	16.14
2021-11-15	1082.47	123.431	22.99	16.49	661	81.59	36.42	17	16.65
2021-11-16	1081.25	123.316	22.83	16.37	723	81.58	34.69	16.67	16.8
2021-11-17	1079.12	123.106	23.58	17.11	698	81.58	33.75	16.69	16.68
2021-11-18	1081	123.297	23.72	17.59	694	74.51	37.68	16.25	17.77
2021-11-19	1084.07	123.632	24.48	17.91	713	73.39	37.13	15.99	19.12
2021-11-22	1082.23	123.43	25.04	19.17	720	79.21	36.61	16.59	18.88
2021-11-23	1079.04	123.092	27.91	19.38	717	80.57	35.1	16.81	20.64
2021-11-24	1077.27	122.891	29.93	18.58	691	83.15	34.79	16.75	20.67
2021-11-25	1077.44	122.905	31.17						19.88
2021-11-26	1078.09	122.862	41.32	28.62	750	89.45	65.72	17.99	32.31
2021-11-29	1077.19	122.803	41.92	22.96	708	89.41	63.34	17.55	28.8
2021-11-30	1078.2	122.919	43.29	27.19	751	84.04	75.23	17.99	30.07
2021-12-01	1078.05	123.012	41.24	31.12	724	82.97	78.18	18.39	26.02
2021-12-02	1081.06	123.34	42.51	27.95	710	82.55	57.27	18.45	30.47
2021-12-03	1081.78	123.405	42.29	30.67	700	79.14	64.55	17.92	31.48
2021-12-06	1082.79	123.544	41.4	27.18	701	87.89	56.21	17.44	30.04
2021-12-07	1082.97	123.62	35.01	21.89	671	88.14	48.15	17.02	24.87
2021-12-08	1080.65	123.344	33.94	19.9	662	80.29	45.22	16.48	24.71
2021-12-09	1082.96	123.582	30.72	21.58	657	79.54	47.43	16.7	23.52
2021-12-10	1082.84	123.564	31.13	18.69	676	74.36	46.23	15.35	22.43
2021-12-13	1084.2	123.718	28.12	20.31	588	76.41	45.88	15.97	23.02
2021-12-14	1083.77	123.621	28.93	21.89	661	78.98	54.76	16.41	24.42
2021-12-15	1083.3	123.574	28.42	19.29	585	74.06	56.53	15.54	24.74
2021-12-16	1082.59	123.55	26.19	20.57	570	69.1	49.97	15.22	20.61
2021-12-17	1084.36	123.708	27.77	21.57	559	72.46	48.31	15.07	21.98
2021-12-20	1084.95	123.74	31.37	22.87	566	77.02	60.24	15.77	26.83
2021-12-21	1081.87	123.406	28.81	21.01	554	79.52	52.31	15.42	22.83
2021-12-22	1081.3	123.328	28.34	18.63	544	76.85	46	14.94	21.04
2021-12-23	1078.82	123.11	26.12	17.96	552	77.29	43.71	14.62	19.04
2021-12-24	1078.95	123.114	25.57				43.71	14.62
2021-12-27	1078.66	123.042	25.57	17.68	559	80.12	43.58	15.44	19.66
2021-12-28	1078.27	123.03	25.57	17.54	572	77.52	41.23	15.06	19.07
2021-12-29	1076.56	122.844	26.54	16.95	562	78	40.24	15.13	20.18
2021-12-30	1075.95	122.784	25.27	17.33	555	77.62	40.2	14.77	19.27
2021-12-31	1075.86	122.789	24.94	17.22	529	77.1	42.62	14.61	19.27
2022-01-03	1072.99	122.548	24.94	16.6	579	84.08	37.57	15.34	19.17
2022-01-04	1073.53	122.629	24.46	16.91	564	83.11	39.48	15.33	18.64
2022-01-05	1073.83	122.643	25.38	19.73	545	78.68	44.49	16.21	17.76
2022-01-06	1072.71	122.443	28.81	19.61	570	77.73	36.86	15.87	20.1
2022-01-07	1070.47	122.332	29.32	18.76	533	74.69	37	15.04	20.62
2022-01-10	1070.43	122.275	31.85	19.4	566	78.12	37.65	15.56	22.54
2022-01-11	1070	122.161	30.28	18.41	574	77.85	34.31	15.21	19.79
2022-01-12	1070.26	122.298	27.08	17.62	553	74.55	34.39	15.32	18.3
2022-01-13	1070.84	122.38	27.94	20.31	564	72.57	37.11	15.17	18.46
2022-01-14	1068.68	122.1	30.56	19.19	557	76.59	41.18	14.73	21.4
2022-01-17	1066.95	121.912	31.68						20.04
2022-01-18	1066.4	121.845	33.82	22.79	606	84.63	42.28	15.09	21.96
2022-01-19	1066.05	121.809	33.07	23.85	579	80.14	42.75	15.64	22.36
2022-01-20	1067.19	121.952	33.45	25.59	587	80.96	41.15	15.09	20.4
2022-01-21	1069.03	122.115	37.06	28.85	592	81.03	42.57	15.2	24.22
2022-01-24	1069.86	122.209	42.04	29.9	621	83.77	47.84	16.3	32.68
2022-01-25	1068.78	122.059	40.85	31.16	610	84.57	47.63	16.47	31.45
2022-01-26	1068.23	122.012	37.65	31.96	607	85.75	45.67	16.42	28.34
2022-01-27	1066.41	121.828	40.26	30.49	629	85.62	46.9	17.15	28.03
2022-01-28	1064.51	121.598	44.52	27.66	648	85.29	47.74	17.12	29.41
2022-01-31	1060.39	121.206	43.09	24.83	669	85.14	42.35	16.7	27.01
2022-02-01	1060.01	121.078	39.79	21.96	658	85.22	41.31	16.5	24.09
2022-02-02	1058.84	121.069	39.01	22.09	625	84.85	41.86	15.66	22.64
2022-02-03	1053	120.216	44.41	24.35	696	85.74	42.15	16.01	24.33
2022-02-04	1042.5	119.297	53.62	23.22	681	87.68	43.88	15.53	26.3
2022-02-07	1037.69	118.774	55.26	22.86	720	87.44	43.34	16.15	24.24
2022-02-08	1038.19	118.772	49.34	21.44	696	82.72	41.26	15.86	23.16
2022-02-09	1040.95	119.208	44.9	19.96	687	81.76	39.4	15.63	21.41
2022-02-10	1037.6	118.837	48.29	23.91	715	88.52	43.81	15.92	21.84
2022-02-11	1036.25	118.694	50.47	27.36	809	94.03	47.44	17.81	24.66
2022-02-14	1035.79	118.574	52.71	28.33	807	102.28	48.83	18.95	30.05
2022-02-15	1033.93	118.383	47.5	25.7	759	94	48.36	17.7	27.06
2022-02-16	1036.18	118.621	47.01	24.29	745	92.74	49.38	18.07	26.61
2022-02-17	1038.36	118.829	49.33	28.11	757	96.17	53.14	19.79	28.79
2022-02-18	1039.79	118.979	51.59	27.75	758	94.36	52.01	18.54	31.27
2022-02-21	1037.96	118.746	55.75						36.22
2022-02-22	1032.18	118.223	53.94	28.81	759	95.54	50.11	17.93	32.98
2022-02-23	1033.4	118.267	53.53	31.02	744	95.15	50.51	17.69	33.46
2022-02-24	1031.06	118.001	62.52	30.32	810	100.75	49.04	18.12	38.13
2022-02-25	1030.64	117.969	49.47	27.59	772	93.34	49.5	18.4	32.12
2022-02-28	1033.52	118.213	56.02	30.15	917	100.4	52.5	20.97	35.29
2022-03-01	1046.13	119.483	65.6	33.32	1180	118.26	61.43	22.7	41.58
2022-03-02	1040.6	119.059	69.3	30.74	1036	110.28	61.53	21.85	38.78
2022-03-03	1041.33	118.913	72.57	30.48	1073	115.18	64.37	22.94	40.45
2022-03-04	1045.24	119.501	83.71	31.98	1300	131.82	77.29	26.29	49.64
2022-03-07	1036.27	118.501	99.96	36.45	1394	140.03	78.91	29.67	48.24
2022-03-08	1030.13	117.832	94.8	35.13	1243	133.37	75.82	31.7	45.56
2022-03-09	1026.3	117.549	79.9	32.45	1124	110.9	73.25	28.01	41.5
2022-03-10	1022.45	117.158	82.89	30.23	1131	105.31	67.34	26.08	43.35
2022-03-11	1021.48	117.04	78.51	30.75	1202	99.03	68.01	24.73	41.37
2022-03-14	1018.03	116.665	77.73	31.77	1186	105.08	65.42	24.08	40.64
2022-03-15	1020.64	116.952	77.76	29.83	1130	101.03	63.62	23.8	41.2
2022-03-16	1018.55	116.779	68.86	26.67	886	100.57	59.35	22.51	36.01
2022-03-17	1019.62	116.889	61.82	25.67	861	91.76	67.78	22.23	32.02
2022-03-18	1021.37	117.125	60.21	23.87	912	91.77	69.09	22	29.9
2022-03-21	1018.88	116.869	61.02	23.53	888	101.94	70.78	21.89	28.34
2022-03-22	1015.56	116.554	58.84	22.94	885	105.38	69.56	20.58	27.48
2022-03-23	1017.49	116.751	59.29	23.57	861	105.72	72.59	23.41	30.77
2022-03-24	1015.57	116.58	59.4	21.67	859	113.14	69.14	24.07	31.16
2022-03-25	1013.88	116.417	56.61	20.81	813	125.27	68.91	24.68	32.23
2022-03-28	1012.78	116.366	55.75	19.63	869	129.28	67.04	23.2	30.5
2022-03-29	1011.83	116.365	46.97	18.9	811	117.92	62.46	21.28	26.58
2022-03-30	1011.13	116.275	47.92	19.33	812	112.98	61.04	21.08	28.1
2022-03-31	1017.2	116.846	47.74	20.56	842	106.88	57.66	20.25	28.99
2022-04-01	1016.09	116.727	46.4	19.63	821	108.34	54.36	19.08	28.5
2022-04-04	1018.44	116.991	44.34	18.57	894	108.37	54.31	19.22	26.73
2022-04-05	1013.84	116.445	52.12	21.03	944	116.37	53.8	18.47	29.16
2022-04-06	1013.11	116.287	57.65	22.1	955	123.92	53.15	18.88	32.24
2022-04-07	1011.2	116.058	57.85	21.55	911	122.67	54.23	18.43	32.53
2022-04-08	1009.54	115.916	57.97	21.16	898	124.86	53.14	18.37	30.73
2022-04-11	1005	115.346	58.81	24.37	882	129.87	54.81	19.25	30.23
2022-04-12	1005.96	115.477	57.82	24.26	867	117.79	55.25	19.37	30.01
2022-04-13	1007.02	115.559	56.85	21.82	840	116.33	51.2	18.7	28.84
2022-04-14	1004.65	115.32	55.18	22.7	898	119.66	53.38	17.71	26.75
2022-04-15	1004.65	115.32	55.18						26.75
2022-04-18	1004.65	115.32	55.18	22.17	898	122.32	50.94	19.07
2022-04-19	1002.07	114.948	57.62	21.37	854	122.74	50.34	18.19	27.44
2022-04-20	1003.52	115.085	52.96	20.32	833	125.12	52.23	18.15	24.98
2022-04-21	999.225	114.612	50.53	22.68	879	130.69	49.86	18.22	24.54
2022-04-22	995.468	114.19	54.41	28.21	910	128.12	51.15	18.97	28.34
2022-04-25	999.606	114.547	59.36	27.02	895	131.63	52.86	19.47	31.46
2022-04-26	1000.54	114.658	63.48	33.52	947	129.27	53.57	19.23	32.71
2022-04-27	998.236	114.409	63.22	31.6	1032	130.11	53.38	19.16	32.74
2022-04-28	993.531	113.945	62.88	29.99	1156	128.74	51.94	19	31.28
2022-04-29	991.329	113.7	63.44	33.4	1051	128.4	53.1	19.83	30.77
2022-05-02	990.936	113.675	63.44	32.34	1121	135.17	54.15	20.06	34.07
2022-05-03	989.485	113.625	62.58	29.25	1082	126.46	54.04	19.71	31.38
2022-05-04	986.592	113.324	65.52	25.42	976	121.99	53.15	18.81	31.23
2022-05-05	985.182	113.169	66.03	31.2	1101	122.72	54.72	19.36	32.77
2022-05-06	976.885	112.247	72.35	30.19	1082	121.42	54.82	18.71	32.8
2022-05-09	976.759	112.219	75.74	34.75	1119	125.22	57.9	20.49	35.91
2022-05-10	981.551	112.649	72.18	32.99	1026	126.76	56.06	20.02	35.01
2022-05-11	979.765	112.715	66.15	32.56	961	118.05	53.43	20.26	31.12
2022-05-12	986.755	113.296	67.36	31.77	1125	118.73	52.71	21.51	32.4
2022-05-13	983.74	113.127	63.05	28.87	1063	114.61	51.22	21.2	29.11
2022-05-16	985.661	113.223	63.85	27.47	989	117.95	51.89	21.16	28.22
2022-05-17	980.833	112.785	59.29	26.1	957	119.46	50.34	20.05	26.24
2022-05-18	981.276	112.831	62.68	30.96	1006	114.86	51.89	19.69	27.63
2022-05-19	981.518	112.807	69.56	29.35	965	115.05	51.16	20.25	29.47
2022-05-20	982.151	112.893	65.13	29.43	939	111.1	50.72	19.31	28.66
2022-05-23	978.866	112.575	63.47	28.48	929	110.19	48.63	19.63	27.58
2022-05-24	981.588	112.778	64.29	29.45	917	111.15	47.04	19.13	28.61
2022-05-25	981.753	112.765	58.23	28.37	935	105.69	46.76	18.27	27.42
2022-05-26	980.459	112.697	51.78	27.5	912	102.49	46.03	17.81	25.66
2022-05-27	982.172	112.933	49.3	25.72	864	98.48	47.92	17.5	23.85
2022-05-30	979.65	112.697	47.15	26.54					23.73
2022-05-31	975.922	112.312	51.19	26.19	858	107.12	49.82	17.19	25.25
2022-06-01	973.995	112.094	52.67	25.69	878	109.38	49.14	16.94	25.44
2022-06-02	971.068	112.094	52.67	24.72	860	99.27	47.8	17.13	23.39
2022-06-03	968.833	112.094	52.67	24.79	839	97.73	46.23	16.51	23.39
2022-06-06	966.576	111.366	52.69	25.07	877	102.26	47.9	16.81	22.97
2022-06-07	968.683	111.549	54.27	24.02	867	102.61	45.88	16.64	23.59
2022-06-08	965.269	111.213	50.68	23.96	870	105.29	44.37	16.04	23.13
2022-06-09	958.861	110.525	54.94	26.09	862	105.29	43.87	16.29	23.97
2022-06-10	952.01	109.73	60.87	27.75	919	114.23	42.92	17.58	27.66
2022-06-13	938.489	108.28	71.42	34.02	1132	139.21	47.56	20.84	31.81
2022-06-14	931.819	107.561	74.89	32.69	1138	144.09	46.63	21.99	31.57
2022-06-15	936.446	108.077	73.26	29.62	1027	135.93	47.04	19.4	30.07
2022-06-16	929.755	107.43	81.99	32.95	1086	138.1	46.27	20.65	32.59
2022-06-17	930.558	107.514	81.12	31.13	1053	133.75	49.19	20.28	30.89
2022-06-20	928.229	107.266	76.62	31.03					28.59
2022-06-21	928.334	107.264	73.25	30.19	957	138.91	46.56	18.24	28.11
2022-06-22	933.918	107.831	77.4	28.95	953	129.94	48.99	18.29	28.68
2022-06-23	943.946	108.829	79.92	29.05	944	125.98	48.58	18.65	29.21
2022-06-24	942.945	108.773	75.11	27.23	880	127	46.99	17.92	27.77
2022-06-27	938.571	108.302	73.7	26.95	894	133.22	46.99	17.88	27.02
2022-06-28	933.003	107.768	78.81	28.36	916	135.22	46.59	17.95	26.68
2022-06-29	937.155	108.182	83.27	28.16	968	130.43	48.57	18.08	28.11
2022-06-30	940.946	108.51	87.93	28.71	970	135.5	48.9	19.61	29.78
2022-07-01	948.848	109.418	87.21	26.7	1016	144.17	49.4	20.17	28.76
2022-07-04	943.044	108.778	86.47	27.53				20.17	28.32
2022-07-05	951.651	109.723	91.78	27.54	1151	156.16	52.61	21.33	31.6
2022-07-06	954.725	110.09	88.37	26.73	1184	151.14	54.67	21.91	30.11
2022-07-07	950.726	109.759	82.33	26.08	1146	149.71	52.87	20.5	28.32
2022-07-08	952.064	109.979	78.34	24.64	1116	145.25	52.1	19.41	27.55
2022-07-11	957.619	110.562	79.12	26.17	1268	147.72	53.1	19.72	28.87
2022-07-12	963.104	111.106	79.2	27.29	1252	148.11	54.4	19.78	29.26
2022-07-13	959.623	110.753	79.82	26.82	1270	136.1	51.76	18.36	29.85
2022-07-14	957.31	110.479	84.36	26.4	1370	137.76	53.03	19.6	31.82
2022-07-15	960.683	110.786	80.35	24.23	1284	129.85	51.77	19.27	28.82
2022-07-18	957.541	110.482	80.13	25.3	1292	127.69	49.66	19.42	29.06
2022-07-19	954.816	110.16	75.03	24.5	1258	124.7	48.77	18.63	26.72
2022-07-20	957.652	110.685	71.34	23.88	1248	122.9	47.54	19.26	27.4
2022-07-21	960.128	110.936	70.73	23.11	1204	121.15	51.1	18.71	25.55
2022-07-22	972.121	112.151	67.16	23.03	1183	123.7	47.84	18.3	24.06
2022-07-25	974.746	112.489	68.65	23.36	1159	128.27	47.96	18.3	24.53
2022-07-26	977.718	112.75	77.22	24.69	1166	128.55	47.81	18.06	25.57
2022-07-27	977.631	112.682	77.84	23.24	1092	117.28	48.99	17.39	24.04
2022-07-28	986.078	113.564	72.01	22.33	1102	119.93	47.17	16.84	22.55
2022-07-29	986.065	113.608	66.65	21.33	1061	116.36	46.19	16.49	22.3
2022-08-01	988.833	113.911	68.29	22.84	1050	120.5	49.97	17.52	22.96
2022-08-02	987.585	113.759	72.25	23.93	1068	129.23	52.77	17.34	23.77
2022-08-03	983.055	113.308	68.99	21.95	1076	122.04	50.12	16.76	22.34
2022-08-04	986.897	113.681	68.47	21.44	1028	120.57	55.14	16.95	22.45
2022-08-05	979.769	112.97	69.39	21.15	987	122.58	48.76	16.37	22.85
2022-08-08	982.753	113.234	66.55	21.29	982	124.12	46.4	16.76	22.08
2022-08-09	980.801	113.026	71.09	21.77	973	125.12	46.23	16.69	23.28
2022-08-10	983.51	113.324	62.12	19.74	906	115.26	46.56	16.27	21.79
2022-08-11	980.475	113.041	58.28	20.2	901	111.11	45.37	15.81	21.65
2022-08-12	979.71	112.97	57.05	19.53	903	106.28	44	15.22	21.21
2022-08-15	984.717	113.493	57.22	19.95	1021	113.82	46.63	15.37	21.59
2022-08-16	981.021	113.079	61.1	19.69	1029	116.83	50.25	15.27	21.34
2022-08-17	972.943	112.208	66.17	19.9	1047	117.7	51.55	15.32	22.75
2022-08-18	971.649	112.001	65.44	19.56	1102	120.26	47.41	15.36	22.67
2022-08-19	964.405	111.178	70.47	20.6	1129	123.81	50.34	15.91	24.58
2022-08-22	958.651	110.569	81.15	23.8	1206	135.89	50.64	16.57	27.37
2022-08-23	957.373	110.393	81.62	24.11	1162	133.85	47.35	15.8	26.92
2022-08-24	955.267	110.181	79.61	22.82	1151	133.13	48.33	15.9	25.45
2022-08-25	958.542	110.526	76.61	21.78	1129	126.33	48.78	15.57	24.72
2022-08-26	954.494	110.105	82.22	25.56	1110	122.95	47.08	15.42	26.66
2022-08-29	949.06	110.105	82.22	26.21	1154	130.14	47.73	16.02	28.46
2022-08-30	945.504	109.154	89.23	26.21	1139	127.69	49.74	16.52	28.37
2022-08-31	941.607	108.748	90.69	25.87	1120	124.84	52.11	17.02	27.95
2022-09-01	939.131	108.427	88.44	25.56	1172	126.58	53.9	17.8	29.15
2022-09-02	944.014	108.991	79.04	25.47	1152	120.72	53.9	16.88	25.5
2022-09-05	940.773	108.611	85.13	25.99					27.79
2022-09-06	939.78	108.55	83.05	26.91	1183	133.54	50	17.68	27.35
2022-09-07	940.394	108.71	80.12	24.64	1157	133.12	53.32	16.77	27.13
2022-09-08	935.138	108.115	79.3	23.61	1099	124.14	51.29	16.4	25.92
2022-09-09	937.965	108.427	75.06	22.79	1068	121.54	48.84	15.91	24.88
2022-09-12	941.922	108.854	71.47	23.87	1085	123.07	44.15	15.79	24.62
2022-09-13	936.336	108.319	76.57	27.27	1148	128.87	44.81	16.93	26.04
2022-09-14	936.531	108.296	74.82	26.16	1104	125.35	45.62	17.17	26.24
2022-09-15	933.913	108.034	74.34	26.27	1103	124.07	46.63	19.66	25.35
2022-09-16	930.718	107.66	78.86	26.3	1086	124.95	47.44	18.31	26.43
2022-09-19	929.897	107.66	78.86	25.76	1108	133.79	46.75	18.37	26.19
2022-09-20	923.264	106.886	83.37	27.16	1131	134.66	48.23	18.59	27.16
2022-09-21	923.471	106.855	87.18	27.99	1067	130.54	48.65	18.48	27.27
2022-09-22	919.184	106.387	89.01	27.35	1072	131.93	47.1	17.93	28
2022-09-23	914.131	106.092	92.58	29.92	1274	137.28	50.82	19.42	30
2022-09-26	911.575	105.689	97.76	32.26	1409	153.61	56.68	20.26	30.75
2022-09-27	906.945	105.155	100.43	32.6	1421	158.12	55.89	19.26	31.32
2022-09-28	907.25	105.095	99.5	30.18	1424	158.99	55.02	19.27	31.34
2022-09-29	904.457	104.82	102.16	31.84	1454	148.14	54.41	19.78	33.07
2022-09-30	907.83	105.158	98.37	31.62	1424	141.89	55.69	19.52	30.71
2022-10-03	916.093	106.053	96.51	30.1	1380	152.94	56.24	20.29	30.71
2022-10-04	918.883	106.51	87.8	29.07	1312	151.21	59.51	19.55	29.27
2022-10-05	913.649	105.847	91.2	28.55	1353	152.01	54.2	19.69	29.86
2022-10-06	909.653	105.48	90.59	30.52	1390	153.29	53.39	19.67	29.17
2022-10-07	905.384	105.015	96.31	31.36	1377	148.46	53.64	19.66	29.92
2022-10-10	900.72	104.492	100.05	32.45	1413		51.42	20.54	31.87
2022-10-11	902.508	104.605	101.06	33.63	1393	155.57	51.92	20.59	32.01
2022-10-12	899.791	104.29	98.23	33.57	1393	160.72	51.52	20.4	31.82
2022-10-13	897.895	104.07	96.29	31.94	1319	155.08	50.52	20.07	30.2
2022-10-14	898.295	104.068	94.1	32.02	1308	152.89	50.3	20.07	29.77
2022-10-17	900.139	104.287	90.21	31.37	1322	150.42	50.27	19.96	29.27
2022-10-18	902.099	104.511	88.33	30.5	1264	145.79	49.12	19.19	28.92
2022-10-19	897.372	104.003	89.36	30.76	1270	147.73	47.78	19.41	28.3
2022-10-20	894.802	103.826	88.84	29.98	1264	155.61	47.98	19.23	27.75
2022-10-21	894.309	103.726	88.53	29.69	1288	156.95	47.19	19.05	27.83
2022-10-24	898.068	104.102	86.24	29.85	1288	154.02	47.78	19.58	28.68
2022-10-25	903.817	104.756	81.11	28.46	1265	147.78	47.3	19.33	27.62
2022-10-26	905.673	105.023	78.38	27.28	1167	140.2	48.58	18.67	26.95
2022-10-27	912.409	105.743	78.48	27.39	1170	142.78	49.02	18.51	25.87
2022-10-28	908.217	105.382	76.45	25.75	1189	144.6	47.81	18.01	24.89
2022-10-31	907.564	105.251	79.16	25.88	1237	147.92	47.41	18.27	24.83
2022-11-01	908.626	105.546	76.27	25.81	1216	148.42	47.04	18.45	24.47
2022-11-02	908.006	105.478	75.7	25.86	1187	141.17	47.75	17.84	24.7
2022-11-03	903.179	104.949	77.41	25.3	1199	136.28	46.47	18.03	23.77
2022-11-04	902.584	104.969	72.25	24.55	1192	128.44	47.5	18.03	22.91
2022-11-07	903.065	104.969	69.3	24.35	1188	128.33	45.11	18.12	22.66
2022-11-08	905.314	105.172	67.72	25.54	1185	126.33	45.04	18.91	22.61
2022-11-09	909.948	105.571	66.75	26.09	1195	124.4	45.38	18.91	23.24
2022-11-10	919.34	106.624	58.43	23.53	1169	111.69	43.48	17.69	21.32
2022-11-11	915.863	106.275	53.75	22.52	1213		42.06	17.57	20.78
2022-11-14	917.291	106.408	54.07	23.73	1222	119.99	44.42	17.41	20.94
2022-11-15	920.807	106.74	51.95	24.54	1223	128.62	46.72	17.72	20.86
2022-11-16	925.073	107.115	54.27	24.11	1229	130.83	45.12	17.23	21.17
2022-11-17	924.087	107.001	57.14	23.93	1241	132.18	45.34	16.77	21.82
2022-11-18	926.078	107.219	53.38	23.12	1188	129.33	45.93	16.51	20.88
2022-11-21	927.895	107.371	54.08	22.36	1222	132.13	47.11	16.68	21.17
2022-11-22	929.517	107.493	51.68	21.29	1168	133.53	46.3	16.07	20.22
2022-11-23	931.872	107.737	48.15	20.35	1200	136.2	51.56	15.84	19.51
2022-11-24	936.833	108.234	45.27	20.42					19.56
2022-11-25	932.118	107.774	47.36	20.5	1181	129.6	50.16	15.23	19.93
2022-11-28	932.552	107.816	52.73	22.21	1187	131.73	50.53	15.77	21.52
2022-11-29	936.959	108.252	52.54	21.89	1183	131.23	47.91	15.71	21.7
2022-11-30	935.323	108.104	53.2	20.58	1139	127.27	46.15	15.45	21.21
2022-12-01	943.304	108.981	49.32	19.84	1265	119.77	45.61	15.92	20.32
2022-12-02	942.096	108.825	49.91	19.06	1148	118.62	45.76	15.42	19.33
2022-12-05	942.597	108.957	51.59	20.75	1141	126.5	45.41	15.81	19.82
2022-12-06	946.266	109.346	54.2	22.17	1126	129.09	46.36	16.19	20.81
2022-12-07	947.217	109.45	55.28	22.68	1118	131.1	47.91	16.55	22.03
2022-12-08	945.93	109.328	56.15	22.29	1075	129.54	47.17	16.45	21.79
2022-12-09	939.685	108.781	53.37	22.83	1030	132.79	46.93	16.26	21.4
2022-12-12	939.065	108.731	54.96	25	992	141.93	44.99	15.51	22.54
2022-12-13	942.34	109.057	50.86	22.55	894	135.08	43.37	14.71	20.39
2022-12-14	942.364	109.059	49.57	21.14	796	120.26	41.82	14.06	20.34
2022-12-15	933.503	108.152	53.9	22.83	846	111.26	43.7	14.39	20.84
2022-12-16	928.212	107.637	64.71	22.62	818	113.65	42.29	14.14	21.32
2022-12-19	928.062	107.601	67.32	22.42	822	118.32	42.47	14.49	20.6
2022-12-20	923.783	107.148	69.23	21.48	830	119.92	41.79	15.03	20.69
2022-12-21	923.692	107.136	63.09	20.07	816	115	41.18	14.78	19.06
2022-12-22	921.991	106.973	60.78	21.97	844	112.05	41.8	14.88	19.96
2022-12-23	919.582	106.752	58.35	20.87	843	113.17	41.21	14.86	20.04
2022-12-26	919.582	106.752	58.35
2022-12-27	916.124	106.752	58.35	21.65	897	124.89	43.5	16.3	20.66
2022-12-28	916.505	106.398	58.19	22.14	907	120.07	43.95	15.99	20.51
2022-12-29	918.518	106.582	57.97	21.44	930	120.25	42.6	16.18	19.93
2022-12-30	915.058	106.239	56.49	21.67	947	121.61	41.26	16.25	20.89
2023-01-02	919.941	106.239	56.49						20.77
2023-01-03	921.424	106.879	55.2	22.9	967	129.97	44.14	17.26	20.28
2023-01-04	927.263	107.422	51.41	22.01	968	125.78	45.83	17.35	19.45
2023-01-05	925.885	107.215	52.96	22.46	976	119.53	43.93	16.78	19.53
2023-01-06	930.962	107.737	48.77	21.13	956	113.87	42.94	16.44	18.49
2023-01-09	930.825	107.717	46.34	21.97	973	116.67	42.75	16.92	19
2023-01-10	927.707	107.425	48.91	20.58	963	119.52	41.6	16.59	19.25
2023-01-11	932.631	107.925	45.59	21.09	953	115.17	41.19	16.32	19.34
2023-01-12	936.354	108.313	44.42	18.83	917	112.34	39.28	15.95	17.94
2023-01-13	937.55	108.483	44.12	18.35	879	113.55	38.19	16.37	17.34
2023-01-16	938.324	108.55	45.52	19.49					18.35
2023-01-17	943.255	109.051	44.35	19.36	915	122.27	40.1	16.49	18.62
2023-01-18	947.084	109.462	42.97	20.34	899	112.61	39.25	16.19	18.12
2023-01-19	943.892	109.15	46.97	20.52	888	114.53	39.02	16.71	20.3
2023-01-20	940.004	108.744	47.12	19.85	859	114.76	37.81	16.4	18.68
2023-01-23	939.514	108.699	44.57	19.81	901	114.69	37.3	16.2	18.16
2023-01-24	941.784	108.912	44.5	19.2	881	112.76	38.26	16.17	18.06
2023-01-25	942.786	109.021	45.57	19.08	881	107.74	38.54	16.12	18.42
2023-01-26	941.17	108.863	43.65	18.73	880	104.28	38.12	15.59	18.17
2023-01-27	940.386	108.799	42.99	18.51	860	100.7	38.6	15.23	17.29
2023-01-30	936.848	108.457	44.97	19.94	913	103.77	40.18	15.59	18.75
2023-01-31	937.884	108.575	45.04	19.4	909	99.54	38.55	15.75	18.57
2023-02-01	937.211	108.582	44.18	17.87	870	97.33	37.99	15.22	18.7
2023-02-02	952.742	110.155	38.73	18.73	866	97.76	38.49	15.14	16.67
2023-02-03	946.917	109.653	37.76	18.33	863	98.99	39.48	15.06	16.76
2023-02-06	942.719	109.266	41.23	19.43	900	105.63	38.92	15.81	18.64
2023-02-07	941.981	109.196	40.92	18.66	933	103.15	37.31	15.62	18.76
2023-02-08	939.372	108.881	40	19.63	884	100.75	37.02	15.46	18.72
2023-02-09	941.579	109.1	38.91	20.71	905	102.45	35.75	15.52	18.17
2023-02-10	937.73	108.682	43.72	20.53	915	109.63	35.89	15.46	20.47
2023-02-13	936.82	108.563	43.95	20.34	959	110.67	37.77	15.58	19.79
2023-02-14	933.969	108.257	42.47	18.91	864	110.59	36.67	14.88	18.9
2023-02-15	932.677	108.095	42.17	18.23	850	108.64	35.7	14.9	17.62
2023-02-16	932.089	108.014	41.93	20.17	827	111.01	35.03	14.92	18.05
2023-02-17	932.943	108.093	45.04	20.02	844	110.11	36.04	14.69	19.23
2023-02-20	932.63	108.063	44.89	21.23					19.53
2023-02-21	928.359	107.599	48.51	22.87	851	119.62	37.05	15.48	20.89
2023-02-22	929.448	107.645	48.05	22.29	849	118.21	38.36	15.05	21.18
2023-02-23	930.878	107.81	46.34	21.14	848	117.45	36.69	14.84	20.24
2023-02-24	927.213	107.432	47.16	21.67	849	122.84	37.25	14.56	21.67
2023-02-27	926.091	107.278	45.74	20.95	845	120.03	37.55	14.35	19.96
2023-02-28	922.973	106.944	45.99	20.7	824	123.6	35.42	14.17	19.5
2023-03-01	919.133	106.556	45.96	20.58	851	121.08	36.63	14.16	20.11
2023-03-02	918.322	106.47	46.86	19.59	850	124.12	35.61	13.94	19.67
2023-03-03	917.95	106.434	43.49	18.49	835	122.52	35.2	13.93	18.12
2023-03-06	917.909	106.445	41.07	18.61	837	128.19	33.03	14.24	17.87
2023-03-07	918.888	106.531	41.37	19.59	861	133.33	33.76	14.2	18.43
2023-03-08	920.123	106.681	39.86	19.11	868	129.76	33.39	13.79	18.06
2023-03-09	920.74	106.71	40.73	22.61	902	129.28	34.86	14.3	18.02
2023-03-10	927.81	107.386	47.06	24.8	926	140.06	36.76	16.57	21.17
2023-03-13	935.418	107.97	65.28	26.52	933	173.59	38.13	20	25.86
2023-03-14	923.549	106.839	68.68	23.73	856	169.65	47.41	17.95	22.76
2023-03-15	936.357	107.941	83.94	26.14	979	198.71	49.78	19.75	32.02
2023-03-16	930.524	107.229	99.33	22.99	937	167.96	48.65	17.38	26.65
2023-03-17	935.733	107.759	101.36	25.51	949	180.11	51.48	22.83	30.04
2023-03-20	932.894	107.486	87	24.15	959	182.64	51.14	21.4	28.43
2023-03-21	929.75	107.553	69.93	21.38	912	162.31	48.12	19.14	24.11
2023-03-22	928.615	107.546	65.87	22.26	949	142.84	46.97	19.22	22.25
2023-03-23	935.814	108.2	69.16	22.61	930	151.4	46.9	20.95	21.57
2023-03-24	937.428	108.244	78.35	21.74	962	173.66	48.36	19.96	24.88
2023-03-27	933.833	107.885	72.62	20.6	941	161.67	45.41	19.18	23.06
2023-03-28	929.89	107.528	71.81	19.97	931	155.96	44.31	19.03	22.09
2023-03-29	929.618	107.554	64.89	19.12	892	150.58	43.33	17.77	20.4
2023-03-30	927.751	107.535	60.93	19.02	955	141.24	42.02	18.39	19.78
2023-03-31	931.106	107.947	57.01	18.7	910	135.93	40.34	17.31	19.42
2023-04-03	935.452	108.439	56.95	18.55	858	138.17	39.49	18.25	19.09
2023-04-04	936.119	108.481	56.51	19	865	147.75	39.42	19.73	19.02
2023-04-05	940.137	108.86	58.73	19.08	877	153.9	39.14	18.98	19.93
2023-04-06	940.484	108.812	57.44	18.4	871	147.73	34.76	18.44	19.12
2023-04-07	940.484	108.812	57.44			139.2			19.12
2023-04-10	940.484	108.812	57.44	18.97	871	143	34.31	18.54
2023-04-11	935.202	108.244	53.02	19.1	837	139.78	34.23	18.33	18.82
2023-04-12	932.807	108.002	50.45	19.09	809	129.68	33.74	17.69	18.63
2023-04-13	933.653	108.112	49.09	17.8	798	119.95	32.78	18.48	17.64
2023-04-14	931.671	107.939	46.86	17.07	771	118.84	32.51	17.16	16.44
2023-04-17	930.726	107.883	47.2	16.95	775	122.69	32.93	17.37	17.46
2023-04-18	932.612	108.139	45.63	16.83	776	122.78	33.69	17.14	16.9
2023-04-19	930.308	107.88	46.72	16.46	797	124.02	34.44	17.21	16.93
2023-04-20	932.687	108.091	49.38	17.17	833	120.61	36.41	17.21	17.73
2023-04-21	931.647	107.944	48.74	16.77	791	120.84	35.17	16.42	17.08
2023-04-24	931.746	107.96	48.05	16.89	780	126.28	34.28	16.88	17.16
2023-04-25	936.272	108.457	49.81	18.76	815	137.13	36.64	17.72	17.93
2023-04-26	936.028	108.329	51.67	18.84	866	130.39	39.25	17.74	18.78
2023-04-27	933.526	108.056	48.89	17.03	838	122.43	37.76	17.28	18.18
2023-04-28	939.742	108.726	47.2	15.78	804	122.46	35.63	16.47	17.43
2023-05-01	938.128	108.731	47.2	16.08	838	128.18	35.94	16.63
2023-05-02	940.867	109.015	51.37	17.78	852	137.55	39.48	18.69	20.57
2023-05-03	940.331	108.913	52.76	18.34	854	134.5	43.23	18.7	19.94
2023-05-04	943.844	109.193	56.41	20.09	853	140.71	43.75	20.35	20.83
2023-05-05	939.849	108.827	53.06	17.19	800	130.21	37.35	18.5	18.28
2023-05-08	938.794	108.688	53.06	16.98	800	135.07	35.54	18.67	18.07
2023-05-09	937.823	108.622	53.93	17.71	798	133.93	35.13	18.73	18.92
2023-05-10	939.908	108.835	50.73	16.94	798	125.6	34.13	18.37	18.67
2023-05-11	942.564	109.098	49.14	16.93	798	128.21	35.74	17.77	18.56
2023-05-12	940.575	108.941	46.82	17.03	798	120.52	37.32	17.37	17.01
2023-05-15	938.555	108.775	47.95	17.12	777	127.89	35.16	17.52	17.17
2023-05-16	934.968	108.449	48.21	17.99	718	130.3	35.98	17.62	16.88
2023-05-17	933.62	108.277	47.66	16.87	747	120.78	36.44	16.99	16.95
2023-05-18	929.289	107.925	44.07	16.05	732	122.5	36.02	16.95	15.66
2023-05-19	930.906	108.101	41.88	16.81	732	127.51	35.85	17.22	15.72
2023-05-22	930.009	108.02	42.21	17.21	754	132.29	35.52	17.55	16.31
2023-05-23	929.992	108.024	42.65	18.53	791	131.7	35.11	17.66	17.67
2023-05-24	930.116	108.012	47.17	20.03	779	132.29	35.86	17.56	20.93
2023-05-25	928.615	107.848	45.49	19.14	774	139.54	36.74	16.84	19.86
2023-05-26	925.968	107.641	43.06	17.95	753	145.37	35.95	16.3	17.6
2023-05-29	931.016	108.056	43.06	17.46					17.87
2023-05-30	935.586	108.562	43.2	17.46	754	141.36	39.68	15.88	17.96
2023-05-31	938.863	108.899	45.96	17.94	767	136.02	40.68	15.63	19.98
2023-06-01	940.12	108.98	42.39	15.65	720	124.63	40.5	15.5	17.55
2023-06-02	937.598	108.736	39.01	14.6	691	120.95	39.6	14.32	16.03
2023-06-05	934.857	108.472	39.93	14.73	706	119.08	37.45	14.27	16.12
2023-06-06	935.608	108.532	38.71	13.96	706	114.42	36.07	13.94	15.4
2023-06-07	933.086	108.312	37.93	13.94	686	120.5	34.13	13.81	15.33
2023-06-08	934.815	108.479	37.87	13.65	702	115.11	35.18	13.94	15.1
2023-06-09	936.883	108.683	37.64	13.83	702	115.77	33.7	13.69	14.99
2023-06-12	937.566	108.79	37.42	15.01	672	119.8	36.35	13.7	15.18
2023-06-13	935.496	108.579	37.73	14.61	643	118.8	32.38	13.45	14.78
2023-06-14	934.64	108.484	35.3	13.88	607	114.37	33.66	12.84	14.23
2023-06-15	930.908	108.104	36.44	14.5	696	107.34	33.07	13	13.72
2023-06-16	933.707	108.315	33.65	13.54	597	104.43	32.99	12.4	13.07
2023-06-19	931.56	108.125	34.37	14.19					14.22
2023-06-20	936.542	108.588	35.14	13.88	627	114.19	34.75	12.73	14.65
2023-06-21	935.062	108.423	35.06	13.2	613	110.84	33.26	12.98	14.4
2023-06-22	931.278	108.058	35.64	12.91	600	107.7	34.93	12.96	14.86
2023-06-23	937.615	108.653	36.51	13.44	602	105.74	35.36	12.73	15.35
2023-06-26	939.36	108.816	38.61	14.25	664	109.02	36.67	13.08	15.88
2023-06-27	935.748	108.48	37.36	13.74	659	110.85	39.3	12.88	15.2
2023-06-28	937.914	108.693	35.73	13.43	672	108.3	36.86	12.53	14.21
2023-06-29	933.878	108.341	34.89	13.54	666	113.45	35.42	12.21	14.25
2023-06-30	934.046	108.403	31.71	13.59	664	110.64	33.28	12.04	13.61
2023-07-03	932.946	108.334	32.02	13.57	674	110.77	33.88	12.22	13.65
2023-07-04	933.611	108.44	32.23	13.7					14.1
2023-07-05	933.716	108.472	33.79	14.18	770	110.53	33.91	12.46	15.29
2023-07-06	926.81	107.826	39.23	15.44	697	134.63	35.13	12.25	19.23
2023-07-07	928.145	107.921	37.88	14.83	658	130.41	34.55	12.12	17.54
2023-07-10	928.351	107.903	36.28	15.07	667	131.73	38.35	12.41	17.5
2023-07-11	928.418	107.919	33.25	14.84	667	127.07	32.43	12.64	16.57
2023-07-12	933.467	108.496	30.1	13.54	676	114.07	32.69	13.12	15.18
2023-07-13	938.411	108.95	31.45	13.61	676	111.75	30.04	12.73	15.05
2023-07-14	938.128	108.907	32.9	13.34	676	112.48	30	12.05	14.8
2023-07-17	939.05	108.956	34.84	13.48	703	113.5	31.34	12.34	15.83
2023-07-18	944.644	109.502	32.66	13.3	709	112.45	30.66	12.62	15.51
2023-07-19	943.384	109.406	32.81	13.76	693	107.19	31.06	12.89	15.97
2023-07-20	940.278	109.104	35.1	13.99	719	112.85	30.15	12.67	15.69
2023-07-21	941.976	109.259	33.06	13.6	693	106.66	29.65	12.23	14.94
2023-07-24	944.314	109.481	34.03	13.91	738	109.95	30.11	12.35	15.53
2023-07-25	943.728	109.416	34.02	13.86	729	113.02	30.63	12.42	15.48
2023-07-26	941.232	109.166	33.86	13.19	710	104.88	29.97	12.11	16.1
2023-07-27	942.978	109.331	31.23	14.41	733	111.15	29.12	12.29	14.97
2023-07-28	943.952	109.437	30.14	13.33	712	109.76	29.41	11.78	15.22
2023-07-31	944.939	109.544	32.52	13.63	732	112.03	28.48	12.16	16.23
2023-08-01	941.373	109.325	34.9	13.93	710	116.38	28.35	11.83	17.19
2023-08-02	942.822	109.454	39.01	16.09	727	115.15	28.74	12.45	19.71
2023-08-03	941.124	109.296	40.74	15.92	739	124.6	28.54	12.79	19.65
2023-08-04	941.198	109.305	37.85	17.1	691	115.91	28.06	12.22	18.35
2023-08-07	941.281	109.337	39.33	15.77	709	120.94	27.73	12.24	18.62
2023-08-08	945.993	109.768	42.19	15.99	687	118.74	27.14	12.21	19.54
2023-08-09	944.479	109.634	38.81	15.96	687	112.55	28.56	12.33	18.98
2023-08-10	942.75	109.473	35.96	15.85	687	108.64	27.27	11.84	18.08
2023-08-11	938.813	109.1	37.24	14.84	687	112.13	28.04	11.54	18.37
2023-08-14	938.409	109.016	37.68	14.82	718	119.94	27.55	11.97	18.05
2023-08-15	936.103	108.809	39.4	16.46	705	121.8	28.3	12.11	18.86
2023-08-16	937.521	108.916	41.18	16.78	708	117.24	28.54	12.43	18.55
2023-08-17	935.233	108.707	43.77	17.89	721	121.14	29.3	12.89	20.35
2023-08-18	937.831	108.955	46.83	17.3	730	120.51	28.43	12.63	20.25
2023-08-21	934.265	108.608	46.61	17.13	717	130.69	28.9	12.91	19.84
2023-08-22	936.158	108.788	45.41	16.97	735	126.65	28.56	12.58	19.13
2023-08-23	942.422	109.391	41.41	15.98	733	118.4	28.47	12.67	18.5
2023-08-24	942.484	109.417	40.75	17.2	768	117.56	28.88	12.53	18.9
2023-08-25	939.972	109.172	40.24	15.68	734	110.37	28.81	12.09	18.47
2023-08-28	939.599	109.081	40.24	15.08	744	110.45	28.66	12.21	17.82
2023-08-29	941.929	109.344	36.34	14.45	707	110.68	27.63	12.5	16.78
2023-08-30	940.924	109.293	35.22	13.88	691	109.84	26.63	12.39	16.56
2023-08-31	944.909	109.717	35.71	13.57	730	107.93	26.56	11.78	16.06
2023-09-01	942.673	109.509	34.97	13.09	718	102.92	27.48	11.28	15.94
2023-09-04	940.532	109.325	34.48	13.82					16.66
2023-09-05	939.659	109.23	35.07	14.01	758	109.64	28.65	11.36	16.35
2023-09-06	936.436	108.945	37.85	14.45	760	111.31	28.33	11.31	16.8
2023-09-07	938.045	109.098	37.38	14.4	760	105.2	27.59	11.11	16.99
2023-09-08	939.773	109.274	36.07	13.84	730	104.34	27.16	10.99	16.19
2023-09-11	938.875	109.225	35.33	13.8	718	107.23	24.37	10.75	16.23
2023-09-12	938.899	109.233	36.46	14.23	719	105.11	24.23	10.82	16.52
2023-09-13	937.764	109.097	33.64	13.48	736	101.86	25.06	10.33	16.5
2023-09-14	941.546	109.452	31.6	12.82	665	97.11	26.56	10.22	14.75
2023-09-15	939.537	109.282	32.2	13.79	692	96.61	27.16	10.34	14.73
2023-09-18	937.653	109.098	32.87	14	675	99.32	27.91	11.1	16.15
2023-09-19	936.945	109.037	32.87	14.11	692	101.31	30.32	11.09	16.35
2023-09-20	938.705	109.193	32.79	15.14	680	97.04	30.38	10.96	15.41
2023-09-21	937.642	109.09	36.7	17.54	725	106	31.35	11.11	17.12
2023-09-22	937.576	109.062	37.22	17.2	681	101.11	30.61	10.87	16.96
2023-09-25	936.257	108.956	38.26	16.9	708	117.33	30.96	11.43	19.08
2023-09-26	935.016	108.818	41.43	18.94	725	117.72	31.3	13.63	19.77
2023-09-27	933.438	108.65	43.44	18.22	760	122.09	32.48	13.86	19.51
2023-09-28	926.732	108.032	42.4	17.34	746	115.24	31.62	13.09	18.82
2023-09-29	934.844	108.787	41.14	17.52	730	113.55	32.24	12.94	17.47
2023-10-02	931.834	108.527	44.72	17.61	797	127.59	32	14.13	18.92
2023-10-03	930.105	108.362	50.71	19.78	817	141.67	33.25	15.31	20.2
2023-10-04	928.642	108.153	52.39	18.58	804	128.23	35.35	14.58	20.22
2023-10-05	930.809	108.432	54.19	18.49	779	130.18	36.59	14.7	19.66
2023-10-06	929.454	108.34	50.96	17.45	769	126.64	35.68	14.03	18.65
2023-10-09	934.28	108.803	53.79	17.7	783		39.85	15.18	20.24
2023-10-10	934.244	108.834	45.78	17.03	782	136.17	39.54	14.49	18.61
2023-10-11	935.793	108.998	45.32	16.09	753	127.18	38.94	14.38	17.77
2023-10-12	934.105	108.838	43.62	16.69	753	126.37	38.52	13.98	17.16
2023-10-13	935.63	108.963	48.28	19.32	780	128.33	44.24	18.91	20.18
2023-10-16	934.284	108.81	47.89	17.21	752	130.16	40.7	16.22	19.92
2023-10-17	930.487	108.399	48.76	17.88	747	130.17	41.37	16.59	19.87
2023-10-18	928.217	108.231	51.18	19.22	796	129.17	44.4	17.38	21.64
2023-10-19	927.477	108.114	52.75	21.4	780	134.62	45.7	19.4	22.3
2023-10-20	930.39	108.379	56.28	21.71	808	135.45	43.79	18.56	23.33
2023-10-23	930.195	108.386	53.68	20.37	778	131.83	41.74	17.28	21.94
2023-10-24	933.235	108.712	49.8	18.97	761	128.13	41.08	16.05	20.99
2023-10-25	931.867	108.598	51.48	20.19	757	131.21	44.91	16.76	20.58
2023-10-26	933.651	108.764	54.53	20.68	722	130.94	43.93	16.53	21.5
2023-10-27	935.187	108.916	53.44	21.27	716	129.16	46.64	17.69	20.79
2023-10-30	936.572	109.083	51.73	19.75	735	131.9	44.01	16.84	20.95
2023-10-31	938.375	109.254	48.5	18.14	725	126.86	41.99	16.23	19.71
2023-11-01	940.149	109.519	45.46	16.87	670	120.55	40.52	15.36	18.65
2023-11-02	943.285	109.847	39.78	15.66	715	118.64	39.79	14.76	17.73
2023-11-03	946.181	110.101	37.58	14.91	697	118.74	38.53	14.04	16.84
2023-11-06	943.399	109.814	37.85	14.89	697	121.74	36.31	13.25	16.83
2023-11-07	945.268	109.976	37.74	14.81	697	120.09	38.72	13.33	16.68
2023-11-08	946.712	110.09	32.95	14.45	697	117.1	40.44	14.07	16.05
2023-11-09	946.682	110.116	32.33	15.29	680	117.05	41.23	14.06	15.77
2023-11-10	944.273	109.882	32.79	14.17	680	116.79	39.29	13.96	16.04
2023-11-13	944.209	109.912	30.46	14.76	685	124.47	39.4	13.92	15.87
2023-11-14	950.695	110.618	27.37	14.16	710	124.11	38.29	13.73	15.03
2023-11-15	950.933	110.63	28.41	14.18	665	122.19	39.51	12.98	14.81
2023-11-16	953.245	110.865	29.71	14.32	656	116.08	42.53	13.04	14.68
2023-11-17	952.24	110.769	28.41	13.8	667	113.11	40.43	12.97	13.85
2023-11-20	950.656	110.603	27.27	13.41	664	115.09	39	12.59	14.01
2023-11-21	953.148	110.83	27.77	13.35	693	112.79	38.52	14.09	14.06
2023-11-22	952.78	110.791	27.42	12.85	690	111.57	42.76	13.35	13.48
2023-11-23	950.5	110.597	27.42	12.8					13.64
2023-11-24	949.414	110.516	27.7	12.46	670	107.43	43.38	13.05	13.4
2023-11-27	954.59	110.992	29.97	12.69	661	109.31	43.9	13.31	14.03
2023-11-28	957.736	111.294	30.1	12.69	694	110.06	43.14	15.54	14.17
2023-11-29	962.515	111.799	27.77	12.98	693	114.59	42.9	15.04	14.2
2023-11-30	961.614	111.738	29.91	12.92	708	115.32	39.4	14.22	13.81
2023-12-01	967.541	112.343	29.21	12.63	709	111.51	35.7	16.96	13.5
2023-12-04	968.76	112.523	29.74	13.08	742	118.25	38.08	17.13	14.12
2023-12-05	972.668	112.935	30.67	12.85	758	127.2	36.36	15.46	14
2023-12-06	974.111	113.092	30.92	12.97	809	124.98	39.72	15.4	14.08
2023-12-07	974.684	113.155	30.63	13.06	758	129.74	37.82	14.93	14.21
2023-12-08	971.034	112.774	30.84	12.35	713	121.65	36.24	14.14	13.7
2023-12-11	971.183	112.781	30.41	12.63	767	126.66	35.3	13.99	13.71
2023-12-12	972.483	112.885	28.86	12.07	670	118.62	36.38	12.82	13.2
2023-12-13	975.46	113.193	25.52	12.19	666	113.77	36.6	13.67	13.5
2023-12-14	981.792	113.899	23.78	12.48	685	118.04	33.98	13.96	12.45
2023-12-15	986.599	114.337	26.65	12.28	718	115.75	35.13	13.49	12.12
2023-12-18	984.44	114.138	28.7	12.56	643	118.46	37.09	13.79	12.91
2023-12-19	986.705	114.362	26.51	12.53	621	115.03	35.04	13.75	12.83
2023-12-20	989.066	114.595	26.95	13.67	618	111.87	34.98	13.82	12.74
2023-12-21	990.557	114.728	27.06	13.65	674	111.93	35.44	14.27	13.59
2023-12-22	991.314	114.805	26.17	13.03	649	111.38	33.32	15.25	13.56
2023-12-25	991.314	114.805	26.17
2023-12-26	991.314	114.805	26.17	12.99	688	116	34.53	15.83
2023-12-27	993.818	115.075	26.86	12.43	694	114.53	35.41	16.96	13.43
2023-12-28	993.34	115.054	26.87	12.47	716	113.78	36.45	16.05	13.52
2023-12-29	990.137	114.728	26.06	12.45	733	114.62	36.22	15.85	13.57
2024-01-01	990.137	114.728	26.06
2024-01-02	988.473	114.546	31.26	13.2	763	127.02	39.05	15.73	14.49
2024-01-03	987.534	114.354	36.58	14.04	731	124.57	38.22	14.85	15.49
2024-01-04	983.051	113.927	34.63	14.13	709	121.12	37.58	14.2	14.31
2024-01-05	981.973	113.771	33.81	13.35	682	116.19	36.07	13.81	14.12
2024-01-08	981.726	113.793	31.6	13.08	690	117.72	36.79	13.56	14
2024-01-09	979.595	113.605	30.04	12.76	678	114.92	36.09	13.16	13.7
2024-01-10	978.841	113.54	24.14	12.69	687	109.63	36.35	13.26	13.39
2024-01-11	979.798	113.698	25.45	12.44	687	103.45	36.78	12.8	13.92
2024-01-12	983.604	114.081	24.78	12.7	687	106.51	40.64	13.49	13.42
2024-01-15	981.79	113.897	24.78	13.25					14.11
2024-01-16	980.68	113.788	27.5	13.84	698	113.44	38.34	13.55	14.15
2024-01-17	976.373	113.333	30.53	14.79	690	105.86	37.06	13.53	15.08
2024-01-18	976.686	113.41	28.89	14.13	690	107.22	35.98	13.09	14.51
2024-01-19	976.933	113.466	26.79	13.3	658	104.97	35.79	12.95	14.17
2024-01-22	979.755	113.763	26.25	13.19	643	106.87	35.71	12.83	13.85
2024-01-23	978.253	113.617	28.44	12.55	680	107.7	34.99	12.73	13.58
2024-01-24	978.702	113.68	26.56	13.14	688	105.78	33.99	12.7	13.46
2024-01-25	982.339	114.104	26.07	13.45	717	105.89	35.1	12.79	13.58
2024-01-26	982.576	114.142	25.2	13.26	702	100.23	34.78	11.91	13.61
2024-01-29	985.131	114.509	26.9	13.6	739	106.34	36.32	13.08	14.06
2024-01-30	984.411	114.324	26.73	13.31	745	104.26	36.19	13.05	14.11
2024-01-31	990.293	114.86	29.57	14.35	726	107.28	37.25	13.16	14.82
2024-02-01	989.847	114.888	31.37	13.88	730	113.92	35.38	13.72	14.81
2024-02-02	983.776	114.304	28.36	13.85	697	106.72	34.85	12.66	14.04
2024-02-05	980.074	113.923	29.88	13.67	682	108.68	34.43	12.49	14.16
2024-02-06	981.494	114.062	29.51	13.06	687	110.6	33.01	12.31	13.61
2024-02-07	981.743	114.042	30.83	12.83	687	107.86	31.21	11.84	13.64
2024-02-08	979.029	113.766	30.19	12.79	687	108.6	31.64	11.71	13.76
2024-02-09	977.434	113.608	28.64	12.93	687	106.21	32.44	11.2	13.99
2024-02-12	978.719	113.744	27.44	13.93	628	109.78	32.69	11.81	14.36
2024-02-13	976.891	113.572	28.47	15.85	621	113.22	32.37	12.15	15.03
2024-02-14	979.316	113.817	26.7	14.38	627	111.97	32.76	12.02	14.44
2024-02-15	979.952	113.913	25.79	14.01	612	112.09	32.02	11.79	14.32
2024-02-16	977.65	113.679	25.08	14.24	595	109.2	30.84	11.75	13.79
2024-02-19	978.284	113.737	25.08	14.71					14.08
2024-02-20	980.34	113.963	27.43	15.42	637	111.02	31.81	11.81	14.2
2024-02-21	977.672	113.7	26.74	15.34	596	114.27	31.05	11.46	14.55
2024-02-22	978.092	113.789	24.43	14.54	605	115.59	30.55	11.19	13.81
2024-02-23	981.435	114.096	24.95	13.75	568	108.31	31.31	11.5	13.7
2024-02-26	979.171	113.876	26.21	13.74	663	110.77	31.71	11.29	13.44
2024-02-27	977.906	113.766	26.86	13.43	624	110.8	31.35	10.95	13.36
2024-02-28	976.782	113.639	27	13.84	663	108.71	31.21	10.93	13.86
2024-02-29	978.326	113.814	26.42	13.4	622	109.1	31.5	11.16	13.78
2024-03-01	979.533	113.924	25.99	13.11	643	106.48	31.08	13.47	13.78
2024-03-04	979.635	113.936	24.86	13.49	650	109.57	30.47	14.61	13.75
2024-03-05	983.285	114.293	25.78	14.46	650	110.33	30.19	14.54	14.69
2024-03-06	982.31	114.195	24.44	14.5	650	105.33	29.57	15.17	14.16
2024-03-07	984.149	114.441	23.61	14.44	689	105.45	29.57	15.09	13.9
2024-03-08	987.513	114.796	23.07	14.74	645	100.88	29.64	15.47	13.72
2024-03-11	986.515	114.686	24.08	15.22	604	106.63	29.11	15.5	14.73
2024-03-12	985.654	114.654	23.4	13.84	552	101.36	29.36	14.1	13.68
2024-03-13	985.305	114.678	21.96	13.75	579	97.03	29.52	14.09	13.14
2024-03-14	983.158	114.463	23.94	14.4	647	98.67	31.51	13.3	13.32
2024-03-15	982.18	114.336	26.39	14.41	540	97.82	29.77	13.54	13.31
2024-03-18	981.956	114.309	26.04	14.33	542	102.87	29.81	13.83	13.44
2024-03-19	983.275	114.422	25.72	13.82	554	99.99	29.22	13.48	13.12
2024-03-20	983.011	114.37	26.53	13.04	498	92.72	28.82	13.62	12.96
2024-03-21	985.493	114.632	23.99	12.92	535	90.82	27.53	13.42	12.18
2024-03-22	988.574	114.95	27.95	13.06	613	91.04	26.92	12.53	12.42
2024-03-25	986.302	114.702	25.99	13.19	536	92.24	27.49	12.09	12.49
2024-03-26	987.274	114.79	25.63	13.24	529	90.63	27.25	12.57	12.45
2024-03-27	990.248	115.107	25.33	12.78	597	86.28	26.6	13.58	12.86
2024-03-28	990.796	115.2	24.21	13.01	556	86.38	26.27	15.44	13.38
2024-03-29	990.796	115.2	24.21						13.38
2024-04-01	990.796	115.207	24.21	13.65	609	94.2	27.65	16.25
2024-04-02	987.946	114.906	26.8	14.61	630	96.57	29.04	17.13	15.18
2024-04-03	988.935	114.969	25.79	14.33	649	97.88	29.08	17.49	14.25
2024-04-04	990.67	115.263	24.98	16.35	622	96.13	32.17	17.29	13.69
2024-04-05	988.856	115.057	26.99	16.03	653	94.31	32.36	16.92	16.12
2024-04-08	987.457	114.931	27.07	15.19	653	99.37	30.57	18.17	15.52
2024-04-09	990.26	115.245	27.75	14.98	653	98.73	28.96	18.3	16.3
2024-04-10	987.037	114.932	28.36	15.8	653	109.59	30.08	18.67	15.91
2024-04-11	984.525	114.704	29	14.91	653	108.86	31.27	18.97	16.7
2024-04-12	990.051	115.233	33.16	17.31	746	112.82	32.19	20.21	18.79
2024-04-15	986.216	114.791	35.59	19.23	712	121.15	35.59	22.25	18.52
2024-04-16	982.089	114.339	40.03	18.4	942	119.59	33.61	20.56	19.63
2024-04-17	983.578	114.504	38.54	18.21	713	113.29	33	19.01	18.47
2024-04-18	982.714	114.422	33.54	18	695	108.66	31.4	18.65	17.52
2024-04-19	981.229	114.287	34.34	18.71	674	111.26	31.86	18.51	18.19
2024-04-22	983.516	114.562	31.9	16.94	655	108.56	29.7	17.76	17.11
2024-04-23	983.766	114.603	27.94	15.69	645	106.85	28.86	17.73	15.79
2024-04-24	980.68	114.277	29.46	15.97	646	110.21	29.04	17.45	15.62
2024-04-25	978.369	114.033	31.33	15.37	672	108.55	28.34	17.32	16.36
2024-04-26	980.866	114.278	28.72	15.03	665	104.4	27.81	16.92	15.26
2024-04-29	983.701	114.569	27.28	14.67	634	105.42	27.84	16.92	15.11
2024-04-30	980.275	114.217	29.18	15.65	711	107.46	27.87	16.54	15.57
2024-05-01	979.093	114.217	30.35	15.39	659	100.64	28.7	16.25	15.57
2024-05-02	981.066	114.403	28.19	14.68	670	100.7	27.65	16.05	15.43
2024-05-03	984.124	114.754	26.04	13.49	670	95.96	28.09	15.83	14.44
2024-05-06	985.647	114.895	26.04	13.49	670	94.5	28.58	16.23	14.3
2024-05-07	988.15	115.158	25.45	13.23	670	98.04	27.83	15.75	14.09
2024-05-08	986.722	115.006	24.75	13	670	95.58	27.91	15.29	13.72
2024-05-09	985.755	114.914	24.2	12.69	670	93.85	27.95	16.27	13.46
2024-05-10	984.661	114.795	23.67	12.55	670	94.23	27.88	16.2	13.6
2024-05-13	985.564	114.905	24.18	13.6	572	105.35	28.04	16.52	13.92
2024-05-14	983.77	114.725	24.45	13.42	510	106.55	28.01	16.61	13.96
2024-05-15	988.893	115.264	22.49	12.45	507	93.78	28.07	16.99	13.09
2024-05-16	988.44	115.205	21.96	12.42	507	91.83	27.08	16.26	12.79
2024-05-17	985.218	114.876	21.14	11.99	631	89.35	28.06	17.4	12.13
2024-05-20	984.626	114.822	21.37	12.15	724	88.13	27.89	17.58	12.44
2024-05-21	986.196	114.99	21.88	11.86	513	85.34	27.38	16.76	12.54
2024-05-22	984.889	114.877	21.99	12.29	565	82.49	27.71	16.45	12.74
2024-05-23	981.317	114.507	22.43	12.77	645	86.15	28.66	16.03	12.52
2024-05-24	982.763	114.616	22.17	11.93	596	83.57	27.56	15.26	12.61
2024-05-27	984.615	114.822	22.17	12.36					12.88
2024-05-28	983.428	114.749	23.24	12.92	553	89.67	27.53	15.92	13.31
2024-05-29	979.97	114.399	24.45	14.28	924	93.45	26.77	15.83	14.08
2024-05-30	980.866	114.473	23.68	14.47	635	91.09	29.24	15.74	13.98
2024-05-31	981.389	114.541	23.96	12.92	613	91.14	30.34	15.26	14.14
2024-06-03	984.342	114.88	22.94	13.11	713	93.92	30.84	16	14.06
2024-06-04	986.342	115.087	24.31	13.16	661	100.11	30.59	16.22	14.74
2024-06-05	987.625	115.186	23.17	12.63	659	102.43	29.18	16.5	13.93
2024-06-06	985.608	114.971	22.96	12.58	578	100.99	27.71	16.85	13.34
2024-06-07	982.526	114.624	22.17	12.22	597	91.82	26.42	17.13	13.29
2024-06-10	980.927	114.42	24.73	12.74	663	94.16	25.69	16.66	14.51
2024-06-11	983.37	114.634	28.86	12.85	684	97.27	25.54	16.45	15.76
2024-06-12	987.03	115.053	25.84	12.04	700	91.73	24.8	15.92	14.77
2024-06-13	988.038	115.154	30.18	11.94	700	91.93	24.45	15.71	16.75
2024-06-14	991.713	115.51	40.84	12.66	803	100.16	24.71	16.07	19.87
2024-06-17	988.586	115.154	42.24	12.75	856	99.07	24.17	15.63	19.91
2024-06-18	989.561	115.324	36.84	12.3	951	97.99	23.73	15.64	18.6
2024-06-19	989.487	115.339	36.84	12.48					18.52
2024-06-20	988.434	115.242	37.49	13.28	1049	94.14	24.23	16.4	17.75
2024-06-21	989.728	115.398	39.19	13.2	982	94.09	24.74	15.86	17.6
2024-06-24	988.784	115.355	37.16	13.33	937	95.2	25.42	15.49	17.38
2024-06-25	989.474	115.436	38.31	12.84	950	96.97	25.75	14.88	18.04
2024-06-26	987.861	115.308	39.67	12.55	961	97.91	26.24	14.88	18.98
2024-06-27	988.324	115.375	39.78	12.24	832	95.69	26.28	15.01	19.06
2024-06-28	987.262	115.275	43.67	12.44	940	98.59	26.54	14.72	18.3
2024-07-01	984.893	115.062	36.28	12.22	965	106.23	27.29	14.86	15.9
2024-07-02	985.388	115.13	34.35	12.03	1174	107.51	25.82	14.35	15.88
2024-07-03	988.881	115.512	30.34	12.09	997	102.83	24.62	14.89	14.83
2024-07-04	987.683	115.402	30.34	12.26					14.62
2024-07-05	990.627	115.702	30.01	12.48	823	98.78	23.78	15.62	14.43
2024-07-08	991.699	115.831	26.48	12.37	1026	97.96	23.81	15.13	13.29
2024-07-09	990.113	115.668	28.18	12.51	957	95.62	24.19	14.64	14.6
2024-07-10	991.666	115.819	23.8	12.85	901	92.97	24.01	14.89	13.87
2024-07-11	995.106	116.219	24.1	12.92	889	89.67	24.01	15.74	13.42
2024-07-12	993.756	116.068	22.83	12.46	1053	86.79	24.12	15.12	13.06
2024-07-15	994.556	116.188	23.78	13.12	650	94.5	23.83	15.98	13.59
2024-07-16	995.81	116.296	25.27	13.19	1138	93.87	24.41	17.15	13.86
2024-07-17	996.023	116.308	25.95	14.48	695	91	25.28	16.7	14.55
2024-07-18	997.277	116.475	28.35	15.93	932	91.97	25.68	16.25	15.73
2024-07-19	995.436	116.277	29.33	16.52	885	94.29	26.83	16.34	16.52
2024-07-22	994.395	116.199	27.48	14.91	978	94.45	26.83	15.74	15.69
2024-07-23	996.615	116.451	28.03	14.72	721	95.04	26.74	15.44	14.8
2024-07-24	997.563	116.564	29.58	18.04	846	94.81	26.85	15.98	16.06
2024-07-25	998.684	116.685	29.7	18.46	883	99.08	26.49	15.54	16.93
2024-07-26	999.13	116.748	28	16.39	743	97.76	29.77	15.2	16.15
2024-07-29	1000.79	116.928	28.48	16.6	638	98.65	30.82	15.64	16.83
2024-07-30	1002.04	117.081	28.45	17.69	816	100.42	31.49	16.3	16.53
2024-07-31	1003.58	117.251	27.35	16.36	931	99.41	33.69	17.88	15.74
2024-08-01	1005.63	117.552	35.83	18.59	1000	101.82	33.42	17.61	18.12
2024-08-02	1007.09	117.658	47.01	23.39	885	112.26	38.83	18.7	24.52
2024-08-05	1002.65	117.192	57	38.57	1688	121.22	43.63	21.95	31.17
2024-08-06	1002.98	117.284	52.53	27.71	1267	119.24	40.42	19.1	25.07
2024-08-07	1001.25	117.147	44.04	27.85	1267	112.69	38.01	18.12	20.75
2024-08-08	1001.9	117.174	42.54	23.79	1267	110.42	34.77	18.45	21.63
2024-08-09	1003.42	117.354	41.9	20.37	1267	108.26	33.37	17.8	20.43
2024-08-12	1003.11	117.299	41.51	20.71	1758	118.26	35.17	20.61	19.29
2024-08-13	1005.67	117.582	41.29	18.12	1045	118.44	33.26	19.18	18.34
2024-08-14	1005.77	117.606	36.12	16.19	1123	106.34	31.51	18.49	16.76
2024-08-15	1002.13	117.234	29.68	15.23	1123	103.74	31.14	18.16	15.31
2024-08-16	1003.17	117.387	27.91	14.8	828	102.81	31	20.09	14.5
2024-08-19	1003.25	117.391	28.64	14.65	742	110.13	32.03	18.77	14.92
2024-08-20	1005.44	117.624	30.57	15.88	780	111.57	32.05	18.47	15.46
2024-08-21	1006.43	117.751	29.3	16.27	691	111.38	32.7	18.63	15.48
2024-08-22	1004.57	117.554	29.24	17.55	637	108.5	31.73	17.89	16.01
2024-08-23	1006.38	117.734	27.84	15.86	708	105.63	30.54	17.49	15.31
2024-08-26	1005.5	117.632	27.84	16.15	761	106.66	30.99	17.9	15.66
2024-08-27	1004.23	117.52	28.33	15.43	735	109.22	31.25	17.69	15.46
2024-08-28	1004.98	117.607	29.39	17.11	717	108.76	32.12	17.18	15.59
2024-08-29	1004.73	117.59	28.65	15.65	849	106.7	31.81	17.22	15.23
2024-08-30	1004.75	117.587	29.27	15	749	107.77	33.36	16.4	15.27
2024-09-02	1002.87	117.374	29.27	15.55					15.41
2024-09-03	1005.54	117.652	32.8	20.72	825	114.2	35.36	16.55	17.34
2024-09-04	1008.16	117.919	33.67	21.32	897	119.15	37.95	16.19	19.87
2024-09-05	1008.4	117.961	34.74	19.9	642	114.81	36.61	16.48	20.05
2024-09-06	1011.28	118.257	35.64	22.38	630	107.24	37.58	16.49	22.58
2024-09-09	1011.49	118.315	35.22	19.45	735	104.61	37	16.16	20.23
2024-09-10	1012.36	118.381	37.61	19.08	607	108.36	40.23	16.08	19.54
2024-09-11	1013.29	118.502	38.37	17.69	607	103.79	37.76	15.52	19.6
2024-09-12	1010.55	118.213	32.41	17.07	607	98.03	36.07	16.74	17.53
2024-09-13	1010.91	118.291	29.69	16.56	607	100.6	35.22	16.88	16.05
2024-09-16	1012.79	118.514	30.02	17.14	1153	101.22	34.71	17.03	17.12
2024-09-17	1011.78	118.439	29.24	17.61	880	101.58	35.29	17.49	16.58
2024-09-18	1010.33	118.274	30.02	18.23	633	98.61	36.19	17.13	17.06
2024-09-19	1012.79	118.564	27.89	16.33	633	92.64	33.72	16.76	15.42
2024-09-20	1011.09	118.382	30.55	16.15	628	91	32.22	17.08	16.19
2024-09-23	1014.51	118.727	32.56	15.89	628	93.87	34.39	17.72	16.37
2024-09-24	1016.95	118.996	32.51	15.39	648	93.3	33.76	19.26	16.02
2024-09-25	1014.64	118.734	32.49	15.41	733	91.64	34.4	19.13	16.22
2024-09-26	1015.27	118.816	30.67	15.37	590	90.14	39.76	18.82	16.38
2024-09-27	1016.41	118.969	30.09	16.96	670	92.53	39.62	18.59	15.95
2024-09-30	1017.45	119.075	33.02	16.73	712	94.61	39.86	18.08	18.06
2024-10-01	1021.16	119.471	36.11	19.26	717	104.14	42.87	18.57	21.1
2024-10-02	1018.95	119.244	35.7	18.9	748	102.17	46.52	18.07	19.89
2024-10-03	1018.26	119.187	36.19	20.49	748	101.16	54.5	18.28	21.22
2024-10-04	1014.47	118.852	34.22	19.21	748	100.15	46.37	17.48	20.25
2024-10-07	1013.76	118.736	33.7	22.64	748	124.23	48.32	17.71	20.22
2024-10-08	1013.93	118.756	33.51	21.42	748	123.77	52.35	17.64	20.28
2024-10-09	1013.92	118.74	30.73	20.86	748	122.39	48.8	17.62	19.37
2024-10-10	1014.09	118.775	29.31	20.93	748	116.56	52.36	17.27	19.19
2024-10-11	1014.03	118.763	30	20.46	748	118.47	52.68	17.27	18.47
2024-10-14	1014.37	118.812	30	19.7	801		51.62	17.47	17.67
2024-10-15	1017.33	119.15	30.05	20.64	719	127.23	48.64	17.38	18.6
2024-10-16	1019.42	119.372	30.4	19.58	887	121.86	47.84	17.31	19.21
2024-10-17	1019.32	119.407	29.03	19.11	732	122.14	46.88	17.57	18.27
2024-10-18	1021.17	119.644	28.21	18.03	643	123.13	47.22	17.77	17.25
2024-10-21	1017.57	119.234	31.3	18.37	776	128.95	46.82	18.19	18.85
2024-10-22	1016.44	119.12	32.27	18.2	822	129.26	47.69	18.73	18.62
2024-10-23	1017.08	119.183	33.97	19.24	1093	129.05	47.78	18.98	18.99
2024-10-24	1020.31	119.554	33.18	19.08	845	127.48	46.66	18.66	19.17
2024-10-25	1018.45	119.347	32.48	20.33	829	128.4	48.97	18.88	18.92
2024-10-28	1018.9	119.388	31.88	19.8	716	130.92	42.96	18.34	18.66
2024-10-29	1017.1	119.171	32.82	19.34	798	131.87	42.47	18.51	18.99
2024-10-30	1013.99	118.79	33.33	20.35	786	130.8	41.13	18.68	19.93
2024-10-31	1012.83	118.677	35.99	23.16	784	135.18	48.79	19.46	21.73
2024-11-01	1012.3	118.714	35.14	21.88	825	132.58	44.14	19.29	21.09
2024-11-04	1013.2	118.802	36.3	21.98	887	136.25	45.75	19.91	20.96
2024-11-05	1011.73	118.695	35.02	20.49	966	130.43	45.61	19.59	19.85
2024-11-06	1016	119.168	30.62	16.27	966	117.64	44.74	17.63	18.49
2024-11-07	1014.8	119.075	27.26	15.2	966	104.08	42.55	17.37	16.74
2024-11-08	1017.08	119.308	27.12	14.94	966	99.85	38.76	15.91	16.78
2024-11-11	1020.05	119.632	27.12	14.97	563		37.74	16.02	16.79
2024-11-12	1019.46	119.592	27.23	14.71	642	108.55	34.32	16.25	17.94
2024-11-13	1017.86	119.418	27.32	14.02	642	102.08	37.12	17.05	17.68
2024-11-14	1019.85	119.629	26.29	14.31	625	99.43	30.9	17.39	17.1
2024-11-15	1019.73	119.597	28.13	16.14	751	102.47	35.07	17.17	17.21
2024-11-18	1018.47	119.455	27.82	15.58	579	102.01	36.89	16.97	17.79
2024-11-19	1019.07	119.508	30.05	16.35	579	105.12	37.28	17.85	19.23
2024-11-20	1017.92	119.416	31.11	17.16	579	106.69	36.74	18.34	20.06
2024-11-21	1019.05	119.487	31.52	16.87	579	101.9	36.91	17.59	18.95
2024-11-22	1021.83	119.758	32.87	15.24	733	99.14	35.74	17.54	17.97
2024-11-25	1023.72	119.956	31.83	14.6	875	99.96	37.44	17.8	17.21
2024-11-26	1023.59	119.904	32.53	14.1	875	99.18	38.74	17	17.73
2024-11-27	1024.92	120.011	31.41	14.1	815	97.74	37	16.54	18.3
2024-11-28	1027.05	120.254	31.41	13.9					17.6
2024-11-29	1029.68	120.534	27.68	13.51	815	95.22	34.95	16.37	16.96
2024-12-02	1032.69	120.846	28.77	13.34	835	97.81	34.71	16.33	17.18
2024-12-03	1031.88	120.777	28.68	13.3	831	95.6	34.55	16.21	16.47
2024-12-04	1032.53	120.841	27.12	13.45	831	92.25	33.82	15.92
2024-12-05	1031.09	120.705	24.55	13.54	831	91.48	29.45	15.93	15.01
2024-12-06	1032.03	120.815	23.86	12.77	831	83.2	30.98	15.04	14.48
2024-12-09	1033.32	120.947	23.41	14.19	831	85.63	27.7	15.75	14.68
2024-12-10	1033.67	121.004	24.8	14.18	831	90.1	28.61	16.34	15.18
2024-12-11	1033.84	121.028	22.24	13.58	629	82.4	31.99	16.86	14.07
2024-12-12	1031.48	120.797	22.65	13.92	629	82.66	33.64	15.43	13.84
2024-12-13	1028.8	120.499	24.51	13.81	629	85.66	34.92	15.63	13.75
2024-12-16	1029.43	120.552	24.24	14.69	736	90.88	33.41	15.38	14.42
2024-12-17	1029.28	120.537	25.86	15.87	743	90.42	30.71	15.64	14.57
2024-12-18	1028.86	120.47	24.98	27.62	997	87.21	32.6	16.54	14.52
2024-12-19	1025.52	120.103	30.22	24.09	997	90.41	30.5	15.83	18.63
2024-12-20	1026.66	120.224	30.3	18.36	997	91.75	29.27	15.73	16.84
2024-12-23	1025.29	120.073	31.41	16.78	997	95.85	30.16	15.54	17.19
2024-12-24	1025.28	120.073	30.56	14.27	997	96.95	30.35	14.71
2024-12-25	1025.28	120.073	30.56
2024-12-26	1025.28	120.073	30.56	14.73	997	95.2	30.01	15.19
2024-12-27	1023.36	119.868	29.92	15.95	997	94.8	30.21	14.67	16.27
2024-12-30	1024.9	120.067	32.6	17.4	801	99.08	30.77	15.02	17
2024-12-31	1024.79	120.067	32.14	17.35	801	98.8	30.02	14.62
2025-01-01	1024.79	120.067	32.14
2025-01-02	1025.18	120.043	29.95	17.93	801	96.67	29.54	15.07	17.2
2025-01-03	1021.99	119.701	30.37	16.13	1016	93.35	29.98	14.49	16.93
2025-01-06	1020.69	119.538	27.26	16.04	761	97.89	29.31	14.76	16.43
2025-01-07	1019.92	119.506	28.01	17.82	807	102.78	31.09	14.68	16.31
2025-01-08	1019.07	119.432	27.82	17.7	807	100.76	31.56	14.82	17.11
2025-01-09	1018.02	119.299	28.62	18.07		99.73			16.97
2025-01-10	1016.01	119.13	29.81	19.54	767	96.57	33.91	15.77	18.21
2025-01-13	1015.11	118.998	32.07	19.19	544	103.51	33.98	15.27	18.88
2025-01-14	1014.04	118.888	30.81	18.71	621	101.99	33.51	15	17.7
2025-01-15	1018.15	119.358	27.76	16.12	556	93.1	32.93	15.23	16.1
2025-01-16	1019.37	119.497	26.09	16.6	475	92.72	33.13	15.4	15.56
2025-01-17	1020.76	119.668	25.01	15.97	693	95.6	33.52	14.98	15.72
2025-01-20	1021.7	119.774	25.01	15.81					16.63
2025-01-21	1022.09	119.835	24.07	15.06	717	96.78	35.1	15.5	15.45
2025-01-22	1022.22	119.848	23.52	15.1	716	89.9	34.68	15.24	15
2025-01-23	1021.1	119.734	23.33	15.02	723	88.51	34.18	14.95	14.98
2025-01-24	1019.75	119.587	22.97	14.85	751	86.75	29.98	14.85	14.86

## Sheet: Tam Veri
Date	GBI	CBI	VIXIE	VIX	EVZ	MOVE	OVX	GVZ	VSTOXX	GBI1	CBI1
2020-05-01	1035.15	117.711	87.07	37.19	8.02	48.11	110.18	24.25	38.32
2020-05-04	1033.03	117.409	91.68	35.97	8.35	49.25	97.42	23.68	38.32	-0.00204676	-0.00255882
2020-05-05	1034.72	117.543	89.39	33.61	8.21	49.65	97.27	24.97	34.51	0.00163887	0.00113619
2020-05-06	1031.41	117.126	89.6	34.12	8.23	51.31	115.39	24.47	34.81	-0.00320056	-0.00354424
2020-05-07	1032.48	117.192	88.69	31.44	8.23	54.93	110.62	26.15	32.43	0.00103509	0.000557518
2020-05-08	1032.35	117.192	88.69	27.98	8.17	57.4	98.7	24.89	29.66	-0.00012562	0
2020-05-11	1031.7	117.097	83.16	27.57	7.87	61.6	109.72	23.55	29.91	-0.000633893	-0.000810638
2020-05-12	1031.06	116.962	80.6	33.04	8.44	61.26	86.86	22.45	27.67	-0.000612681	-0.00115119
2020-05-13	1030.91	116.898	81.69	35.28	7.28	57.56	82.83	22.71	33.42	-0.000150233	-0.000542912
2020-05-14	1029.61	116.615	84.86	32.61	8.46	59.05	80.05	24.15	36.32	-0.00125569	-0.00242005
2020-05-15	1029.55	116.591	82.97	31.89	8.42	56.53	76.39	23.63	34.47	-6.10908e-05	-0.000210092
2020-05-18	1027.93	116.441	73.5	29.3	6.96	58.7	76.14	22.81	29.06	-0.00157816	-0.00128226
2020-05-19	1027.8	116.481	67.59	30.53	7.18	60.09	73.22	21.33	30.17	-0.000124523	0.000340085
2020-05-20	1029.65	116.699	61.91	27.99	7.25	58.85	73.62	20.12	29.11	0.00180094	0.00187155
2020-05-21	1032.6	117.058	62.52	29.53	7.07	55.62	89.06	19.74	32.31	0.00286068	0.00307458
2020-05-22	1032.27	117.059	63.19	28.16	6.82	51.67	84.98	18.95	31.42	-0.000310286	7.68851e-06
2020-05-25	1032.28	117.059	63.19	28.16	6.82	51.67	84.98	18.95	29.16	7.94362e-06	0
2020-05-26	1032.83	117.184	57.88	28.01	6.79	52.22	75.47	18.57	28.04	0.000530378	0.00106869
2020-05-27	1035.73	117.6	54.9	27.62	6.88	52.98	73.89	18.51	29.4	0.00281169	0.00355169
2020-05-28	1037.26	117.762	54.95	28.59	7.3	50.57	72.98	18.1	29.01	0.00147316	0.001375
2020-05-29	1038.99	117.924	57.72	27.51	6.72	51.55	69.23	18.15	31.13	0.00166689	0.00137991
2020-06-01	1038.06	117.77	57.11	28.23	6.9	55.07	64.38	18.06	30.1	-0.000890096	-0.00130592
2020-06-02	1040.15	118.066	53.08	26.84	6.85	55.35	64.71	18.1	30.68	0.00200826	0.00250912
2020-06-03	1041.3	118.288	50.2	25.66	7.45	61.24	65.73	18.47	29.61	0.00111119	0.00188539
2020-06-04	1043.62	118.7	50.34	25.81	7.42	61.18	65.13	18.05	27.66	0.00222327	0.00347879
2020-06-05	1049.49	119.303	45.8	24.52	7.3	61.97	64.2	18.17	27.89	0.00562207	0.0050851
2020-06-08	1054	119.731	49.78	25.81	7.4	62.77	67.24	17.94	28.12	0.00430391	0.0035833
2020-06-09	1052.62	119.483	56.28	27.57	7.85	62.94	67.76	19	29.75	-0.00131394	-0.00206714
2020-06-10	1052.19	119.34	58.96	27.57	8.32	60.02	63.06	20.75	30.05	-0.00040423	-0.00119849
2020-06-11	1053.25	119.307	65.25	40.79	8.98	56.47	69.96	23.04	36.02	0.000999531	-0.00027652
2020-06-12	1054.2	119.376	64.12	36.09	9.04	55.81	70.22	20.39	41.41	0.000902259	0.000578339
2020-06-15	1053.29	119.246	66.93	34.4	8.61	58.09	68.11	20.11	38.41	-0.000859518	-0.00109402
2020-06-16	1056.63	119.785	56.47	33.67	8.75	60.49	66.63	19.29	36.1	0.00316684	0.00452595
2020-06-17	1056.71	119.71	57.37	33.47	8.38	58.16	61.45	18.88	35.36	7.70377e-05	-0.000626955
2020-06-18	1055.8	119.569	61.82	32.94	8.29	55.15	61.35	18.31	35.05	-0.000859841	-0.00118035
2020-06-19	1056.22	119.583	60.77	35.12	7.97	53.4523	58.73	18.27	32.21	0.000402823	0.000115415
2020-06-22	1057.03	119.612	64.14	31.77	7.98	53.9318	56.76	19.55	33.78	0.000766789	0.000240838
2020-06-23	1055.51	119.459	57.27	31.37	8.03	54.04	58.83	20.51	31.34	-0.00144262	-0.00127412
2020-06-24	1056.14	119.519	65.1	33.84	8.28	54.89	64.96	20.01	36.81	0.000601795	0.000504775
2020-06-25	1056.86	119.549	66.96	32.22	7.95	51.57	62.69	19.73	34.68	0.000675571	0.000247659
2020-06-26	1057.05	119.548	67.08	34.73	7.61	51.21	63.69	20.52	35.17	0.000179494	-9.20125e-06
2020-06-29	1056.27	119.454	65.53	31.78	7.73	52.96	60.04	19.26	34.49	-0.00073431	-0.000781277
2020-06-30	1056.35	119.471	58.92	30.43	7.74	54.13	57.66	19.65	31.72	7.30873e-05	0.000139802
2020-07-01	1052.37	119.209	57.12	28.62	7.27	53.28	53.43	18.85	30.13	-0.00376325	-0.00219551
2020-07-02	1055.75	119.59	53.95	27.68	6.68	50.96	51.29	17.7	27.59	0.00321217	0.00319859
2020-07-03	1056.26	119.652	53.74	27.68	6.68	50.96	51.29	17.7	28.27	0.000478142	0.000519273
2020-07-06	1056.9	119.77	48.68	27.94	6.92	52.03	50.73	17.42	27.6	0.000606291	0.000984519
2020-07-07	1056.2	119.734	49.94	29.43	6.97	50.98	51.39	17.37	27.93	-0.000664776	-0.000302246
2020-07-08	1056.99	119.774	50.37	28.08	6.92	49.8	48.85	17.74	29.57	0.000752796	0.000333239
2020-07-09	1058.37	119.915	47.12	29.26	7.03	50.07	53.77	17.39	30.45	0.0013089	0.00118139
2020-07-10	1058.79	119.936	47.56	27.29	6.71	49.19	49.71	16.64	28.43	0.000394095	0.000171788
2020-07-13	1056.59	119.711	44.53	32.19	6.88	49.55	53.41	16.53	27.14	-0.00207501	-0.00187267
2020-07-14	1058.14	119.91	46.14	29.52	7.04	50.81	53.04	16	28.93	0.00146054	0.00166317
2020-07-15	1059.73	120.096	44.75	27.76	7.13	47.08	47.05	15.36	27.57	0.00150812	0.00154615
2020-07-16	1061.83	120.335	45.95	28	6.38	46.43	46.12	15.37	26.81	0.00198201	0.00199174
2020-07-17	1061.52	120.325	46.57	25.68	6.75	45.68	40.22	15.09	25.58	-0.000293266	-7.97773e-05
2020-07-20	1062.93	120.522	42.83	24.46	6.78	46.82	42.59	15.3	24.21	0.00132969	0.00163141
2020-07-21	1064.56	120.76	40.08	24.84	6.88	46.45	41.1	16.67	23.49	0.00152945	0.00197807
2020-07-22	1067.12	121.006	40.74	24.32	6.82	45.32	41.3	22.45	24.21	0.00240315	0.00203544
2020-07-23	1067.17	121.013	40.34	26.08	7.21	43.93	43.83	21.99	23.31	4.50747e-05	5.45428e-05
2020-07-24	1065.47	120.83	40.87	25.84	7.39	42.48	42.35	21.61	25.58	-0.00158607	-0.00150728
2020-07-27	1067.75	121.062	42.09	24.74	8.59	42.61	41.37	25.52	25.24	0.00214018	0.00191922
2020-07-28	1069.04	121.2	43.94	25.44	8.38	41.27	41.09	28.96	24.4	0.00120599	0.00113991
2020-07-29	1068.59	121.129	42.75	24.1	8.41	41.63	39.58	26.79	24.23	-0.000418787	-0.000582508
2020-07-30	1070.03	121.26	44.66	24.76	8.8	40.66	42.06	24.13	28.02	0.00134036	0.00108149
2020-07-31	1070.01	121.212	43.62	24.46	8.56	41.98	44.43	24.46	26.66	-1.72893e-05	-0.000398316
2020-08-03	1068.96	121.114	41.3	24.28	8.59	43.13	41.56	23.56	25.76	-0.00097476	-0.000812625
2020-08-04	1070.56	121.32	39.31	23.76	8.45	44.11	40.28	26.3	25.09	0.00149678	0.00170666
2020-08-05	1069.93	121.186	38.25	22.99	8.8	41.75	37.12	25.69	23.94	-0.000592865	-0.00110864
2020-08-06	1071.91	121.41	37.43	22.65	8.52	42.6	37.59	27.36	24.94	0.00185564	0.00184675
2020-08-07	1071.41	121.355	35.76	22.21	8.01	41.46	37.43	26.22	24.2	-0.000470373	-0.000450541
2020-08-10	1073.31	121.58	35.96	22.13	7.66	42.21	35.74	23.89	24.11	0.00177019	0.00185571
2020-08-11	1072.27	121.507	33.93	24.03	7.84	45.26	37.5	27.48	23.39	-0.000962912	-0.00059796
2020-08-12	1071.89	121.478	31.66	22.28	7.97	44.23	34.74	25.85	22.47	-0.000361755	-0.000237846
2020-08-13	1070.51	121.333	33.41	22.13	8.02	45.08	34.87	25.82	22.69	-0.00128111	-0.00119527
2020-08-14	1071.08	121.367	34.69	22.05	7.76	43.09	35.1	23.53	23.87	0.000530307	0.000274451
2020-08-17	1072.5	121.514	35.06	21.35	7.84	45.81	32.43	26.35	22.78	0.00132576	0.00121203
2020-08-18	1073.06	121.582	36	21.51	8.59	46.06	31.7	26.46	23.27	0.000522331	0.000560431
2020-08-19	1073.74	121.672	36.74	22.54	8.51	44.6	32.85	28.15	21.99	0.000631931	0.000743532
2020-08-20	1074.73	121.763	38.34	22.72	8.32	44.58	32.83	25.91	24.04	0.000922571	0.000748733
2020-08-21	1075.26	121.812	37.8	22.54	8	45.14	33.68	25.96	24.34	0.000489146	0.000399956
2020-08-24	1075.1	121.812	35.99	22.37	8.2	46.33	32.25	23.86	23.11	-0.000148244	-1.64187e-06
2020-08-25	1072.03	121.493	37.02	22.03	8.04	47.89	33.03	22.76	23.36	-0.0028523	-0.00261961
2020-08-26	1071.43	121.414	36.95	23.27	7.99	47.99	33.79	24.79	22	-0.000557727	-0.000648599
2020-08-27	1070.86	121.356	35.89	24.47	7.64	49.29	33.74	23.08	23.56	-0.000536945	-0.000478528
2020-08-28	1072.04	121.444	35.36	22.96	8.07	48.19	32.06	23.19	25.16	0.00110454	0.000728437
2020-08-31	1071.33	121.419	35.36	26.41	8.26	47.02	32.59	24.32	26.72	-0.000659864	-0.000205032
2020-09-01	1072.52	121.503	33.74	26.12	8.25	44.3	31.74	23	27.12	0.00111273	0.000689347
2020-09-02	1075.71	121.84	31.62	26.57	8.05	44.86	35.49	23.57	26.61	0.00296982	0.0027703
2020-09-03	1076.96	121.99	33.99	33.6	8.27	45.76	41.28	23.68	29.01	0.00116537	0.00123769
2020-09-04	1075.85	121.854	36.39	30.75	7.67	47.04	44.02	21.98	31.71	-0.00103123	-0.00111812
2020-09-07	1075.63	121.799	35.77	30.75	7.67	47.04	44.02	21.98	27.92	-0.000206999	-0.000447257
2020-09-08	1076.63	121.898	37.28	31.46	8.11	50.68	55.9	22.49	28.45	0.000928666	0.00081199
2020-09-09	1075.14	121.706	34.73	28.81	7.77	48.82	49.42	21.66	25.89	-0.00138395	-0.00158082
2020-09-10	1073.4	121.542	33.37	29.71	8.13	45.21	52.16	21.26	25.01	-0.00161979	-0.0013434
2020-09-11	1076.08	121.803	37.07	26.87	7.72	43.12	50.13	20.2	23.72	0.00250355	0.00214658
2020-09-14	1076.24	121.829	35.69	25.85	7.39	44.21	49.41	20.91	22.57	0.000145528	0.000209354
2020-09-15	1076.37	121.839	34.95	25.59	7.72	43.06	45.19	20.32	22.12	0.000118561	8.61867e-05
2020-09-16	1076.27	121.834	34.86	26.04	7.43	42.43	41.13	20.08	21.99	-9.22547e-05	-3.93962e-05
2020-09-17	1077.59	121.984	36.57	26.46	7.35	38.45	38.73	19.95	22.55	0.00122544	0.00122626
2020-09-18	1077.18	121.955	37.34	25.83	7.21	37.24	39.07	20.22	22.65	-0.000379459	-0.000236917
2020-09-21	1078.08	122.035	47.86	27.78	7.79	38.63	42.89	21.6	29.88	0.000840715	0.000654341
2020-09-22	1076.8	121.842	48.95	26.86	7.73	39.35	41.28	21.63	28.11	-0.00119054	-0.00157578
2020-09-23	1076.27	121.793	47.99	28.58	7.76	38.63	44.64	23.43	27.17	-0.000489599	-0.000403801
2020-09-24	1076.17	121.69	55.49	28.51	7.87	37.22	42.88	23.41	28.34	-9.92313e-05	-0.000847339
2020-09-25	1076.27	121.67	55.38	26.38	7.6	36.97	41.41	22.09	27.81	9.43163e-05	-0.000165174
2020-09-28	1076.31	121.696	51.53	26.19	7.86	37.4	40.64	22.01	26.82	3.69796e-05	0.000218625
2020-09-29	1077.08	121.795	52.08	26.27	7.96	36.62	46.13	23.28	26.9	0.000720612	0.0008135
2020-09-30	1076.56	121.754	50.2	26.37	7.65	39.21	44	22.07	26.06	-0.000483157	-0.000342377
2020-10-01	1076.83	121.911	49.25	26.7	7.78	38.65	49.35	22.39	26.54	0.000252284	0.00129195
2020-10-02	1077.17	121.958	48.79	27.63	7.58	39.97	55.51	22.59	26.82	0.000313976	0.000384707
2020-10-05	1077.34	122.011	46.54	27.96	7.96	39.81	49.44	22.13	26.28	0.000156892	0.000439496
2020-10-06	1077.92	122.126	42.01	29.48	7.87	57.75	46.6	22.79	25.21	0.000533907	0.000940895
2020-10-07	1077.98	122.119	40.56	28.06	8.03	56.98	45.5	23.28	24.97	6.01159e-05	-5.73177e-05
2020-10-08	1079.63	122.299	39.93	26.36	7.66	57.31	41.15	21.96	23.98	0.00153166	0.00147479
2020-10-09	1080.54	122.381	38.85	25	7.56	57.52	42.38	22.44	22.24	0.000837877	0.000667215
2020-10-12	1081.06	122.463	37.58	25.07	7.63	57.52	44.04	22.66	22.25	0.000487072	0.000668404
2020-10-13	1082.11	122.568	39.19	26.07	7.43	55.59	46.07	23.17	22.94	0.000971358	0.000859853
2020-10-14	1082.9	122.641	41.51	26.4	7.37	53.5	43.53	21.88	23.24	0.00072497	0.00059314
2020-10-15	1083.89	122.714	48.18	26.97	7.48	55.62	43.83	21.73	26.84	0.000913936	0.000595234
2020-10-16	1084.6	122.788	42.58	27.41	6.82	57.25	44.06	20.29	25.32	0.000654219	0.000603844
2020-10-19	1085.27	122.86	43.03	29.18	7.53	61.16	43.35	21.33	26.62	0.000617649	0.000590449
2020-10-20	1084.56	122.789	44.16	29.35	7.87	60.42	43.85	21.54	27.63	-0.000652927	-0.000582775
2020-10-21	1084.4	122.798	44.09	28.65	8.12	59.07	47.58	22.66	29.45	-0.000143561	7.49254e-05
2020-10-22	1083.05	122.649	45.61	28.11	8.31	59.73	46.61	21.38	28.99	-0.00124797	-0.00121663
2020-10-23	1083.34	122.686	45.41	27.55	7.92	58.46	46.32	21.04	28.16	0.000267855	0.00030249
2020-10-26	1083.19	122.676	50.1	32.46	8.25	58.95	53.05	20.93	31.76	-0.000133845	-7.58035e-05
2020-10-27	1085.19	122.862	52.34	33.35	8.77	57.88	50.22	20.41	32.74	0.00184676	0.00151292
2020-10-28	1084.46	122.722	65.97	40.28	9.23	57.13	59.61	21.93	38.26	-0.000676284	-0.00113623
2020-10-29	1084.87	122.744	64.51	37.59	8.87	61.3	63.38	21.9	37.55	0.0003765	0.000179266
2020-10-30	1083.98	122.645	63.42	38.02	8.59	61.91	68.84	23.26	35.35	-0.000823694	-0.000807369
2020-11-02	1084.2	122.681	59.94	37.13	8.79	63.56	66.73	23.74	35.23	0.000206831	0.000293529
2020-11-03	1084.38	122.767	54.96	35.55	8.91	64.37	63.63	23.32	32.76	0.000164545	0.000696113
2020-11-04	1085.56	122.919	47.59	29.57	7.07	47.74	54.53	20.49	28	0.00109307	0.00124219
2020-11-05	1086.66	123.137	40.5	27.58	7.41	43.76	53.69	22	26.37	0.00100676	0.00177515
2020-11-06	1086.91	123.153	38.48	24.86	7.45	39.88	55.75	21.1	25.62	0.000234021	0.000130748
2020-11-09	1085.64	123.121	37.11	25.75	7.24	44.94	52.2	21.86	23.86	-0.00116891	-0.000261462
2020-11-10	1085.89	123.105	38.18	24.8	6.87	46.19	49.64	20.46	25.08	0.000233779	-0.00013239
2020-11-11	1087.16	123.241	38.03	23.45	6.88	46.19	49.24	19.14	23.13	0.00116374	0.00110556
2020-11-12	1088.44	123.33	40.17	25.35	7.46	44.17	50.9	18.98	23.3	0.00117904	0.000722973
2020-11-13	1088.91	123.376	40.38	23.1	6.64	42.95	48.24	17.74	23.14	0.000427768	0.000374604
2020-11-16	1089.53	123.503	37.77	22.45	6.65	42.49	46.89	18.31	22.38	0.000574246	0.00102856
2020-11-17	1090.61	123.6	37.34	22.71	6.79	43.08	45.08	17.54	22.25	0.000993547	0.000787024
2020-11-18	1090.48	123.602	36.72	23.84	6.55	43.62	46.06	17.67	20.9	-0.000124059	1.29449e-05
2020-11-19	1090.83	123.645	38.59	23.11	6.36	43.53	46.34	17.96	21.97	0.000323436	0.000349509
2020-11-20	1091.84	123.748	38.71	23.7	6.1	42.31	43.94	17.72	21.44	0.000921866	0.000829793
2020-11-23	1091.77	123.75	37.33	22.66	6.38	43.04	42.79	18.98	22.49	-6.06318e-05	1.93943e-05
2020-11-24	1091.92	123.823	33.73	21.64	6.38	42.38	42.84	20.09	21.37	0.000141422	0.000585049
2020-11-25	1092.18	123.855	34.46	21.25	6.68	39.62	43.56	19.75	20.78	0.000237104	0.000256819
2020-11-26	1092.61	123.902	34.54	21.25	6.68	39.62	43.56	19.75	20.23	0.000391509	0.000381092
2020-11-27	1092.57	123.889	33.62	20.84	6.68	39.64	46.21	19.09	20.08	-3.55113e-05	-0.000102501
2020-11-30	1091.86	123.829	34.46	20.57	6.67	40.84	47.37	19.69	22.91	-0.000655151	-0.000487533
2020-12-01	1089.99	123.618	31.4	20.77	7.17	41.53	47.81	19.61	21.3	-0.00171341	-0.00169832
2020-12-02	1090.03	123.646	31.49	21.17	7.42	43.92	45.68	19.42	21.69	3.91748e-05	0.000224886
2020-12-03	1091.6	123.83	30.88	21.28	7.62	42.53	40.95	19.61	21.32	0.00144602	0.00148569
2020-12-04	1091.67	123.867	32.14	20.79	7.68	43.89	38.34	18.95	20.82	5.78964e-05	0.000302027
2020-12-07	1093.43	124.078	35.24	21.3	8.01	49.67	37.68	19.79	21.44	0.00161469	0.00169859
2020-12-08	1094.71	124.225	36.68	20.68	7.47	49.1	37.7	19.86	20.54	0.00116624	0.00118797
2020-12-09	1094.53	124.221	33.93	22.27	7.63	48.48	39.52	20.26	20.02	-0.000158125	-3.46146e-05
2020-12-10	1094.01	124.17	37.31	22.52	7.32	47.15	39.7	19.66	20.66	-0.000476276	-0.000411365
2020-12-11	1095.41	124.324	41.65	23.31	7.62	47.52	39.51	19.24	23.61	0.00128271	0.00124427
2020-12-14	1094.61	124.245	38.35	24.72	7.74	49.22	39.96	19.43	22.52	-0.000729952	-0.000635436
2020-12-15	1093.93	124.18	37.32	22.89	7.72	48.14	39.34	19.75	21.73	-0.000629902	-0.000526379
2020-12-16	1092.04	123.963	35.08	22.5	7.28	46.96	38.68	19.39	21.14	-0.00172727	-0.00174264
2020-12-17	1092.25	124.028	33.89	21.93	7.3	44.15	36.86	20.1	20.51	0.000197613	0.000518702
2020-12-18	1092.39	124.042	37.3	21.57	6.77	44.64	37.15	19.58	21.63	0.000127535	0.000113684
2020-12-21	1092.29	124.03	50.02	25.16	7.63	46.66	41.56	19.8	27.26	-8.89791e-05	-9.35169e-05
2020-12-22	1092.42	124.036	48.45	24.23	7.38	43.57	42.06	19.5	25.21	0.000117642	4.51503e-05
2020-12-23	1090.12	123.78	44.12	23.31	7.35	42.74	39.89	18.87	23.15	-0.00211081	-0.00205989
2020-12-24	1089.97	123.785	39.93	21.53	6.9	42.11	39.41	18.99	23.15	-0.000137875	3.95863e-05
2020-12-25	1089.97	123.785	39.93	21.53	6.9	42.11	39.41	18.99	23.15	0	0
2020-12-28	1090.71	123.785	39.93	21.7	6.97	45.26	39.67	20.2	21.71	0.000685618	0
2020-12-29	1092.33	124.046	37.86	23.08	7.25	46.1	38.64	19.53	22.38	0.00148187	0.00210769
2020-12-30	1091.74	124.012	37.76	22.77	7.57	47.19	38.01	20.06	23.37	-0.000538208	-0.00027651
2020-12-31	1091.63	124.017	38.48	22.75	7.29	48.98	37.83	20.79	23.37	-0.000105703	3.95124e-05
2021-01-01	1090.97	124.017	38.48	22.75	7.29	48.98	37.83	20.79	23.37	-0.000600205	0
2021-01-04	1093.04	124.228	36.52	26.97	7.43	49.59	42.12	21.86	24.84	0.00189263	0.00170542
2021-01-05	1092.8	124.207	38.89	25.34	7.35	48.95	40.39	22.14	25.2	-0.000213259	-0.000172264
2021-01-06	1091.99	124.129	37.25	25.07	6.99	44.64	39.31	21.7	21.44	-0.000740481	-0.000629596
2021-01-07	1092.12	124.161	36.16	22.37	7	45.2	36.06	20.66	21.02	0.00011566	0.00026102
2021-01-08	1092.59	124.222	35.2	21.56	6.91	44.81	36.65	22.16	20.53	0.000428341	0.000489687
2021-01-11	1091.59	124.099	37.68	24.08	6.93	47.77	35.31	20.65	21.98	-0.000910316	-0.000988555
2021-01-12	1089.69	123.86	38.44	23.33	6.77	50.12	33.85	20.01	21.95	-0.00173883	-0.00192749
2021-01-13	1091.63	124.06	34.95	22.21	6.84	45.6	36.79	18.8	21.09	0.00177628	0.00161634
2021-01-14	1093.19	124.21	34.78	23.25	6.38	46.23	37.95	19.21	19.69	0.00142612	0.00121393
2021-01-15	1092.25	124.118	36.67	24.34	6.52	45.14	40.39	19.04	22.43	-0.000854017	-0.000741483
2021-01-18	1091.47	124.002	37.71	24.34	6.52	45.14	40.39	19.04	21.95	-0.000721261	-0.000936203
2021-01-19	1091.62	124.033	35.5	23.24	6.69	45.23	35.37	18.87	21.75	0.000141003	0.000247576
2021-01-20	1092.11	124.106	32.98	21.58	6.23	42.53	35.67	18.95	20.28	0.000447225	0.000585329
2021-01-21	1090.51	123.944	33.11	21.32	6.57	43.01	35.05	18.85	19.94	-0.0014668	-0.00130454
2021-01-22	1091.51	124.027	32.92	21.91	6.28	43.09	36.25	18.42	21.32	0.000924892	0.000673694
2021-01-25	1093.17	124.205	34.82	23.19	6.48	43.08	38.02	18.51	26.01	0.00151203	0.00143517
2021-01-26	1092.15	124.07	33.64	23.02	6.13	43.14	37.13	17.88	23.1	-0.000927582	-0.00108369
2021-01-27	1092.59	124.072	36.78	37.21	6.42	44.16	40.21	18.47	26.77	0.000399762	1.28959e-05
2021-01-28	1091.62	123.925	38.54	30.21	6.22	45.53	40.45	19.38	25.93	-0.000890089	-0.00118318
2021-01-29	1090.6	123.849	38.27	33.09	6.3	47.41	40.2	20.64	29.01	-0.00092954	-0.000613273
2021-02-01	1091.08	123.904	37.37	30.24	6.53	46.28	39.16	21.81	27.33	0.000440858	0.000442473
2021-02-02	1090.57	123.867	34.72	25.56	6.45	45.91	38.62	19.61	24.02	-0.000468434	-0.000297004
2021-02-03	1090.66	123.886	33.5	22.91	6.56	46.93	37.11	18.45	22.72	8.38094e-05	0.000154197
2021-02-04	1090.22	123.845	30.95	21.77	6.47	47.25	35.37	19.3	21.37	-0.000409201	-0.000337406
2021-02-05	1090.38	123.873	30	20.87	6.19	47.2	34.94	18.7	20.64	0.000149512	0.00023255
2021-02-08	1090.6	123.888	29.72	21.24	6.18	48.45	34.48	18.45	20.44	0.000203691	0.000116248
2021-02-09	1090.91	123.913	30.68	21.63	6.22	46.75	33.54	18.35	21.12	0.000279754	0.000206639
2021-02-10	1090.83	123.903	28.67	21.99	6.22	46.27	33.77	18.57	22.47	-6.50835e-05	-8.23156e-05
2021-02-11	1091.79	123.99	27.7	21.25	6.22	45.95	34.33	18.31	21.21	0.000877218	0.000697319
2021-02-12	1090.35	123.846	27.59	19.97	6.22	47.01	34.25	18.08	20.06	-0.00131765	-0.00115494
2021-02-15	1088.61	123.663	27.2	19.97	6.22	47.01	34.25	18.08	20.15	-0.00160031	-0.00148087
2021-02-16	1087.55	123.562	28.49	21.46	6.31	56.78	35.13	19.57	20.93	-0.000972251	-0.000817544
2021-02-17	1088.2	123.611	29.7	21.5	6.57	55.97	36.9	20.49	21.83	0.000601904	0.000394134
2021-02-18	1087.02	123.485	29.95	22.49	6.21	56.12	37.9	19.66	22.52	-0.00108371	-0.0010169
2021-02-19	1086.17	123.381	28.58	22.05	5.93	60.43	37.76	19.26	20.48	-0.000790046	-0.000840589
2021-02-22	1087.27	123.506	30.34	23.45	6.32	62.42	38.57	19.12	21.69	0.00101946	0.00100988
2021-02-23	1086.18	123.376	32.17	23.11	6.76	61.73	39.75	18.3	23.13	-0.00100554	-0.00105015
2021-02-24	1085.51	123.287	31.06	21.34	6.35	61.92	39.58	18.31	21.43	-0.000614539	-0.000720562
2021-02-25	1081.95	122.908	33.95	28.89	7.55	74.16	40.58	21.26	22.1	-0.00328278	-0.00307818
2021-02-26	1082.3	122.922	38.32	27.95	7.23	75.66	42.49	21.08	26.86	0.000320995	0.000117161
2021-03-01	1086.21	123.359	33.31	23.35	6.69	68.73	42.56	21.33	22.16	0.00361648	0.00355673
2021-03-02	1086.86	123.412	31.66	24.1	6.62	57.7	40.96	20.06	21.81	0.000601173	0.000432072
2021-03-03	1084.95	123.23	32.1	26.67	6.55	65.83	39.83	20.93	21.7	-0.0017614	-0.00147878
2021-03-04	1085.91	123.286	32.25	28.57	7.09	68.13	37.27	21.61	22.09	0.000890364	0.000451189
2021-03-05	1085	123.167	34.92	24.66	6.79	69.37	36.61	20.21	25.08	-0.000841963	-0.000958749
2021-03-08	1084.27	123.093	33.68	25.47	7.22	71.65	38.89	20.64	20.9	-0.000669124	-0.000600808
2021-03-09	1084.69	123.162	32.29	24.03	6.91	67.44	37.97	19.54	20.26	0.000386249	0.000558925
2021-03-10	1084.99	123.174	30.09	22.56	6.89	63.19	37.56	18.55	19.67	0.000269569	9.33728e-05
2021-03-11	1085.7	123.279	27.96	21.91	6.49	63.9	37.86	18.21	18.88	0.000662405	0.000851643
2021-03-12	1084.55	123.153	29.03	20.69	6.63	70.83	37.51	18.36	18.71	-0.00105894	-0.00101559
2021-03-15	1086.28	123.347	30.03	20.03	6.68	70.79	39.38	17.86	18.62	0.00158664	0.00157527
2021-03-16	1086.14	123.325	28.81	19.79	6.83	70.81	39.1	17.93	17.55	-0.000121148	-0.000179169
2021-03-17	1084.21	123.092	30.41	19.23	6.53	66.75	37.4	17.24	17.57	-0.00177987	-0.00189337
2021-03-18	1083.24	122.972	29.17	21.58	6.57	70.48	48.44	17.79	17.46	-0.000892077	-0.000974882
2021-03-19	1084.6	123.111	29.42	20.95	6.33	68.8	44.38	16.57	18.4	0.00124838	0.00113359
2021-03-22	1085.3	123.194	30.39	18.88	6.3	67.62	40.28	16.47	17.68	0.000651302	0.000670126
2021-03-23	1086.08	123.3	28.86	20.3	6.21	60.77	48.62	16.69	17.6	0.000711875	0.000866116
2021-03-24	1086.56	123.366	28.59	21.2	6.38	60.71	64.91	15.7	17.77	0.000442695	0.00052879
2021-03-25	1087.39	123.461	29.62	19.81	6.5	59.54	49.88	15.58	18.88	0.000769496	0.000775743
2021-03-26	1086.69	123.344	28.6	18.86	6.11	61.49	44.93	15.48	17.11	-0.000641903	-0.000946855
2021-03-29	1085.4	123.198	29.15	20.74	6.34	65.96	44.16	17.23	18.35	-0.00119307	-0.00118368
2021-03-30	1083.49	123.004	28.83	19.61	6.4	67.44	41.46	18.3	18.47	-0.00175908	-0.00157388
2021-03-31	1084.55	123.166	26.52	19.4	6.4	71.27	45.65	17.07	17.97	0.000975461	0.00131296
2021-04-01	1085.52	123.448	24.5	17.33	5.72	64.99	40.15	16.74	16.9	0.000902129	0.00229284
2021-04-02	1085.52	123.448	24.5	17.33	5.72	63.71	40.15	16.74	16.9	0	0
2021-04-05	1085.52	123.448	24.5	17.91	5.72	61.79	42	17.08	16.9	0	0
2021-04-06	1086.02	123.506	26	18.12	6.44	60.29	42.41	16.76	17.11	0.000459133	0.000466592
2021-04-07	1085.98	123.532	25.83	17.16	6.45	62.54	41.27	16.11	16.66	-4.28168e-05	0.000210516
2021-04-08	1086.88	123.61	25.48	16.95	6.45	60.08	40.7	15.72	16.16	0.000832524	0.000633844
2021-04-09	1084.55	123.427	25.94	16.69	6.45	61.21	39.19	15.3	16.18	-0.00213952	-0.00148208
2021-04-12	1084.93	123.444	25.37	16.91	5.45	63.5	37.04	14.88	17.05	0.000346041	0.000133682
2021-04-13	1085.14	123.409	26.53	16.65	5.61	61.2	35.2	14.26	16.31	0.000193008	-0.0002811
2021-04-14	1083.78	123.283	24.58	16.99	5.4	60.08	35.7	14.69	16.19	-0.00124786	-0.00102262
2021-04-15	1085.41	123.46	23.18	16.57	5.67	59.05	34.2	15.36	15.71	0.00150131	0.00143897
2021-04-16	1084.44	123.361	23.34	16.25	5.61	62.57	32.79	15.32	16.11	-0.000894131	-0.000805118
2021-04-19	1083.52	123.267	26.93	17.29	6.02	63.96	35.07	16.01	17.21	-0.000845689	-0.000755508
2021-04-20	1084.43	123.341	28.7	18.68	6.18	64.35	35.68	15.59	21.08	0.000838006	0.000592208
2021-04-21	1084.7	123.379	28.24	17.5	6.08	62.27	42.44	16.41	19.28	0.00024446	0.000312955
2021-04-22	1084.84	123.386	28.27	18.71	5.95	59.62	39.39	16.05	17.76	0.000132479	5.91672e-05
2021-04-23	1084.6	123.363	27.51	17.33	5.67	59.98	38.7	15.74	18.19	-0.000220309	-0.000188838
2021-04-26	1084.84	123.371	26.77	17.64	5.87	60.98	41.23	15.51	18.28	0.000222294	6.80917e-05
2021-04-27	1084.64	123.356	27.02	17.56	5.72	60.15	38.44	14.77	19.21	-0.000190903	-0.000126447
2021-04-28	1083.91	123.283	26.25	17.28	5.62	60.31	36.42	14.79	18.38	-0.000671009	-0.000590162
2021-04-29	1082.5	123.115	25.67	17.61	5.5	59.02	36.37	14.54	18.88	-0.00130103	-0.00136109
2021-04-30	1083.3	123.188	25.09	18.61	5.78	58.13	38.39	14.58	20.63	0.000740787	0.00059294
2021-05-03	1083.75	123.224	25.09	18.31	5.92	57.33	40.15	15.65	19.93	0.000418259	0.000287365
2021-05-04	1085.4	123.406	26.81	19.48	6.06	58.51	37.15	15.91	22.82	0.00151566	0.0014778
2021-05-05	1085.28	123.377	26	19.15	5.99	56.93	38.33	15.7	19.9	-0.000110559	-0.000234997
2021-05-06	1085.41	123.382	27.06	18.39	6.06	57.75	37.74	16.57	20.38	0.000119417	4.61999e-05
2021-05-07	1085.15	123.336	25.92	16.69	6.46	54.13	37.63	16.46	18.38	-0.000237607	-0.000377687
2021-05-10	1084.82	123.319	25.86	19.66	6.46	55.48	37.99	17.19	18.5	-0.000299222	-0.000135403
2021-05-11	1082.47	123.023	27.65	21.84	6.46	58.01	37.93	17.17	22.56	-0.00216441	-0.00239946
2021-05-12	1080.79	122.832	29.35	27.59	6.56	58.47	36.94	17.56	23.94	-0.00155579	-0.00155174
2021-05-13	1079.97	122.739	29.73	23.13	6.23	56.59	37.94	17.1	23.35	-0.000763145	-0.000762014
2021-05-14	1080.25	122.773	31.32	18.81	6.23	54.99	36.46	16.75	19.55	0.000264175	0.000275382
2021-05-17	1080	122.735	30.84	19.72	5.95	58.59	36.42	17.62	21.81	-0.000231705	-0.000307072
2021-05-18	1079.75	122.711	31.17	21.34	6.35	57.18	37.01	17	21.31	-0.000229167	-0.000195543
2021-05-19	1079.52	122.661	31.68	22.18	6.46	57.31	38.82	17.79	24.48	-0.000217457	-0.000409092
2021-05-20	1078.72	122.585	31.46	20.67	6.13	55.04	39.43	17.29	22.1	-0.000737829	-0.000617965
2021-05-21	1079.82	122.699	31.35	20.15	5.98	54.59	39.34	16.47	20.35	0.00101611	0.000929968
2021-05-24	1080.34	122.76	30.65	18.4	6.05	54.94	35.54	16.91	19.24	0.000485915	0.000497152
2021-05-25	1081.55	122.918	27.66	18.84	6.36	53.72	36.23	17.09	19.08	0.00111391	0.00128625
2021-05-26	1083.22	123.094	27.24	17.36	6.1	52.82	33.89	16.81	18.28	0.00155222	0.00143673
2021-05-27	1081.88	122.949	26.17	16.74	6.16	53.47	33.63	16.15	17.82	-0.00124397	-0.00118039
2021-05-28	1082.69	123.023	24.94	16.76	6.12	52.04	33.54	16.08	17.17	0.000753043	0.000600248
2021-05-31	1082.56	123.024	24.94	16.76	6.12	52.04	33.54	16.08	19.1	-0.000123488	1.138e-05
2021-06-01	1082.65	123.041	23.83	17.9	6.13	54.99	33.43	16.09	18.77	8.66466e-05	0.000136558
2021-06-02	1083.78	123.166	25.63	17.48	6.01	55.21	32.77	15.65	17.85	0.00104078	0.00101348
2021-06-03	1083.54	123.132	25.82	18.04	6.31	53.96	33.89	15.95	18.24	-0.000216003	-0.000272803
2021-06-04	1084.75	123.276	24.92	16.42	6.31	49.78	31.76	15.83	17.38	0.00111532	0.0011646
2021-06-07	1084.5	123.238	25.77	16.42	5.79	49.55	31.7	15.57	17.71	-0.000236183	-0.000305819
2021-06-08	1085.31	123.351	24.9	17.07	5.77	49.93	31.95	15.59	17.72	0.000748458	0.000918549
2021-06-09	1086.68	123.509	21.71	17.89	5.59	52.84	31.79	15.43	17.23	0.0012671	0.00127928
2021-06-10	1086.81	123.513	20.79	16.1	5.59	48.26	33.03	15.5	16.66	0.00011963	3.15767e-05
2021-06-11	1087.87	123.647	19.59	15.65	5.59	50.85	32.55	15.21	15.15	0.000969807	0.00108977
2021-06-14	1087.4	123.606	19.49	16.39	5.26	54.03	33.13	16.13	16.05	-0.000431762	-0.000335632
2021-06-15	1086.67	123.523	20.32	17.02	5.26	52.92	31.56	16.26	16.41	-0.000670683	-0.000669871
2021-06-16	1087.04	123.564	20.23	18.15	5.53	54.28	33.83	16.3	16.18	0.000338005	0.000328683
2021-06-17	1086.3	123.472	20.46	17.75	5.37	54.91	36.84	17.66	17.08	-0.000676702	-0.000740509
2021-06-18	1086.35	123.499	20.41	20.7	5.76	60.45	33.95	17.9	20.76	4.68563e-05	0.000221102
2021-06-21	1084.81	123.319	21.48	17.89	5.85	61.86	35.01	16.91	19.48	-0.00142256	-0.00146316
2021-06-22	1084.12	123.26	21.61	16.66	5.61	58.64	34.28	16.66	17.57	-0.000630896	-0.000473569
2021-06-23	1084.95	123.346	20.28	16.32	5.65	55.6	34.68	16.2	18.55	0.000767349	0.000694465
2021-06-24	1085.11	123.378	19.76	15.97	5.51	54.83	32.05	15.7	17.35	0.000144614	0.000260244
2021-06-25	1083.93	123.236	19.63	15.62	5.36	55.58	31.3	15.29	16.68	-0.00108579	-0.00115499
2021-06-28	1085.24	123.392	20.34	15.76	5.63	56.33	31.86	15.36	17.65	0.00120958	0.00127074
2021-06-29	1084.93	123.35	20.83	16.02	5.65	56.8	31.99	16.19	16.95	-0.000286664	-0.000340378
2021-06-30	1086.29	123.511	21.31	15.83	6.02	57.27	32.74	15.97	18.18	0.00125095	0.00130036
2021-07-01	1085.06	123.504	21.62	15.48	6	57.52	32.47	15.8	17.73	-0.00113616	-4.93885e-05
2021-07-02	1086.4	123.662	21.24	15.07	6	52.41	32.87	15.28	16.57	0.0012404	0.00127931
2021-07-05	1085.42	123.567	20.49	15.07	6	52.41	32.87	15.28	16.75	-0.000900128	-0.000771455
2021-07-06	1087.89	123.854	21.97	16.44	6	56.55	37.59	15.45	18.13	0.00226971	0.00231939
2021-07-07	1089.29	123.996	22.05	16.2	6	60.65	42.01	15.21	17.32	0.00129002	0.00114974
2021-07-08	1090.06	124.073	25.73	19	6	61.68	38.8	15.82	19.97	0.000705138	0.0006226
2021-07-09	1088.96	123.945	23.66	16.18	6	59.92	37.02	15.27	17.95	-0.00101004	-0.00103648
2021-07-12	1089.31	124.003	23.07	16.17	5.29	60.78	38.73	15.04	17.95	0.00031948	0.000471178
2021-07-13	1089.69	124.035	23.13	17.12	5.34	60.8	35.4	14.84	18	0.000349856	0.000254026
2021-07-14	1090.45	124.118	22.18	16.33	5.49	57.31	38.2	14.79	17.68	0.000700385	0.000669974
2021-07-15	1090.82	124.173	23.15	17.01	5.52	56.98	38.04	15.01	18.64	0.000339034	0.000443933
2021-07-16	1091.83	124.264	23.66	18.45	5.16	58.24	37.15	14.6	19.45	0.000927743	0.000736876
2021-07-19	1093.13	124.42	27.82	22.5	5.59	67.58	46.36	15.96	25.44	0.0011902	0.00125378
2021-07-20	1094.36	124.537	28.48	19.73	6.1	69.31	52.26	15.01	24.49	0.0011199	0.000943577
2021-07-21	1093.56	124.469	26.77	17.91	5.5	65.28	42.91	15.01	21.52	-0.000724628	-0.000550035
2021-07-22	1094.92	124.588	24.75	17.69	5.05	64.96	36.44	14.51	19.91	0.00124373	0.000952044
2021-07-23	1094.96	124.591	23.76	17.2	6.24	65.28	34.05	14.53	17.55	3.4523e-05	3.13033e-05
2021-07-26	1095.07	124.617	24.17	17.58	5.49	69.03	35.59	15.2	18.53	0.000103748	0.000204669
2021-07-27	1096.39	124.743	25.11	19.36	5.68	70.07	35.14	15.51	21.36	0.00120394	0.0010119
2021-07-28	1097.19	124.824	24.72	18.31	5.62	62.4	34.62	15.61	19.48	0.000726474	0.00064693
2021-07-29	1097.04	124.834	23.14	17.7	5.22	62.08	33.36	15.21	19.26	-0.000139174	8.0113e-05
2021-07-30	1097.34	124.895	23.37	18.24	5.16	61.19	32.85	15.09	20.94	0.000276655	0.000489451
2021-08-02	1098.5	124.974	22.91	19.46	5.47	64.29	36.23	15.23	19.84	0.00105546	0.000637336
2021-08-03	1098.67	125.02	23.77	18.04	5.47	65.42	37.55	15.09	20.22	0.000159764	0.000368876
2021-08-04	1098.96	125.042	23.74	17.97	5.54	62.67	42.27	14.88	19.21	0.000260223	0.000172772
2021-08-05	1099.36	125.127	23.11	17.28	5.54	63.57	39.09	14.84	18.25	0.000364527	0.000678172
2021-08-06	1097.31	124.886	22.62	16.15	5.18	62.64	39.31	15.9	17.89	-0.00186754	-0.00192525
2021-08-09	1097.09	124.87	22.66	16.72	5.18	65.72	43.28	17.26	17.55	-0.000200582	-0.00013212
2021-08-10	1097.09	124.878	22.55	16.79	5.18	66.55	39.28	16.93	17.28	7.20089e-06	6.88719e-05
2021-08-11	1096.97	124.855	21.5	16.06	5.18	60.66	38.32	15.85	17.04	-0.000114484	-0.00018498
2021-08-12	1096.89	124.847	20.92	15.59	5.18	57.39	36.5	15.67	16.11	-7.61189e-05	-6.7278e-05
2021-08-13	1096.82	124.854	20.74	15.45	5.18	55.45	35.91	15.15	15.8	-5.58855e-05	6.08747e-05
2021-08-16	1097.27	124.889	21.46	16.12	5.46	59.4	38.84	15.62	18	0.000406629	0.000276322
2021-08-17	1097.15	124.881	22.39	17.91	5.81	60.28	39.5	16.1	18.39	-0.000110547	-6.48577e-05
2021-08-18	1097.6	124.932	22.7	21.57	5.49	58.05	40.86	15.8	18.47	0.000410519	0.000410792
2021-08-19	1097.69	124.926	25.18	21.67	5.36	59.38	40.98	15.91	22.13	8.39104e-05	-4.80262e-05
2021-08-20	1097.87	124.948	24.81	18.56	5.42	59.95	40.67	15.34	20.15	0.00016307	0.000176104
2021-08-23	1097.26	124.887	22.88	17.15	5.4	62.23	38.67	15.84	17.89	-0.000557807	-0.000486603
2021-08-24	1096.79	124.849	22.65	17.22	5.32	63.03	36.79	15.45	18.09	-0.000428341	-0.000306677
2021-08-25	1094.7	124.601	22.54	16.79	5.37	64.51	35.6	15.9	17.83	-0.00189991	-0.0019816
2021-08-26	1094.11	124.565	23.02	18.84	5.35	63.41	36.33	16.44	19.09	-0.000545901	-0.000292934
2021-08-27	1094.19	124.564	22.03	16.39	5.27	57.98	34.93	15.27	17.6	7.4947e-05	-7.22515e-06
2021-08-30	1094.96	124.564	22.03	16.19	5.34	60.14	35.27	15.52	17.5	0.000702347	0
2021-08-31	1092.84	124.408	21.53	16.48	5.56	59.54	34.28	15.47	18.77	-0.00192948	-0.00124916
2021-09-01	1092.41	124.348	20.97	16.11	5.37	58.09	36.13	15.12	17.47	-0.000396488	-0.000482283
2021-09-02	1093.26	124.43	20.86	16.41	5.2	55.8	31.35	14.76	16.97	0.000774251	0.0006522
2021-09-03	1092.25	124.327	22.47	16.41	5.07	53.26	36.91	14.95	18.19	-0.000918998	-0.000821349
2021-09-06	1092.4	124.35	22.17	16.41	5.07	53.26	36.91	14.95	17.56	0.000135866	0.000180974
2021-09-07	1090.08	124.106	22.89	18.14	5.27	57.05	32.91	15.36	18.6	-0.00212358	-0.00195738
2021-09-08	1090.08	124.114	21.75	17.96	5.33	57.02	31.91	15.14	20.49	-3.66945e-06	5.88205e-05
2021-09-09	1091.94	124.297	21.16	18.8	5.11	52.61	33.87	15.1	19.64	0.00171245	0.00147526
2021-09-10	1090.81	124.192	20.68	20.95	5.11	51.73	33.54	15.15	20.36	-0.00103366	-0.000839121
2021-09-13	1090.96	124.199	21.35	19.37	5.16	53.1	32.74	15.09	20.74	0.000129811	5.23381e-05
2021-09-14	1091.2	124.249	21.66	19.46	5.12	51.73	33.63	15.02	20.46	0.000228149	0.000399359
2021-09-15	1090.34	124.171	21.27	18.18	4.93	53.93	32.38	15.14	21.69	-0.000789128	-0.000625359
2021-09-16	1090.11	124.138	20.63	18.69	5.17	53.7	33.16	15.92	21.65	-0.000211768	-0.000262541
2021-09-17	1089.02	124.023	21.28	20.81	5.07	56.06	32.32	15.92	23.17	-0.00100219	-0.000928803
2021-09-20	1090.17	124.154	28.19	25.71	5.44	59.58	35.23	16.85	26.47	0.00105379	0.00106029
2021-09-21	1090.82	124.204	26.69	24.36	5.26	59.2	34.45	16.46	25.51	0.000593487	0.00039628
2021-09-22	1090.62	124.182	24.73	20.87	5.03	55.92	32.43	16.41	22.81	-0.000176565	-0.000177934
2021-09-23	1087.24	123.864	22.67	18.63	4.84	56.79	32.3	16.82	20.62	-0.00309814	-0.00255996
2021-09-24	1086.51	123.757	24	17.75	4.82	58.46	34.01	16.44	21.85	-0.000672894	-0.000862238
2021-09-27	1086.35	123.721	24.31	18.76	4.93	60.5	34.98	16.2	20.83	-0.000144499	-0.000294125
2021-09-28	1085.28	123.61	26.88	23.25	5.23	62.71	36.1	16.78	24.89	-0.000989272	-0.000893142
2021-09-29	1085.94	123.709	26.69	22.56	5.63	61.21	35.26	17.39	23.96	0.000609981	0.000803333
2021-09-30	1085.56	123.614	27.89	23.14	5.4	61.07	38.68	17.16	23.24	-0.000348729	-0.000770354
2021-10-01	1085.81	123.73	28.56	21.15	5.04	57.38	37.38	16.32	24.04	0.000227716	0.00093436
2021-10-04	1085.57	123.71	29.44	22.96	5.43	60.61	37.27	16.77	25.19	-0.000217902	-0.000154369
2021-10-05	1084.3	123.559	29.32	21.3	5.28	62.83	37.2	16.56	22.23	-0.00117569	-0.00122383
2021-10-06	1083.74	123.496	34	21	5.5	60.65	41.02	16.58	24.33	-0.000510561	-0.000511497
2021-10-07	1084.21	123.534	30.15	19.54	5.43	60.91	46.15	16.29	21.02	0.000425931	0.000313371
2021-10-08	1082.37	123.354	30.4	18.77	5.19	59.65	38	15.67	20.28	-0.00169608	-0.00146032
2021-10-11	1080.53	123.155	33.39	20	5.75	59.65	38.51	15.56	20.18	-0.00169564	-0.0016173
2021-10-12	1078.09	122.913	33.11	19.85	5.36	62.95	37.1	15.1	20.74	-0.00225926	-0.00196014
2021-10-13	1079.31	123.039	31.57	18.64	4.99	60.84	36.05	15.51	19.84	0.00113562	0.00102511
2021-10-14	1081.55	123.303	27.98	16.86	4.71	59.35	36.98	15.34	16.99	0.00207317	0.00214647
2021-10-15	1081.68	123.301	26.67	16.3	5.03	62.7	34.05	15.06	16.35	0.000120937	-2.10862e-05
2021-10-18	1078.78	123.071	27.74	16.31	5.09	70.77	35.02	15.53	17.13	-0.0026811	-0.00185968
2021-10-19	1077.52	122.912	26.03	15.7	5.09	68.25	35.14	15.32	16.29	-0.00116974	-0.00129762
2021-10-20	1078.44	123.021	25.45	15.49	5.01	65.47	35.16	15.27	15.98	0.000856503	0.000888443
2021-10-21	1076.64	122.833	25.04	15.01	4.93	69.42	36.55	15.15	16.75	-0.00166861	-0.00152901
2021-10-22	1076.23	122.826	23.96	15.43	4.9	72.04	36.87	15.74	16.4	-0.000386293	-5.45457e-05
2021-10-25	1078.12	122.996	24.25	15.24	5.2	68.96	36.07	16.73	16.28	0.00175548	0.00138326
2021-10-26	1078.08	123.007	22.34	15.98	5.08	66.7	35.5	15.96	16.15	-3.17219e-05	8.78077e-05
2021-10-27	1079.9	123.189	22.13	16.98	5.12	70.06	37.63	16.08	16.92	0.00168141	0.00148366
2021-10-28	1078.53	123.045	23.84	16.53	5.25	71.96	37.23	15.8	17.61	-0.00126947	-0.00117056
2021-10-29	1074.27	122.671	25.86	16.26	5.49	75.45	37.92	16.07	17.62	-0.00394112	-0.00304279
2021-11-01	1075.46	122.735	26.27	16.41	5.57	78.34	36.74	16.31	17.5	0.00110484	0.000520907
2021-11-02	1079.9	123.212	26.11	16.03	5.5	71.04	35.56	16.47	16.86	0.00412809	0.00388969
2021-11-03	1080.05	123.193	25.52	15.1	5.44	71.22	39.44	16.28	16.47	0.000137327	-0.000156641
2021-11-04	1083.66	123.591	23.41	15.44	5.14	64.61	38.56	15.87	15.97	0.00334216	0.0032372
2021-11-05	1085.98	123.861	21.58	16.48	5.19	66.9	37.84	16.64	16.4	0.00214588	0.002183
2021-11-08	1085.27	123.755	21.45	17.22	5.37	70.97	37.71	16.66	17.2	-0.000657744	-0.000861447
2021-11-09	1086.94	123.927	22.59	17.78	5.59	73.02	36.33	16.76	18.06	0.00153796	0.00139712
2021-11-10	1084.48	123.687	22.36	18.73	5.98	78.31	37.09	16.8	17.18	-0.00226443	-0.00193904
2021-11-11	1083.01	123.519	22.97	17.66	6.03	78.31	36.2	16.95	17.09	-0.00135143	-0.00135746
2021-11-12	1084.36	123.62	22.8	16.29	6.04	78.61	36.1	16.85	16.14	0.00124338	0.000818496
2021-11-15	1082.47	123.431	22.99	16.49	6.61	81.59	36.42	17	16.65	-0.0017378	-0.00153535
2021-11-16	1081.25	123.316	22.83	16.37	7.23	81.58	34.69	16.67	16.8	-0.00112853	-0.000932508
2021-11-17	1079.12	123.106	23.58	17.11	6.98	81.58	33.75	16.69	16.68	-0.0019692	-0.00169971
2021-11-18	1081	123.297	23.72	17.59	6.94	74.51	37.68	16.25	17.77	0.00173622	0.00155395
2021-11-19	1084.07	123.632	24.48	17.91	7.13	73.39	37.13	15.99	19.12	0.00284265	0.00271215
2021-11-22	1082.23	123.43	25.04	19.17	7.2	79.21	36.61	16.59	18.88	-0.00170183	-0.00163146
2021-11-23	1079.04	123.092	27.91	19.38	7.17	80.57	35.1	16.81	20.64	-0.0029443	-0.0027384
2021-11-24	1077.27	122.891	29.93	18.58	6.91	83.15	34.79	16.75	20.67	-0.00163544	-0.00162968
2021-11-25	1077.44	122.905	31.17	18.58	6.91	83.15	34.79	16.75	19.88	0.00015697	0.000114736
2021-11-26	1078.09	122.862	41.32	28.62	7.5	89.45	65.72	17.99	32.31	0.000599567	-0.000349863
2021-11-29	1077.19	122.803	41.92	22.96	7.08	89.41	63.34	17.55	28.8	-0.000831656	-0.000485909
2021-11-30	1078.2	122.919	43.29	27.19	7.51	84.04	75.23	17.99	30.07	0.000936044	0.000950305
2021-12-01	1078.05	123.012	41.24	31.12	7.24	82.97	78.18	18.39	26.02	-0.000138471	0.000754153
2021-12-02	1081.06	123.34	42.51	27.95	7.1	82.55	57.27	18.45	30.47	0.00278632	0.00266803
2021-12-03	1081.78	123.405	42.29	30.67	7	79.14	64.55	17.92	31.48	0.000670641	0.000524565
2021-12-06	1082.79	123.544	41.4	27.18	7.01	87.89	56.21	17.44	30.04	0.000931612	0.00113042
2021-12-07	1082.97	123.62	35.01	21.89	6.71	88.14	48.15	17.02	24.87	0.000167438	0.000614354
2021-12-08	1080.65	123.344	33.94	19.9	6.62	80.29	45.22	16.48	24.71	-0.00213847	-0.00223183
2021-12-09	1082.96	123.582	30.72	21.58	6.57	79.54	47.43	16.7	23.52	0.00213297	0.00192145
2021-12-10	1082.84	123.564	31.13	18.69	6.76	74.36	46.23	15.35	22.43	-0.000111639	-0.000139989
2021-12-13	1084.2	123.718	28.12	20.31	5.88	76.41	45.88	15.97	23.02	0.00125633	0.00124065
2021-12-14	1083.77	123.621	28.93	21.89	6.61	78.98	54.76	16.41	24.42	-0.000395131	-0.000775961
2021-12-15	1083.3	123.574	28.42	19.29	5.85	74.06	56.53	15.54	24.74	-0.00043118	-0.000381811
2021-12-16	1082.59	123.55	26.19	20.57	5.7	69.1	49.97	15.22	20.61	-0.000658634	-0.00019988
2021-12-17	1084.36	123.708	27.77	21.57	5.59	72.46	48.31	15.07	21.98	0.00163247	0.00127965
2021-12-20	1084.95	123.74	31.37	22.87	5.66	77.02	60.24	15.77	26.83	0.000545392	0.000264333
2021-12-21	1081.87	123.406	28.81	21.01	5.54	79.52	52.31	15.42	22.83	-0.00283571	-0.00270647
2021-12-22	1081.3	123.328	28.34	18.63	5.44	76.85	46	14.94	21.04	-0.000527419	-0.000628821
2021-12-23	1078.82	123.11	26.12	17.96	5.52	77.29	43.71	14.62	19.04	-0.00229723	-0.00177008
2021-12-24	1078.95	123.114	25.57	17.96	5.52	77.29	43.71	14.62	19.04	0.000125601	3.49282e-05
2021-12-27	1078.66	123.042	25.57	17.68	5.59	80.12	43.58	15.44	19.66	-0.000273413	-0.000580763
2021-12-28	1078.27	123.03	25.57	17.54	5.72	77.52	41.23	15.06	19.07	-0.000357852	-0.000100778
2021-12-29	1076.56	122.844	26.54	16.95	5.62	78	40.24	15.13	20.18	-0.00158819	-0.00151183
2021-12-30	1075.95	122.784	25.27	17.33	5.55	77.62	40.2	14.77	19.27	-0.00057015	-0.000484354
2021-12-31	1075.86	122.789	24.94	17.22	5.29	77.1	42.62	14.61	19.27	-7.98368e-05	3.50207e-05
2022-01-03	1072.99	122.548	24.94	16.6	5.79	84.08	37.57	15.34	19.17	-0.00267135	-0.00195946
2022-01-04	1073.53	122.629	24.46	16.91	5.64	83.11	39.48	15.33	18.64	0.000504014	0.000660964
2022-01-05	1073.83	122.643	25.38	19.73	5.45	78.68	44.49	16.21	17.76	0.000282713	0.000112534
2022-01-06	1072.71	122.443	28.81	19.61	5.7	77.73	36.86	15.87	20.1	-0.00103964	-0.00163238
2022-01-07	1070.47	122.332	29.32	18.76	533	74.69	37	15.04	20.62	-0.00208807	-0.000902462
2022-01-10	1070.43	122.275	31.85	19.4	5.66	78.12	37.65	15.56	22.54	-4.49334e-05	-0.000465127
2022-01-11	1070	122.161	30.28	18.41	5.74	77.85	34.31	15.21	19.79	-0.000393021	-0.000938864
2022-01-12	1070.26	122.298	27.08	17.62	5.53	74.55	34.39	15.32	18.3	0.000239438	0.00112311
2022-01-13	1070.84	122.38	27.94	20.31	5.64	72.57	37.11	15.17	18.46	0.000543793	0.000674583
2022-01-14	1068.68	122.1	30.56	19.19	5.57	76.59	41.18	14.73	21.4	-0.00201748	-0.00229122
2022-01-17	1066.95	121.912	31.68	19.19	5.57	76.59	41.18	14.73	20.04	-0.00162537	-0.00153563
2022-01-18	1066.4	121.845	33.82	22.79	6.06	84.63	42.28	15.09	21.96	-0.000509305	-0.000553676
2022-01-19	1066.05	121.809	33.07	23.85	5.79	80.14	42.75	15.64	22.36	-0.000333458	-0.000297099
2022-01-20	1067.19	121.952	33.45	25.59	5.87	80.96	41.15	15.09	20.4	0.00107631	0.00117315
2022-01-21	1069.03	122.115	37.06	28.85	5.92	81.03	42.57	15.2	24.22	0.00171778	0.00133824
2022-01-24	1069.86	122.209	42.04	29.9	6.21	83.77	47.84	16.3	32.68	0.0007823	0.000774681
2022-01-25	1068.78	122.059	40.85	31.16	6.1	84.57	47.63	16.47	31.45	-0.0010162	-0.00123067
2022-01-26	1068.23	122.012	37.65	31.96	6.07	85.75	45.67	16.42	28.34	-0.000510865	-0.000385879
2022-01-27	1066.41	121.828	40.26	30.49	6.29	85.62	46.9	17.15	28.03	-0.00170637	-0.00150477
2022-01-28	1064.51	121.598	44.52	27.66	6.48	85.29	47.74	17.12	29.41	-0.00178075	-0.00189201
2022-01-31	1060.39	121.206	43.09	24.83	6.69	85.14	42.35	16.7	27.01	-0.00387193	-0.00322292
2022-02-01	1060.01	121.078	39.79	21.96	6.58	85.22	41.31	16.5	24.09	-0.000351004	-0.00105523
2022-02-02	1058.84	121.069	39.01	22.09	6.25	84.85	41.86	15.66	22.64	-0.00110697	-7.84618e-05
2022-02-03	1053	120.216	44.41	24.35	6.96	85.74	42.15	16.01	24.33	-0.00551726	-0.00704477
2022-02-04	1042.5	119.297	53.62	23.22	6.81	87.68	43.88	15.53	26.3	-0.00996649	-0.0076421
2022-02-07	1037.69	118.774	55.26	22.86	7.2	87.44	43.34	16.15	24.24	-0.00461974	-0.00438318
2022-02-08	1038.19	118.772	49.34	21.44	6.96	82.72	41.26	15.86	23.16	0.000483864	-2.02064e-05
2022-02-09	1040.95	119.208	44.9	19.96	6.87	81.76	39.4	15.63	21.41	0.00265847	0.00367091
2022-02-10	1037.6	118.837	48.29	23.91	7.15	88.52	43.81	15.92	21.84	-0.00322292	-0.00310802
2022-02-11	1036.25	118.694	50.47	27.36	8.09	94.03	47.44	17.81	24.66	-0.00130003	-0.00120585
2022-02-14	1035.79	118.574	52.71	28.33	8.07	102.28	48.83	18.95	30.05	-0.000438988	-0.00100679
2022-02-15	1033.93	118.383	47.5	25.7	7.59	94	48.36	17.7	27.06	-0.00179776	-0.00161586
2022-02-16	1036.18	118.621	47.01	24.29	7.45	92.74	49.38	18.07	26.61	0.00217742	0.00201719
2022-02-17	1038.36	118.829	49.33	28.11	7.57	96.17	53.14	19.79	28.79	0.00209877	0.00175095
2022-02-18	1039.79	118.979	51.59	27.75	7.58	94.36	52.01	18.54	31.27	0.00137679	0.00125727
2022-02-21	1037.96	118.746	55.75	27.75	7.58	94.36	52.01	18.54	36.22	-0.0017569	-0.00195834
2022-02-22	1032.18	118.223	53.94	28.81	7.59	95.54	50.11	17.93	32.98	-0.00556439	-0.00440016
2022-02-23	1033.4	118.267	53.53	31.02	7.44	95.15	50.51	17.69	33.46	0.00118119	0.000371332
2022-02-24	1031.06	118.001	62.52	30.32	8.1	100.75	49.04	18.12	38.13	-0.00226949	-0.00224915
2022-02-25	1030.64	117.969	49.47	27.59	7.72	93.34	49.5	18.4	32.12	-0.000405118	-0.000274574
2022-02-28	1033.52	118.213	56.02	30.15	9.17	100.4	52.5	20.97	35.29	0.00279516	0.00207428
2022-03-01	1046.13	119.483	65.6	33.32	11.8	118.26	61.43	22.7	41.58	0.0121979	0.0107391
2022-03-02	1040.6	119.059	69.3	30.74	10.36	110.28	61.53	21.85	38.78	-0.00528579	-0.0035503
2022-03-03	1041.33	118.913	72.57	30.48	10.73	115.18	64.37	22.94	40.45	0.000700367	-0.00122629
2022-03-04	1045.24	119.501	83.71	31.98	13	131.82	77.29	26.29	49.64	0.00375685	0.00494649
2022-03-07	1036.27	118.501	99.96	36.45	13.94	140.03	78.91	29.67	48.24	-0.0085792	-0.00836731
2022-03-08	1030.13	117.832	94.8	35.13	12.43	133.37	75.82	31.7	45.56	-0.00592461	-0.00564131
2022-03-09	1026.3	117.549	79.9	32.45	11.24	110.9	73.25	28.01	41.5	-0.00371982	-0.00240256
2022-03-10	1022.45	117.158	82.89	30.23	11.31	105.31	67.34	26.08	43.35	-0.00374881	-0.00333052
2022-03-11	1021.48	117.04	78.51	30.75	12.02	99.03	68.01	24.73	41.37	-0.000946059	-0.00100292
2022-03-14	1018.03	116.665	77.73	31.77	11.86	105.08	65.42	24.08	40.64	-0.00338126	-0.00320232
2022-03-15	1020.64	116.952	77.76	29.83	11.3	101.03	63.62	23.8	41.2	0.00256191	0.00245745
2022-03-16	1018.55	116.779	68.86	26.67	8.86	100.57	59.35	22.51	36.01	-0.00204362	-0.0014818
2022-03-17	1019.62	116.889	61.82	25.67	8.61	91.76	67.78	22.23	32.02	0.00104295	0.000945376
2022-03-18	1021.37	117.125	60.21	23.87	9.12	91.77	69.09	22	29.9	0.00172212	0.00201387
2022-03-21	1018.88	116.869	61.02	23.53	8.88	101.94	70.78	21.89	28.34	-0.00243594	-0.00218314
2022-03-22	1015.56	116.554	58.84	22.94	8.85	105.38	69.56	20.58	27.48	-0.00326171	-0.00269875
2022-03-23	1017.49	116.751	59.29	23.57	8.61	105.72	72.59	23.41	30.77	0.00190348	0.00169622
2022-03-24	1015.57	116.58	59.4	21.67	8.59	113.14	69.14	24.07	31.16	-0.00188758	-0.00146722
2022-03-25	1013.88	116.417	56.61	20.81	8.13	125.27	68.91	24.68	32.23	-0.00166556	-0.00139647
2022-03-28	1012.78	116.366	55.75	19.63	8.69	129.28	67.04	23.2	30.5	-0.00109007	-0.000440657
2022-03-29	1011.83	116.365	46.97	18.9	8.11	117.92	62.46	21.28	26.58	-0.000933672	-6.01551e-06
2022-03-30	1011.13	116.275	47.92	19.33	8.12	112.98	61.04	21.08	28.1	-0.000693793	-0.000776005
2022-03-31	1017.2	116.846	47.74	20.56	8.42	106.88	57.66	20.25	28.99	0.00600369	0.00490734
2022-04-01	1016.09	116.727	46.4	19.63	8.21	108.34	54.36	19.08	28.5	-0.00109153	-0.00101587
2022-04-04	1018.44	116.991	44.34	18.57	8.94	108.37	54.31	19.22	26.73	0.00231328	0.00226169
2022-04-05	1013.84	116.445	52.12	21.03	9.44	116.37	53.8	18.47	29.16	-0.00451191	-0.00466191
2022-04-06	1013.11	116.287	57.65	22.1	9.55	123.92	53.15	18.88	32.24	-0.000726739	-0.00135686
2022-04-07	1011.2	116.058	57.85	21.55	9.11	122.67	54.23	18.43	32.53	-0.00188667	-0.001977
2022-04-08	1009.54	115.916	57.97	21.16	8.98	124.86	53.14	18.37	30.73	-0.00164093	-0.00122095
2022-04-11	1005	115.346	58.81	24.37	8.82	129.87	54.81	19.25	30.23	-0.00449018	-0.00491736
2022-04-12	1005.96	115.477	57.82	24.26	8.67	117.79	55.25	19.37	30.01	0.000950545	0.00114092
2022-04-13	1007.02	115.559	56.85	21.82	8.4	116.33	51.2	18.7	28.84	0.00105223	0.000706632
2022-04-14	1004.65	115.32	55.18	22.7	8.98	119.66	53.38	17.71	26.75	-0.0023513	-0.00206907
2022-04-15	1004.65	115.32	55.18	22.7	8.98	119.66	53.38	17.71	26.75	0	0
2022-04-18	1004.65	115.32	55.18	22.17	8.98	122.32	50.94	19.07	26.75	0	0
2022-04-19	1002.07	114.948	57.62	21.37	8.54	122.74	50.34	18.19	27.44	-0.00256906	-0.00322494
2022-04-20	1003.52	115.085	52.96	20.32	8.33	125.12	52.23	18.15	24.98	0.00144501	0.00118749
2022-04-21	999.225	114.612	50.53	22.68	8.79	130.69	49.86	18.22	24.54	-0.00427636	-0.00410829
2022-04-22	995.468	114.19	54.41	28.21	9.1	128.12	51.15	18.97	28.34	-0.00375932	-0.00368287
2022-04-25	999.606	114.547	59.36	27.02	8.95	131.63	52.86	19.47	31.46	0.00415644	0.00312813
2022-04-26	1000.54	114.658	63.48	33.52	9.47	129.27	53.57	19.23	32.71	0.00093837	0.000969036
2022-04-27	998.236	114.409	63.22	31.6	10.32	130.11	53.38	19.16	32.74	-0.00230675	-0.00217168
2022-04-28	993.531	113.945	62.88	29.99	11.56	128.74	51.94	19	31.28	-0.00471291	-0.00405563
2022-04-29	991.329	113.7	63.44	33.4	10.51	128.4	53.1	19.83	30.77	-0.00221614	-0.00215192
2022-05-02	990.936	113.675	63.44	32.34	11.21	135.17	54.15	20.06	34.07	-0.000396337	-0.000214601
2022-05-03	989.485	113.625	62.58	29.25	10.82	126.46	54.04	19.71	31.38	-0.00146447	-0.00043897
2022-05-04	986.592	113.324	65.52	25.42	9.76	121.99	53.15	18.81	31.23	-0.00292415	-0.00265346
2022-05-05	985.182	113.169	66.03	31.2	11.01	122.72	54.72	19.36	32.77	-0.00142947	-0.00136247
2022-05-06	976.885	112.247	72.35	30.19	10.82	121.42	54.82	18.71	32.8	-0.00842119	-0.00815326
2022-05-09	976.759	112.219	75.74	34.75	11.19	125.22	57.9	20.49	35.91	-0.000129186	-0.000244105
2022-05-10	981.551	112.649	72.18	32.99	10.26	126.76	56.06	20.02	35.01	0.00490561	0.00383089
2022-05-11	979.765	112.715	66.15	32.56	9.61	118.05	53.43	20.26	31.12	-0.00181886	0.000580563
2022-05-12	986.755	113.296	67.36	31.77	11.25	118.73	52.71	21.51	32.4	0.00713406	0.0051626
2022-05-13	983.74	113.127	63.05	28.87	10.63	114.61	51.22	21.2	29.11	-0.00305547	-0.00149431
2022-05-16	985.661	113.223	63.85	27.47	9.89	117.95	51.89	21.16	28.22	0.00195255	0.000847718
2022-05-17	980.833	112.785	59.29	26.1	9.57	119.46	50.34	20.05	26.24	-0.00489783	-0.003872
2022-05-18	981.276	112.831	62.68	30.96	10.06	114.86	51.89	19.69	27.63	0.000451861	0.000408743
2022-05-19	981.518	112.807	69.56	29.35	9.65	115.05	51.16	20.25	29.47	0.000246006	-0.00020739
2022-05-20	982.151	112.893	65.13	29.43	9.39	111.1	50.72	19.31	28.66	0.000645123	0.000758815
2022-05-23	978.866	112.575	63.47	28.48	9.29	110.19	48.63	19.63	27.58	-0.00334429	-0.00281417
2022-05-24	981.588	112.778	64.29	29.45	9.17	111.15	47.04	19.13	28.61	0.00278067	0.00179791
2022-05-25	981.753	112.765	58.23	28.37	9.35	105.69	46.76	18.27	27.42	0.000167891	-0.000110838
2022-05-26	980.459	112.697	51.78	27.5	9.12	102.49	46.03	17.81	25.66	-0.00131795	-0.000609231
2022-05-27	982.172	112.933	49.3	25.72	8.64	98.48	47.92	17.5	23.85	0.00174745	0.00210122
2022-05-30	979.65	112.697	47.15	26.54	8.64	98.48	47.92	17.5	23.73	-0.00256849	-0.00209416
2022-05-31	975.922	112.312	51.19	26.19	8.58	107.12	49.82	17.19	25.25	-0.00380554	-0.00341358
2022-06-01	973.995	112.094	52.67	25.69	8.78	109.38	49.14	16.94	25.44	-0.00197413	-0.00194102
2022-06-02	971.068	112.094	52.67	24.72	8.6	99.27	47.8	17.13	23.39	-0.00300515	0
2022-06-03	968.833	112.094	52.67	24.79	8.39	97.73	46.23	16.51	23.39	-0.00230107	0
2022-06-06	966.576	111.366	52.69	25.07	8.77	102.26	47.9	16.81	22.97	-0.00233022	-0.00649454
2022-06-07	968.683	111.549	54.27	24.02	8.67	102.61	45.88	16.64	23.59	0.00217986	0.00164143
2022-06-08	965.269	111.213	50.68	23.96	8.7	105.29	44.37	16.04	23.13	-0.00352417	-0.00301392
2022-06-09	958.861	110.525	54.94	26.09	8.62	105.29	43.87	16.29	23.97	-0.00663877	-0.00618365
2022-06-10	952.01	109.73	60.87	27.75	9.19	114.23	42.92	17.58	27.66	-0.00714504	-0.00719113
2022-06-13	938.489	108.28	71.42	34.02	11.32	139.21	47.56	20.84	31.81	-0.0142029	-0.0132188
2022-06-14	931.819	107.561	74.89	32.69	11.38	144.09	46.63	21.99	31.57	-0.00710675	-0.00663744
2022-06-15	936.446	108.077	73.26	29.62	10.27	135.93	47.04	19.4	30.07	0.00496588	0.00480007
2022-06-16	929.755	107.43	81.99	32.95	10.86	138.1	46.27	20.65	32.59	-0.00714488	-0.00599386
2022-06-17	930.558	107.514	81.12	31.13	10.53	133.75	49.19	20.28	30.89	0.000863023	0.000782839
2022-06-20	928.229	107.266	76.62	31.03	10.53	133.75	49.19	20.28	28.59	-0.00250226	-0.00230762
2022-06-21	928.334	107.264	73.25	30.19	9.57	138.91	46.56	18.24	28.11	0.000112472	-1.67808e-05
2022-06-22	933.918	107.831	77.4	28.95	9.53	129.94	48.99	18.29	28.68	0.00601562	0.0052879
2022-06-23	943.946	108.829	79.92	29.05	9.44	125.98	48.58	18.65	29.21	0.0107372	0.00925801
2022-06-24	942.945	108.773	75.11	27.23	8.8	127	46.99	17.92	27.77	-0.00106044	-0.000517324
2022-06-27	938.571	108.302	73.7	26.95	8.94	133.22	46.99	17.88	27.02	-0.00463813	-0.00433288
2022-06-28	933.003	107.768	78.81	28.36	9.16	135.22	46.59	17.95	26.68	-0.00593295	-0.00492791
2022-06-29	937.155	108.182	83.27	28.16	9.68	130.43	48.57	18.08	28.11	0.00445047	0.00384623
2022-06-30	940.946	108.51	87.93	28.71	9.7	135.5	48.9	19.61	29.78	0.00404501	0.00302637
2022-07-01	948.848	109.418	87.21	26.7	10.16	144.17	49.4	20.17	28.76	0.00839814	0.00837344
2022-07-04	943.044	108.778	86.47	27.53	10.16	144.17	49.4	20.17	28.32	-0.0061171	-0.00585642
2022-07-05	951.651	109.723	91.78	27.54	11.51	156.16	52.61	21.33	31.6	0.00912715	0.00869021
2022-07-06	954.725	110.09	88.37	26.73	11.84	151.14	54.67	21.91	30.11	0.00322965	0.00334297
2022-07-07	950.726	109.759	82.33	26.08	11.46	149.71	52.87	20.5	28.32	-0.00418812	-0.00300482
2022-07-08	952.064	109.979	78.34	24.64	11.16	145.25	52.1	19.41	27.55	0.00140661	0.00200804
2022-07-11	957.619	110.562	79.12	26.17	12.68	147.72	53.1	19.72	28.87	0.00583511	0.00529736
2022-07-12	963.104	111.106	79.2	27.29	12.52	148.11	54.4	19.78	29.26	0.00572785	0.00492303
2022-07-13	959.623	110.753	79.82	26.82	12.7	136.1	51.76	18.36	29.85	-0.00361477	-0.00317534
2022-07-14	957.31	110.479	84.36	26.4	13.7	137.76	53.03	19.6	31.82	-0.00241001	-0.00247758
2022-07-15	960.683	110.786	80.35	24.23	12.84	129.85	51.77	19.27	28.82	0.003523	0.00277971
2022-07-18	957.541	110.482	80.13	25.3	12.92	127.69	49.66	19.42	29.06	-0.00326976	-0.00274222
2022-07-19	954.816	110.16	75.03	24.5	12.58	124.7	48.77	18.63	26.72	-0.00284656	-0.0029154
2022-07-20	957.652	110.685	71.34	23.88	12.48	122.9	47.54	19.26	27.4	0.0029701	0.00476034
2022-07-21	960.128	110.936	70.73	23.11	12.04	121.15	51.1	18.71	25.55	0.0025858	0.0022668
2022-07-22	972.121	112.151	67.16	23.03	11.83	123.7	47.84	18.3	24.06	0.0124907	0.0109604
2022-07-25	974.746	112.489	68.65	23.36	11.59	128.27	47.96	18.3	24.53	0.00270028	0.00300665
2022-07-26	977.718	112.75	77.22	24.69	11.66	128.55	47.81	18.06	25.57	0.00304951	0.00232379
2022-07-27	977.631	112.682	77.84	23.24	10.92	117.28	48.99	17.39	24.04	-8.94941e-05	-0.000602217
2022-07-28	986.078	113.564	72.01	22.33	11.02	119.93	47.17	16.84	22.55	0.00864089	0.00782999
2022-07-29	986.065	113.608	66.65	21.33	10.61	116.36	46.19	16.49	22.3	-1.3792e-05	0.000385684
2022-08-01	988.833	113.911	68.29	22.84	10.5	120.5	49.97	17.52	22.96	0.00280732	0.00266618
2022-08-02	987.585	113.759	72.25	23.93	10.68	129.23	52.77	17.34	23.77	-0.00126169	-0.00133525
2022-08-03	983.055	113.308	68.99	21.95	10.76	122.04	50.12	16.76	22.34	-0.00458684	-0.00396716
2022-08-04	986.897	113.681	68.47	21.44	10.28	120.57	55.14	16.95	22.45	0.00390802	0.00329545
2022-08-05	979.769	112.97	69.39	21.15	9.87	122.58	48.76	16.37	22.85	-0.00722243	-0.00625698
2022-08-08	982.753	113.234	66.55	21.29	9.82	124.12	46.4	16.76	22.08	0.00304551	0.00233779
2022-08-09	980.801	113.026	71.09	21.77	9.73	125.12	46.23	16.69	23.28	-0.00198677	-0.00183514
2022-08-10	983.51	113.324	62.12	19.74	9.06	115.26	46.56	16.27	21.79	0.00276183	0.00263744
2022-08-11	980.475	113.041	58.28	20.2	9.01	111.11	45.37	15.81	21.65	-0.00308518	-0.00250255
2022-08-12	979.71	112.97	57.05	19.53	9.03	106.28	44	15.22	21.21	-0.000780336	-0.000622785
2022-08-15	984.717	113.493	57.22	19.95	10.21	113.82	46.63	15.37	21.59	0.0051111	0.00462777
2022-08-16	981.021	113.079	61.1	19.69	10.29	116.83	50.25	15.27	21.34	-0.00375336	-0.0036434
2022-08-17	972.943	112.208	66.17	19.9	10.47	117.7	51.55	15.32	22.75	-0.00823427	-0.00770343
2022-08-18	971.649	112.001	65.44	19.56	11.02	120.26	47.41	15.36	22.67	-0.00133009	-0.0018528
2022-08-19	964.405	111.178	70.47	20.6	11.29	123.81	50.34	15.91	24.58	-0.00745536	-0.00734729
2022-08-22	958.651	110.569	81.15	23.8	12.06	135.89	50.64	16.57	27.37	-0.00596658	-0.00547592
2022-08-23	957.373	110.393	81.62	24.11	11.62	133.85	47.35	15.8	26.92	-0.00133312	-0.00159358
2022-08-24	955.267	110.181	79.61	22.82	11.51	133.13	48.33	15.9	25.45	-0.00219966	-0.0019168
2022-08-25	958.542	110.526	76.61	21.78	11.29	126.33	48.78	15.57	24.72	0.00342805	0.00312758
2022-08-26	954.494	110.105	82.22	25.56	11.1	122.95	47.08	15.42	26.66	-0.00422266	-0.00380726
2022-08-29	949.06	110.105	82.22	26.21	11.54	130.14	47.73	16.02	28.46	-0.00569317	0
2022-08-30	945.504	109.154	89.23	26.21	11.39	127.69	49.74	16.52	28.37	-0.0037476	-0.00863723
2022-08-31	941.607	108.748	90.69	25.87	11.2	124.84	52.11	17.02	27.95	-0.00412161	-0.00371861
2022-09-01	939.131	108.427	88.44	25.56	11.72	126.58	53.9	17.8	29.15	-0.00262891	-0.00294626
2022-09-02	944.014	108.991	79.04	25.47	11.52	120.72	53.9	16.88	25.5	0.00519949	0.00519979
2022-09-05	940.773	108.611	85.13	25.99	11.52	120.72	53.9	16.88	27.79	-0.003433	-0.00348743
2022-09-06	939.78	108.55	83.05	26.91	11.83	133.54	50	17.68	27.35	-0.00105605	-0.000559795
2022-09-07	940.394	108.71	80.12	24.64	11.57	133.12	53.32	16.77	27.13	0.000653238	0.00146752
2022-09-08	935.138	108.115	79.3	23.61	10.99	124.14	51.29	16.4	25.92	-0.00558862	-0.00547513
2022-09-09	937.965	108.427	75.06	22.79	10.68	121.54	48.84	15.91	24.88	0.00302298	0.00288953
2022-09-12	941.922	108.854	71.47	23.87	10.85	123.07	44.15	15.79	24.62	0.00421839	0.00394275
2022-09-13	936.336	108.319	76.57	27.27	11.48	128.87	44.81	16.93	26.04	-0.00593075	-0.00492309
2022-09-14	936.531	108.296	74.82	26.16	11.04	125.35	45.62	17.17	26.24	0.000208579	-0.000211414
2022-09-15	933.913	108.034	74.34	26.27	11.03	124.07	46.63	19.66	25.35	-0.00279585	-0.00241561
2022-09-16	930.718	107.66	78.86	26.3	10.86	124.95	47.44	18.31	26.43	-0.00342045	-0.00346372
2022-09-19	929.897	107.66	78.86	25.76	11.08	133.79	46.75	18.37	26.19	-0.000882222	0
2022-09-20	923.264	106.886	83.37	27.16	11.31	134.66	48.23	18.59	27.16	-0.00713273	-0.00719117
2022-09-21	923.471	106.855	87.18	27.99	10.67	130.54	48.65	18.48	27.27	0.000224421	-0.000283481
2022-09-22	919.184	106.387	89.01	27.35	10.72	131.93	47.1	17.93	28	-0.00464237	-0.00438163
2022-09-23	914.131	106.092	92.58	29.92	12.74	137.28	50.82	19.42	30	-0.00549759	-0.00277665
2022-09-26	911.575	105.689	97.76	32.26	14.09	153.61	56.68	20.26	30.75	-0.00279621	-0.00379106
2022-09-27	906.945	105.155	100.43	32.6	14.21	158.12	55.89	19.26	31.32	-0.00507901	-0.00505632
2022-09-28	907.25	105.095	99.5	30.18	14.24	158.99	55.02	19.27	31.34	0.000336735	-0.000569635
2022-09-29	904.457	104.82	102.16	31.84	14.54	148.14	54.41	19.78	33.07	-0.00307875	-0.00262334
2022-09-30	907.83	105.158	98.37	31.62	14.24	141.89	55.69	19.52	30.71	0.00372931	0.00323222
2022-10-03	916.093	106.053	96.51	30.1	13.8	152.94	56.24	20.29	30.71	0.00910192	0.00850527
2022-10-04	918.883	106.51	87.8	29.07	13.12	151.21	59.51	19.55	29.27	0.00304532	0.00431578
2022-10-05	913.649	105.847	91.2	28.55	13.53	152.01	54.2	19.69	29.86	-0.00569626	-0.00622756
2022-10-06	909.653	105.48	90.59	30.52	13.9	153.29	53.39	19.67	29.17	-0.00437378	-0.00346538
2022-10-07	905.384	105.015	96.31	31.36	13.77	148.46	53.64	19.66	29.92	-0.00469256	-0.0044122
2022-10-10	900.72	104.492	100.05	32.45	14.13	148.46	51.42	20.54	31.87	-0.00515151	-0.00497929
2022-10-11	902.508	104.605	101.06	33.63	13.93	155.57	51.92	20.59	32.01	0.00198463	0.00108429
2022-10-12	899.791	104.29	98.23	33.57	13.93	160.72	51.52	20.4	31.82	-0.00301028	-0.00301323
2022-10-13	897.895	104.07	96.29	31.94	13.19	155.08	50.52	20.07	30.2	-0.0021066	-0.00211334
2022-10-14	898.295	104.068	94.1	32.02	13.08	152.89	50.3	20.07	29.77	0.000445375	-1.92179e-05
2022-10-17	900.139	104.287	90.21	31.37	13.22	150.42	50.27	19.96	29.27	0.00205244	0.00211209
2022-10-18	902.099	104.511	88.33	30.5	12.64	145.79	49.12	19.19	28.92	0.002177	0.00214407
2022-10-19	897.372	104.003	89.36	30.76	12.7	147.73	47.78	19.41	28.3	-0.00523934	-0.00486456
2022-10-20	894.802	103.826	88.84	29.98	12.64	155.61	47.98	19.23	27.75	-0.00286436	-0.00169515
2022-10-21	894.309	103.726	88.53	29.69	12.88	156.95	47.19	19.05	27.83	-0.000550736	-0.000967962
2022-10-24	898.068	104.102	86.24	29.85	12.88	154.02	47.78	19.58	28.68	0.00420302	0.00362879
2022-10-25	903.817	104.756	81.11	28.46	12.65	147.78	47.3	19.33	27.62	0.00640197	0.00628036
2022-10-26	905.673	105.023	78.38	27.28	11.67	140.2	48.58	18.67	26.95	0.0020534	0.00255164
2022-10-27	912.409	105.743	78.48	27.39	11.7	142.78	49.02	18.51	25.87	0.00743701	0.00685466
2022-10-28	908.217	105.382	76.45	25.75	11.89	144.6	47.81	18.01	24.89	-0.0045941	-0.00341487
2022-10-31	907.564	105.251	79.16	25.88	12.37	147.92	47.41	18.27	24.83	-0.000719322	-0.00124404
2022-11-01	908.626	105.546	76.27	25.81	12.16	148.42	47.04	18.45	24.47	0.0011705	0.00279997
2022-11-02	908.006	105.478	75.7	25.86	11.87	141.17	47.75	17.84	24.7	-0.000682239	-0.00064427
2022-11-03	903.179	104.949	77.41	25.3	11.99	136.28	46.47	18.03	23.77	-0.0053156	-0.00501338
2022-11-04	902.584	104.969	72.25	24.55	11.92	128.44	47.5	18.03	22.91	-0.000658895	0.000193427
2022-11-07	903.065	104.969	69.3	24.35	11.88	128.33	45.11	18.12	22.66	0.000532139	-4.7633e-06
2022-11-08	905.314	105.172	67.72	25.54	11.85	126.33	45.04	18.91	22.61	0.00249085	0.00193391
2022-11-09	909.948	105.571	66.75	26.09	11.95	124.4	45.38	18.91	23.24	0.00511867	0.0037976
2022-11-10	919.34	106.624	58.43	23.53	11.69	111.69	43.48	17.69	21.32	0.0103217	0.00997052
2022-11-11	915.863	106.275	53.75	22.52	12.13	111.69	42.06	17.57	20.78	-0.0037826	-0.00326663
2022-11-14	917.291	106.408	54.07	23.73	12.22	119.99	44.42	17.41	20.94	0.00155995	0.001243
2022-11-15	920.807	106.74	51.95	24.54	12.23	128.62	46.72	17.72	20.86	0.0038327	0.0031229
2022-11-16	925.073	107.115	54.27	24.11	12.29	130.83	45.12	17.23	21.17	0.00463289	0.00350947
2022-11-17	924.087	107.001	57.14	23.93	12.41	132.18	45.34	16.77	21.82	-0.00106543	-0.00105868
2022-11-18	926.078	107.219	53.38	23.12	11.88	129.33	45.93	16.51	20.88	0.00215402	0.00203269
2022-11-21	927.895	107.371	54.08	22.36	12.22	132.13	47.11	16.68	21.17	0.00196215	0.00141766
2022-11-22	929.517	107.493	51.68	21.29	11.68	133.53	46.3	16.07	20.22	0.00174826	0.00113905
2022-11-23	931.872	107.737	48.15	20.35	12	136.2	51.56	15.84	19.51	0.00253379	0.00227178
2022-11-24	936.833	108.234	45.27	20.42	12	136.2	51.56	15.84	19.56	0.00532294	0.00460844
2022-11-25	932.118	107.774	47.36	20.5	11.81	129.6	50.16	15.23	19.93	-0.00503227	-0.00424452
2022-11-28	932.552	107.816	52.73	22.21	11.87	131.73	50.53	15.77	21.52	0.00046507	0.000383209
2022-11-29	936.959	108.252	52.54	21.89	11.83	131.23	47.91	15.71	21.7	0.00472553	0.00404487
2022-11-30	935.323	108.104	53.2	20.58	11.39	127.27	46.15	15.45	21.21	-0.00174543	-0.00136072
2022-12-01	943.304	108.981	49.32	19.84	12.65	119.77	45.61	15.92	20.32	0.00853224	0.00810791
2022-12-02	942.096	108.825	49.91	19.06	11.48	118.62	45.76	15.42	19.33	-0.00128008	-0.00143328
2022-12-05	942.597	108.957	51.59	20.75	11.41	126.5	45.41	15.81	19.82	0.000532111	0.00121939
2022-12-06	946.266	109.346	54.2	22.17	11.26	129.09	46.36	16.19	20.81	0.00389233	0.00356286
2022-12-07	947.217	109.45	55.28	22.68	11.18	131.1	47.91	16.55	22.03	0.00100437	0.000955686
2022-12-08	945.93	109.328	56.15	22.29	10.75	129.54	47.17	16.45	21.79	-0.00135872	-0.00111375
2022-12-09	939.685	108.781	53.37	22.83	10.3	132.79	46.93	16.26	21.4	-0.00660218	-0.00500512
2022-12-12	939.065	108.731	54.96	25	9.92	141.93	44.99	15.51	22.54	-0.000659583	-0.00045964
2022-12-13	942.34	109.057	50.86	22.55	8.94	135.08	43.37	14.71	20.39	0.0034873	0.00300007
2022-12-14	942.364	109.059	49.57	21.14	7.96	120.26	41.82	14.06	20.34	2.5893e-05	1.65051e-05
2022-12-15	933.503	108.152	53.9	22.83	8.46	111.26	43.7	14.39	20.84	-0.00940274	-0.00831202
2022-12-16	928.212	107.637	64.71	22.62	8.18	113.65	42.29	14.14	21.32	-0.00566843	-0.0047655
2022-12-19	928.062	107.601	67.32	22.42	8.22	118.32	42.47	14.49	20.6	-0.000160739	-0.00033167
2022-12-20	923.783	107.148	69.23	21.48	8.3	119.92	41.79	15.03	20.69	-0.00461079	-0.00420813
2022-12-21	923.692	107.136	63.09	20.07	8.16	115	41.18	14.78	19.06	-9.91574e-05	-0.000117594
2022-12-22	921.991	106.973	60.78	21.97	8.44	112.05	41.8	14.88	19.96	-0.00184087	-0.00152237
2022-12-23	919.582	106.752	58.35	20.87	8.43	113.17	41.21	14.86	20.04	-0.00261336	-0.00206501
2022-12-26	919.582	106.752	58.35	20.87	8.43	113.17	41.21	14.86	20.04	0	0
2022-12-27	916.124	106.752	58.35	21.65	8.97	124.89	43.5	16.3	20.66	-0.00376051	0
2022-12-28	916.505	106.398	58.19	22.14	9.07	120.07	43.95	15.99	20.51	0.000415664	-0.00331891
2022-12-29	918.518	106.582	57.97	21.44	9.3	120.25	42.6	16.18	19.93	0.00219704	0.00173782
2022-12-30	915.058	106.239	56.49	21.67	9.47	121.61	41.26	16.25	20.89	-0.00376683	-0.0032191
2023-01-02	919.941	106.239	56.49	21.67	9.47	121.61	41.26	16.25	20.77	0.00533638	0
2023-01-03	921.424	106.879	55.2	22.9	9.67	129.97	44.14	17.26	20.28	0.00161141	0.0060166
2023-01-04	927.263	107.422	51.41	22.01	9.68	125.78	45.83	17.35	19.45	0.00633737	0.00508802
2023-01-05	925.885	107.215	52.96	22.46	9.76	119.53	43.93	16.78	19.53	-0.00148599	-0.00193535
2023-01-06	930.962	107.737	48.77	21.13	9.56	113.87	42.94	16.44	18.49	0.00548264	0.00487434
2023-01-09	930.825	107.717	46.34	21.97	9.73	116.67	42.75	16.92	19	-0.000146408	-0.000182853
2023-01-10	927.707	107.425	48.91	20.58	9.63	119.52	41.6	16.59	19.25	-0.00335036	-0.00271544
2023-01-11	932.631	107.925	45.59	21.09	9.53	115.17	41.19	16.32	19.34	0.00530771	0.00465441
2023-01-12	936.354	108.313	44.42	18.83	9.17	112.34	39.28	15.95	17.94	0.00399172	0.00359787
2023-01-13	937.55	108.483	44.12	18.35	8.79	113.55	38.19	16.37	17.34	0.00127762	0.00156675
2023-01-16	938.324	108.55	45.52	19.49	8.79	113.55	38.19	16.37	18.35	0.000825876	0.000622218
2023-01-17	943.255	109.051	44.35	19.36	9.15	122.27	40.1	16.49	18.62	0.00525501	0.004608
2023-01-18	947.084	109.462	42.97	20.34	8.99	112.61	39.25	16.19	18.12	0.00405977	0.00376889
2023-01-19	943.892	109.15	46.97	20.52	8.88	114.53	39.02	16.71	20.3	-0.00337077	-0.00284849
2023-01-20	940.004	108.744	47.12	19.85	8.59	114.76	37.81	16.4	18.68	-0.00411965	-0.00371508
2023-01-23	939.514	108.699	44.57	19.81	9.01	114.69	37.3	16.2	18.16	-0.000520743	-0.000418413
2023-01-24	941.784	108.912	44.5	19.2	8.81	112.76	38.26	16.17	18.06	0.00241572	0.00196598
2023-01-25	942.786	109.021	45.57	19.08	8.81	107.74	38.54	16.12	18.42	0.00106404	0.000995294
2023-01-26	941.17	108.863	43.65	18.73	8.8	104.28	38.12	15.59	18.17	-0.00171364	-0.00144835
2023-01-27	940.386	108.799	42.99	18.51	8.6	100.7	38.6	15.23	17.29	-0.000832687	-0.000585139
2023-01-30	936.848	108.457	44.97	19.94	9.13	103.77	40.18	15.59	18.75	-0.00376281	-0.00314892
2023-01-31	937.884	108.575	45.04	19.4	9.09	99.54	38.55	15.75	18.57	0.00110594	0.0010926
2023-02-01	937.211	108.582	44.18	17.87	8.7	97.33	37.99	15.22	18.7	-0.00071736	6.26294e-05
2023-02-02	952.742	110.155	38.73	18.73	8.66	97.76	38.49	15.14	16.67	0.0165715	0.0144877
2023-02-03	946.917	109.653	37.76	18.33	8.63	98.99	39.48	15.06	16.76	-0.00611425	-0.00455449
2023-02-06	942.719	109.266	41.23	19.43	9	105.63	38.92	15.81	18.64	-0.00443302	-0.0035366
2023-02-07	941.981	109.196	40.92	18.66	9.33	103.15	37.31	15.62	18.76	-0.000782736	-0.00063698
2023-02-08	939.372	108.881	40	19.63	8.84	100.75	37.02	15.46	18.72	-0.00276969	-0.00288472
2023-02-09	941.579	109.1	38.91	20.71	9.05	102.45	35.75	15.52	18.17	0.0023488	0.00200678
2023-02-10	937.73	108.682	43.72	20.53	9.15	109.63	35.89	15.46	20.47	-0.00408792	-0.00382953
2023-02-13	936.82	108.563	43.95	20.34	9.59	110.67	37.77	15.58	19.79	-0.000970322	-0.00109586
2023-02-14	933.969	108.257	42.47	18.91	8.64	110.59	36.67	14.88	18.9	-0.00304328	-0.00281036
2023-02-15	932.677	108.095	42.17	18.23	8.5	108.64	35.7	14.9	17.62	-0.00138356	-0.00149736
2023-02-16	932.089	108.014	41.93	20.17	8.27	111.01	35.03	14.92	18.05	-0.0006298	-0.000754889
2023-02-17	932.943	108.093	45.04	20.02	8.44	110.11	36.04	14.69	19.23	0.000916329	0.000731388
2023-02-20	932.63	108.063	44.89	21.23	8.44	110.11	36.04	14.69	19.53	-0.000336248	-0.000278464
2023-02-21	928.359	107.599	48.51	22.87	8.51	119.62	37.05	15.48	20.89	-0.00457856	-0.0042901
2023-02-22	929.448	107.645	48.05	22.29	8.49	118.21	38.36	15.05	21.18	0.0011725	0.000427513
2023-02-23	930.878	107.81	46.34	21.14	8.48	117.45	36.69	14.84	20.24	0.00153855	0.00153003
2023-02-24	927.213	107.432	47.16	21.67	8.49	122.84	37.25	14.56	21.67	-0.00393714	-0.00350339
2023-02-27	926.091	107.278	45.74	20.95	8.45	120.03	37.55	14.35	19.96	-0.00120954	-0.00143626
2023-02-28	922.973	106.944	45.99	20.7	8.24	123.6	35.42	14.17	19.5	-0.00336738	-0.00310968
2023-03-01	919.133	106.556	45.96	20.58	8.51	121.08	36.63	14.16	20.11	-0.00416025	-0.003629
2023-03-02	918.322	106.47	46.86	19.59	8.5	124.12	35.61	13.94	19.67	-0.000882462	-0.000804271
2023-03-03	917.95	106.434	43.49	18.49	8.35	122.52	35.2	13.93	18.12	-0.000405522	-0.000345636
2023-03-06	917.909	106.445	41.07	18.61	8.37	128.19	33.03	14.24	17.87	-4.36843e-05	0.000110867
2023-03-07	918.888	106.531	41.37	19.59	8.61	133.33	33.76	14.2	18.43	0.00106645	0.000806986
2023-03-08	920.123	106.681	39.86	19.11	8.68	129.76	33.39	13.79	18.06	0.00134391	0.00140991
2023-03-09	920.74	106.71	40.73	22.61	9.02	129.28	34.86	14.3	18.02	0.000669802	0.000266213
2023-03-10	927.81	107.386	47.06	24.8	9.26	140.06	36.76	16.57	21.17	0.00767937	0.00633868
2023-03-13	935.418	107.97	65.28	26.52	9.33	173.59	38.13	20	25.86	0.00819931	0.00543459
2023-03-14	923.549	106.839	68.68	23.73	8.56	169.65	47.41	17.95	22.76	-0.012688	-0.0104724
2023-03-15	936.357	107.941	83.94	26.14	9.79	198.71	49.78	19.75	32.02	0.0138681	0.0103118
2023-03-16	930.524	107.229	99.33	22.99	9.37	167.96	48.65	17.38	26.65	-0.00623	-0.00659528
2023-03-17	935.733	107.759	101.36	25.51	9.49	180.11	51.48	22.83	30.04	0.00559835	0.00494642
2023-03-20	932.894	107.486	87	24.15	9.59	182.64	51.14	21.4	28.43	-0.00303366	-0.00253528
2023-03-21	929.75	107.553	69.93	21.38	9.12	162.31	48.12	19.14	24.11	-0.00337026	0.000625197
2023-03-22	928.615	107.546	65.87	22.26	9.49	142.84	46.97	19.22	22.25	-0.00122065	-7.25221e-05
2023-03-23	935.814	108.2	69.16	22.61	9.3	151.4	46.9	20.95	21.57	0.00775187	0.00608579
2023-03-24	937.428	108.244	78.35	21.74	9.62	173.66	48.36	19.96	24.88	0.00172513	0.00040573
2023-03-27	933.833	107.885	72.62	20.6	9.41	161.67	45.41	19.18	23.06	-0.00383496	-0.00331843
2023-03-28	929.89	107.528	71.81	19.97	9.31	155.96	44.31	19.03	22.09	-0.00422281	-0.0033026
2023-03-29	929.618	107.554	64.89	19.12	8.92	150.58	43.33	17.77	20.4	-0.000291755	0.000236216
2023-03-30	927.751	107.535	60.93	19.02	9.55	141.24	42.02	18.39	19.78	-0.00200835	-0.000174796
2023-03-31	931.106	107.947	57.01	18.7	9.1	135.93	40.34	17.31	19.42	0.00361595	0.00382852
2023-04-03	935.452	108.439	56.95	18.55	8.58	138.17	39.49	18.25	19.09	0.00466703	0.00455502
2023-04-04	936.119	108.481	56.51	19	8.65	147.75	39.42	19.73	19.02	0.000713345	0.000391927
2023-04-05	940.137	108.86	58.73	19.08	8.77	153.9	39.14	18.98	19.93	0.0042923	0.00349093
2023-04-06	940.484	108.812	57.44	18.4	8.71	147.73	34.76	18.44	19.12	0.000368776	-0.000441853
2023-04-07	940.484	108.812	57.44	18.4	8.71	139.2	34.76	18.44	19.12	0	0
2023-04-10	940.484	108.812	57.44	18.97	8.71	143	34.31	18.54	19.12	0	0
2023-04-11	935.202	108.244	53.02	19.1	8.37	139.78	34.23	18.33	18.82	-0.00561647	-0.00521819
2023-04-12	932.807	108.002	50.45	19.09	8.09	129.68	33.74	17.69	18.63	-0.00256073	-0.00223292
2023-04-13	933.653	108.112	49.09	17.8	7.98	119.95	32.78	18.48	17.64	0.000906833	0.00101757
2023-04-14	931.671	107.939	46.86	17.07	7.71	118.84	32.51	17.16	16.44	-0.0021221	-0.00160112
2023-04-17	930.726	107.883	47.2	16.95	7.75	122.69	32.93	17.37	17.46	-0.00101484	-0.000517886
2023-04-18	932.612	108.139	45.63	16.83	7.76	122.78	33.69	17.14	16.9	0.00202713	0.00237201
2023-04-19	930.308	107.88	46.72	16.46	7.97	124.02	34.44	17.21	16.93	-0.00247134	-0.00239414
2023-04-20	932.687	108.091	49.38	17.17	8.33	120.61	36.41	17.21	17.73	0.00255743	0.00195866
2023-04-21	931.647	107.944	48.74	16.77	7.91	120.84	35.17	16.42	17.08	-0.00111452	-0.00135996
2023-04-24	931.746	107.96	48.05	16.89	7.8	126.28	34.28	16.88	17.16	0.000106371	0.000142666
2023-04-25	936.272	108.457	49.81	18.76	8.15	137.13	36.64	17.72	17.93	0.00485669	0.00460913
2023-04-26	936.028	108.329	51.67	18.84	8.66	130.39	39.25	17.74	18.78	-0.000260288	-0.00118756
2023-04-27	933.526	108.056	48.89	17.03	8.38	122.43	37.76	17.28	18.18	-0.00267278	-0.00251457
2023-04-28	939.742	108.726	47.2	15.78	8.04	122.46	35.63	16.47	17.43	0.0066582	0.00619771
2023-05-01	938.128	108.731	47.2	16.08	8.38	128.18	35.94	16.63	17.43	-0.00171739	5.24255e-05
2023-05-02	940.867	109.015	51.37	17.78	8.52	137.55	39.48	18.69	20.57	0.00291975	0.00260366
2023-05-03	940.331	108.913	52.76	18.34	8.54	134.5	43.23	18.7	19.94	-0.000570006	-0.000932903
2023-05-04	943.844	109.193	56.41	20.09	8.53	140.71	43.75	20.35	20.83	0.00373592	0.00257362
2023-05-05	939.849	108.827	53.06	17.19	8	130.21	37.35	18.5	18.28	-0.00423206	-0.00335003
2023-05-08	938.794	108.688	53.06	16.98	8	135.07	35.54	18.67	18.07	-0.00112231	-0.0012846
2023-05-09	937.823	108.622	53.93	17.71	7.98	133.93	35.13	18.73	18.92	-0.00103505	-0.000603565
2023-05-10	939.908	108.835	50.73	16.94	7.98	125.6	34.13	18.37	18.67	0.00222323	0.00196553
2023-05-11	942.564	109.098	49.14	16.93	7.98	128.21	35.74	17.77	18.56	0.00282581	0.0024119
2023-05-12	940.575	108.941	46.82	17.03	7.98	120.52	37.32	17.37	17.01	-0.00210967	-0.00144366
2023-05-15	938.555	108.775	47.95	17.12	7.77	127.89	35.16	17.52	17.17	-0.00214752	-0.00151918
2023-05-16	934.968	108.449	48.21	17.99	7.18	130.3	35.98	17.62	16.88	-0.00382258	-0.00299793
2023-05-17	933.62	108.277	47.66	16.87	7.47	120.78	36.44	16.99	16.95	-0.00144197	-0.00158416
2023-05-18	929.289	107.925	44.07	16.05	7.32	122.5	36.02	16.95	15.66	-0.00463851	-0.00325092
2023-05-19	930.906	108.101	41.88	16.81	7.32	127.51	35.85	17.22	15.72	0.00174026	0.00162891
2023-05-22	930.009	108.02	42.21	17.21	7.54	132.29	35.52	17.55	16.31	-0.000964114	-0.000748375
2023-05-23	929.992	108.024	42.65	18.53	7.91	131.7	35.11	17.66	17.67	-1.81719e-05	3.88817e-05
2023-05-24	930.116	108.012	47.17	20.03	7.79	132.29	35.86	17.56	20.93	0.000134087	-0.000115715
2023-05-25	928.615	107.848	45.49	19.14	7.74	139.54	36.74	16.84	19.86	-0.00161474	-0.00151187
2023-05-26	925.968	107.641	43.06	17.95	7.53	145.37	35.95	16.3	17.6	-0.00285005	-0.00192492
2023-05-29	931.016	108.056	43.06	17.46	7.53	145.37	35.95	16.3	17.87	0.00545148	0.00385449
2023-05-30	935.586	108.562	43.2	17.46	7.54	141.36	39.68	15.88	17.96	0.00490894	0.0046874
2023-05-31	938.863	108.899	45.96	17.94	7.67	136.02	40.68	15.63	19.98	0.00350208	0.00310329
2023-06-01	940.12	108.98	42.39	15.65	7.2	124.63	40.5	15.5	17.55	0.00133875	0.000745644
2023-06-02	937.598	108.736	39.01	14.6	6.91	120.95	39.6	14.32	16.03	-0.00268221	-0.00224444
2023-06-05	934.857	108.472	39.93	14.73	7.06	119.08	37.45	14.27	16.12	-0.00292332	-0.00242331
2023-06-06	935.608	108.532	38.71	13.96	7.06	114.42	36.07	13.94	15.4	0.000802904	0.000554059
2023-06-07	933.086	108.312	37.93	13.94	6.86	120.5	34.13	13.81	15.33	-0.00269525	-0.00202612
2023-06-08	934.815	108.479	37.87	13.65	7.02	115.11	35.18	13.94	15.1	0.00185353	0.00153537
2023-06-09	936.883	108.683	37.64	13.83	7.02	115.77	33.7	13.69	14.99	0.00221156	0.00188516
2023-06-12	937.566	108.79	37.42	15.01	6.72	119.8	36.35	13.7	15.18	0.00072944	0.000978992
2023-06-13	935.496	108.579	37.73	14.61	6.43	118.8	32.38	13.45	14.78	-0.00220784	-0.00193309
2023-06-14	934.64	108.484	35.3	13.88	6.07	114.37	33.66	12.84	14.23	-0.000915236	-0.000873095
2023-06-15	930.908	108.104	36.44	14.5	6.96	107.34	33.07	13	13.72	-0.00399287	-0.00350465
2023-06-16	933.707	108.315	33.65	13.54	5.97	104.43	32.99	12.4	13.07	0.00300717	0.00194997
2023-06-19	931.56	108.125	34.37	14.19	5.97	104.43	32.99	12.4	14.22	-0.00229997	-0.00175322
2023-06-20	936.542	108.588	35.14	13.88	6.27	114.19	34.75	12.73	14.65	0.00534813	0.00427745
2023-06-21	935.062	108.423	35.06	13.2	6.13	110.84	33.26	12.98	14.4	-0.00158049	-0.00151398
2023-06-22	931.278	108.058	35.64	12.91	6	107.7	34.93	12.96	14.86	-0.00404626	-0.0033692
2023-06-23	937.615	108.653	36.51	13.44	6.02	105.74	35.36	12.73	15.35	0.0068042	0.00551
2023-06-26	939.36	108.816	38.61	14.25	6.64	109.02	36.67	13.08	15.88	0.001861	0.00150018
2023-06-27	935.748	108.48	37.36	13.74	6.59	110.85	39.3	12.88	15.2	-0.00384496	-0.0030942
2023-06-28	937.914	108.693	35.73	13.43	6.72	108.3	36.86	12.53	14.21	0.00231462	0.00196811
2023-06-29	933.878	108.341	34.89	13.54	6.66	113.45	35.42	12.21	14.25	-0.00430285	-0.00324031
2023-06-30	934.046	108.403	31.71	13.59	6.64	110.64	33.28	12.04	13.61	0.000180002	0.000570421
2023-07-03	932.946	108.334	32.02	13.57	6.74	110.77	33.88	12.22	13.65	-0.00117778	-0.00063836
2023-07-04	933.611	108.44	32.23	13.7	6.74	110.77	33.88	12.22	14.1	0.000712581	0.000983998
2023-07-05	933.716	108.472	33.79	14.18	7.7	110.53	33.91	12.46	15.29	0.000112038	0.000295094
2023-07-06	926.81	107.826	39.23	15.44	6.97	134.63	35.13	12.25	19.23	-0.00739572	-0.00595821
2023-07-07	928.145	107.921	37.88	14.83	6.58	130.41	34.55	12.12	17.54	0.00143978	0.000883832
2023-07-10	928.351	107.903	36.28	15.07	6.67	131.73	38.35	12.41	17.5	0.000222056	-0.000167715
2023-07-11	928.418	107.919	33.25	14.84	6.67	127.07	32.43	12.64	16.57	7.27096e-05	0.000146428
2023-07-12	933.467	108.496	30.1	13.54	6.76	114.07	32.69	13.12	15.18	0.00543807	0.00534846
2023-07-13	938.411	108.95	31.45	13.61	6.76	111.75	30.04	12.73	15.05	0.00529681	0.00418264
2023-07-14	938.128	108.907	32.9	13.34	6.76	112.48	30	12.05	14.8	-0.000302	-0.000391005
2023-07-17	939.05	108.956	34.84	13.48	7.03	113.5	31.34	12.34	15.83	0.000982382	0.000447169
2023-07-18	944.644	109.502	32.66	13.3	7.09	112.45	30.66	12.62	15.51	0.00595805	0.00501211
2023-07-19	943.384	109.406	32.81	13.76	6.93	107.19	31.06	12.89	15.97	-0.00133415	-0.000873043
2023-07-20	940.278	109.104	35.1	13.99	7.19	112.85	30.15	12.67	15.69	-0.00329261	-0.00276583
2023-07-21	941.976	109.259	33.06	13.6	6.93	106.66	29.65	12.23	14.94	0.00180542	0.00142158
2023-07-24	944.314	109.481	34.03	13.91	7.38	109.95	30.11	12.35	15.53	0.00248202	0.00202912
2023-07-25	943.728	109.416	34.02	13.86	7.29	113.02	30.63	12.42	15.48	-0.000620557	-0.000591885
2023-07-26	941.232	109.166	33.86	13.19	7.1	104.88	29.97	12.11	16.1	-0.00264398	-0.00228029
2023-07-27	942.978	109.331	31.23	14.41	7.33	111.15	29.12	12.29	14.97	0.00185448	0.00150596
2023-07-28	943.952	109.437	30.14	13.33	7.12	109.76	29.41	11.78	15.22	0.00103332	0.000967705
2023-07-31	944.939	109.544	32.52	13.63	7.32	112.03	28.48	12.16	16.23	0.00104571	0.000982304
2023-08-01	941.373	109.325	34.9	13.93	7.1	116.38	28.35	11.83	17.19	-0.00377432	-0.00200011
2023-08-02	942.822	109.454	39.01	16.09	7.27	115.15	28.74	12.45	19.71	0.00153935	0.00117539
2023-08-03	941.124	109.296	40.74	15.92	7.39	124.6	28.54	12.79	19.65	-0.00180098	-0.00143897
2023-08-04	941.198	109.305	37.85	17.1	6.91	115.91	28.06	12.22	18.35	7.82044e-05	8.32601e-05
2023-08-07	941.281	109.337	39.33	15.77	7.09	120.94	27.73	12.24	18.62	8.87168e-05	0.000291844
2023-08-08	945.993	109.768	42.19	15.99	6.87	118.74	27.14	12.21	19.54	0.00500626	0.00394103
2023-08-09	944.479	109.634	38.81	15.96	6.87	112.55	28.56	12.33	18.98	-0.00160096	-0.00122349
2023-08-10	942.75	109.473	35.96	15.85	6.87	108.64	27.27	11.84	18.08	-0.00183032	-0.00146488
2023-08-11	938.813	109.1	37.24	14.84	6.87	112.13	28.04	11.54	18.37	-0.00417661	-0.00340906
2023-08-14	938.409	109.016	37.68	14.82	7.18	119.94	27.55	11.97	18.05	-0.000429905	-0.000770854
2023-08-15	936.103	108.809	39.4	16.46	7.05	121.8	28.3	12.11	18.86	-0.00245714	-0.00189881
2023-08-16	937.521	108.916	41.18	16.78	7.08	117.24	28.54	12.43	18.55	0.0015149	0.000982458
2023-08-17	935.233	108.707	43.77	17.89	7.21	121.14	29.3	12.89	20.35	-0.00244133	-0.00191341
2023-08-18	937.831	108.955	46.83	17.3	7.3	120.51	28.43	12.63	20.25	0.00277824	0.00228044
2023-08-21	934.265	108.608	46.61	17.13	7.17	130.69	28.9	12.91	19.84	-0.00380228	-0.00318572
2023-08-22	936.158	108.788	45.41	16.97	7.35	126.65	28.56	12.58	19.13	0.00202641	0.00166102
2023-08-23	942.422	109.391	41.41	15.98	7.33	118.4	28.47	12.67	18.5	0.00669128	0.00554011
2023-08-24	942.484	109.417	40.75	17.2	7.68	117.56	28.88	12.53	18.9	6.5894e-05	0.000240422
2023-08-25	939.972	109.172	40.24	15.68	7.34	110.37	28.81	12.09	18.47	-0.00266604	-0.00223913
2023-08-28	939.599	109.081	40.24	15.08	7.44	110.45	28.66	12.21	17.82	-0.000396714	-0.000835376
2023-08-29	941.929	109.344	36.34	14.45	7.07	110.68	27.63	12.5	16.78	0.00247957	0.00240463
2023-08-30	940.924	109.293	35.22	13.88	6.91	109.84	26.63	12.39	16.56	-0.001066	-0.000458189
[truncated: 367 more rows]
